# Supplementary material for: MiR-199a-3p Regulates the PTPRF/β-Catenin Axis in Hair Follicle Development: Insights into the Pathogenic Mechanism of Alopecia Areata
Source: Int J Mol Sci. 2023 Dec 18;24(24):17632. doi: 10.3390/ijms242417632 (PMC10743674; doi:10.3390/ijms242417632)
Supplement: Supplementary file 1 [file ijms-24-17632-s001.zip]

Archive with 5 entries (5 files):
- Figure S5.pdf
- ijms-2695007-supplementary.pdf
- Table S1.xlsx
- Table S2.xlsx
- Table S3.xlsx
