# Supplementary material for: MiR-199a-3p Regulates the PTPRF/β-Catenin Axis in Hair Follicle Development: Insights into the Pathogenic Mechanism of Alopecia Areata
Source: Int J Mol Sci. 2023 Dec 18;24(24):17632. doi: 10.3390/ijms242417632 (PMC10743674; doi:10.3390/ijms242417632)
Supplement: Supplementary file 1 [file ijms-24-17632-s001.zip › Table S1.xlsx]

## Sheet: Primers used in this study
Primers used in this study
Application	Genes	Primers	Primer sequences(5′-3′)	Ta value(°C)
qPCR	c-MYC(mouse)	qMYC-M-f1	CCTAGTGCTGCATGAGGAGA	57
		qMYC-M-r1	GTTGTGCTGGTGAGTGGAGA
	Axin(mouse)	qAxin-M-f1	ACTCTGGAGGCTTTCGTTTG	55
		qAxin-M-r1	TTAAGTCAGCAGGGGCTCAT
	Cd44(mouse)	qCd44-M-f1	GAAGTCGCAAGGAAACAAGC	60
		qCd44-M-r1	GTTGTAGGTGAACGGGAGGA
	Cdx1(mouse)	qCdx1-M-f1	ATGTACGTGGGCTATGTGCT	59
		qCdx1-M-r1	CCTTGTCCAGCACATAGCCCAC
	Cyclind1(mouse)	qCyclind1-M-f1	GCGTACCCTGACACCAATCT	60
		qCyclind1-M-r1	CAGGTCTCCTCCGTCTTGAG
	Fn1(mouse)	qFn1-M-f1	GAAGTCGCAAGGAAACAAGC	57
		qFn1-M-r1	GTTGTAGGTGAACGGGAGGA
	Mmp7(mouse)	qMmp7-M-f1	CACTCACTGGGTCCTCCATT	59
		qMmp7-M-r1	GAAGAGGGAAACAGGTGCAG
	β-actin(mouse)	qActin-M-f1	GACAACGGCTCCGGCATGTG	60
		qActin-M-r1	TCTTCTCCATGTCGTCCCAGT
	c-MYC(Sheep)	qMYC-S-f1	ACCAGATCCCGGAGTTGGAA	55
		qMYC-S-r1	CAACTGTTCTCGTCGTTTCC
	Axin(Sheep)	qAxin-S-f1	AGGGAGAACTGGTGTCCACAGA	60
		qAxin-S-r1	CTTCATTTAAGGTCGGCAGGTAT
	Cd44(Sheep)	qCd44-S-f1	TGAGCATCGGATTTGAGACC	59
		qCd44-S-r1	ACTGGGAGGTGTTGGATGTG
	Cdx1(Sheep)	qCdx1-S-f1	GCGCCCTTCCCTGCGCCCAA	57
		qCdx1-S-r1	TGGCAGCCAGCTCTGATTTCC
	Cyclind1(Sheep)	qCyclind1-S-f1	ATGCCAGAGGCGGAGGAGAA	55
		qCyclind1-S-r1	TGAGGCGGTAGTAGGACAGGAAG
	Fn1(Sheep)	qFn1-S-f1	ATCACCCTCACCAACCTCA	58
		qFn1-S-r1	GGCTATTTCCTCCTGTTTCTC
	Mmp7(Sheep)	qMmp7-S-f1	AGGCTCAGGACTATCTCAAGAG	56
		qMmp7-S-r1	AACATCTGGCACTCCACATC
	β-actin(Sheep)	qActin-S-f1	CCTGTTCCTCCCTGGAGAAG	59
		qActin-S-r1	CTGTCAGCAATGCCAGGGTA

## Sheet:  The genome websites
The genome websites
Species	Websites
Human	ftp://ftp.ncbi.nlm.nih.gov/genomes/all/GCF_000001405.33 _GRCh38.p7/GCF_000001405.33_GRCh38.p7_genomic.fna.gz
Mouse	ftp://ftp.ncbi.nlm.nih.gov/genomes/all/GCF/000/001/635/GCF_000001635.26_GRCm38.p6/GCF_000001635.26_ GRCm38.p6_genomic.fna.gz
Sheep	ftp://ftp.ncbi.nlm.nih.gov/genomes/all/GCF_000298735.2_Oar_v4.0/GCF_000298735.2_Oar_v4.0_genomic.fna.gz
