# Supplementary material for: MiR-199a-3p Regulates the PTPRF/β-Catenin Axis in Hair Follicle Development: Insights into the Pathogenic Mechanism of Alopecia Areata
Source: Int J Mol Sci. 2023 Dec 18;24(24):17632. doi: 10.3390/ijms242417632 (PMC10743674; doi:10.3390/ijms242417632)
Supplement: Supplementary file 1 [file ijms-24-17632-s001.zip › Table S2.xlsx]

## Sheet: Sheet1
Table S2. The peptide identification results
Annotated Sequence	Modifications	# Protein Groups	# Proteins	# PSMs	Master Protein Accessions	Positions in Master Proteins	# Missed Cleavages	Theo. MH+ [Da]	Sequence Length	Abundance case 1	Abundance case 2	Abundance case 3	Abundance ctrl 1	Abundance ctrl 2	Abundance ctrl 3	Quan Info	Charge	m/z [Da]	Percolator PEP	XCorr
[K].QQAQTEQAQLTQTLR.[Q]	1xTMT6plex [N-Term]	1	1	6	W5P0C1	W5P0C1 [525-539]	0	1973.06	15	1.61759e+06	1.45866e+06	1.69183e+06	1.71224e+06	1.78627e+06	1.60831e+06		3	658.358	1.078e-05	4.75
[K].NSCIVCNMGHSNTEIDVASLR.[T]	2xCarbamidomethyl [C3; C6]; 1xTMT6plex [N-Term]	1	2	1	W5P2N4	W5P2N4 [431-451]	0	2606.23	21	1.89745e+06	1.34068e+06	4.06809e+06	1.97984e+06	2.03235e+06	1.38763e+06		3	869.411	5.018e-05	3.77
[R].EPQVYVLAPPQEELSK.[S]	1xTMT6plex [K16]; 1xTMT6plex [N-Term]	2	2	23	W5Q7I2; W5PH95	W5Q7I2 [104-119]; W5PH95 [290-305]	0	2285.28	16	5.31074e+07	4.95071e+07	6.62098e+07	1.74138e+08	1.87799e+08	1.4579e+08	Shared	2	1143.15	1.195e-06	4.93
[R].EPQVYVLAPPQEELSK.[S]	1xDeamidated [Q]; 1xTMT6plex [K16]; 1xTMT6plex [N-Term]	2	2	7	W5Q7I2; W5PH95	W5Q7I2 [104-119]; W5PH95 [290-305]	0	2286.26	16	3.37996e+06	3.29738e+06	4.15523e+06	5.94015e+06	6.01614e+06	5.56548e+06	Shared	3	762.755	6.186e-06	3.99
[R].EPQVYVLAPPQEELSK.[S]	2xDeamidated [Q3; Q11]; 1xTMT6plex [K16]; 1xTMT6plex [N-Term]	2	2	1	W5Q7I2; W5PH95	W5Q7I2 [104-119]; W5PH95 [290-305]	0	2287.25	16	195854	139890	180387	419957	449940	366675	Shared	2	1144.13	1.448e-05	3.19
[R].NSAFESLYQDK.[F]	1xTMT6plex [K11]; 1xTMT6plex [N-Term]	1	1	1	W5PWZ8	W5PWZ8 [1315-1325]	0	1759.93	11	1.15832e+06	998341	1.24333e+06	1.24165e+06	1.30811e+06	1157687		2	880.464	2.155e-05	2.44
[K].NRPTSITWDGLDPGK.[L]	1xTMT6plex [K15]; 1xTMT6plex [N-Term]	1	3	12	W5NYA7	W5NYA7 [48-62]	0	2115.16	15	3.09216e+07	3.01576e+07	38072611	3.87577e+07	4.3737e+07	4.15593e+07		3	705.719	5.181e-07	4.5
[R].LEEDLGQIEK.[Q]	1xTMT6plex [K10]; 1xTMT6plex [N-Term]	1	1	2	W5PER5	W5PER5 [524-533]	0	1631.93	10	483919	451786	552355	571463	667279	567830		2	816.467	7.113e-05	2.64
[R].NRPLSDEELDAMFPEGYK.[V]	1xTMT6plex [K18]; 1xTMT6plex [N-Term]	1	1	1	W5Q1B2	W5Q1B2 [396-413]	0	2569.3	18	1121550	1.02299e+06	1.07932e+06	731239	735232	710654		3	857.101	1.559e-05	2.69
[K].EPSSQDALQGR.[R]	1xTMT6plex [N-Term]	1	1	6	W5P6M6	W5P6M6 [37-47]	0	1416.73	11	1.38869e+06	1.39108e+06	1.76861e+06	1.43571e+06	1647891	1.40332e+06		2	708.87	3.024e-06	2.51
[K].EPTPSIASDISLPIATQELR.[Q]	1xTMT6plex [N-Term]	1	1	2	W5PJ14	W5PJ14 [627-646]	0	2367.3	20	258006	228136	302931	303620	313851	269833		3	789.771	1.939e-05	4.21
[K].NREPVQLETLSIR.[G]	1xTMT6plex [N-Term]	1	3	2	W5PEQ0	W5PEQ0 [42-54]	1	1784.02	13	2.51271e+06	2.4575e+06	2.93983e+06	2493884	3.26041e+06	3.17022e+06		3	595.343	5.656e-07	5.14
[R].EPVDPEVFFNATGCLR.[-]	1xCarbamidomethyl [C14]; 1xTMT6plex [N-Term]	1	1	7	W5Q9K6	W5Q9K6 [338-353]	0	2080.04	16	7.36799e+06	6.54122e+06	8.21835e+06	1.15e+07	1.28294e+07	1.1624e+07		2	1040.52	9.7e-06	3.12
[R].EPVDPEVFFNATGCLR.[-]	1xCarbamidomethyl [C14]; 1xDeamidated [N10]; 1xTMT6plex [N-Term]	1	1	3	W5Q9K6	W5Q9K6 [338-353]	0	2081.02	16	2.0946e+06	1.86444e+06	2.24181e+06	3.38276e+06	3.58625e+06	3.37577e+06		3	694.343	0.0001178	3.81
[K].LEEDINSSMTNSTAASRPPVTLR.[L]	1xTMT6plex [N-Term]	1	1	1	W5QE14	W5QE14 [79-101]	0	2718.39	23	698372	660442	726204	841558	927359	835465		3	906.797	2.447e-08	5.68
[K].EPVEVATCVGR.[N]	1xCarbamidomethyl [C8]; 1xTMT6plex [N-Term]	1	1	5	W5Q0Z6	W5Q0Z6 [131-141]	0	1445.76	11	4.85624e+06	4.94153e+06	5.12961e+06	3.78497e+06	4312036	3.69081e+06		2	723.381	8.291e-06	3.02
[K].EPVFSAEEGYVK.[M]	1xTMT6plex [K12]; 1xTMT6plex [N-Term]	1	1	1	W5NSR2	W5NSR2 [159-170]	0	1812.98	12	764675	690392	831969	665544	640484	641633		2	906.988	4.58e-06	3.53
[K].EPVGEGEALLGMDLLR.[L]	1xTMT6plex [N-Term]	1	1	2	W5PDD6	W5PDD6 [114-129]	0	1928.04	16	123307	251015	179534	262222	203850	535341		3	643.349	9.561e-05	1.93
[R].EPVGTCFLQDGTK.[T]	1xCarbamidomethyl [C6]; 1xTMT6plex [K13]; 1xTMT6plex [N-Term]	1	2	2	B0FYY5	B0FYY5 [153-165]	0	1910.01	13	2.31827e+06	2.2863e+06	2.50557e+06	2.54904e+06	3.04197e+06	2.78578e+06		2	955.506	8.548e-06	2.61
[R].EPVPCAALTEALAATEPGESGLER.[L]	1xCarbamidomethyl [C5]; 1xTMT6plex [N-Term]	1	1	1	W5PZ26	W5PZ26 [48-71]	0	2697.36	24	57682	38931.9	42535	51910.4	57505.9	51490.9		3	899.792	2.334e-06	3.77
[R].NQYDNDVTVWSPQGR.[I]	1xDeamidated [N/Q]; 1xTMT6plex [N-Term]	1	1	2	W5P9U4	W5P9U4 [4-18]	0	2008.96	15	270021	289480	326161	315468	367552	329206		2	1004.98	1.795e-05	2.87
[R].EPVQTLYSQSPALELDK.[F]	1xTMT6plex [K17]; 1xTMT6plex [N-Term]	1	1	2	W5QDF0	W5QDF0 [376-392]	0	2376.31	17	958334	701546	1.10035e+06	1.07249e+06	943661	998051		3	792.771	1.224e-07	4.95
[R].NQYDNDVTVWSPQGR.[I]	1xTMT6plex [N-Term]	1	1	4	W5P9U4	W5P9U4 [4-18]	0	2007.97	15	2.99269e+06	2.16108e+06	3.25878e+06	1.93694e+06	2.14683e+06	1.82761e+06		2	1004.48	4.506e-07	3
[K].KGPILELLTEVTR.[R]	1xTMT6plex [K1]; 1xTMT6plex [N-Term]	1	1	1	W5P2Y4	W5P2Y4 [203-215]	1	1927.2	13	756959	647129	763453	1.07506e+06	1.27114e+06	1.18529e+06		3	643.066	1.446e-06	3.91
[K].NSCIVCNMGHSNTEIDVTSLR.[T]	2xCarbamidomethyl [C3; C6]; 1xTMT6plex [N-Term]	1	2	1	W5QDK9	W5QDK9 [446-466]	0	2636.24	21	809162	695831	867267	964006	1.01499e+06	923518		3	879.413	1.486e-06	4.31
[K].NSCIVCNMGHSNTEIDVTSLR.[T]	2xCarbamidomethyl [C3; C6]; 1xDeamidated [N12]; 1xTMT6plex [N-Term]	1	2	1	W5QDK9	W5QDK9 [446-466]	0	2637.23	21	771801	728729	908696	947380	1.0482e+06	957148		3	879.75	1.64e-05	3.02
[K].NSDEADLVPAK.[E]	1xTMT6plex [K11]; 1xTMT6plex [N-Term]	1	3	10	W5PTW7	W5PTW7 [140-150]	0	1616.89	11	8.36223e+06	8.49332e+06	8.87048e+06	6.71949e+06	8.46348e+06	6.3619e+06		2	808.946	3.532e-05	2.92
[K].EPPLFLGVLQPNTK.[L]	1xTMT6plex [K14]; 1xTMT6plex [N-Term]	1	1	4	W5P935	W5P935 [73-86]	0	2011.2	14	5.10828e+06	4.82064e+06	5.72799e+06	5.93903e+06	6.83499e+06	6.03033e+06		2	1006.1	3.008e-05	3.41
[K].NSGLPPGAAAVALLPVTLDTPVNR.[K]	1xTMT6plex [N-Term]	1	1	1	W5PKX5	W5PKX5 [148-171]	0	2572.47	24	45062.8	29916.3	54270.1	68370.2	67528.9	64409.8		3	858.153	9.833e-05	1.66
[K].NSGELEATSSFLESGQR.[A]	1xTMT6plex [N-Term]	1	1	2	W5PAP1	W5PAP1 [307-323]	0	2041	17	217204	189247	221994	208354	217644	203535		3	681.004	7.729e-05	3.63
[R].LEEALEQLAK.[Q]	1xTMT6plex [K10]; 1xTMT6plex [N-Term]	1	1	2	W5PQF5	W5PQF5 [184-193]	0	1601.95	10	3.96918e+06	3.55391e+06	4.47661e+06	4.47306e+06	5.02006e+06	4.69778e+06		2	801.48	7.587e-05	4.32
[K].EPLGPALAHELR.[Y]	1xTMT6plex [N-Term]	1	1	10	W5QIK8	W5QIK8 [449-460]	0	1531.88	12	3.66815e+06	3.34529e+06	3.79762e+06	3.55163e+06	4.08469e+06	3.59168e+06		3	511.294	3.52e-07	4.79
[R].EPLLASEIASSR.[E]	1xTMT6plex [N-Term]	1	2	1	W5P9W0	W5P9W0 [1156-1167]	0	1501.84	12	424242	415931	449939	507227	589314	476053		2	751.426	1.491e-05	3.01
[K].NSEQGLDELINVSPK.[A]	1xTMT6plex [K15]; 1xTMT6plex [N-Term]	1	2	2	W5Q5D1	W5Q5D1 [462-476]	0	2101.15	15	1.4363e+06	1.78384e+06	1.99963e+06	3.47503e+06	1.7964e+06	1.63304e+06		3	701.056	1.219e-05	3.29
[K].IEEAMDGSETPQLFTVLPEK.[R]	1xTMT6plex [K20]; 1xTMT6plex [N-Term]	2	2	3	W5NVP5; W5NVP7	W5NVP5 [752-771]; W5NVP7 [611-630]	0	2692.42	20	4.1344e+06	4.05988e+06	4.5092e+06	4.52055e+06	5603168	4.40034e+06	Shared	3	898.139	4.134e-06	4.16
[R].NSEGWEQNGLYEFFR.[A]	1xDeamidated [N8]; 1xTMT6plex [N-Term]	1	1	1	W5QC32	W5QC32 [696-710]	0	2105.98	15	592749	545526	638666	506863	642477	543063		2	1053.49	2.699e-05	2.97
[R].NSEGEATELITETFTSK.[S]	1xTMT6plex [K17]; 1xTMT6plex [N-Term]	1	1	2	W5Q3Q2	W5Q3Q2 [201-217]	0	2315.2	17	709114	691233	730328	784528	836180	750437		3	772.405	2.499e-05	3.26
[K].NSEEFAAAMSK.[Y]	1xTMT6plex [K11]; 1xTMT6plex [N-Term]	1	1	1	W5Q7J0	W5Q7J0 [90-100]	0	1642.85	11	1776051	1.54395e+06	1.86164e+06	2153096	2.18162e+06	2.04615e+06		2	821.931	0.000112	3.3
[K].EPIMPAPGQEETVR.[I]	1xTMT6plex [N-Term]	1	1	12	W5QH03	W5QH03 [543-556]	0	1782.93	14	3.43192e+06	3.41818e+06	3.64399e+06	3.50508e+06	3.87533e+06	3.55422e+06		2	891.965	2.864e-06	3.25
[K].EPVVLALAEK.[H]	1xTMT6plex [K10]; 1xTMT6plex [N-Term]	1	1	10	W5NUN8	W5NUN8 [231-240]	0	1526.96	10	3.29189e+07	2.88877e+07	3.6467e+07	3.82124e+07	4.52997e+07	4.20085e+07		2	763.977	4.808e-05	4.4
[K].NSDVLQSPLDSAAR.[D]	1xTMT6plex [N-Term]	1	1	1	W5Q3J3	W5Q3J3 [612-625]	0	1701.9	14	1.2375e+06	1125417	1.27503e+06	1.17197e+06	1.27053e+06	1.16866e+06		2	851.452	8.094e-06	3.37
[K].EPLRPSQQAPSSSGPPDPQAQK.[L]	1xDeamidated [Q8]; 1xTMT6plex [K22]; 1xTMT6plex [N-Term]	1	1	1	W5PER5	W5PER5 [495-516]	0	2761.45	22	272485	316678	347029	375515	405094	357114		3	921.155	2.704e-07	4.45
[R].NSDSILEAIQK.[K]	1xTMT6plex [K11]; 1xTMT6plex [N-Term]	1	1	5	W5NRY1	W5NRY1 [141-151]	0	1675.96	11	6.4783e+06	6.09659e+06	7.49682e+06	7.21329e+06	8.49623e+06	7.40517e+06		2	838.481	1.841e-05	4.56
[K].EPLVDVVDPK.[Q]	1xTMT6plex [K10]; 1xTMT6plex [N-Term]	1	2	12	W5PV62	W5PV62 [188-197]	0	1568.93	10	5.04563e+06	4.8409e+06	5.58887e+06	5.88866e+06	6.49003e+06	6.0536e+06		2	784.967	7.232e-05	3.83
[R].LEEAWAPRPQEEAGR.[A]	1xTMT6plex [N-Term]	1	1	3	W5NXM6	W5NXM6 [134-148]	0	1968.01	15	1.85732e+06	1.48191e+06	1.94213e+06	1.88104e+06	2.1382e+06	1.81841e+06		3	656.676	4.181e-05	3.43
[R].EPIYFTGLASEPGAR.[S]	1xTMT6plex [N-Term]	1	2	1	W5QD10	W5QD10 [666-680]	0	1836.97	15	2.07533e+06	1.28299e+06	2.11724e+06	1.38665e+06	1.63952e+06	1.41447e+06		2	918.983	4.355e-06	3.07
[R].NSDQASMPDNTAAQK.[V]	1xDeamidated [N]; 1xTMT6plex [K15]; 1xTMT6plex [N-Term]	1	1	11	W5QBQ9	W5QBQ9 [361-375]	0	2037	15	3.80146e+06	3.51872e+06	4.25609e+06	4.69347e+06	5.721e+06	4.71795e+06		2	1019	6.524e-05	2.98
[R].NSDQASMPDNTAAQK.[V]	1xTMT6plex [K15]; 1xTMT6plex [N-Term]	1	1	5	W5QBQ9	W5QBQ9 [361-375]	0	2036.01	15	3.91911e+06	3.7387e+06	3.92934e+06	5.22362e+06	6.33319e+06	5.57562e+06		2	1018.51	5.762e-08	5.75
[K].NSDPLVGVILDNGGK.[T]	2xDeamidated [N1; N12]; 1xTMT6plex [K15]; 1xTMT6plex [N-Term]	1	1	8	W5Q5Q6	W5Q5Q6 [1321-1335]	0	1958.08	15	3.10508e+06	2.98811e+06	3.34676e+06	3.07393e+06	3.33549e+06	2.8704e+06		2	979.551	4.87e-07	3.73
[K].NSDPLVGVILDNGGK.[T]	1xDeamidated [N]; 1xTMT6plex [K15]; 1xTMT6plex [N-Term]	1	1	19	W5Q5Q6	W5Q5Q6 [1321-1335]	0	1957.1	15	1.90991e+07	1.93489e+07	1.74695e+07	1.03421e+07	1.15762e+07	1.0879e+07		2	979.052	4.703e-08	4.6
[K].NSDPLVGVILDNGGK.[T]	1xTMT6plex [K15]; 1xTMT6plex [N-Term]	1	1	4	W5Q5Q6	W5Q5Q6 [1321-1335]	0	1956.12	15	4.44323e+06	4.82109e+06	4.21045e+06	2.78132e+06	3.22493e+06	2.85811e+06		2	978.556	1.625e-06	3.69
[K].KGQGGAGAGDDEEED.[-]	1xTMT6plex [K1]; 1xTMT6plex [N-Term]	1	1	11	W5NXM4	W5NXM4 [180-194]	1	1892.89	15	8.25056e+06	7.5405e+06	1.02512e+07	9.13884e+06	1.05167e+07	9.83291e+06		3	631.632	6.816e-06	3.71
[R].NSDVEIFAVGVK.[D]	1xTMT6plex [K12]; 1xTMT6plex [N-Term]	1	1	2	W5P8W6	W5P8W6 [566-577]	0	1736	12	4.02725e+06	3.56358e+06	4.54158e+06	5.21593e+06	6.16781e+06	5675952		2	868.497	0.0001227	2.93
[R].NSGSCLGGDEIFLLCDK.[V]	2xCarbamidomethyl [C5; C15]; 1xTMT6plex [K17]; 1xTMT6plex [N-Term]	1	1	1	W5Q7L5	W5Q7L5 [202-218]	0	2343.17	17	531924	501111	591564	648043	728466	631644		3	781.726	4.843e-06	2.72
[R].NQVVQEICAEEACK.[E]	2xCarbamidomethyl [C8; C13]; 1xTMT6plex [K14]; 1xTMT6plex [N-Term]	1	1	3	W5PZB9	W5PZB9 [602-615]	0	2136.08	14	922131	889000	849609	667350	695372	574429		3	712.697	3.681e-05	4.22
[K].NQVAMNPTNTVFDAK.[R]	1xTMT6plex [K15]; 1xTMT6plex [N-Term]	1	1	12	W5NPN4	W5NPN4 [57-71]	0	2108.12	15	2.57914e+07	2.43834e+07	3.05601e+07	2.71264e+07	3.37526e+07	3.26207e+07		2	1054.56	4.117e-08	4.44
[R].EQEEYGGEEELQQRPK.[G]	1xTMT6plex [K16]; 1xTMT6plex [N-Term]	2	2	24	P22793; W5QIV5	P22793 [161-176]; W5QIV5 [161-176]	0	2407.21	16	2.87489e+07	2.79462e+07	3.61891e+07	3.2282e+07	3.46109e+07	3.0405e+07	Shared	3	803.079	4.29e-08	5.11
[R].NQIISATTSNANIVLQNDNAR.[L]	1xTMT6plex [N-Term]	1	2	13	B0LKN9	B0LKN9 [147-167]	0	2486.32	21	1.7316e+07	1.55517e+07	1.98523e+07	2.21383e+07	2.55896e+07	2.29816e+07		2	1243.66	5.975e-11	6.03
[K].NQILNLTTDNANILIQVDNAR.[L]	2xDeamidated [N10; N12]; 1xTMT6plex [N-Term]	1	1	3	W5Q160	W5Q160 [191-211]	0	2584.38	21	2.04831e+06	1.96072e+06	2.72696e+06	4.93373e+06	3.14056e+06	5.12063e+06		3	862.136	4.917e-05	4
[K].NQILNLTTDNANILIQVDNAR.[L]	1xDeamidated [N]; 1xTMT6plex [N-Term]	1	1	2	W5Q160	W5Q160 [191-211]	0	2583.39	21	5.67736e+06	5.99904e+06	7.84475e+06	16515619	8.97557e+06	1.64418e+07		2	1292.2	3.123e-09	5.63
[K].NQILNLTTDNANILIQVDNAR.[L]	1xTMT6plex [N-Term]	1	1	7	W5Q160	W5Q160 [191-211]	0	2582.41	21	1.72007e+07	1.71954e+07	1.95789e+07	1.96606e+07	2.40081e+07	2.27184e+07		3	861.466	1.136e-10	6.07
[K].EQEHMINWVEK.[H]	1xTMT6plex [K11]; 1xTMT6plex [N-Term]	1	2	3	W5QEA9	W5QEA9 [211-221]	0	1901	11	1.57982e+06	1.49844e+06	1.87943e+06	1.88248e+06	3.21963e+06	3.03908e+06		2	950.997	3.848e-05	3.71
[K].NQIIASTTSNANAVLQIDNAR.[L]	2xDeamidated [N10; N12]; 1xTMT6plex [N-Term]	1	2	14	W5Q0H4	W5Q0H4 [142-162]	0	2445.28	21	1.0951e+07	9.87715e+06	1.19303e+07	1.07562e+07	1.23644e+07	1.16771e+07		3	815.764	8.752e-06	4.61
[K].NQIIASTTSNANAVLQIDNAR.[L]	1xDeamidated [Q/N]; 1xTMT6plex [N-Term]	1	2	51	W5Q0H4	W5Q0H4 [142-162]	0	2444.29	21	6.29798e+07	5.75324e+07	7.5389e+07	7.55751e+07	7.9854e+07	7.51724e+07		2	1222.65	1.066e-10	4.21
[K].NQIIASTTSNANAVLQIDNAR.[L]	1xTMT6plex [N-Term]	1	2	41	W5Q0H4	W5Q0H4 [142-162]	0	2443.31	21	7.45252e+07	7.3241e+07	8.2196e+07	9.16751e+07	1.00362e+08	9.28671e+07		2	1222.15	6.239e-13	5
[K].EQELQQTLQQEQSVLEK.[L]	1xTMT6plex [K17]; 1xTMT6plex [N-Term]	1	1	10	W5Q2U7	W5Q2U7 [1896-1912]	0	2516.36	17	4.31766e+06	4.12026e+06	4.54491e+06	5.49169e+06	6.71489e+06	5.45084e+06		2	1258.69	2.207e-07	4.75
[R].EQEITAVQAR.[M]	1xTMT6plex [N-Term]	1	1	9	W5Q8J3	W5Q8J3 [884-893]	0	1373.76	10	5.35704e+06	4.64568e+06	6.32958e+06	4.25297e+06	5.36709e+06	4.91156e+06		2	687.382	9.742e-05	3.21
[K].NQLEEVPAALPR.[N]	1xTMT6plex [N-Term]	1	1	21	W5NUA0	W5NUA0 [159-170]	0	1565.88	12	2.15791e+07	2.12007e+07	2.19013e+07	3.97586e+07	4.9069e+07	4.51772e+07		2	783.443	3.343e-06	4.31
[K].NQLEESEFTCAAAVK.[A]	1xCarbamidomethyl [C10]; 1xTMT6plex [K15]; 1xTMT6plex [N-Term]	1	1	4	W5P7P6	W5P7P6 [1654-1668]	0	2155.11	15	3.75349e+06	2.24009e+06	4.12887e+06	2.10106e+06	2.48522e+06	2.27214e+06		2	1078.05	7.172e-10	4.46
[K].EQETTCICENGR.[Q]	2xCarbamidomethyl [C6; C8]; 1xTMT6plex [N-Term]	1	1	2	W5NSA6	W5NSA6 [846-857]	0	1725.77	12	515897	394065	504526	928620	1.1167e+06	720585		2	863.391	2.134e-05	3.55
[K].EQETTCICENGR.[Q]	2xCarbamidomethyl [C6; C8]; 1xDeamidated [N10]; 1xTMT6plex [N-Term]	1	1	2	W5NSA6	W5NSA6 [846-857]	0	1726.76	12	304385	213759	322389	536050	561253	454663		2	863.885	5.899e-06	3.45
[R].NQICEVLDTDLIR.[Q]	1xCarbamidomethyl [C4]; 1xTMT6plex [N-Term]	1	1	1	W5Q7F3	W5Q7F3 [153-165]	0	1817.96	13	187229	138538	224672	160435	189357	162542		2	909.479	5.886e-05	2.04
[R].KGLQVDLHSDGPAAEDTVASEQSLGQK.[L]	2xTMT6plex [K1; K27]; 1xTMT6plex [N-Term]	1	1	1	W5PTC8	W5PTC8 [30-56]	1	3467.86	27	451184	436305	576491	502299	524139	458893		4	867.716	4.727e-07	5.47
[K].NQGSGLSPNGAGEGQGPK.[K]	2xDeamidated [Q2; N9]; 1xTMT6plex [K18]; 1xTMT6plex [N-Term]	1	1	1	W5PQF8	W5PQF8 [991-1008]	0	2115.07	18	253866	247584	283440	248533	268270	248472		2	1058.05	0.0001161	2.22
[K].NQGSGLSPNGAGEGQGPK.[K]	1xDeamidated [N9]; 1xTMT6plex [K18]; 1xTMT6plex [N-Term]	1	1	1	W5PQF8	W5PQF8 [991-1008]	0	2114.09	18	403199	425829	532144	387816	454137	419634		3	705.372	5.273e-05	3.5
[K].NQGSCGSCWTFSTTGALESAVAIATGK.[L]	2xCarbamidomethyl [C5; C8]; 1xTMT6plex [K27]; 1xTMT6plex [N-Term]	1	2	2	W5PZ47	W5PZ47 [134-160]	0	3219.58	27	203960	192188	217595	248803	222208	180952		3	1073.86	3.387e-06	5.09
[K].EQFASTNIAEELVK.[L]	1xDeamidated [N7]; 1xTMT6plex [K14]; 1xTMT6plex [N-Term]	1	1	1	W5Q4B7	W5Q4B7 [217-230]	0	2038.11	14	1.33503e+06	1.19002e+06	1.52498e+06	1.46515e+06	1.62659e+06	1.39731e+06		2	1019.56	3.498e-05	3.27
[K].EQFLDGDGWTER.[W]	1xTMT6plex [N-Term]	1	1	20	W5PJG7	W5PJG7 [25-36]	0	1681.8	12	9.39431e+06	8.37878e+06	1.1208e+07	8.61594e+06	1.03059e+07	8.75254e+06		2	841.407	3.226e-06	2.66
[R].LEEELGQLK.[A]	1xTMT6plex [K9]; 1xTMT6plex [N-Term]	1	1	3	W5Q7E0	W5Q7E0 [364-372]	0	1516.9	9	2.35626e+06	2.05847e+06	3.14389e+06	1.7879e+06	2.12974e+06	2.07909e+06		2	758.952	6.007e-05	2.92
[R].NQIISATTSNANIVLQNDNAR.[L]	1xDeamidated [N]; 1xTMT6plex [N-Term]	1	2	19	B0LKN9	B0LKN9 [147-167]	0	2487.3	21	1.68134e+07	15049218	1.88849e+07	1.93115e+07	2.20274e+07	2.01193e+07		2	1244.15	6.144e-11	5.87
[R].NQIISATTSNANIVLQNDNAR.[L]	2xDeamidated [N/Q]; 1xTMT6plex [N-Term]	1	2	6	B0LKN9	B0LKN9 [147-167]	0	2488.28	21	5.26991e+06	4.65328e+06	5.84721e+06	5.97713e+06	6.7851e+06	6.50036e+06		3	830.103	1.017e-05	5.49
[R].EQEAGLLQFLR.[L]	1xTMT6plex [N-Term]	1	1	1	W5NU44	W5NU44 [207-217]	0	1532.86	11							No Quan Values	2	766.931	9.321e-05	2.48
[R].NQLTAMSSVLAK.[A]	1xTMT6plex [K12]; 1xTMT6plex [N-Term]	1	1	2	W5NRL8	W5NRL8 [505-516]	0	1721	12	3.18943e+06	2.98977e+06	3.54438e+06	3.69711e+06	4.27888e+06	4.03006e+06		2	861.003	9.905e-06	4.12
[K].EQADFALEALAK.[A]	1xTMT6plex [K12]; 1xTMT6plex [N-Term]	2	2	12	W5PWH2; W5QBQ9	W5PWH2 [398-409]; W5QBQ9 [410-421]	0	1763.99	12	3.07067e+07	2.9009e+07	3.31745e+07	4.23862e+07	5.14852e+07	4.5519e+07	Shared	2	882.496	3.532e-07	4.77
[K].EQADFAVEALAK.[A]	1xTMT6plex [K12]; 1xTMT6plex [N-Term]	2	3	18	W5PGT5; W5NU63	W5PGT5 [424-435]; W5NU63 [415-426]	0	1749.98	12	4.69263e+07	4.95088e+07	5.02728e+07	2.63136e+07	2.6999e+07	2.6189e+07	Shared	2	875.492	2.327e-07	2.68
[R].EQADNALEK.[Y]	1xTMT6plex [K9]; 1xTMT6plex [N-Term]	1	1	6	W5QH50	W5QH50 [173-181]	0	1475.81	9	3.57416e+06	2.93248e+06	3.67619e+06	5021856	5.90268e+06	4.65341e+06		2	738.408	0.0001132	3.45
[K].NQVAMNPTNTIFDAK.[R]	1xDeamidated [N9]; 1xTMT6plex [K15]; 1xTMT6plex [N-Term]	1	1	2	W5NSB0	W5NSB0 [58-72]	0	2123.12	15	1.7887e+06	1.81269e+06	1.93015e+06	2.25003e+06	2.99387e+06	2.64765e+06		2	1062.07	9.106e-06	3.18
[R].EQAGGDATENFEDVGHSTDAR.[E]	1xTMT6plex [N-Term]	1	1	2	C9E8M7	C9E8M7 [53-73]	0	2435.09	21	54250.3	42552.2	40413.4	52541.3	32299.1	40818.4		3	812.367	1.269e-06	3.31
[R].EQAGGDATENFEDVGHSTDAR.[E]	1xDeamidated [N10]; 1xTMT6plex [N-Term]	1	1	1	C9E8M7	C9E8M7 [53-73]	0	2436.07	21	22528.8	12173.9	14981.7	15834.4	17276.8	17523		3	812.704	3.174e-06	3.07
[K].LEEDISSSMTNSTAASRPPVTLR.[L]	1xDeamidated [N11]; 1xTMT6plex [N-Term]	1	1	3	W5Q4P4	W5Q4P4 [79-101]	0	2692.37	23	3.09608e+06	2947292	3.44783e+06	3.76796e+06	3.91764e+06	3.45474e+06		3	898.126	1.888e-06	4.13
[K].NQVALNPQNTVFDAK.[R]	1xDeamidated [N1]; 1xTMT6plex [K15]; 1xTMT6plex [N-Term]	1	5	5	W5PG95	W5PG95 [59-73]	0	2118.16	15	6.66616e+06	6.69488e+06	7.45115e+06	8.22998e+06	9.10605e+06	8.81352e+06		2	1059.58	8.502e-07	3.54
[K].NQVALNPQNTVFDAK.[R]	1xTMT6plex [K15]; 1xTMT6plex [N-Term]	1	5	7	W5PG95	W5PG95 [59-73]	0	2117.18	15	1.00864e+07	1.02677e+07	1.06753e+07	1.1628e+07	1.44456e+07	1.31053e+07		2	1059.08	8.665e-09	4.64
[K].NQTAEKEEFEHQQK.[E]	2xTMT6plex [K6; K14]; 1xTMT6plex [N-Term]	1	2	20	W5NPN4	W5NPN4 [585-598]	1	2433.3	14	4.77302e+07	4.6621e+07	5.20245e+07	4.99993e+07	6.26003e+07	5.10571e+07		3	811.767	6.526e-07	4.36
[R].NQSFCPTVNLDK.[L]	1xCarbamidomethyl [C5]; 1xTMT6plex [K12]; 1xTMT6plex [N-Term]	1	1	7	W5NQC8	W5NQC8 [66-77]	0	1880.99	12	5.30587e+06	5.03026e+06	5.69301e+06	5.56959e+06	6.98007e+06	6.13171e+06		2	940.995	4.913e-05	4.24
[K].NQVAMNPTNTVFDAK.[R]	1xDeamidated [N]; 1xTMT6plex [K15]; 1xTMT6plex [N-Term]	1	1	4	W5NPN4	W5NPN4 [57-71]	0	2109.11	15	3.80984e+06	3.42501e+06	4.3952e+06	3.82633e+06	4.61213e+06	4.35182e+06		2	1055.05	1.822e-07	4.42
[K].EQAPDSVEGLLNALR.[F]	1xTMT6plex [N-Term]	1	1	3	W5Q4P9	W5Q4P9 [289-303]	0	1841	15	1.11224e+06	990440	1.32848e+06	1.49658e+06	1.4705e+06	2.13627e+06		3	614.332	1.023e-05	4.93
[K].LEEEDEDQEDGESGCTFLVGLIQK.[H]	1xCarbamidomethyl [C15]; 1xTMT6plex [K24]; 1xTMT6plex [N-Term]	1	2	4	A8IF71	A8IF71 [391-414]	0	3198.54	24	493228	479599	561236	705238	578998	663977		3	1066.85	4.726e-06	4.17
[K].EQAVQGDAEGLQR.[Q]	1xTMT6plex [N-Term]	1	1	5	W5NUY7	W5NUY7 [1047-1059]	0	1629.84	13	358090	329011	323058	437856	403182	350195		2	815.426	2.905e-05	2.31
[R].LEEEEDRGQQLQAER.[K]	1xTMT6plex [N-Term]	1	2	4	W5PGT5	W5PGT5 [940-954]	1	2059.03	15	2.20917e+06	2.09776e+06	2.42589e+06	1.76945e+06	1.58928e+06	1.64503e+06		3	687.013	5.148e-06	2.5
[K].KGIVDQSQQAYQEAFEISK.[K]	2xDeamidated [Q9; Q12]; 2xTMT6plex [K1; K19]; 1xTMT6plex [N-Term]	1	5	1	W5QBD7	W5QBD7 [141-159]	1	2858.54	19	1.02059e+06	885076	1156241	949886	1.2276e+06	1.12145e+06		3	953.522	4.485e-06	4.84
[K].NQNSWGTGEDVK.[V]	1xDeamidated [N]; 1xTMT6plex [K12]; 1xTMT6plex [N-Term]	1	1	4	W5Q9T3	W5Q9T3 [517-528]	0	1793.91	12	1.72134e+06	1.73055e+06	1.66903e+06	1.28191e+06	1450161	1.38472e+06		2	897.458	5.025e-05	2.85
[K].KGIVDQSQQAYQEAFEISK.[K]	1xDeamidated [Q9]; 2xTMT6plex [K1; K19]; 1xTMT6plex [N-Term]	1	5	1	W5QBD7	W5QBD7 [141-159]	1	2857.56	19	1.55762e+06	1415322	1.64602e+06	1.08026e+06	1.31633e+06	1.21397e+06		3	953.188	2.662e-06	4.79
[R].EQDAVDQVK.[V]	1xTMT6plex [K9]; 1xTMT6plex [N-Term]	1	1	18	W5Q530	W5Q530 [322-330]	0	1489.83	9	2.38648e+07	2.15382e+07	2.68946e+07	3.59266e+07	4.32446e+07	3.97514e+07		2	745.416	0.0001105	2.16
[K].KGIVDQSQQAYQEAFEISK.[K]	2xTMT6plex [K1; K19]; 1xTMT6plex [N-Term]	1	5	3	W5QBD7	W5QBD7 [141-159]	1	2856.57	19	3.4223e+06	3.43025e+06	3.82498e+06	3.15768e+06	3.85508e+06	3.43635e+06		3	952.857	1.382e-07	4.77
[R].EQDDLLVLLADQDQK.[I]	1xTMT6plex [K15]; 1xTMT6plex [N-Term]	1	1	3	W5Q2I7	W5Q2I7 [909-923]	0	2201.21	15	357965	363995	426385	392186	413701	387589		3	734.406	1.138e-05	3.48
[R].NQMAEKDEYEHK.[Q]	2xTMT6plex [K6; K12]; 1xTMT6plex [N-Term]	1	1	3	W5NSB0	W5NSB0 [587-598]	1	2209.15	12	4.26196e+06	3.83413e+06	4.33623e+06	5.11557e+06	6149445	5.7492e+06		3	737.059	1.916e-05	3.06
[K].NQLTSNPENTVFDAK.[R]	1xDeamidated [N]; 1xTMT6plex [K15]; 1xTMT6plex [N-Term]	1	1	5	W5PTR5	W5PTR5 [84-98]	0	2137.12	15	3.11715e+06	3.06408e+06	3.56773e+06	3.11714e+06	3.48953e+06	3.12535e+06		2	1069.06	9.394e-06	3.14
[R].EQAQAEGIPVEMVVVGDDSAFTVLK.[K]	1xTMT6plex [K25]; 1xTMT6plex [N-Term]	1	1	1	W5PSZ8	W5PSZ8 [123-147]	0	3090.64	25	81885	77132.6	91035.3	111836	80689.3	115024		3	1030.88	4.575e-06	3.46
[R].LEEALENLCER.[I]	1xCarbamidomethyl [C9]; 1xTMT6plex [N-Term]	1	1	2	W5Q826	W5Q826 [91-101]	0	1604.82	11	378329	317523	441895	363068	405073	369664		2	802.908	5.672e-05	3.74
[R].NSLCIENSCIAAHDK.[R]	2xCarbamidomethyl [C4; C9]; 1xDeamidated [N7]; 1xTMT6plex [K15]; 1xTMT6plex [N-Term]	1	1	1	W5Q0F3	W5Q0F3 [432-446]	0	2191.09	15	1.01444e+06	932630	1.08235e+06	1.25531e+06	1.39064e+06	1.23012e+06		3	731.038	4.351e-05	3.15
[K].KGSITSVQAIYVPADDLTDPAPATTFAHLDATTVLSR.[A]	1xTMT6plex [K1]; 1xTMT6plex [N-Term]	1	1	2	W5PEP7	W5PEP7 [351-387]	1	4301.31	37	5.83703e+06	4.53593e+06	6.32821e+06	7.26598e+06	8.25813e+06	7.52905e+06		4	1076.08	4.05e-07	2.18
[R].NTIEETGNLAEQAR.[S]	1xTMT6plex [N-Term]	1	1	10	W5QD08	W5QD08 [1123-1136]	0	1774.91	14	996281	865847	1.10644e+06	1.01657e+06	1.0829e+06	1.01819e+06		2	887.96	8.936e-07	2.8
[K].NTLAQTTETLR.[R]	1xTMT6plex [N-Term]	1	1	8	W5Q7Z7	W5Q7Z7 [1362-1372]	0	1476.82	11	1.42386e+07	1.45114e+07	1.64786e+07	1.96363e+07	2.23867e+07	2.04207e+07		2	738.911	3.739e-05	4.01
[R].ENPLLPEEEEQR.[A]	1xTMT6plex [N-Term]	1	2	9	W5PKL6	W5PKL6 [222-233]	0	1711.87	12	332002	293719	414414	349667	384929	369948		2	856.442	2.097e-05	3.12
[K].ENPSATLEDLEKPGVDEEPQHVLLR.[Y]	1xTMT6plex [K12]; 1xTMT6plex [N-Term]	1	1	1	W5PM50	W5PM50 [265-289]	0	3273.74	25	203151	172030	256950	269496	313353	269600		4	819.189	0.0001045	3.79
[R].NTGIEAPDYLATVDVNPK.[S]	1xTMT6plex [K18]; 1xTMT6plex [N-Term]	1	1	3	W5QIK8	W5QIK8 [35-52]	0	2375.29	18	5.05202e+06	3.71817e+06	5.57274e+06	4.68347e+06	4.82492e+06	4.22891e+06		2	1188.14	3.027e-07	4.65
[K].ENPVYTPLYFPEELHR.[R]	1xTMT6plex [N-Term]	1	2	1	A0A5J6SC24	A0A5J6SC24 [70-85]	0	2233.15	16	464711	391660	516261	510279	507478	493909		3	745.052	0.0001262	3.93
[K].KGTVACGQPPVVENAK.[T]	1xCarbamidomethyl [C6]; 1xDeamidated [Q8]; 2xTMT6plex [K1; K16]; 1xTMT6plex [N-Term]	1	2	1	W5Q233	W5Q233 [3270-3285]	1	2343.33	16	1.08889e+06	915678	1.02884e+06	1.78942e+06	1.73468e+06	1.79003e+06		3	781.784	9.814e-05	3.69
[R].NTFAEVTGLSPGVTYHFK.[V]	1xTMT6plex [K18]; 1xTMT6plex [N-Term]	1	2	3	W5QDG7	W5QDG7 [960-977]	0	2426.31	18	4.78409e+06	4.44839e+06	5.10574e+06	5.18145e+06	6.14905e+06	5.26729e+06		3	809.435	2.263e-06	4.2
[R].NTETEESLAK.[R]	1xTMT6plex [K10]; 1xTMT6plex [N-Term]	1	1	3	W5P8E4	W5P8E4 [159-168]	0	1579.86	10	1.2221e+06	1.12352e+06	1.38891e+06	1.2931e+06	1.50343e+06	1.42629e+06		2	790.432	3.513e-05	3.03
[R].ENQSILITGESGAGK.[T]	1xTMT6plex [K15]; 1xTMT6plex [N-Term]	6	7	14	W5PPG6; W5PWV8; W5PT09; W5PBN5; W5QDF3; W5PIU1	W5PPG6 [171-185]; W5PWV8 [171-185]; W5PT09 [171-185]; W5PBN5 [173-187]; W5QDF3 [170-184]; W5PIU1 [171-185]	0	1962.09	15	41502356	2.52537e+07	5.52424e+07	2.05625e+07	2.43101e+07	2.17711e+07	Shared	2	981.544	1.92e-08	4.62
[K].NTELAIFHGETELK.[N]	1xTMT6plex [K14]; 1xTMT6plex [N-Term]	1	1	2	W5PES1	W5PES1 [1126-1139]	0	2060.14	14	3.88178e+06	3.01926e+06	4.84218e+06	2.81879e+06	3.27435e+06	2711160		2	1030.57	7.045e-05	2.81
[K].IEEACEIYAR.[A]	1xCarbamidomethyl [C5]; 1xTMT6plex [N-Term]	1	1	3	W5PNM6	W5PNM6 [38-47]	0	1482.75	10	1.10744e+07	9955591	1.10092e+07	1.06417e+07	1.20791e+07	1.13669e+07		2	741.871	4.476e-05	3.01
[K].NTEAIGNEVTR.[L]	1xTMT6plex [N-Term]	1	1	2	W5Q3R1	W5Q3R1 [1488-1498]	0	1432.76	11	716318	588241	694921	708534	875799	797874		2	716.883	2.641e-05	3.58
[R].KGTENGVNGTVTSNGADSPR.[N]	3xDeamidated [N5; N8; N14]; 1xTMT6plex [K1]; 1xTMT6plex [N-Term]	1	1	2	W5P1B6	W5P1B6 [348-367]	1	2422.21	20	654650	556073	727335	631769	727686	711997		3	808.074	1.663e-05	3.23
[R].NTDQASMPENTVAQK.[L]	1xTMT6plex [K15]; 1xTMT6plex [N-Term]	1	1	6	W5NU63	W5NU63 [366-380]	0	2092.07	15	5.20348e+06	5.33626e+06	5.27561e+06	5.08204e+06	5.36837e+06	4.66318e+06		2	1046.55	7.728e-08	5.24
[R].LEEAGGATSAQIEMNK.[K]	1xTMT6plex [K16]; 1xTMT6plex [N-Term]	4	4	5	W5PPG6; W5PT09; W5PBN5; W5PIU1	W5PPG6 [1154-1169]; W5PT09 [1152-1167]; W5PBN5 [1157-1172]; W5PIU1 [1158-1173]	0	2107.11	16	6.34137e+06	4.40309e+06	6.56969e+06	4.75288e+06	5.52855e+06	5.143e+06	Shared	2	1054.05	3.657e-08	3.91
[R].ENSASQISQLEQQLSAK.[N]	1xDeamidated [N/Q]; 1xTMT6plex [K17]; 1xTMT6plex [N-Term]	1	1	2	W5PZ05	W5PZ05 [320-336]	0	2320.24	17	3.05487e+06	3.37617e+06	3.94419e+06	3.88495e+06	4.64223e+06	4.27157e+06		3	774.08	0.0001128	3.48
[R].NTDQASMPDNTAAQK.[VL]	2xDeamidated [N1; N10]; 1xTMT6plex [K15]; 1xTMT6plex [N-Term]	2	3	1	W5PGT5; W5PWH2	W5PGT5 [375-389]; W5PWH2 [349-363]	0	2052	15	269585	308432	245068	118281	121127	133828	Shared	2	1026.51	3.385e-05	2.77
[R].NTDQASMPDNTAAQK.[VL]	1xTMT6plex [K15]; 1xTMT6plex [N-Term]	2	3	10	W5PGT5; W5PWH2	W5PGT5 [375-389]; W5PWH2 [349-363]	0	2050.03	15	1.30129e+07	1.37652e+07	1.47128e+07	1.04552e+07	1.14485e+07	1.08438e+07	Shared	2	1025.51	7.923e-08	6.28
[K].NTAIGIDLGTTYSCVGVFQHGK.[V]	1xCarbamidomethyl [C14]; 1xDeamidated [Q19]; 1xTMT6plex [K22]; 1xTMT6plex [N-Term]	1	1	4	W5PG95	W5PG95 [6-27]	0	2797.46	22	1.95903e+06	1.67972e+06	2304945	2.42277e+06	3.0567e+06	2.62962e+06		3	933.159	1.305e-07	4.76
[K].ENSETVVTGSLDDLVK.[V]	1xTMT6plex [K16]; 1xTMT6plex [N-Term]	1	1	3	W5NRI5	W5NRI5 [30-45]	0	2164.17	16	664555	652954	780435	814126	861538	729403		2	1082.59	1.992e-07	2.8
[R].NSYVAGQYDDTASYER.[L]	1xTMT6plex [N-Term]	1	1	1	W5P285	W5P285 [105-120]	0	2067.95	16	131651	96138.2	122472	116831	106747	97668.2		2	1034.47	6.794e-06	3.15
[R].ENTAAESGSESSSQEATPEK.[E]	1xTMT6plex [K20]; 1xTMT6plex [N-Term]	1	1	1	W5P9Q4	W5P9Q4 [299-318]	0	2497.19	20	46452.2	41463.7	46165.6	66312.5	53995.5	74774.1		3	833.072	5.752e-06	2.58
[K].ENPGLTQDIIMK.[I]	1xTMT6plex [K12]; 1xTMT6plex [N-Term]	1	2	2	M4WXC5	M4WXC5 [54-65]	0	1817.02	12	3.18355e+06	3.03997e+06	3.55697e+06	3.87378e+06	4.8757e+06	4119898		2	909.01	2.011e-06	2.89
[K].NTLLVAGLQAR.[N]	1xTMT6plex [N-Term]	1	1	2	W5PGX0	W5PGX0 [245-255]	0	1384.85	11	5730243	4886960	6.43049e+06	5.78097e+06	6.91627e+06	6.09949e+06		2	692.924	6.468e-05	2.82
[R].KGTVLLADNVIFPGAPDFLEYVR.[G]	1xTMT6plex [K1]; 1xTMT6plex [N-Term]	1	1	2	W5QB25	W5QB25 [8-30]	1	2992.69	23	1.62291e+06	1.45444e+06	1.72601e+06	1.71242e+06	1.65654e+06	1.7453e+06		3	998.228	6.104e-08	5.07
[R].NTLQEANDILNNLK.[D]	1xDeamidated [N]; 1xTMT6plex [K14]; 1xTMT6plex [N-Term]	1	1	9	W5QD08	W5QD08 [1359-1372]	0	2059.14	14	2.36336e+07	2.3121e+07	2.45522e+07	2.38174e+07	2.77209e+07	2.35039e+07		2	1030.08	2.997e-06	4.08
[R].ENLISALEQAR.[K]	1xTMT6plex [N-Term]	1	1	1	W5PUE5	W5PUE5 [394-404]	0	1472.83	11	1.27963e+06	1.06988e+06	1.41056e+06	1.15565e+06	1.29276e+06	1.1728e+06		2	736.915	3.686e-05	3.87
[R].NTSNAAENDPPTVELQGLVPR.[G]	1xTMT6plex [N-Term]	1	1	13	W5QAR2	W5QAR2 [18-38]	0	2451.27	21	6.47921e+06	6.11089e+06	7.39621e+06	1.14491e+07	1.20279e+07	1.19759e+07		3	817.763	1.544e-07	4.18
[R].KGVAINFVK.[N]	2xTMT6plex [K1; K9]; 1xTMT6plex [N-Term]	1	1	2	W5NVU4	W5NVU4 [374-382]	1	1663.09	9	3.86429e+06	3.51924e+06	4.38345e+06	3.95378e+06	4.79866e+06	4.67294e+06		3	555.029	0.0001025	3.36
[K].NTSEQDQPMGGWEMIR.[K]	1xTMT6plex [N-Term]	1	1	6	W5Q9T3	W5Q9T3 [458-473]	0	2107.97	16	4.36506e+06	4.45449e+06	4.27595e+06	3.85877e+06	4.34409e+06	4.08874e+06		2	1054.49	4.737e-09	4.63
[K].NTSEFDVLVIGGGATGSGCALDAVTR.[G]	1xCarbamidomethyl [C19]; 1xDeamidated [N1]; 1xTMT6plex [N-Term]	1	1	1	W5PDN7	W5PDN7 [66-91]	0	2797.39	26	654254	562335	715683	791458	988420	791700		3	933.133	7.139e-06	3.46
[K].ENIQVFDFELTPEDMK.[A]	1xTMT6plex [K16]; 1xTMT6plex [N-Term]	2	5	3	W5PN69; W5PMM4	W5PN69 [279-294]; W5PMM4 [279-294]	0	2413.24	16	1.88834e+06	1.66526e+06	2.33593e+06	1.66335e+06	1.95199e+06	1.6832e+06	Shared	2	1207.12	1.371e-06	3.91
[K].ENIQVFDFELTPEDMK.[A]	1xOxidation [M15]; 1xTMT6plex [K16]; 1xTMT6plex [N-Term]	2	5	1	W5PN69; W5PMM4	W5PN69 [279-294]; W5PMM4 [279-294]	0	2429.23	16	98711.1	93687.8	162180	116033	112887	108201	Shared	3	810.415	4e-05	3.05
[R].NTQVVSDAAYK.[G]	1xTMT6plex [K11]; 1xTMT6plex [N-Term]	1	1	1	W5NQM1	W5NQM1 [811-821]	0	1653.92	11	998165	990012	1128363	1.70632e+06	1.75121e+06	1.55617e+06		2	827.467	6.46e-05	3.32
[R].NTQIIIQEESGIPK.[V]	1xTMT6plex [K14]; 1xTMT6plex [N-Term]	1	1	2	W5PR64	W5PR64 [412-425]	0	2028.17	14	1.21916e+06	1.23919e+06	1.40048e+06	1.57252e+06	1.75282e+06	1.67464e+06		2	1014.59	9.831e-07	2.29
[R].NTPEYEELCPR.[G]	1xCarbamidomethyl [C9]; 1xTMT6plex [N-Term]	1	1	13	W5QIN8	W5QIN8 [1002-1012]	0	1636.78	11	1.13792e+07	1.23259e+07	9.21522e+06	1.06162e+07	1.10475e+07	9.79981e+06		2	818.895	1.468e-05	3
[K].ENITEDEAK.[E]	1xTMT6plex [K9]; 1xTMT6plex [N-Term]	1	1	5	W5PX18	W5PX18 [134-142]	0	1506.81	9	1.6376e+06	1.66451e+06	1.97779e+06	1.41447e+06	1.92616e+06	1.60197e+06		2	753.909	6.305e-05	2.69
[R].KGTDVNVFTTILTTR.[S]	1xTMT6plex [K1]; 1xTMT6plex [N-Term]	1	1	6	W5PSZ5	W5PSZ5 [214-228]	1	2124.24	15	1.8566e+07	1.81123e+07	2.09753e+07	3.59578e+07	2.96266e+07	3.50889e+07		3	708.747	8.233e-07	4.2
[K].NTPAPFIETFPEDEEAAK.[A]	1xTMT6plex [K18]; 1xTMT6plex [N-Term]	1	1	5	W5PAX1	W5PAX1 [162-179]	0	2464.26	18	1.36989e+06	1.23584e+06	1.62309e+06	1.7973e+06	1.9595e+06	1.89735e+06		3	822.097	1.663e-07	3.67
[R].ENIVGDAMEVLR.[K]	1xTMT6plex [N-Term]	1	1	2	W5P440	W5P440 [716-727]	0	1574.84	12	698518	607119	778359	743498	881299	774906		2	787.923	9.657e-06	3.66
[K].NTNDANSCQIIIPQNQVNR.[K]	1xCarbamidomethyl [C8]; 2xDeamidated [N/Q]; 1xTMT6plex [N-Term]	2	4	4	C5IJ94; W5PE22	C5IJ94 [310-328]; W5PE22 [295-313]	0	2430.19	19	730010	618023	871691	760979	855968	812131	Shared	3	810.74	3.746e-06	4.32
[R].ENLWLNLTDGSILCGR.[R]	1xCarbamidomethyl [C14]; 1xDeamidated [N6]; 1xTMT6plex [N-Term]	1	1	1	W5P689	W5P689 [208-223]	0	2091.07	16	504295	416563	600691	574051	618889	556997		2	1046.05	7.784e-05	2.58
[R].ENMAALQSDPQQQELFR.[N]	1xTMT6plex [N-Term]	1	1	6	W5PLW6	W5PLW6 [668-684]	0	2234.11	17	5.94665e+06	5.23926e+06	6.43451e+06	6.48116e+06	7.65455e+06	6.5788e+06		2	1117.55	2.221e-07	3.58
[K].NTNDANSCQIIIPQNQVNR.[K]	1xCarbamidomethyl [C8]; 1xDeamidated [N]; 1xTMT6plex [N-Term]	2	4	6	C5IJ94; W5PE22	C5IJ94 [310-328]; W5PE22 [295-313]	0	2429.2	19	3.49423e+06	3.06422e+06	3.80417e+06	3.62903e+06	4.18796e+06	3.87574e+06	Shared	3	810.404	2.13e-06	3.79
[K].NTNDANSCQIIIPQNQVNR.[K]	1xCarbamidomethyl [C8]; 1xTMT6plex [N-Term]	2	4	6	C5IJ94; W5PE22	C5IJ94 [310-328]; W5PE22 [295-313]	0	2428.22	19	2.89349e+06	2.68698e+06	3.08639e+06	3.22659e+06	3.43484e+06	2.98975e+06	Shared	2	1214.61	8.84e-10	4.05
[R].NTISQSTSGDPETDKK.[I]	2xTMT6plex [K15; K16]; 1xTMT6plex [N-Term]	1	1	1	W5P328	W5P328 [521-536]	1	2395.29	16	479948	514541	445156	1118619	1.36623e+06	1.27765e+06		3	799.099	3.526e-05	3.74
[R].ENNAVYAFLGLTAPPGSK.[E]	1xTMT6plex [K18]; 1xTMT6plex [N-Term]	1	1	1	W5NSY8	W5NSY8 [72-89]	0	2307.27	18	824784	731842	920422	1.02533e+06	1.1084e+06	1.06501e+06		2	1154.13	7.306e-05	2.33
[K].ENNGIGILTLNNPSK.[M]	1xDeamidated [N]; 1xTMT6plex [K15]; 1xTMT6plex [N-Term]	1	1	7	W5PCU6	W5PCU6 [60-74]	0	2043.15	15	4.57587e+06	4.47572e+06	5.04005e+06	5.70667e+06	6.3112e+06	6.15952e+06		2	1022.07	5.423e-07	3.68
[K].ENNLSEEVLGK.[V]	1xTMT6plex [K11]; 1xTMT6plex [N-Term]	1	1	3	W5Q296	W5Q296 [725-735]	0	1689.94	11	1.77271e+06	1.51111e+06	1.91422e+06	1.72774e+06	2.12894e+06	1.91499e+06		2	845.477	8.418e-06	2.73
[K].ENNMDVGFGSGTR.[A]	1xTMT6plex [N-Term]	1	2	1	W5PQH2	W5PQH2 [925-937]	0	1612.76	13	555395	602853	557034	472348	518727	716329		2	806.881	2.484e-05	2.62
[R].ENIVEAIIHSPELIR.[V]	1xTMT6plex [N-Term]	1	1	7	W5PT14	W5PT14 [93-107]	0	1962.12	15	1.67409e+06	1.50708e+06	2.02363e+06	2.16607e+06	2.33839e+06	2.23825e+06		3	654.707	1.714e-06	5.17
[K].NSWGTSWGEDGYFR.[I]	1xDeamidated [N1]; 1xTMT6plex [N-Term]	1	1	1	W5P1H0	W5P1H0 [427-440]	0	1891.84	14	754847	639055	808256	883433	969349	940506		2	946.417	7.046e-06	3.35
[K].NSWGPEWGWNGYVK.[M]	1xDeamidated [N10]; 1xTMT6plex [K14]; 1xTMT6plex [N-Term]	1	1	3	W5PEY2	W5PEY2 [301-314]	0	2139.07	14	6.01134e+06	5704203	6.97667e+06	8120121	8.1539e+06	7.65181e+06		2	1070.03	1.155e-06	4.2
[R].NSWGGFASTQDTIVALK.[A]	1xDeamidated [Q10]; 1xTMT6plex [K17]; 1xTMT6plex [N-Term]	1	1	1	W5P8E9	W5P8E9 [1170-1186]	0	2254.21	17	980098	1.07333e+06	1.056e+06	1.09485e+06	1.19282e+06	1.13914e+06		2	1127.62	3.815e-05	2.53
[K].NSNVGLIQLNRPK.[A]	1xTMT6plex [K13]; 1xTMT6plex [N-Term]	1	2	9	W5NQC6	W5NQC6 [45-57]	0	1911.15	13	1.78435e+07	1.70011e+07	2.17084e+07	2.21357e+07	2.94722e+07	2.7782e+07		3	637.719	1.164e-07	4.39
[K].NSNPDEIEIDFETLKPSTLR.[E]	1xTMT6plex [K15]; 1xTMT6plex [N-Term]	1	1	2	W5P0E3	W5P0E3 [646-665]	0	2776.48	20	1.48305e+06	1289783	1.55006e+06	1.56933e+06	1.72601e+06	1.65941e+06		3	926.157	1.515e-08	4.46
[K].EPALLELEGK.[K]	1xTMT6plex [K10]; 1xTMT6plex [N-Term]	1	2	7	W5QG16	W5QG16 [315-324]	0	1556.93	10	6.8639e+06	6.41457e+06	7.99007e+06	8.52684e+06	1.02545e+07	9.57628e+06		2	778.968	3.452e-05	3.44
[K].EPALNEANLSNLK.[A]	1xTMT6plex [K13]; 1xTMT6plex [N-Term]	1	1	6	W5QD49	W5QD49 [46-58]	0	1871.06	13	4.94431e+06	5.02656e+06	5.94206e+06	6.65538e+06	8.03129e+06	6.46612e+06		2	936.032	8.641e-08	3.76
[K].EPALNEANLSNLK.[A]	1xDeamidated [N8]; 1xTMT6plex [K13]; 1xTMT6plex [N-Term]	1	1	1	W5QD49	W5QD49 [46-58]	0	1872.05	13	692999	606899	811312	821566	889495	870464		3	624.691	0.0001128	2.7
[K].NSNPALNDNLEK.[G]	1xDeamidated [N]; 1xTMT6plex [K12]; 1xTMT6plex [N-Term]	1	1	11	W5P610	W5P610 [129-140]	0	1787.95	12	4.34632e+06	3.70645e+06	4.97525e+06	4.52403e+06	5.42489e+06	5.15738e+06		2	894.479	3.357e-06	3.32
[K].NSNPALNDNLEK.[G]	1xTMT6plex [K12]; 1xTMT6plex [N-Term]	1	1	8	W5P610	W5P610 [129-140]	0	1786.97	12	1.53946e+07	1.56542e+07	1.75281e+07	1.73439e+07	1.97168e+07	1.62441e+07		2	893.984	4.049e-06	2.79
[K].NSNILEDLETLR.[L]	1xTMT6plex [N-Term]	1	1	2	W5PLQ6	W5PLQ6 [73-84]	0	1645.9	12	430702	381775	441967	359345	405733	357038		2	823.453	1.837e-06	3.32
[K].NSIYSGLEAFGDVK.[L]	1xDeamidated [N1]; 1xTMT6plex [K14]; 1xTMT6plex [N-Term]	1	1	1	W5PFV0	W5PFV0 [338-351]	0	1959.05	14	780650	629114	929836	1064372	1.15743e+06	1.10848e+06		2	980.021	6.052e-07	4.48
[K].EPCGGLEDAVNEAK.[H]	1xCarbamidomethyl [C3]; 1xTMT6plex [K14]; 1xTMT6plex [N-Term]	1	1	9	W5PTE9	W5PTE9 [167-180]	0	1946.99	14	1.89043e+06	1.88271e+06	1.74864e+06	2.23653e+06	2.5244e+06	2.10295e+06		3	649.665	4.831e-05	3.99
[K].NSIYSGLEAFGDVK.[L]	1xTMT6plex [K14]; 1xTMT6plex [N-Term]	1	1	2	W5PFV0	W5PFV0 [338-351]	0	1958.06	14	2.09977e+06	2.12486e+06	2.39974e+06	3.31837e+06	4.00267e+06	3.7237e+06		2	979.537	5.727e-06	3.3
[K].EPACDDPDTEQAALAAVDYINK.[H]	1xCarbamidomethyl [C4]; 1xDeamidated [Q11]; 1xTMT6plex [K22]; 1xTMT6plex [N-Term]	1	2	3	W5QH56	W5QH56 [88-109]	0	2865.39	22	1.12321e+06	970671	1.0833e+06	852878	926300	807211		3	955.804	5.558e-05	4.06
[R].LEEAGGATSAQIEMNK.[K]	1xOxidation [M14]; 1xTMT6plex [K16]; 1xTMT6plex [N-Term]	4	4	3	W5PPG6; W5PT09; W5PBN5; W5PIU1	W5PPG6 [1154-1169]; W5PT09 [1152-1167]; W5PBN5 [1157-1172]; W5PIU1 [1158-1173]	0	2123.11	16	3.85442e+06	3.46858e+06	5.34577e+06	4.09086e+06	5.12116e+06	3.98156e+06	Shared	3	708.369	1.636e-05	3.65
[R].NSLLDDPYWSEDLR.[V]	1xTMT6plex [N-Term]	1	1	2	W5Q366	W5Q366 [173-186]	0	1951.96	14	1.49998e+06	1.58333e+06	1.49524e+06	1.46457e+06	1.44822e+06	1.37883e+06		2	976.479	1.369e-06	4.04
[R].NSILAQVLDQSAR.[A]	1xTMT6plex [N-Term]	1	1	3	W5P225	W5P225 [41-53]	0	1643.93	13	6.38913e+06	5.32097e+06	6.29433e+06	5.80531e+06	6.72826e+06	5.84688e+06		2	822.462	3.005e-05	2.38
[R].NSLLAGGDDDTMSVISGISSR.[G]	1xTMT6plex [N-Term]	1	1	1	W5PWT5	W5PWT5 [1048-1068]	0	2324.16	21	426876	460483	607857	550734	623038	600083		3	775.384	3.534e-06	4.21
[K].NSLESYAFNMK.[A]	1xDeamidated [N1]; 1xTMT6plex [K11]; 1xTMT6plex [N-Term]	1	2	3	W5NPN4	W5NPN4 [541-551]	0	1762.91	11	3.10698e+06	2.44935e+06	3.40984e+06	3103010	3.37054e+06	3.31023e+06		2	881.952	0.0001192	3.78
[K].NSLESYAFNMK.[A]	1xTMT6plex [K11]; 1xTMT6plex [N-Term]	1	2	6	W5NPN4	W5NPN4 [541-551]	0	1761.92	11	2.36798e+07	2.09134e+07	2.59009e+07	2.4464e+07	3.02049e+07	2.61786e+07		2	881.462	1.137e-05	3.71
[R].NSLEILLGSIGR.[S]	1xTMT6plex [N-Term]	1	1	1	W5NTC4	W5NTC4 [109-120]	0	1500.89	12	798343	686846	841724	884722	981053	903159		2	750.945	3.427e-05	1.52
[K].NSLDCEIVSAK.[S]	1xCarbamidomethyl [C5]; 1xDeamidated [N1]; 1xTMT6plex [K11]; 1xTMT6plex [N-Term]	1	2	6	W5QG16	W5QG16 [420-430]	0	1694.9	11	3.28213e+06	2.81346e+06	3.54767e+06	3.72638e+06	4.2395e+06	4.17442e+06		2	847.954	6.832e-06	3.52
[R].EPEVLSTMAIIVNK.[L]	1xTMT6plex [K14]; 1xTMT6plex [N-Term]	1	1	4	W5QG19	W5QG19 [798-811]	0	2002.17	14	7.55383e+06	6.78328e+06	8.55093e+06	8.91517e+06	9.63471e+06	8.73738e+06		2	1001.58	9.698e-06	3.11
[K].NSLDCEIVSAK.[S]	1xCarbamidomethyl [C5]; 1xTMT6plex [K11]; 1xTMT6plex [N-Term]	1	2	8	W5QG16	W5QG16 [420-430]	0	1693.92	11	17507369	1.69943e+07	1.95698e+07	2.26702e+07	2.57664e+07	2.37789e+07		2	847.459	2.931e-06	4.15
[K].NSLCPSGGNVISNLFK.[E]	1xCarbamidomethyl [C4]; 1xDeamidated [N1]; 1xTMT6plex [K16]; 1xTMT6plex [N-Term]	1	2	2	W5NYZ6	W5NYZ6 [172-187]	0	2166.16	16	2.44199e+06	2.62301e+06	2.89037e+06	2.93121e+06	3479813	3.10189e+06		2	1083.58	7.818e-07	4.08
[K].NSLCPSGGNVISNLFK.[E]	1xCarbamidomethyl [C4]; 1xTMT6plex [K16]; 1xTMT6plex [N-Term]	1	2	6	W5NYZ6	W5NYZ6 [172-187]	0	2165.18	16	7.28903e+06	7.97361e+06	7.91686e+06	7.85694e+06	9.13487e+06	7.92694e+06		2	1083.08	5.708e-09	5.16
[R].NSLSYDCIGR.[L]	1xCarbamidomethyl [C7]; 1xTMT6plex [N-Term]	1	1	2	W5PFV0	W5PFV0 [126-135]	0	1413.7	10	1.22646e+06	1.13778e+06	1.31683e+06	1.54731e+06	1.78022e+06	1.63314e+06		2	707.351	0.000115	2.42
[R].NQGGYGGSSSSSSYGSGR.[R]	1xTMT6plex [N-Term]	1	5	1	W5P4X4	W5P4X4 [301-318]	0	1923.86	18	160270	302420	272202	244112	180848	140054		2	962.431	1.496e-11	4.42
[K].EPACDDPDTEQAALAAVDYINK.[H]	1xCarbamidomethyl [C4]; 1xTMT6plex [K22]; 1xTMT6plex [N-Term]	1	2	9	W5QH56	W5QH56 [88-109]	0	2864.4	22	4.1697e+06	3.7463e+06	3.81903e+06	2.04182e+06	1.89214e+06	1.60054e+06		2	1432.7	2.103e-08	3.61
[R].EPAAETEALLGMDLVR.[L]	1xTMT6plex [N-Term]	1	1	2	W5PG20	W5PG20 [116-131]	0	1944.03	16	213434	151398	226568	295904	289420	310979		2	972.518	1.147e-07	3.56
[K].NSVSQISVLSGGK.[A]	1xTMT6plex [K13]; 1xTMT6plex [N-Term]	1	1	3	W5QBL7	W5QBL7 [319-331]	0	1734.02	13	5.52581e+06	5.43244e+06	6.23625e+06	6.57162e+06	7.74137e+06	7.31378e+06		2	867.508	1.005e-05	4.69
[K].NSSYFVEWIPNNVK.[TV]	1xDeamidated [N]; 1xTMT6plex [K14]; 1xTMT6plex [N-Term]	6	9	7	W5NSS8; W5Q039; W5PPT6; W5NUI0; W5P669; D0VWY9	W5NSS8 [319-332]; W5Q039 [337-350]; W5PPT6 [337-350]; W5NUI0 [263-276]; W5P669 [280-293]; D0VWY9 [337-350]	0	2156.14	14	1.72712e+07	1.52108e+07	1.90501e+07	1.82191e+07	1.88253e+07	1.80755e+07	Shared	2	1078.57	4.289e-06	4.54
[K].ENTLNQLVGAAFGAAGQR.[C]	1xTMT6plex [N-Term]	1	1	5	W5NS43	W5NS43 [300-317]	0	2046.09	18	4.01502e+06	3.80058e+06	4.69841e+06	5.6428e+06	6.94996e+06	6.49725e+06		2	1023.54	4.54e-09	5.86
[K].NSSYFVEWIPNNVK.[TV]	1xTMT6plex [K14]; 1xTMT6plex [N-Term]	6	9	5	W5NSS8; W5Q039; W5PPT6; W5NUI0; W5P669; D0VWY9	W5NSS8 [319-332]; W5Q039 [337-350]; W5PPT6 [337-350]; W5NUI0 [263-276]; W5P669 [280-293]; D0VWY9 [337-350]	0	2155.16	14	3.33154e+07	3.03274e+07	3.50238e+07	3.52836e+07	3.63534e+07	3.17108e+07	Shared	2	1078.07	3.977e-06	3.59
[K].ENTPLLNCARPDQDVK.[F]	1xCarbamidomethyl [C8]; 1xTMT6plex [K16]; 1xTMT6plex [N-Term]	1	1	1	W5P5Z2	W5P5Z2 [94-109]	0	2328.24	16	1.19011e+06	1.05169e+06	1.27131e+06	1575329	1.65676e+06	1560775		3	776.746	1.667e-05	3.72
[K].NSSDKDQSLGNWR.[I]	1xTMT6plex [K5]; 1xTMT6plex [N-Term]	1	1	2	W5PW39	W5PW39 [408-420]	1	1965.02	13	4.16232e+06	4.41154e+06	4466223	3.59969e+06	4.14884e+06	3.81543e+06		3	655.675	8.65e-05	3.52
[K].NSRPEANEALER.[G]	1xTMT6plex [N-Term]	1	1	7	W5P8X9	W5P8X9 [131-142]	0	1614.84	12	6.09716e+06	6.1237e+06	7.28157e+06	7.31266e+06	8.52728e+06	7.82569e+06		3	538.952	9.057e-05	4.99
[K].ENVDYLIQELR.[R]	1xTMT6plex [N-Term]	1	1	1	W5QHW1	W5QHW1 [77-87]	0	1620.88	11	388344	357972	360758	343824	339667	312966		2	810.943	3.975e-05	2.88
[R].KGTDIMYTGTLDCWR.[K]	1xCarbamidomethyl [C13]; 1xTMT6plex [K1]; 1xTMT6plex [N-Term]	1	2	3	B2MVW9	B2MVW9 [245-259]	1	2275.16	15	1.10427e+07	1.08206e+07	1.20785e+07	1.206e+07	1.5006e+07	1.46765e+07		3	759.056	7.102e-05	3.16
[R].ENVFLSYQDK.[R]	1xTMT6plex [K10]; 1xTMT6plex [N-Term]	1	1	7	W5PDN1	W5PDN1 [73-82]	0	1700.93	10	8.06775e+06	7.12741e+06	8.32142e+06	9.36692e+06	1.02784e+07	9.54056e+06		2	850.962	0.0001168	3.56
[K].ENVLLSSELQR.[Q]	1xTMT6plex [N-Term]	1	2	8	W5PUF4	W5PUF4 [696-706]	0	1516.85	11	4.631e+06	4.94427e+06	4.96483e+06	3.27712e+06	3.46392e+06	3.18419e+06		2	758.928	6.933e-06	3.4
[K].KGTDFNLNELK.[G]	2xTMT6plex [K1; K11]; 1xTMT6plex [N-Term]	1	1	9	W5PF65	W5PF65 [121-131]	1	1966.16	11	2.08257e+08	139219478	2.32741e+08	1.35987e+08	163395219	1.33035e+08		3	656.054	9.433e-06	4.03
[K].NSQLEQENNLLK.[T]	1xTMT6plex [K12]; 1xTMT6plex [N-Term]	1	1	2	W5PCD1	W5PCD1 [88-99]	0	1888.05	12	3.70426e+06	3.62416e+06	3.9311e+06	4.03927e+06	4.60364e+06	3.68949e+06		2	944.524	4.492e-06	2.25
[K].ENVPPGPEVCISYPDGEK.[V]	1xCarbamidomethyl [C10]; 1xTMT6plex [K18]; 1xTMT6plex [N-Term]	1	1	3	W5Q8V2	W5Q8V2 [307-324]	0	2445.24	18	1.46342e+06	1.47475e+06	1.69008e+06	1.52944e+06	1.6262e+06	1.52958e+06		3	815.751	0.0001289	3.41
[R].LEEAGGATSAQIEMNK.[K]	1xDeamidated [Q11]; 1xTMT6plex [K16]; 1xTMT6plex [N-Term]	4	4	2	W5PPG6; W5PT09; W5PBN5; W5PIU1	W5PPG6 [1154-1169]; W5PT09 [1152-1167]; W5PBN5 [1157-1172]; W5PIU1 [1158-1173]	0	2108.09	16	1.61566e+06	583571	1.61465e+06	468155	388256	402483	Shared	2	1054.55	2.47e-06	3.91
[R].NSQGSEMFGDDDKR.[K]	1xDeamidated [N/Q]; 1xTMT6plex [K13]; 1xTMT6plex [N-Term]	1	1	6	W5Q7Z7	W5Q7Z7 [539-552]	1	2044.96	14	4.18985e+06	2680481	3.25731e+06	3.66733e+06	4.33103e+06	4.09866e+06		3	682.323	4.631e-06	4.64
[R].NSQGSEMFGDDDKR.[K]	1xTMT6plex [K13]; 1xTMT6plex [N-Term]	1	1	7	W5Q7Z7	W5Q7Z7 [539-552]	1	2043.98	14	1.7485e+07	1.71011e+07	1.73963e+07	2.65728e+07	3.3647e+07	2.86402e+07		3	681.997	1.098e-07	5.02
[R].NSQGSEMFGDDDK.[R]	1xTMT6plex [K13]; 1xTMT6plex [N-Term]	1	1	15	W5Q7Z7	W5Q7Z7 [539-551]	0	1887.88	13	8.26132e+06	7.8386e+06	7.75921e+06	1.15955e+07	1.45951e+07	1.3287e+07		2	944.438	1.04e-08	4.41
[K].NSQGEEVAQR.[S]	1xTMT6plex [N-Term]	1	1	7	W5Q9T3	W5Q9T3 [533-542]	0	1346.69	10	4.67828e+06	4902682	4.64882e+06	3.48384e+06	4.191e+06	5.07085e+06		2	673.848	7.037e-05	2.7
[K].NSQEDSEDSEEKDVK.[T]	2xTMT6plex [K12; K15]; 1xTMT6plex [N-Term]	1	1	5	W5P2B2	W5P2B2 [53-67]	1	2426.21	15	3.91306e+06	4.25469e+06	4.26168e+06	4.20594e+06	5.08295e+06	3.96014e+06		3	809.409	9.42e-06	3.52
[K].ENYAELLDDGFLK.[N]	1xTMT6plex [K13]; 1xTMT6plex [N-Term]	1	1	26	W5PTE9	W5PTE9 [783-795]	0	1985.06	13	3.64753e+07	3.65506e+07	3.4334e+07	3.48867e+07	3.82427e+07	3.25447e+07		2	993.033	3.449e-07	4.63
[K].ENYAELLDDGFLK.[N]	1xDeamidated [N2]; 1xTMT6plex [K13]; 1xTMT6plex [N-Term]	1	1	4	W5PTE9	W5PTE9 [783-795]	0	1986.05	13	488115	466093	526623	1.09524e+06	1.15269e+06	1.04358e+06		2	993.53	9.869e-07	2.93
[K].NSPGSFICECSSESTLDPTK.[T]	2xCarbamidomethyl [C8; C10]; 1xTMT6plex [K20]; 1xTMT6plex [N-Term]	1	1	4	W5QIN8	W5QIN8 [823-842]	0	2674.27	20	3.05765e+06	3.15348e+06	3.2886e+06	4.01026e+06	4.53112e+06	3.86534e+06		3	892.092	1.346e-05	4.11
[K].ENYLIQDAEEIVCK.[D]	1xCarbamidomethyl [C13]; 1xTMT6plex [K14]; 1xTMT6plex [N-Term]	1	1	4	D6PZY4	D6PZY4 [830-843]	0	2182.15	14	196201	148997	205977	329428	307002	253996		3	728.051	2.052e-05	2.44
[R].NSQGSEMFGDDDKRK.[M]	2xTMT6plex [K13; K15]; 1xTMT6plex [N-Term]	1	1	7	W5Q7Z7	W5Q7Z7 [539-553]	2	2401.24	15	3.92326e+07	3.99984e+07	4.35057e+07	44356160	4.77936e+07	4.54543e+07		4	601.063	9.902e-06	4.97
[R].NTTGVTEEALK.[E]	1xTMT6plex [K11]; 1xTMT6plex [N-Term]	1	1	3	W5NV97	W5NV97 [83-93]	0	1620.92	11	3.27728e+06	3.40453e+06	4.75688e+06	3.36625e+06	4.13247e+06	3495459		2	810.965	8.778e-05	3.47
[R].NQGFDVVLVDTAGR.[M]	1xTMT6plex [N-Term]	1	1	2	W5PS58	W5PS58 [514-527]	0	1719.92	14	1.03401e+06	1.13519e+06	1.55584e+06	1.0908e+06	1.29346e+06	1.41417e+06		2	860.457	2.693e-05	2.88
[K].NQFETEINITK.[T]	1xTMT6plex [K11]; 1xTMT6plex [N-Term]	1	1	2	W5Q7Z7	W5Q7Z7 [1312-1322]	0	1795	11	1.79462e+06	1.71463e+06	1.8991e+06	2.14534e+06	2.60573e+06	2.24423e+06		2	897.999	1.73e-05	4.26
[R].LEELDADKAEMR.[A]	1xTMT6plex [K8]; 1xTMT6plex [N-Term]	1	1	2	W5P0F8	W5P0F8 [198-209]	1	1878	12	607915	502120	631883	559944	624293	601216		3	626.672	8.187e-05	3.34
[K].EQYATSLAQSEAELK.[Q]	1xDeamidated [Q9]; 1xTMT6plex [K15]; 1xTMT6plex [N-Term]	1	1	2	W5QFK2	W5QFK2 [3766-3780]	0	2127.12	15	2599752	2.67443e+06	2.77777e+06	3.17811e+06	3.31684e+06	2.81992e+06		3	709.716	4.764e-05	3.58
[K].NNASTDYDLSDK.[SN]	1xDeamidated [N]; 1xTMT6plex [K12]; 1xTMT6plex [N-Term]	1	2	12	W5Q4S3	W5Q4S3 [301-312]	0	1801.89	12	4.11332e+06	3.4846e+06	4.3222e+06	3.61135e+06	3.84792e+06	3.68847e+06		2	901.444	2.838e-07	4
[K].NNASTDYDLSDK.[SN]	1xTMT6plex [K12]; 1xTMT6plex [N-Term]	1	2	23	W5Q4S3	W5Q4S3 [301-312]	0	1800.9	12	2.59965e+07	2.47334e+07	2.75795e+07	2.68112e+07	2.89848e+07	2.59795e+07		2	900.952	4.849e-07	3.72
[R].EQYEEEQEAK.[A]	1xTMT6plex [K10]; 1xTMT6plex [N-Term]	3	3	2	W5PPG6; W5PWV8; W5PIU1	W5PPG6 [1345-1354]; W5PWV8 [1340-1349]; W5PIU1 [1356-1365]	0	1740.87	10	578434	273483	865799	366189	235253	252945	Shared	2	870.938	6.93e-06	3.52
[R].EQYEEEQEGK.[A]	1xTMT6plex [K10]; 1xTMT6plex [N-Term]	2	2	6	W5P8Z5; W5PBN5	W5P8Z5 [1347-1356]; W5PBN5 [1345-1354]	0	1726.85	10	5.93142e+06	1.92056e+06	7.78004e+06	1.19978e+06	1.25454e+06	1.3914e+06	Shared	2	863.929	6.314e-06	3.7
[R].EQYEEEQESK.[A]	1xTMT6plex [K10]; 1xTMT6plex [N-Term]	1	1	8	W5PT09	W5PT09 [1342-1351]	0	1756.86	10	3.94054e+06	2.11441e+06	3.51608e+06	1.66194e+06	1.79052e+06	1.96825e+06		2	878.936	7.689e-06	2.47
[R].EQYEEETEAK.[A]	1xTMT6plex [K10]; 1xTMT6plex [N-Term]	1	2	3	W5QDF3	W5QDF3 [1345-1354]	0	1713.86	10	851359	685014	3.22484e+06	1.01316e+06	711437	806701		2	857.432	9.558e-06	3.16
[R].EQYGQYSLAVR.[G]	1xTMT6plex [N-Term]	1	1	3	W5P9B0	W5P9B0 [228-238]	0	1542.81	11	7.48388e+06	6.9966e+06	8.43171e+06	8.31623e+06	8.81485e+06	7.83865e+06		2	771.905	9.669e-05	3.06
[K].NNALNQVVLWDK.[I]	1xTMT6plex [K12]; 1xTMT6plex [N-Term]	1	1	3	W5PA30	W5PA30 [49-60]	0	1872.07	12	6040358	5.56378e+06	6.33698e+06	6.06638e+06	6.83566e+06	6.58075e+06		2	936.535	2.378e-05	3.95
[K].NMYEEEINETR.[R]	1xTMT6plex [N-Term]	1	1	7	W5Q9T3	W5Q9T3 [210-220]	0	1656.77	11	989021	1.18678e+06	1.40975e+06	1.27105e+06	892827	778792		2	828.885	1.288e-06	3.32
[K].NMQNVEHVPLSLDR.[A]	1xTMT6plex [N-Term]	1	1	3	W5P500	W5P500 [185-198]	0	1880.98	14	3.13364e+06	3.2199e+06	3.20263e+06	3.46627e+06	3.75856e+06	3.68045e+06		3	627.663	3.409e-06	5.52
[R].ERDVYEELLTQAEIQGNINK.[V]	1xTMT6plex [K20]; 1xTMT6plex [N-Term]	1	1	3	W5PU66	W5PU66 [336-355]	1	2820.51	20	1.45968e+06	1.38915e+06	1.64014e+06	1.66101e+06	1.76999e+06	1.69227e+06		3	940.837	7.472e-09	5.78
[R].NMQDVVEDFK.[N]	1xTMT6plex [K10]; 1xTMT6plex [N-Term]	1	1	6	W5Q6V2	W5Q6V2 [155-164]	0	1682.88	10	5.69204e+06	5.49519e+06	6.11126e+06	5.05586e+06	5.90095e+06	5.2387e+06		2	841.94	2.369e-05	2.92
[R].EREEQETTSSK.[I]	1xTMT6plex [K11]; 1xTMT6plex [N-Term]	1	1	4	W5P9L8	W5P9L8 [565-575]	1	1781.93	11	3.37265e+06	3.14017e+06	3.17026e+06	3.20348e+06	3294342	2.71832e+06		3	594.647	8.423e-05	2.2
[K].NMQDLVEDYR.[S]	1xTMT6plex [N-Term]	1	1	22	W5Q611	W5Q611 [220-229]	0	1511.74	10	3.56091e+07	4.36437e+07	3.45775e+07	5.91009e+07	5.85101e+07	6.37062e+07		2	756.375	1.834e-05	2.33
[R].NMQDLVEDFK.[NK]	1xDeamidated [N/Q]; 1xTMT6plex [K10]; 1xTMT6plex [N-Term]	2	4	9	W5Q687; W5Q5V9	W5Q687 [225-234]; W5Q5V9 [263-272]	0	1697.88	10	8.76507e+06	9.1946e+06	1.09011e+07	1.35052e+07	1.46645e+07	1.58789e+07	Shared	2	849.445	8.17e-06	2.96
[R].NMQDLVEDFK.[NK]	1xTMT6plex [K10]; 1xTMT6plex [N-Term]	2	4	22	W5Q687; W5Q5V9	W5Q687 [225-234]; W5Q5V9 [263-272]	0	1696.9	10	2.13999e+08	2.56368e+08	2.84366e+08	3.99861e+08	4.35194e+08	4.55149e+08	Shared	2	848.945	7.938e-06	3.07
[K].ERETLQQMAEVTR.[E]	1xTMT6plex [N-Term]	1	1	3	W5QAL0	W5QAL0 [122-134]	1	1819.95	13	1.05568e+06	916338	1.23275e+06	963954	1.15152e+06	1.01206e+06		3	607.319	4.856e-06	3.57
[R].NMNCIEMGGNPLENSGFEPGAFDGLK.[L]	1xCarbamidomethyl [C4]; 1xOxidation [M2]; 1xTMT6plex [K26]; 1xTMT6plex [N-Term]	1	2	2	O46390	O46390 [185-210]	0	3272.54	26	1.78451e+06	1.71371e+06	2.02583e+06	1.9277e+06	2.10466e+06	1.95631e+06		3	1091.52	5.391e-07	4.21
[R].NMNCIEMGGNPLENSGFEPGAFDGLK.[L]	1xCarbamidomethyl [C4]; 1xTMT6plex [K26]; 1xTMT6plex [N-Term]	1	2	3	O46390	O46390 [185-210]	0	3256.55	26	3.40614e+06	3.28451e+06	3.65822e+06	5.35784e+06	4.88286e+06	4.8417e+06		3	1086.18	7.968e-08	5.83
[R].ERLEEEQQLQK.[Q]	1xTMT6plex [K11]; 1xTMT6plex [N-Term]	2	2	35	P22793; W5QIV5	P22793 [233-243]; W5QIV5 [233-243]	1	1888.05	11	1.24149e+08	1.23288e+08	1.5513e+08	1.25617e+08	1.45272e+08	1.23246e+08	Shared	3	630.022	2.824e-06	4.18
[R].ERLEEEQQLQK.[Q]	1xDeamidated [Q]; 1xTMT6plex [K11]; 1xTMT6plex [N-Term]	2	2	2	P22793; W5QIV5	P22793 [233-243]; W5QIV5 [233-243]	1	1889.04	11	1.43081e+06	1.39634e+06	1.89158e+06	1.75711e+06	1.9832e+06	1.70958e+06	Shared	3	630.349	3.519e-05	2.83
[R].NNFLNSLPEEMESLTR.[L]	1xTMT6plex [N-Term]	1	1	2	W5PQD6	W5PQD6 [483-498]	0	2123.06	16	268216	212698	289669	315743	288696	320160		2	1062.03	4.536e-05	2.13
[K].NNGGAAAMEK.[L]	1xDeamidated [N2]; 1xTMT6plex [K10]; 1xTMT6plex [N-Term]	1	1	4	W5PS11	W5PS11 [286-295]	0	1421.75	10	5.73048e+06	4.87303e+06	6473152	6.01527e+06	7.22285e+06	6.77634e+06		2	711.373	5.533e-05	2.98
[R].EQWAHLEELSAIR.[K]	1xTMT6plex [N-Term]	1	1	7	W5NZX9	W5NZX9 [724-736]	0	1810.96	13	5.82373e+06	5.46564e+06	6.48799e+06	6.3984e+06	6.81177e+06	6.19528e+06		2	905.983	1.2e-05	4.14
[R].NNLAGAEELFAR.[K]	1xTMT6plex [N-Term]	1	1	8	W5PUT6	W5PUT6 [358-369]	0	1533.82	12	1.66201e+07	1.61498e+07	1.88754e+07	1.78699e+07	2.11325e+07	1.95845e+07		2	767.411	1.23e-06	5.08
[K].NNPEIPELPRPVVEQVQEK.[V]	1xTMT6plex [K19]; 1xTMT6plex [N-Term]	1	1	11	W5P7B0	W5P7B0 [82-100]	0	2673.5	19	1.47189e+07	1.64798e+07	1.64672e+07	1.4412e+07	1.60008e+07	1.51486e+07		3	891.839	1.702e-08	3.55
[R].NNNQQLAQLQK.[E]	1xDeamidated [N1]; 1xTMT6plex [K11]; 1xTMT6plex [N-Term]	1	1	2	W5Q5K3	W5Q5K3 [68-78]	0	1757.99	11	1.4509e+06	1487575	1.60559e+06	1.63004e+06	1.80153e+06	1.67603e+06		2	879.495	9.668e-05	3.54
[R].NNMQDVLEGFK.[K]	1xTMT6plex [K11]; 1xTMT6plex [N-Term]	1	1	1	W5Q6J4	W5Q6J4 [232-242]	0	1752.94	11	266462	255893	336944	375764	429562	402814		2	876.963	1.319e-05	2.7
[R].EQTEFGITSDK.[L]	1xTMT6plex [K11]; 1xTMT6plex [N-Term]	1	1	2	W5NZ72	W5NZ72 [501-511]	0	1712.91	11	1.3653e+06	1.30219e+06	1.5553e+06	1.71752e+06	1.77077e+06	1.49816e+06		2	856.956	9.619e-05	2.36
[K].EQTISEMLGPGNEAVR.[S]	1xTMT6plex [N-Term]	1	1	2	W5Q4K9	W5Q4K9 [679-694]	0	1960	16	232120	191895	253932	251231	277326	241955		2	980.503	2.678e-06	2.86
[R].EQTLSPTIINGLHNIAR.[S]	1xDeamidated [N10]; 1xTMT6plex [N-Term]	1	2	3	W5NU08	W5NU08 [1161-1177]	0	2107.17	17	5.85736e+06	5.8199e+06	6.58796e+06	6.645e+06	8.14059e+06	6.94061e+06		3	703.059	2.317e-05	3.29
[K].NNLSFIETSALDSTNVEEAFK.[N]	1xDeamidated [N]; 1xTMT6plex [K21]; 1xTMT6plex [N-Term]	1	1	2	W5P0V5	W5P0V5 [153-173]	0	2788.43	21	262101	256988	331565	385111	376460	356704		3	930.145	9.443e-06	4.04
[K].NNLSFIETSALDSTNVEEAFK.[N]	1xTMT6plex [K21]; 1xTMT6plex [N-Term]	1	1	2	W5P0V5	W5P0V5 [153-173]	0	2787.45	21	1.04481e+06	1.08889e+06	1.18862e+06	1.24315e+06	1.33548e+06	1.38996e+06		3	929.815	1.081e-07	5.94
[K].EQVAASESEPGK.[A]	1xTMT6plex [K12]; 1xTMT6plex [N-Term]	1	1	2	W5NUS1	W5NUS1 [308-319]	0	1689.91	12	491396	446514	578662	434847	551378	418761		2	845.453	3.627e-05	2.4
[K].EQVANSAFVER.[V]	1xTMT6plex [N-Term]	1	1	12	W5PHW0	W5PHW0 [492-502]	0	1478.78	11	1.51145e+07	1.29005e+07	1.79157e+07	1.51545e+07	1.75397e+07	1.63958e+07		2	739.893	2.718e-06	3.49
[K].EQVANSAFVER.[V]	1xDeamidated [N5]; 1xTMT6plex [N-Term]	1	1	10	W5PHW0	W5PHW0 [492-502]	0	1479.76	11	5.08656e+06	4.52138e+06	5.74231e+06	5.75384e+06	6.63207e+06	6.25849e+06		2	740.384	3.017e-06	2.73
[R].NMMFQVLAAEEPSVR.[V]	1xTMT6plex [N-Term]	1	1	4	W5PPU0	W5PPU0 [184-198]	0	1951	15	3.99512e+06	3.60931e+06	4.57616e+06	4950043	6.08332e+06	5.63828e+06		2	975.995	1.768e-07	3.96
[K].NNIPYFETSAK.[E]	1xTMT6plex [K11]; 1xTMT6plex [N-Term]	1	1	3	B2LYK6	B2LYK6 [147-157]	0	1741.95	11	6.39761e+06	6.30456e+06	6.61762e+06	5.90019e+06	6.55203e+06	6.18265e+06		2	871.475	3.163e-05	3.9
[K].NNLGELINTLNAAK.[V]	1xDeamidated [N1]; 1xTMT6plex [K14]; 1xTMT6plex [N-Term]	1	1	1	A0A6M6R7Y5	A0A6M6R7Y5 [57-70]	0	1944.12	14	3.52225e+06	3.35817e+06	4398965	4135937	5.2603e+06	4.9673e+06		2	972.555	2.721e-07	4.02
[K].EQVLEPMLNGTDK.[T]	1xDeamidated [N9]; 1xTMT6plex [K13]; 1xTMT6plex [N-Term]	1	1	6	W5P2D1	W5P2D1 [951-963]	0	1933.04	13	1.37935e+06	1.26254e+06	1.36005e+06	1.42419e+06	1.67543e+06	1.52342e+06		2	967.025	2.054e-05	3.03
[K].NNLGELINTLNAAK.[V]	1xTMT6plex [K14]; 1xTMT6plex [N-Term]	1	1	6	A0A6M6R7Y5	A0A6M6R7Y5 [57-70]	0	1943.13	14	1.93187e+07	1.788e+07	2.30499e+07	2.27047e+07	2.71505e+07	2.46449e+07		2	972.063	2.015e-08	4.19
[K].NNLEPILEGYTSNLR.[K]	1xDeamidated [N]; 1xTMT6plex [N-Term]	1	1	4	W5Q643	W5Q643 [173-187]	0	1963.03	15	1.82587e+06	1.69142e+06	2.05063e+06	2.11065e+06	2.22025e+06	2.02524e+06		2	982.021	1.65e-06	2
[K].NNLEPILEGYTSNLR.[K]	1xTMT6plex [N-Term]	1	1	3	W5Q643	W5Q643 [173-187]	0	1962.05	15	2.66834e+06	2.46529e+06	3.03845e+06	3.19864e+06	3.29366e+06	2.97115e+06		3	654.685	3.644e-06	4.3
[R].EQVLQPVSAELLELDIR.[E]	1xTMT6plex [N-Term]	1	1	3	W5PTW0	W5PTW0 [103-119]	0	2181.23	17	420536	388816	493287	786490	566125	534275		3	727.746	1.812e-05	4.22
[K].NNLEPILEGYISNLR.[K]	1xDeamidated [N]; 1xTMT6plex [N-Term]	1	3	16	G3ER51	G3ER51 [177-191]	0	1975.07	15	1.81073e+07	1.66552e+07	2.04051e+07	2.11644e+07	2.30162e+07	2.2578e+07		2	988.033	3.082e-08	2.73
[K].NNLEPILEGYISNLR.[K]	1xTMT6plex [N-Term]	1	3	9	G3ER51	G3ER51 [177-191]	0	1974.09	15	1.29592e+08	1.25044e+08	1.21937e+08	1.24278e+08	1.23161e+08	1.33683e+08		2	987.539	2.369e-06	3.36
[R].NNLEPLFESFINNLR.[G]	1xDeamidated [N12]; 1xTMT6plex [N-Term]	1	1	3	W5Q5S8	W5Q5S8 [172-186]	0	2050.08	15	1.31843e+06	1.27239e+06	1.49198e+06	1.55793e+06	1.85488e+06	1.66454e+06		3	684.028	1.83e-05	3.98
[R].NNLEPLFESFINNLR.[G]	1xTMT6plex [N-Term]	1	1	1	W5Q5S8	W5Q5S8 [172-186]	0	2049.1	15	5752651	6.36045e+06	6675135	10712680	13001141	11763907		2	1025.04	2.188e-08	5.09
[K].NNIENLISTLK.[Q]	1xTMT6plex [K11]; 1xTMT6plex [N-Term]	1	1	2	W5P7J8	W5P7J8 [1206-1216]	0	1717.03	11	502509	520935	565957	604416	690498	614727		2	859.009	2.09e-05	2.84
[R].NNLLQAELEELR.[A]	1xTMT6plex [N-Term]	1	2	3	W5QDF3	W5QDF3 [1678-1689]	0	1670.93	12	1.01582e+06	1.00992e+06	3.05346e+06	1.37517e+06	1.00463e+06	962290		2	835.967	1.245e-06	3.26
[K].NNPEIPELPRPVVEQVQEK.[V]	1xDeamidated [Q15]; 1xTMT6plex [K19]; 1xTMT6plex [N-Term]	1	1	3	W5P7B0	W5P7B0 [82-100]	0	2674.48	19	2.9037e+06	3.05171e+06	3.22497e+06	2.7585e+06	3.18401e+06	3.09346e+06		3	892.169	1.885e-05	2.91
[R].ERLEQQVPVSQVFGQDEMIDVIGVTK.[G]	1xDeamidated [Q15]; 1xTMT6plex [K26]; 1xTMT6plex [N-Term]	1	1	2	W5Q4S3	W5Q4S3 [199-224]	1	3403.82	26	3.22287e+06	2.12486e+06	3.67203e+06	3.09156e+06	3.61713e+06	3.52442e+06		4	851.711	1.438e-07	4.36
[K].ERNSDQASMPDNTAAQK.[V]	1xDeamidated [N3]; 1xTMT6plex [K17]; 1xTMT6plex [N-Term]	1	1	3	W5QBQ9	W5QBQ9 [359-375]	1	2322.14	17	2.28348e+06	1.96096e+06	2.55929e+06	2.41264e+06	2480069	2.65076e+06		3	774.717	5.241e-08	4.81
[R].NLVVDDETASSLR.[V]	1xTMT6plex [N-Term]	1	1	10	W5Q5Q6	W5Q5Q6 [749-761]	0	1647.88	13	1.70783e+07	1.72355e+07	1.48729e+07	1.24979e+07	1.26832e+07	1.31908e+07		2	824.436	5.582e-07	3.99
[R].NLVTTFSNMDDMLQK.[A]	1xTMT6plex [K15]; 1xTMT6plex [N-Term]	1	1	2	W5PMZ3	W5PMZ3 [1120-1134]	0	2215.15	15	3.2435e+06	3.25122e+06	3.19303e+06	3.69007e+06	4317337	3890273		2	1108.07	2.484e-08	4.59
[K].ESDIMTTNGVIHVIDK.[L]	1xTMT6plex [K16]; 1xTMT6plex [N-Term]	2	2	2	W5PK02; W5PK03	W5PK02 [611-626]; W5PK03 [611-626]	0	2230.22	16	2.21427e+06	2.17359e+06	2.17382e+06	4.0472e+06	4699299	3526532	Shared	3	744.073	1.966e-06	5.24
[K].ESDIMTTNGVIHVIDK.[L]	1xDeamidated [N8]; 1xTMT6plex [K16]; 1xTMT6plex [N-Term]	2	2	19	W5PK02; W5PK03	W5PK02 [611-626]; W5PK03 [611-626]	0	2231.2	16	1.56944e+07	1.57887e+07	1.63875e+07	3.47075e+07	3.92961e+07	3.58482e+07	Shared	2	1116.1	1.049e-08	3.92
[K].ESDIMTTNGVIHVIDK.[L]	1xOxidation [M5]; 1xTMT6plex [K16]; 1xTMT6plex [N-Term]	2	2	3	W5PK02; W5PK03	W5PK02 [611-626]; W5PK03 [611-626]	0	2246.21	16	3.97541e+06	3.67887e+06	3.91609e+06	4.41349e+06	4.99338e+06	4267871	Shared	3	749.402	0.0001111	3.54
[K].ESDIMTTNGVIHVIDK.[L]	1xDeamidated [N8]; 1xOxidation [M5]; 1xTMT6plex [K16]; 1xTMT6plex [N-Term]	2	2	9	W5PK02; W5PK03	W5PK02 [611-626]; W5PK03 [611-626]	0	2247.19	16	6.98602e+06	6.73561e+06	7.93001e+06	1.05263e+07	1.21073e+07	1.0872e+07	Shared	3	749.73	6.207e-06	4.37
[K].NLVTETVMQMLVDLAK.[S]	1xTMT6plex [K16]; 1xTMT6plex [N-Term]	1	1	2	W5P323	W5P323 [58-73]	0	2263.28	16	1.35242e+06	1.24213e+06	1.48364e+06	2.24628e+06	1.9421e+06	1.86463e+06		2	1132.14	9.47e-10	5.15
[K].ESDLNGAQIK.[L]	1xDeamidated [N5]; 1xTMT6plex [K10]; 1xTMT6plex [N-Term]	1	1	19	W5Q9T3	W5Q9T3 [125-134]	0	1533.85	10	1.17994e+07	1.16589e+07	1.20277e+07	1.03706e+07	1.16442e+07	1.06394e+07		2	767.427	2.745e-05	3.37
[R].NIVSDCSAFVK.[M]	1xCarbamidomethyl [C6]; 1xTMT6plex [K11]; 1xTMT6plex [N-Term]	1	1	4	W5PCL4	W5PCL4 [328-338]	0	1697.93	11	8.46909e+06	8.14062e+06	1.0188e+07	8.50076e+06	9.91327e+06	8.99004e+06		2	849.464	9.497e-06	4.5
[R].NLVPLLLAPENLVEK.[E]	1xTMT6plex [K15]; 1xTMT6plex [N-Term]	1	2	2	W5PH19	W5PH19 [307-321]	0	2120.31	15	2.60986e+06	2418891	2810499	3.00124e+06	3.22792e+06	3236296		2	1060.65	1.443e-05	4.03
[R].NLVNDDDAIVAASK.[C]	1xTMT6plex [K14]; 1xTMT6plex [N-Term]	1	1	3	W5PH43	W5PH43 [360-373]	0	1903.05	14	1.87804e+06	1.71994e+06	2.0791e+06	2.09711e+06	2.33296e+06	2.12165e+06		2	952.021	4.966e-08	4.69
[K].ESDQLGADATK.[E]	1xTMT6plex [K11]; 1xTMT6plex [N-Term]	1	2	7	W5PWQ4	W5PWQ4 [14-24]	0	1592.85	11	6.51463e+06	6.59303e+06	7.05588e+06	7.45345e+06	9.03805e+06	7.52075e+06		2	796.929	3.007e-06	3.18
[R].ESDSMETEEK.[T]	1xTMT6plex [K10]; 1xTMT6plex [N-Term]	1	1	3	W5QHM6	W5QHM6 [293-302]	0	1642.79	10	508865	494388	575691	626603	641509	675690		2	821.898	1.176e-05	2.75
[K].ESDTGLAPPALWDLAADK.[Q]	1xTMT6plex [K18]; 1xTMT6plex [N-Term]	1	1	2	W5QCP6	W5QCP6 [104-121]	0	2328.25	18	943253	818808	1.06452e+06	1.03597e+06	1.22737e+06	1.08019e+06		2	1164.62	7.607e-08	4.76
[K].ESDVAFIPTSGLSGENLITR.[S]	1xDeamidated [N16]; 1xTMT6plex [N-Term]	1	2	1	W5P6M7	W5P6M7 [438-457]	0	2336.22	20	426932	446219	531926	504001	522101	479354		2	1168.62	2.714e-05	2.6
[R].ESDVIDVMEK.[C]	1xTMT6plex [K10]; 1xTMT6plex [N-Term]	1	1	4	W5PDV0	W5PDV0 [432-441]	0	1622.87	10	797032	690181	754057	959372	1.12769e+06	976576		2	811.943	1.544e-05	1.76
[K].ESDVPLKNEEFEVTK.[T]	2xTMT6plex [K7; K15]; 1xTMT6plex [N-Term]	1	1	2	W5PH79	W5PH79 [87-101]	1	2451.36	15	2.15677e+06	1.90944e+06	2.5369e+06	2.02551e+06	2.54701e+06	2.25626e+06		3	817.786	2.068e-05	3.41
[K].NLVELAELELK.[H]	1xTMT6plex [K11]; 1xTMT6plex [N-Term]	1	1	2	W5P9Y1	W5P9Y1 [358-368]	0	1729.05	11	2.40841e+06	2121717	2.87169e+06	2.07765e+06	2340673	2.18802e+06		2	865.023	4.895e-05	3.27
[R].NLVEGGEAVLEEK.[L]	1xTMT6plex [K13]; 1xTMT6plex [N-Term]	1	1	6	W5NUY7	W5NUY7 [1618-1630]	0	1845.04	13	3.43356e+06	2.79923e+06	3.62381e+06	2.9998e+06	3.62232e+06	3.14924e+06		2	923.02	2.77e-07	4.57
[K].ESEAVEWQQK.[A]	1xTMT6plex [K10]; 1xTMT6plex [N-Term]	1	1	9	W5P4R1	W5P4R1 [527-536]	0	1691.9	10	6.18128e+06	5.73336e+06	6.94658e+06	7.18043e+06	8.72317e+06	7.76509e+06		2	846.452	9.638e-06	3.82
[K].NLTVILSDASAPGEGEHK.[I]	1xTMT6plex [K18]; 1xTMT6plex [N-Term]	1	1	1	W5P2W0	W5P2W0 [165-182]	0	2296.25	18	1.18753e+06	1.00365e+06	1.29144e+06	1.03457e+06	1.08458e+06	1.02812e+06		3	766.083	6.214e-06	4.3
[R].NLTNPNTVIILIGNK.[A]	1xTMT6plex [K15]; 1xTMT6plex [N-Term]	1	2	4	W5P645	W5P645 [111-125]	0	2082.27	15	6.90198e+06	6.70211e+06	7.92112e+06	9.53328e+06	1.04142e+07	9.94515e+06		2	1041.63	1.022e-07	4.68
[K].NITLDDASAPR.[L]	1xTMT6plex [N-Term]	1	1	6	W5QFL4	W5QFL4 [774-784]	0	1401.75	11	4.81171e+06	4.46137e+06	5.44626e+06	5.24346e+06	5.58414e+06	5.49537e+06		2	701.381	1.897e-05	3.11
[K].ESDAMFAAER.[A]	1xTMT6plex [N-Term]	1	1	6	W5QA59	W5QA59 [157-166]	0	1355.65	10	1.24843e+06	973692	1.29876e+06	1.33813e+06	1.46567e+06	1.44718e+06		2	678.329	9.77e-05	2.65
[R].NLVYDNADNK.[L]	1xDeamidated [N6]; 1xTMT6plex [K10]; 1xTMT6plex [N-Term]	1	1	1	W5PDF4	W5PDF4 [207-216]	0	1624.86	10	537801	449606	541964	485533	573383	516802		2	812.931	3.392e-05	3.33
[K].NMADQIIQEIYGQIQSK.[K]	1xTMT6plex [K17]; 1xTMT6plex [N-Term]	1	1	1	W5Q5G8	W5Q5G8 [265-281]	0	2437.32	17	523365	383573	527231	545907	594589	599792		2	1219.15	5.109e-06	2.37
[R].ESASVTCLVK.[G]	1xCarbamidomethyl [C7]; 1xTMT6plex [K10]; 1xTMT6plex [N-Term]	1	1	2	W5NXW9	W5NXW9 [349-358]	0	1551.88	10	1.76984e+07	19818192	1.74821e+07	2.28572e+07	25216063	19330668		2	776.437	7.337e-05	2.18
[K].NMITGTSQADCAVLIVAAGVGEFEAGISKNGQTR.[E]	1xCarbamidomethyl [C11]; 1xDeamidated [N30]; 1xTMT6plex [K29]; 1xTMT6plex [N-Term]	1	7	1	W5PD15	W5PD15 [101-134]	1	3925.02	34	44967.2	50799.1	49467.4	51609.6	39884.5	49432.5		4	982.002	1.354e-05	3.39
[R].ERPDLPPIQYEPVLCSR.[T]	1xCarbamidomethyl [C15]; 1xTMT6plex [N-Term]	1	1	1	W5PF11	W5PF11 [47-63]	0	2298.21	17	2.05309e+06	1.85661e+06	2.35143e+06	1.99021e+06	2346340	2.09003e+06		3	766.736	1.199e-05	4.61
[K].NMITGTSQADCAVLIVAAGVGEFEAGISK.[N]	1xCarbamidomethyl [C11]; 1xOxidation [M2]; 1xTMT6plex [K29]; 1xTMT6plex [N-Term]	1	7	3	W5PD15	W5PD15 [101-129]	0	3383.76	29	342978	305964	536089	381513	381762	332786		3	1128.59	2.38e-12	5.83
[K].KGEQPEAASK.[A]	2xTMT6plex [K1; K10]; 1xTMT6plex [N-Term]	1	1	1	W5NPK8	W5NPK8 [197-206]	1	1732.02	10	923378	1.00956e+06	953903	897482	903244	861268		3	578.008	7.639e-05	3.44
[K].NMITGTSQADCAVLIVAAGVGEFEAGISK.[N]	1xCarbamidomethyl [C11]; 1xTMT6plex [K29]; 1xTMT6plex [N-Term]	1	7	37	W5PD15	W5PD15 [101-129]	0	3367.76	29	5.04665e+06	4.77556e+06	5.26751e+06	6.065e+06	6.46256e+06	5.94635e+06		2	1684.37	3.621e-12	7.14
[R].ERPGVDDFVLVSK.[D]	1xTMT6plex [K13]; 1xTMT6plex [N-Term]	1	1	1	W5Q1W4	W5Q1W4 [717-729]	0	1919.1	13	1.55492e+06	1.34361e+06	1.76512e+06	1.56919e+06	1903215	1.64165e+06		3	640.369	7.383e-05	4.35
[K].NMLFSGTNIAAGK.[A]	1xTMT6plex [K13]; 1xTMT6plex [N-Term]	2	5	3	W5Q3Y9; W5NVR5	W5Q3Y9 [222-234]; W5NVR5 [225-237]	0	1782	13	1.0025e+07	8.75634e+06	1.05595e+07	8.60714e+06	1.01788e+07	9.24604e+06	Shared	2	891.498	3.147e-05	3.27
[R].NMIENSMFEEEPDVVDLAK.[E]	1xTMT6plex [K19]; 1xTMT6plex [N-Term]	1	1	1	W5Q9C5	W5Q9C5 [14-32]	0	2668.33	19	199589	171454	190797	270392	307083	273535		3	890.109	3.806e-05	3.76
[K].NMFLVGEGDSVITQVLNK.[S]	1xTMT6plex [K18]; 1xTMT6plex [N-Term]	1	3	1	W5PX46	W5PX46 [425-442]	0	2422.34	18	1.11185e+06	1.18498e+06	1092657	1.02082e+06	1.14904e+06	1.07454e+06		2	1211.67	1.317e-09	5.14
[R].ERQEEVQLQK.[R]	1xTMT6plex [K10]; 1xTMT6plex [N-Term]	2	2	20	P22793; W5QIV5	P22793 [215-224]; W5QIV5 [215-224]	1	1745	10	6.05689e+07	6.78486e+07	8.58244e+07	6.58669e+07	7.81112e+07	6.83341e+07	Shared	3	582.336	5.364e-06	4.25
[K].NMEQLNYSALCLPDDIR.[A]	1xCarbamidomethyl [C11]; 1xTMT6plex [N-Term]	1	1	2	W5QB90	W5QB90 [438-454]	0	2281.12	17	1.06636e+06	936306	1.1803e+06	1.14862e+06	1.22659e+06	1.20564e+06		2	1141.06	5.762e-09	4.44
[R].ERLEQQVPVSQVFGQDEMIDVIGVTK.[G]	2xDeamidated [Q11; Q15]; 1xTMT6plex [K26]; 1xTMT6plex [N-Term]	1	1	1	W5Q4S3	W5Q4S3 [199-224]	1	3404.8	26	670700	575693	680900	681586	764073	729046		3	1135.61	1.806e-08	5.53
[K].ERVEFILEQMR.[L]	1xTMT6plex [N-Term]	1	1	1	W5Q2N2	W5Q2N2 [181-191]	1	1678.91	11	293631	281736	331382	349768	371013	325082		3	560.308	5.41e-05	4.38
[R].ESAAADAGFALFEK.[K]	1xTMT6plex [K14]; 1xTMT6plex [N-Term]	1	1	1	W5PMN8	W5PMN8 [575-588]	0	1885.01	14	932176	890199	1.03109e+06	1.06389e+06	1.13054e+06	1.05722e+06		2	943.002	2.487e-07	3.83
[K].ESAADAGAEPPPTDSDPTYSSK.[V]	1xTMT6plex [K22]; 1xTMT6plex [N-Term]	1	1	1	W5PKK4	W5PKK4 [289-310]	0	2651.27	22	109540	90767.5	105354	115896	113585	90891.4		3	884.427	2.927e-05	2.5
[K].NMDPLNDNVTSLLNASSDK.[F]	3xDeamidated [N6; N8; N14]; 1xTMT6plex [K19]; 1xTMT6plex [N-Term]	1	2	1	W5PGT5	W5PGT5 [604-622]	0	2509.24	19	438099	460823	438703	242342	229487	267267		2	1255.13	3.812e-06	3.55
[K].NMDPLNDNVTSLLNASSDK.[F]	2xDeamidated [N8; N14]; 1xTMT6plex [K19]; 1xTMT6plex [N-Term]	1	2	1	W5PGT5	W5PGT5 [604-622]	0	2508.25	19	2.32524e+06	2.22056e+06	2.25902e+06	1.56261e+06	1.66241e+06	1.6571e+06		3	836.758	1.392e-05	3.9
[K].NMDPLNDNVTSLLNASSDK.[F]	1xDeamidated [N]; 1xTMT6plex [K19]; 1xTMT6plex [N-Term]	1	2	5	W5PGT5	W5PGT5 [604-622]	0	2507.27	19	8.08502e+06	8.27515e+06	8.18846e+06	6.53955e+06	7.26964e+06	6.58835e+06		3	836.425	1.181e-08	3.74
[R].ESAINVAEGK.[K]	1xTMT6plex [K10]; 1xTMT6plex [N-Term]	1	1	3	W5PRD7	W5PRD7 [212-221]	0	1475.85	10	2.08963e+06	1.63039e+06	2.11152e+06	1.78086e+06	2.04805e+06	1.73656e+06		2	738.423	2.936e-05	3.29
[K].NMDPLNDNVTSLLNASSDK.[F]	1xTMT6plex [K19]; 1xTMT6plex [N-Term]	1	2	6	W5PGT5	W5PGT5 [604-622]	0	2506.29	19	1.38969e+07	1.39426e+07	1.26937e+07	7.94338e+06	9.05226e+06	8.50504e+06		2	1253.64	1.737e-10	5.37
[R].NMCLNGMCINEDGSFK.[C]	2xCarbamidomethyl [C3; C8]; 1xDeamidated [N5]; 1xTMT6plex [K16]; 1xTMT6plex [N-Term]	1	1	1	W5QIN8	W5QIN8 [580-595]	0	2349.07	16	2.20597e+06	2.10706e+06	2.01571e+06	2.0744e+06	2.40961e+06	2.2033e+06		3	783.694	8.335e-05	3.91
[R].ESAQVLRPGSPASLTCVAPLSDVDFQLR.[R]	1xCarbamidomethyl [C16]; 1xTMT6plex [N-Term]	1	1	1	W5P101	W5P101 [221-248]	0	3242.7	28	1101226	1.06119e+06	1.47529e+06	1.19123e+06	1.2942e+06	1.03299e+06		3	1081.56	2.528e-08	4.81
[R].ESAQVLRPGSPASLTCVAPLSDVDFQLR.[R]	1xCarbamidomethyl [C16]; 2xDeamidated [Q4; Q26]; 1xTMT6plex [N-Term]	1	1	1	W5P101	W5P101 [221-248]	0	3244.67	28	1.85963e+06	1.53339e+06	2225415	1.77102e+06	1.96201e+06	1482966		3	1082.24	1.658e-07	2.64
[K].NMALDMGNEIEAQNR.[Q]	1xTMT6plex [N-Term]	1	1	3	W5QH64	W5QH64 [168-182]	0	1934.93	15	783110	649863	780215	876743	1.03036e+06	931166		2	967.957	4.038e-06	3.26
[K].NMDPLNDNVTSLLNASSDK.[F]	1xOxidation [M2]; 1xTMT6plex [K19]; 1xTMT6plex [N-Term]	1	2	1	W5PGT5	W5PGT5 [604-622]	0	2522.28	19	1309140	1530152	2.17241e+06	632215	686928	708169		2	1261.64	1.669e-08	3.96
[K].NNPVHLITEEDLK.[Q]	1xTMT6plex [K13]; 1xTMT6plex [N-Term]	1	1	2	W5PRB0	W5PRB0 [391-403]	0	1980.12	13	1.78193e+06	1.60805e+06	2.11189e+06	1.90942e+06	2.1511e+06	1.94384e+06		3	660.708	0.0001312	2.74
[R].NNQFNQDELALMEK.[F]	1xTMT6plex [K14]; 1xTMT6plex [N-Term]	1	1	1	W5Q5A1	W5Q5A1 [88-101]	0	2152.11	14	721414	692056	796700	627016	947799	865389		3	718.043	2.562e-05	3.08
[R].NNQFSPEEVVIVEK.[F]	1xTMT6plex [K14]; 1xTMT6plex [N-Term]	1	1	2	W5NS08	W5NS08 [88-101]	0	2090.15	14	1.16387e+06	1.03228e+06	1.43353e+06	1.21892e+06	1.37635e+06	1.42614e+06		2	1045.58	7.997e-05	2.52
[R].NPTDLLAIDSK.[T]	1xTMT6plex [K11]; 1xTMT6plex [N-Term]	1	1	12	W5P9B0	W5P9B0 [430-440]	0	1644.96	11	1.27667e+07	1.26869e+07	1.47562e+07	1.82966e+07	2.21691e+07	2.081e+07		2	822.978	1.386e-05	2.88
[K].NPSAMAVESFTATAPFVQIGR.[F]	1xTMT6plex [N-Term]	1	1	4	W5NSG2	W5NSG2 [169-189]	0	2423.26	21	4.8056e+06	4.66403e+06	5.17242e+06	5.20269e+06	5.77384e+06	5.54718e+06		2	1212.13	6.332e-11	5.77
[R].NPQSYLYLVK.[G]	1xTMT6plex [K10]; 1xTMT6plex [N-Term]	1	1	2	W5PSC5	W5PSC5 [265-274]	0	1682.99	10	5112799	4.57775e+06	6.02675e+06	5.24054e+06	5645218	5.01727e+06		2	841.991	5.719e-05	3.41
[R].NPQNSSQSADGLR.[C]	1xTMT6plex [N-Term]	1	1	6	W5PND9	W5PND9 [40-52]	0	1602.8	13	1.9588e+06	1.91995e+06	2.07811e+06	2.03261e+06	2.33351e+06	2.11124e+06		2	801.907	2.134e-06	3.12
[R].NPPLADALLSGDLER.[F]	1xTMT6plex [N-Term]	1	1	3	W5PHE6	W5PHE6 [156-170]	0	1809.99	15	1.14511e+06	1.03361e+06	1.49337e+06	1.42146e+06	1.56804e+06	1.41971e+06		2	905.495	3.021e-06	4.29
[R].NPPGFAFVEFEDPRDAADAVR.[E]	1xTMT6plex [N-Term]	1	1	2	B0FZL9	B0FZL9 [44-64]	1	2549.26	21	5.31775e+06	4.68444e+06	6.18288e+06	4.67777e+06	5385969	5.43528e+06		3	850.421	8.966e-06	4.04
[R].NPPGFAFVEFEDPR.[D]	1xTMT6plex [N-Term]	2	2	10	W5PG50; B0FZL9	W5PG50 [45-58]; B0FZL9 [44-57]	0	1850.93	14	2.47944e+07	2.44648e+07	2.69656e+07	2.70295e+07	3.16287e+07	2.86641e+07	Shared	2	925.959	1.128e-05	3.3
[R].NPNAVLTLVDDDLAQEYQK.[E]	1xTMT6plex [K19]; 1xTMT6plex [N-Term]	1	1	1	W5Q613	W5Q613 [239-257]	0	2604.39	19	431530	345762	396618	452889	463387	463690		3	868.797	0.000121	2.97
[R].EQLGPVTQEFWDNLEK.[E]	1xTMT6plex [K16]; 1xTMT6plex [N-Term]	1	1	8	O02762	O02762 [16-31]	0	2391.26	16	6.88069e+06	4.41801e+06	7.85857e+06	6.91078e+06	8.26749e+06	5.73971e+06		2	1196.12	4.134e-09	5.5
[R].EQLGPVTQEFWDNLEK.[E]	1xDeamidated [Q2]; 1xTMT6plex [K16]; 1xTMT6plex [N-Term]	1	1	1	O02762	O02762 [16-31]	0	2392.24	16	654532	507285	630316	648307	650436	503343		3	798.084	0.0001007	2.53
[K].EQILAALEK.[G]	1xTMT6plex [K9]; 1xTMT6plex [N-Term]	1	1	15	W5PAJ2	W5PAJ2 [431-439]	0	1472.91	9	6.88123e+07	7.09739e+07	7.4493e+07	7.40495e+07	9.58117e+07	8.16037e+07		2	736.959	2.788e-05	2.92
[K].NPLPVTLTNVVFR.[L]	1xTMT6plex [N-Term]	1	1	1	W5QCX2	W5QCX2 [685-697]	0	1699.01	13	2.36378e+06	2.13666e+06	2.55206e+06	2.8151e+06	3.2809e+06	2973594		2	850.001	0.0001172	3.53
[K].EQLIQEGLLDR.[C]	1xTMT6plex [N-Term]	1	2	2	W5PQF3	W5PQF3 [117-127]	0	1542.87	11	610932	528863	737959	688936	710392	724018		2	771.939	2.705e-05	3.57
[K].EQLLQSNPVLEAFGNAK.[T]	1xTMT6plex [K17]; 1xTMT6plex [N-Term]	1	4	2	W5PX99	W5PX99 [140-156]	0	2316.3	17	1.31541e+06	1.25458e+06	1.52725e+06	1.66617e+06	1.82654e+06	1.69293e+06		3	772.766	5.893e-05	2.82
[K].EQLMASDDFGR.[D]	1xTMT6plex [N-Term]	1	1	3	W5PJ75	W5PJ75 [275-285]	0	1497.72	11	4.35701e+06	3.82293e+06	3.60415e+06	3.9731e+06	4.42615e+06	3.62678e+06		2	749.36	7.592e-06	3.8
[K].NPGYPQSEGLLGECMIR.[H]	1xCarbamidomethyl [C14]; 1xTMT6plex [N-Term]	1	1	2	W5PJJ0	W5PJJ0 [83-99]	0	2150.06	17	1.76114e+06	1.86156e+06	1.66654e+06	1.19265e+06	1.18033e+06	1.1588e+06		2	1075.53	9.997e-05	2.13
[R].EQIMVLNNK.[F]	1xTMT6plex [K9]; 1xTMT6plex [N-Term]	1	1	6	W5Q5Z3	W5Q5Z3 [174-182]	0	1546.9	9	3.74851e+07	3.70386e+07	3.69005e+07	3.94901e+07	4.5208e+07	4.00237e+07		2	773.951	0.0001104	3.14
[K].NPGVGNGDDEAAELMQQVNVLK.[L]	1xDeamidated [N6]; 1xTMT6plex [K22]; 1xTMT6plex [N-Term]	1	2	1	W5P3N0	W5P3N0 [208-229]	0	2757.41	22	468801	418461	540736	646834	693486	642470		3	919.811	1.689e-05	3.55
[R].NPGNQAAYEHFETMK.[N]	1xTMT6plex [K15]; 1xTMT6plex [N-Term]	2	2	2	W5PFJ0; W5PFI7	W5PFJ0 [612-626]; W5PFI7 [616-630]	0	2195.1	15	1.00083e+06	996550	1.22112e+06	1.26618e+06	1.43788e+06	1.41067e+06	Shared	3	732.366	2.548e-06	4.49
[K].NPFLAVVTTNR.[K]	1xTMT6plex [N-Term]	1	1	3	W5PVE3	W5PVE3 [288-298]	0	1460.84	11	7.53281e+06	7.68607e+06	8912209	8.73392e+06	1.13353e+07	1.05736e+07		2	730.921	5.372e-05	3.15
[K].EQLQDMGLEDLFSPEK.[S]	1xTMT6plex [K16]; 1xTMT6plex [N-Term]	1	2	5	P32262	P32262 [366-381]	0	2337.2	16	8.64264e+06	6.34391e+06	9.07034e+06	9.27262e+06	1.0397e+07	9.14173e+06		2	1169.1	7.017e-09	4.2
[K].EQLQDMGLEDLFSPEK.[S]	1xOxidation [M6]; 1xTMT6plex [K16]; 1xTMT6plex [N-Term]	1	2	3	P32262	P32262 [366-381]	0	2353.2	16	1.04152e+06	826569	1.60381e+06	1.18706e+06	1.23816e+06	1.0647e+06		3	785.069	7.28e-07	4.66
[K].NPFGNAGLLLGEAGK.[Q]	1xDeamidated [N]; 1xTMT6plex [K15]; 1xTMT6plex [N-Term]	1	1	3	W5PLW6	W5PLW6 [545-559]	0	1917.08	15	1.44799e+07	14279334	1.77437e+07	1.73573e+07	21790413	20031624		2	959.05	8.427e-05	3.37
[K].NPVEGFSAGLIDDNDLYR.[W]	1xTMT6plex [N-Term]	1	1	3	W5QCH9	W5QCH9 [5-22]	0	2224.11	18	1.37478e+06	1.12414e+06	1.54235e+06	1.30925e+06	1.47748e+06	1.24531e+06		2	1112.55	3.363e-08	4.99
[K].EQLDSSNSTIAILQNEK.[N]	1xTMT6plex [K17]; 1xTMT6plex [N-Term]	1	1	6	W5Q2I7	W5Q2I7 [880-896]	0	2348.27	17	5.21541e+06	4.51572e+06	5.63034e+06	5.36196e+06	6.03245e+06	5.40353e+06		3	783.428	1.298e-05	5.05
[K].EQLDPDELETITMHK.[I]	1xTMT6plex [K15]; 1xTMT6plex [N-Term]	1	1	1	W5Q329	W5Q329 [420-434]	0	2257.18	15	682452	592435	588874	746119	684014	683514		3	753.064	1.8e-06	4.66
[K].EQLDNQLDAYMSK.[T]	1xTMT6plex [K13]; 1xTMT6plex [N-Term]	1	1	4	W5NRG5	W5NRG5 [230-242]	0	2013.04	13	2.82788e+06	2.64731e+06	3.06072e+06	3.04912e+06	3.21971e+06	3.07343e+06		2	1007.02	2.349e-07	4.64
[R].EQGFETEDIK.[E]	1xTMT6plex [K10]; 1xTMT6plex [N-Term]	1	1	3	W5PFM8	W5PFM8 [250-259]	0	1653.87	10	3.13293e+06	2.22733e+06	3.56588e+06	3.75867e+06	4.81414e+06	4.20341e+06		2	827.439	2.893e-05	3.33
[R].EQGFETEDIKEIAR.[K]	1xTMT6plex [K10]; 1xTMT6plex [N-Term]	1	1	4	W5PFM8	W5PFM8 [250-263]	1	2123.14	14	9.79753e+06	7979706	1.22434e+07	1.03691e+07	1.28718e+07	1.19745e+07		3	708.381	1.099e-06	3.78
[K].NQEQLLTLASILR.[E]	1xTMT6plex [N-Term]	1	1	2	W5NRM2	W5NRM2 [151-163]	0	1728.02	13	2.06289e+06	2.01215e+06	2.62104e+06	2.71668e+06	3.27544e+06	2.59863e+06		2	864.507	5.033e-05	3.84
[K].NQEQLAAELAEFTAK.[I]	1xTMT6plex [K15]; 1xTMT6plex [N-Term]	1	2	2	W5PUV9	W5PUV9 [413-427]	0	2121.16	15	2.19755e+06	2.0299e+06	2.67104e+06	1.9368e+06	2.4917e+06	2.0408e+06		2	1061.08	1.132e-09	5.8
[R].EQGNIEEAVR.[L]	1xTMT6plex [N-Term]	1	1	5	W5Q7C2	W5Q7C2 [339-348]	0	1373.72	10	1.4104e+06	1.22448e+06	1.5907e+06	1.40529e+06	1.78888e+06	1.62447e+06		2	687.363	0.0001218	3.07
[R].EQGNIYKPNNK.[A]	2xTMT6plex [K7; K11]; 1xTMT6plex [N-Term]	2	2	2	Q6B3Y2; A0A075B6D9	Q6B3Y2 [20-30]; A0A075B6D9 [20-30]	0	1992.15	11	3.38144e+06	4.13381e+06	3.73413e+06	3.04949e+06	3.33426e+06	3.07331e+06	Shared	3	664.716	1.366e-05	3.19
[K].EQGTQQAFVFGQNLR.[D]	1xTMT6plex [N-Term]	1	1	1	W5P9Q4	W5P9Q4 [205-219]	0	1952.02	15	682200	603703	722409	724066	782369	774636		2	976.509	2.042e-05	3.19
[K].EQGVETSVTYYR.[L]	1xTMT6plex [N-Term]	1	1	3	W5P066	W5P066 [20-31]	0	1660.84	12	1.21881e+06	1.3207e+06	1404774	1.25405e+06	1.32452e+06	1.17414e+06		2	830.924	4.467e-05	2.36
[K].NQEIQWMETAR.[W]	1xTMT6plex [N-Term]	1	1	6	W5PD87	W5PD87 [80-90]	0	1634.82	11	5.41771e+06	4.5318e+06	5.15381e+06	6.89665e+06	8.12711e+06	6.83071e+06		2	817.91	8.951e-06	2.71
[K].KGLEELLVGGSHLK.[E]	2xTMT6plex [K1; K14]; 1xTMT6plex [N-Term]	1	1	6	W5PTE9	W5PTE9 [135-148]	1	2167.34	14	5.85391e+06	6.04637e+06	6.05431e+06	7.43267e+06	9.68175e+06	8.93992e+06		2	1084.17	1.413e-08	4.25
[K].NQEDDLTETNLEQIDPIFGSK.[E]	1xDeamidated [Q13]; 1xTMT6plex [K21]; 1xTMT6plex [N-Term]	1	1	1	W5Q8K4	W5Q8K4 [213-233]	0	2865.44	21	199765	190500	256860	52893.7	40082.7	38817.6		3	955.823	1.69e-06	4.28
[K].NPFGNAGLLLGEAGK.[Q]	1xTMT6plex [K15]; 1xTMT6plex [N-Term]	1	1	4	W5PLW6	W5PLW6 [545-559]	0	1916.1	15	8.26302e+06	8.1357e+06	9.95418e+06	1.02505e+07	1.30121e+07	1.15261e+07		2	958.55	1.888e-06	3.47
[K].NQEDDLTETNLEQIDPIFGSK.[E]	1xTMT6plex [K21]; 1xTMT6plex [N-Term]	1	1	4	W5Q8K4	W5Q8K4 [213-233]	0	2864.46	21	1.05738e+06	880661	1.08992e+06	593100	604775	541551		3	955.488	6.815e-08	5.73
[R].NQDLAPNSAEQASILSLVTK.[I]	1xTMT6plex [K20]; 1xTMT6plex [N-Term]	1	1	3	W5NRN6	W5NRN6 [61-80]	0	2557.42	20	2.12407e+06	2.08726e+06	2.4993e+06	2.31776e+06	2.74724e+06	2.47574e+06		2	1279.21	1.068e-09	4.83
[K].NQDHSALQNLYMLSSTVSSK.[I]	1xTMT6plex [K20]; 1xTMT6plex [N-Term]	1	1	1	W5PJD0	W5PJD0 [333-352]	0	2681.4	20	1.05134e+06	932878	1.29326e+06	1.32027e+06	1.606e+06	1442843		3	894.464	7.788e-06	3.37
[K].NQDECVIALHDCNGDVNR.[A]	2xCarbamidomethyl [C5; C12]; 1xDeamidated [N13]; 1xTMT6plex [N-Term]	1	1	1	W5NVV3	W5NVV3 [64-81]	0	2359.06	18	68069.2	33819.8	56820.8	58501.4	76684.2	76327.3		3	787.027	7.788e-05	2.5
[R].NQDATVYVGGLDEK.[V]	1xTMT6plex [K14]; 1xTMT6plex [N-Term]	1	1	4	W5QHR6	W5QHR6 [10-23]	0	1967.05	14	1.95206e+06	1.98589e+06	2.24593e+06	2.67461e+06	2.13134e+06	2.19903e+06		2	984.026	1.477e-08	4.06
[K].NQCTQVVQER.[E]	1xCarbamidomethyl [C3]; 1xDeamidated [N/Q]; 1xTMT6plex [N-Term]	1	1	4	W5Q7Z7	W5Q7Z7 [1751-1760]	0	1491.74	10	4.08663e+06	3.81244e+06	4345809	4.14243e+06	4.50469e+06	4133707		2	746.376	9.414e-05	2.26
[K].NQALNTDNYGHDLASVQALQR.[K]	1xTMT6plex [N-Term]	1	1	3	W5PJ75	W5PJ75 [1253-1273]	0	2557.3	21	5.40272e+06	4.32211e+06	5.86318e+06	5.96612e+06	6.54817e+06	5.74714e+06		3	853.103	1.074e-07	5.99
[R].KGHAVGDIPGVR.[F]	1xTMT6plex [K1]; 1xTMT6plex [N-Term]	1	2	6	W5Q1N8	W5Q1N8 [138-149]	1	1664	12	1.37059e+07	1.36241e+07	1.60236e+07	1.49501e+07	1.77713e+07	1.78209e+07		3	555.335	2.603e-05	3.04
[K].KGGVASGFK.[H]	2xTMT6plex [K1; K9]; 1xTMT6plex [N-Term]	1	2	4	F2YQ13	F2YQ13 [118-126]	1	1537.97	9	1.51675e+07	1.48889e+07	1.65969e+07	1.95789e+07	2.44829e+07	2.2826e+07		3	513.323	6.213e-05	3.1
[K].EQIDIIEGIK.[D]	1xTMT6plex [K10]; 1xTMT6plex [N-Term]	1	1	4	W5PL67	W5PL67 [191-200]	0	1615.97	10	3.5658e+06	3.35097e+06	4.46689e+06	4.30158e+06	5.08873e+06	5.01437e+06		2	808.487	3.366e-05	3.62
[K].NQAETIALEK.[E]	1xTMT6plex [K10]; 1xTMT6plex [N-Term]	1	1	3	W5PZ05	W5PZ05 [159-168]	0	1574.92	10	1.76555e+06	1.55107e+06	2.09029e+06	1.70839e+06	1.96996e+06	1.9408e+06		2	787.959	5.411e-05	2.91
[R].NPYYGGESASITPLEDLYK.[R]	1xTMT6plex [K19]; 1xTMT6plex [N-Term]	1	2	3	W5PE22	W5PE22 [21-39]	0	2575.33	19	4.12205e+06	3.84424e+06	4.6404e+06	4.78438e+06	5.14653e+06	4.82174e+06		2	1288.16	8.905e-09	3.95
[K].KGHHEAEVK.[H]	2xTMT6plex [K1; K9]; 1xTMT6plex [N-Term]	1	1	1	P02190	P02190 [80-88]	1	1722.03	9	1.90665e+06	2.92345e+06	13283813	2.03623e+06	2066163	2.21261e+06		3	574.678	3.048e-05	3.22
[R].EQLQTEQDAPAAAR.[Q]	1xTMT6plex [N-Term]	1	1	2	W5P009	W5P009 [69-82]	0	1756.9	14	410204	340718	748174	425836	506975	414360		2	878.955	2.584e-05	2.74
[R].NPEISHMLNNPDIMR.[Q]	1xTMT6plex [N-Term]	1	2	3	C5ISB7	C5ISB7 [222-236]	0	2010.01	15	3.96532e+06	3.4596e+06	4.15848e+06	3.96893e+06	4.88293e+06	3.96228e+06		2	1005.51	1.442e-07	3.8
[K].EQISDIDDAVR.[K]	1xTMT6plex [N-Term]	1	1	6	W5PRF0	W5PRF0 [115-125]	0	1489.77	11	1.30536e+06	1.36172e+06	1.47096e+06	1.26387e+06	1.45593e+06	1.30665e+06		2	745.39	3.673e-06	2.92
[R].LEEGPPVTTVLTR.[E]	1xTMT6plex [N-Term]	1	3	5	W5PYS5	W5PYS5 [46-58]	0	1640.94	13	1.41364e+07	1.25525e+07	1.47119e+07	1.53876e+07	1.808e+07	1.50356e+07		2	820.97	4.162e-05	3.55
[R].EQQAQVEKEDFSDMVAEHAAK.[Q]	2xTMT6plex [K8; K21]; 1xTMT6plex [N-Term]	2	2	4	W5NVP5; W5NVP7	W5NVP5 [831-851]; W5NVP7 [690-710]	1	3077.58	21	4.91316e+06	4.9756e+06	5.79857e+06	5576494	6.6267e+06	5.75909e+06	Shared	4	770.15	9.661e-07	4.64
[R].NNVILQPLQPDTPYK.[I]	1xTMT6plex [K15]; 1xTMT6plex [N-Term]	1	1	4	W5P8W6	W5P8W6 [2082-2096]	0	2198.26	15	6.546e+06	6.38873e+06	7.46e+06	7.34864e+06	9.64456e+06	8.6978e+06		2	1099.63	2.871e-05	4.18
[K].EQQASMEEK.[F]	1xTMT6plex [K9]; 1xTMT6plex [N-Term]	1	1	7	W5P9L8	W5P9L8 [266-274]	0	1537.79	9	2.36942e+06	2.30797e+06	2.39571e+06	2.24463e+06	2758586	2.16045e+06		2	769.399	9.932e-05	2.82
[K].EQQCVIMGESSK.[T]	1xCarbamidomethyl [C4]; 1xTMT6plex [K12]; 1xTMT6plex [N-Term]	1	1	4	W5P3R3	W5P3R3 [77-88]	0	1853.95	12	5983385	4983494	6.58308e+06	6.22741e+06	6.95674e+06	5.89069e+06		2	927.478	2.962e-06	3.71
[R].NNVESVSQTSSSTFEYITQLK.[N]	1xTMT6plex [K21]; 1xTMT6plex [N-Term]	1	2	6	W5NQ46	W5NQ46 [135-155]	0	2820.47	21	8.51213e+06	6.96801e+06	9.01482e+06	1.08118e+07	1.12261e+07	9.62947e+06		2	1410.73	1.835e-10	5.44
[R].EQQELELGPGPQAEK.[G]	1xTMT6plex [K15]; 1xTMT6plex [N-Term]	1	1	1	W5PZ26	W5PZ26 [271-285]	0	2111.14	15	152011	145327	142161	144449	169350	150060		3	704.383	5.467e-06	2.63
[K].NNTVTPGGKPNK.[T]	2xTMT6plex [K9; K12]; 1xTMT6plex [N-Term]	1	4	10	W5PFD9	W5PFD9 [55-66]	0	1914.14	12	4.90683e+07	5.15238e+07	5.54556e+07	5.30411e+07	6.28214e+07	5.73447e+07		3	638.716	4.242e-05	2.23
[R].EQQHFLQDCHELK.[L]	1xCarbamidomethyl [C9]; 1xTMT6plex [K13]; 1xTMT6plex [N-Term]	1	1	3	W5PDN3	W5PDN3 [1258-1270]	0	2170.11	13	2.5037e+06	2.44671e+06	2.80534e+06	3.29578e+06	3.92819e+06	3.2318e+06		4	543.281	5.872e-06	4.39
[R].EQQHFLQDCHELK.[L]	1xCarbamidomethyl [C9]; 1xDeamidated [Q7]; 1xTMT6plex [K13]; 1xTMT6plex [N-Term]	1	1	4	W5PDN3	W5PDN3 [1258-1270]	0	2171.1	13	1.61099e+06	1.60966e+06	1.72189e+06	2.11923e+06	2.41465e+06	1.99825e+06		4	543.534	1.499e-05	2.97
[R].NNTCFVDAVAELAR.[R]	1xCarbamidomethyl [C4]; 1xDeamidated [N]; 1xTMT6plex [N-Term]	1	2	5	O02849	O02849 [315-328]	0	1809.9	14	3.19744e+06	2.90213e+06	3.55993e+06	3.38723e+06	3.61867e+06	3.2947e+06		2	905.449	6.018e-06	2.78
[R].NNVLNISILSPANAPIGR.[Y]	1xTMT6plex [N-Term]	1	1	4	W5PB04	W5PB04 [92-109]	0	2092.21	18	4.18544e+06	3.76359e+06	4.81269e+06	4.5415e+06	4.64892e+06	4.40767e+06		2	1046.6	1.526e-08	5.29
[R].NNTCFVDAVAELAR.[R]	1xCarbamidomethyl [C4]; 1xTMT6plex [N-Term]	1	2	4	O02849	O02849 [315-328]	0	1808.92	14	8.80776e+06	7.89432e+06	9.40147e+06	8.17003e+06	9.02027e+06	8.20294e+06		2	904.958	7.319e-07	3.86
[R].NNSGEEFDCAFR.[L]	1xCarbamidomethyl [C9]; 1xTMT6plex [N-Term]	1	1	4	W5Q0A6	W5Q0A6 [597-608]	0	1674.74	12	1.51468e+06	1.0905e+06	1.52497e+06	1.30522e+06	1.49345e+06	1.3885e+06		2	837.873	6.498e-06	2.56
[R].EQQIVIQSSGGLSK.[D]	1xTMT6plex [K14]; 1xTMT6plex [N-Term]	1	1	2	W5Q4W8	W5Q4W8 [542-555]	0	1932.12	14	6.45681e+06	5.73295e+06	7.27695e+06	8.64869e+06	1.01686e+07	9.7214e+06		2	966.554	1.489e-06	4.1
[R].IEEGVPQFLVLISSGK.[S]	1xTMT6plex [K16]; 1xTMT6plex [N-Term]	1	1	9	W5QCP9	W5QCP9 [1311-1326]	0	2174.28	16	7.4816e+06	7.88719e+06	7.29965e+06	7.09239e+06	8.35087e+06	7.78891e+06		2	1087.64	1.684e-09	5.39
[K].NNRPSEGPLQTR.[L]	1xTMT6plex [N-Term]	1	1	4	W5PUT6	W5PUT6 [575-586]	0	1597.86	12	6.91761e+06	6.1706e+06	7.42775e+06	6.96273e+06	8.1238e+06	7.5285e+06		3	533.289	3.18e-05	3.57
[R].IEEGVPQLLIVLTADR.[S]	1xTMT6plex [N-Term]	1	1	8	W5QCP9	W5QCP9 [1107-1122]	0	1995.17	16	3.08882e+07	3.42043e+07	2.87081e+07	2.87137e+07	3.38638e+07	3.02968e+07		2	998.08	8.127e-09	4.1
[K].KGESQTDIEITR.[E]	1xTMT6plex [K1]; 1xTMT6plex [N-Term]	1	1	2	W5P765	W5P765 [281-292]	1	1835.03	12	8.59097e+06	8.17017e+06	8.87025e+06	1.03422e+07	1.2285e+07	1.02021e+07		3	612.348	8.785e-05	3.41
[K].EQSELVAQALK.[V]	1xTMT6plex [K11]; 1xTMT6plex [N-Term]	1	1	3	W5PGX8	W5PGX8 [2120-2130]	0	1673.98	11	4.78019e+06	3.72915e+06	5.58421e+06	4.4154e+06	5.36127e+06	5.15984e+06		2	837.494	3.149e-05	3.28
[K].EQSELVDLAENIQQK.[L]	1xTMT6plex [K15]; 1xTMT6plex [N-Term]	1	1	1	W5PCR8	W5PCR8 [125-139]	0	2202.2	15	93676.6	74521.2	128830	107354	95894	94669.5		3	734.74	8.23e-06	3.4
[K].EQSELVDLAENIQQK.[L]	1xDeamidated [N11]; 1xTMT6plex [K15]; 1xTMT6plex [N-Term]	1	1	1	W5PCR8	W5PCR8 [125-139]	0	2203.19	15	253723	207267	273332	270771	295092	299922		3	735.071	4.027e-05	2.96
[R].NNQIDHIDEK.[A]	1xDeamidated [N/Q]; 1xTMT6plex [K10]; 1xTMT6plex [N-Term]	1	1	54	W5Q2E1	W5Q2E1 [79-88]	0	1684.89	10	3.57964e+07	3.4008e+07	3.39513e+07	3.2109e+07	3.86533e+07	3.12177e+07		2	842.946	1.227e-05	2.88
[R].NNQIDHIDEK.[A]	1xTMT6plex [K10]; 1xTMT6plex [N-Term]	1	1	71	W5Q2E1	W5Q2E1 [79-88]	0	1683.91	10	3.22471e+08	3.06545e+08	2.87984e+08	2.89571e+08	3.59169e+08	2.71979e+08		2	842.455	1.753e-05	3.79
[R].NNSLQTATENTQAR.[V]	1xTMT6plex [N-Term]	1	1	3	W5P8S7	W5P8S7 [618-631]	0	1776.9	14	934918	938173	1.03835e+06	1.07175e+06	1.22495e+06	1.12569e+06		2	888.957	5.188e-06	3.57
[R].EQFWPAVCEHFGVEATGEESSIR.[Q]	1xCarbamidomethyl [C8]; 1xTMT6plex [N-Term]	1	1	1	W5PVE3	W5PVE3 [229-251]	0	2894.36	23	496482	472635	636032	653322	607258	637660		3	965.457	7.275e-05	2.05
[R].NNVSLLQSCIDLFK.[N]	1xCarbamidomethyl [C9]; 1xTMT6plex [K14]; 1xTMT6plex [N-Term]	1	1	1	W5Q9H8	W5Q9H8 [389-402]	0	2109.18	14	2.78293e+06	2688951	3.02472e+06	2.69994e+06	3.14265e+06	2.9359e+06		2	1055.09	2.437e-05	3.99
[K].EQQALQTVCLK.[G]	1xCarbamidomethyl [C9]; 1xTMT6plex [K11]; 1xTMT6plex [N-Term]	1	1	3	W5PN97	W5PN97 [66-76]	0	1776.01	11	7.07412e+06	5.50449e+06	7.6476e+06	6.8262e+06	8.05916e+06	6.63875e+06		2	888.502	6.714e-06	4.37
[K].EQLSDMMMLNK.[Q]	1xTMT6plex [K11]; 1xTMT6plex [N-Term]	1	1	4	W5PU66	W5PU66 [996-1006]	0	1797.93	11	8694098	8.44647e+06	9.05114e+06	11420135	1.35552e+07	12409498		2	899.465	6.886e-06	4.58
[R].KGFSEGLWEIENNPTVK.[A]	2xTMT6plex [K1; K17]; 1xTMT6plex [N-Term]	1	1	2	W5P8R3	W5P8R3 [53-69]	1	2635.47	17	1.91512e+06	1.77858e+06	2.39022e+06	2.1852e+06	2.54082e+06	2.29879e+06		3	879.157	2.717e-05	3.36
[R].NPDNDENGPWCYTTDPDKR.[F]	1xCarbamidomethyl [C11]; 1xDeamidated [N7]; 1xTMT6plex [K18]; 1xTMT6plex [N-Term]	1	1	3	W5P3R3	W5P3R3 [161-179]	1	2753.25	19	717854	561248	765819	757575	711117	683699		3	918.42	6.81e-07	3.63
[K].NPDGTMNLMNWECAIPGK.[K]	1xCarbamidomethyl [C13]; 1xTMT6plex [K18]; 1xTMT6plex [N-Term]	1	2	1	W5PZM2	W5PZM2 [89-106]	0	2506.23	18	1.4614e+06	1393345	1.42197e+06	1.52054e+06	1.67704e+06	1.72886e+06		2	1253.61	2.195e-07	4.75
[R].LEEEQQLQK.[Q]	1xTMT6plex [K9]; 1xTMT6plex [N-Term]	2	2	17	P22793; W5QIV5	P22793 [235-243]; W5QIV5 [235-243]	0	1602.91	9	5.79331e+07	4.62114e+07	6.16773e+07	5.32132e+07	6.20994e+07	5.48415e+07	Shared	2	801.957	7.28e-05	3.75
[K].EQIVPKPEEEVAQK.[K]	2xTMT6plex [K6; K14]; 1xTMT6plex [N-Term]	1	13	10	W5Q9T9	W5Q9T9 [156-169]	0	2311.35	14	4.47386e+07	4.22194e+07	5.06002e+07	4.54685e+07	5.2413e+07	4.85905e+07		3	771.116	2.854e-06	3.38
[R].NPDGDVNGPWCYTTNPR.[K]	1xCarbamidomethyl [C11]; 1xDeamidated [N7]; 1xTMT6plex [N-Term]	1	2	1	W5P3R3	W5P3R3 [540-556]	0	2192.99	17	166481	118608	198375	171067	125162	142610		2	1097	9.993e-05	3.01
[R].EQLWLANEGLITK.[L]	1xTMT6plex [K13]; 1xTMT6plex [N-Term]	1	1	6	W5PU66	W5PU66 [792-804]	0	1973.15	13	8.20145e+06	7.8392e+06	9.15723e+06	9.75272e+06	1.20264e+07	1.11347e+07		2	987.068	3.005e-07	3.63
[R].KGFNEGLWEIENNPGVK.[F]	1xDeamidated [N12]; 2xTMT6plex [K1; K17]; 1xTMT6plex [N-Term]	1	1	1	W5PXI2	W5PXI2 [61-77]	1	2619.44	17	1.70454e+06	1.82916e+06	1.82752e+06	1836929	1.99565e+06	1.72595e+06		3	873.823	1.018e-05	4.46
[K].EQMAQQLAQETQGFQR.[T]	1xTMT6plex [N-Term]	1	1	1	W5Q2U7	W5Q2U7 [2187-2202]	0	2122.05	16	473704	457994	583571	636404	753048	638321		3	708.021	3.094e-05	4.22
[R].EQMEAEIAHLK.[Q]	1xTMT6plex [K11]; 1xTMT6plex [N-Term]	1	2	5	W5QIX0	W5QIX0 [413-423]	0	1756.97	11	3.6236e+06	3.62224e+06	4.17911e+06	4.46618e+06	5.22447e+06	4.55186e+06		3	586.326	1.095e-05	2.36
[K].NNVTPDMMEEMYK.[K]	1xTMT6plex [K13]; 1xTMT6plex [N-Term]	1	6	3	W5Q4R6	W5Q4R6 [230-242]	0	2059.99	13	4.89384e+06	4.48869e+06	4.67514e+06	5.22404e+06	6.0187e+06	5.72107e+06		2	1030.5	5.147e-06	3.81
[K].NPDDPDTVDIIMHMLDR.[D]	1xDeamidated [N1]; 1xTMT6plex [N-Term]	1	1	1	W5QIW7	W5QIW7 [47-63]	0	2227.06	17	61869.2	69437.1	63732.7	97635.6	105849	88474.3		3	743.026	3.942e-05	3.15
[R].NPDDITQEEYGEFYK.[S]	1xTMT6plex [K15]; 1xTMT6plex [N-Term]	1	1	10	W5PHW0	W5PHW0 [292-306]	0	2306.12	15	1.15955e+07	9.24676e+06	1.30134e+07	1.06661e+07	1.14567e+07	1.04958e+07		2	1153.57	5.458e-08	3.9
[R].NPDDITNEEYGEFYK.[S]	1xDeamidated [N7]; 1xTMT6plex [K15]; 1xTMT6plex [N-Term]	1	3	3	A8DR93	A8DR93 [301-315]	0	2293.09	15	1.12194e+06	987339	1.27774e+06	1.37592e+06	1326613	1.32924e+06		2	1147.05	8.243e-06	3.31
[R].NPDDITNEEYGEFYK.[S]	1xTMT6plex [K15]; 1xTMT6plex [N-Term]	1	3	16	A8DR93	A8DR93 [301-315]	0	2292.11	15	1.43185e+07	1.24431e+07	1.60943e+07	1.47706e+07	1.51798e+07	1.43207e+07		2	1146.56	1.351e-07	4.12
[K].NPCYVDDNCDPQTVANR.[V]	2xCarbamidomethyl [C3; C9]; 1xTMT6plex [N-Term]	1	1	8	W5PX92	W5PX92 [147-163]	0	2267	17	2.97026e+06	2.64219e+06	3.05999e+06	3.05381e+06	3.37199e+06	3.06626e+06		2	1134	9.948e-05	2.72
[R].EQPEKEPELQQYVPQLQNNTILR.[L]	1xTMT6plex [K5]; 1xTMT6plex [N-Term]	1	1	3	W5NRL8	W5NRL8 [400-422]	1	3252.76	23	3.02826e+06	2.70291e+06	3.41645e+06	3.50866e+06	3.85526e+06	3.64662e+06		3	1084.93	9.33e-08	5.24
[R].NPCQDPYVLTSENR.[C]	1xCarbamidomethyl [C3]; 1xTMT6plex [N-Term]	1	1	4	W5NVG2	W5NVG2 [360-373]	0	1921.93	14	1.92147e+06	1.84554e+06	2.3384e+06	2.08878e+06	2.31112e+06	2.16388e+06		2	961.466	5.436e-05	2.14
[R].NPAVLSAASFDGR.[I]	1xTMT6plex [N-Term]	1	2	4	W5NU08	W5NU08 [315-327]	0	1533.82	13	7.35556e+06	7.22032e+06	8.22519e+06	9.17573e+06	1.08858e+07	1.03665e+07		2	767.409	7.968e-06	2.75
[K].NPATVSQDSER.[K]	1xTMT6plex [N-Term]	1	1	1	W5NRM4	W5NRM4 [286-296]	0	1432.72	11	948125	949896	1.02065e+06	1.07267e+06	1.16599e+06	1.13442e+06		2	716.866	4.968e-05	2.62
[R].IEEGMDQINK.[D]	1xTMT6plex [K10]; 1xTMT6plex [N-Term]	1	2	3	W5QH64	W5QH64 [55-64]	0	1634.88	10	3.52619e+06	3.25051e+06	4.2777e+06	3.7878e+06	4.58216e+06	4.01524e+06		2	817.939	7.022e-05	3.99
[K].NPAILEASAGAIQNLCAGR.[W]	1xCarbamidomethyl [C16]; 1xTMT6plex [N-Term]	1	1	2	W5PLW1	W5PLW1 [688-706]	0	2155.15	19	2.50908e+06	2.21884e+06	2.9435e+06	2.79731e+06	3201765	2.92009e+06		2	1078.07	3.615e-08	4.21
[K].NNVTPDMMEEMYK.[K]	1xDeamidated [N1]; 1xTMT6plex [K13]; 1xTMT6plex [N-Term]	1	6	3	W5Q4R6	W5Q4R6 [230-242]	0	2060.97	13	824394	784105	780355	868711	981529	936357		2	1030.99	1.41e-05	3.58
[K].NPDDPDTVDIIMHMLDR.[D]	1xTMT6plex [N-Term]	1	1	4	W5QIW7	W5QIW7 [47-63]	0	2226.07	17	1.19876e+06	1.38806e+06	1.1503e+06	2.08121e+06	2.42293e+06	2.1111e+06		3	742.69	1.88e-08	6.15
[K].NLTEQNYTNIPHEGK.[H]	1xTMT6plex [K15]; 1xTMT6plex [N-Term]	1	1	1	W5PDX8	W5PDX8 [388-402]	0	2216.17	15	882290	756090	957653	878183	977297	932301		3	739.391	2.77e-05	4.5
[R].ENLLLSDSPSCK.[E]	1xCarbamidomethyl [C11]; 1xTMT6plex [K12]; 1xTMT6plex [N-Term]	1	1	2	W5Q2Y6	W5Q2Y6 [381-392]	0	1820.98	12	1.14683e+06	1.0931e+06	1.24548e+06	1.16512e+06	1.34309e+06	1.19528e+06		2	910.99	4.8e-05	3.11
[R].NTTGVTEEALK.[E]	1xDeamidated [N1]; 1xTMT6plex [K11]; 1xTMT6plex [N-Term]	1	1	4	W5NV97	W5NV97 [83-93]	0	1621.9	11	2.45241e+06	2.28856e+06	2.90108e+06	2.33638e+06	2.78065e+06	2.35288e+06		2	811.454	7.907e-06	3.31
[K].QDLEAEVSQLTGEVAK.[L]	1xTMT6plex [K16]; 1xTMT6plex [N-Term]	1	1	4	W5NR71	W5NR71 [526-541]	0	2175.19	16	621446	568277	688237	854379	995756	753330		3	725.736	6.563e-07	4.02
[R].QDIAVISDSYFPR.[Y]	1xTMT6plex [N-Term]	1	1	3	W5QD08	W5QD08 [544-556]	0	1739.92	13	1.53172e+06	1.51513e+06	1.71679e+06	1.61025e+06	1.70306e+06	1.57849e+06		2	870.459	1.89e-06	3.61
[R].ELQVLSEQYSQK.[C]	1xTMT6plex [K12]; 1xTMT6plex [N-Term]	1	1	1	W5PXC5	W5PXC5 [1821-1832]	0	1910.06	12	770968	751196	916547	990729	985595	937567		2	955.529	4.776e-05	3.25
[R].KKVEAQLQELQVK.[F]	3xTMT6plex [K1; K2; K13]; 1xTMT6plex [N-Term]	1	1	5	W5QBQ9	W5QBQ9 [1250-1262]	2	2457.56	13	7.07947e+06	6.63119e+06	8.55885e+06	8.27863e+06	1.07043e+07	1.00021e+07		3	819.851	2.217e-05	3.23
[R].QDLADVVQVCEGR.[K]	1xCarbamidomethyl [C10]; 1xTMT6plex [N-Term]	1	1	8	W5NYP8	W5NYP8 [4411-4423]	0	1717.87	13	1.31297e+06	1.10589e+06	1.38033e+06	1.40659e+06	1.56105e+06	1.47165e+06		2	859.441	1e-05	3.15
[K].KKVDDDLGTIESLEEAK.[K]	3xTMT6plex [K1; K2; K17]; 1xTMT6plex [N-Term]	1	1	3	W5NU63	W5NU63 [1378-1394]	2	2806.62	17	2.72648e+06	2.61026e+06	2.92164e+06	2.39148e+06	2.68798e+06	2.58963e+06		4	702.409	9.478e-06	5.77
[K].EIRPALELLEPIEQK.[F]	1xTMT6plex [K15]; 1xTMT6plex [N-Term]	1	2	8	W5PE22	W5PE22 [350-364]	0	2236.33	15	1.27426e+07	1.20793e+07	1.49258e+07	1.72489e+07	2.01704e+07	1.84018e+07		3	746.111	8.108e-06	5.63
[R].QDGQVTGSTENLISPSSR.[T]	1xDeamidated [N11]; 1xTMT6plex [N-Term]	1	2	2	W5Q5D1	W5Q5D1 [564-581]	0	2106.05	18	189917	185004	170261	202217	245348	206621		3	702.693	3.162e-06	3.75
[R].IEDGVPQHLVLFLGGR.[S]	1xTMT6plex [N-Term]	1	1	11	W5QCP9	W5QCP9 [1515-1530]	0	1979.13	16	1.05484e+07	1.02122e+07	1.14368e+07	1.296e+07	1.43127e+07	1.2689e+07		2	990.06	1.924e-07	3.08
[K].QDGQFSVLFTK.[C]	1xTMT6plex [K11]; 1xTMT6plex [N-Term]	1	2	21	W5QH56	W5QH56 [180-190]	0	1727.97	11	9.46455e+07	8.52878e+07	8.33216e+07	4.43524e+07	5.01022e+07	4.11288e+07		2	864.491	3.806e-06	2.77
[K].ELSCTELQELK.[Q]	1xCarbamidomethyl [C4]; 1xTMT6plex [K11]; 1xTMT6plex [N-Term]	1	1	2	W5QB04	W5QB04 [26-36]	0	1807.99	11	1.16216e+06	1.0389e+06	1.22149e+06	1.21336e+06	1.34767e+06	1.26013e+06		2	904.493	0.0001073	2.71
[R].EISDAQWEDVVQK.[A]	1xTMT6plex [K13]; 1xTMT6plex [N-Term]	1	1	3	W5P449	W5P449 [167-179]	0	2005.06	13	1.11219e+06	1.0107e+06	1.343e+06	1.18334e+06	1.51854e+06	1.1885e+06		2	1003.03	5.096e-07	4.32
[K].QDGECGTLSKDELK.[E]	1xCarbamidomethyl [C5]; 2xTMT6plex [K10; K14]; 1xTMT6plex [N-Term]	1	1	11	W5QIW7	W5QIW7 [21-34]	1	2267.22	14	3.27721e+07	3.89277e+07	3.27072e+07	5.0186e+07	6.26379e+07	5.56857e+07		3	756.407	8.429e-06	3.48
[R].ELSDFISYLK.[R]	1xTMT6plex [K10]; 1xTMT6plex [N-Term]	1	2	3	C6JUQ0	C6JUQ0 [472-481]	0	1672.96	10	4.56319e+06	4.04866e+06	5.02646e+06	4.22722e+06	4746090	3.95436e+06		2	836.976	2.989e-05	3.58
[K].EISDGDVIISGNR.[N]	1xTMT6plex [N-Term]	1	1	2	W5PWC5	W5PWC5 [402-414]	0	1603.85	13	678046	656989	804134	722219	884833	772867		2	802.429	1.079e-06	3.77
[K].QDGECGTLSK.[D]	1xCarbamidomethyl [C5]; 1xTMT6plex [K10]; 1xTMT6plex [N-Term]	1	1	4	W5QIW7	W5QIW7 [21-30]	0	1552.8	10	4.59631e+06	5.21041e+06	4.11338e+06	6.90465e+06	8.76217e+06	7.67418e+06		2	776.901	5.731e-05	3.24
[K].ELSDIEDLMK.[R]	1xTMT6plex [K10]; 1xTMT6plex [N-Term]	2	2	4	A0A5C2D147; W5PP77	A0A5C2D147 [154-163]; W5PP77 [394-403]	0	1650.9	10	8.30189e+06	7.50618e+06	9.85046e+06	9.96903e+06	1.15442e+07	1.10855e+07	Shared	2	825.952	7.887e-06	3.48
[K].QDFESIDESEDIESLIPK.[G]	1xTMT6plex [K18]; 1xTMT6plex [N-Term]	1	1	2	W5NWH4	W5NWH4 [288-305]	0	2552.3	18	140772	117814	135191	177378	193290	172416		3	851.442	5.048e-05	2.67
[R].LEDLATLIQK.[I]	1xTMT6plex [K10]; 1xTMT6plex [N-Term]	1	2	1	W5PX99	W5PX99 [704-713]	0	1601.99	10	208408	207538	208978	258530	306799	281701		2	801.492	1.192e-05	3.63
[K].LEDLCSWVGQAER.[A]	1xCarbamidomethyl [C5]; 1xTMT6plex [N-Term]	1	1	2	W5QFK2	W5QFK2 [3536-3548]	0	1791.89	13	1.44521e+06	1222093	1.60315e+06	1.70105e+06	1.87442e+06	1.86905e+06		2	896.442	7.214e-06	3
[K].QDELMSDISK.[R]	1xTMT6plex [K10]; 1xTMT6plex [N-Term]	1	1	3	W5PFX4	W5PFX4 [693-702]	0	1623.87	10	915431	863274	993378	956521	1.25105e+06	1.11299e+06		2	812.433	6.753e-05	2.82
[R].LEDLEVVQQR.[F]	1xTMT6plex [N-Term]	1	1	6	W5PDN3	W5PDN3 [863-872]	0	1457.82	10	794368	773433	880430	943040	1.14951e+06	1.00294e+06		2	729.41	8.233e-05	2.74
[R].QDAQSLLAPGK.[S]	1xTMT6plex [K11]; 1xTMT6plex [N-Term]	1	1	1	W5QB58	W5QB58 [323-333]	0	1585.93	11	1.2583e+06	1.27049e+06	1.5215e+06	1706380	1.93784e+06	1.81065e+06		2	793.463	3.906e-05	3.85
[R].IEDGNNFGVAVQEK.[V]	1xDeamidated [N5]; 1xTMT6plex [K14]; 1xTMT6plex [N-Term]	1	1	6	W5QD49	W5QD49 [142-155]	0	1979.05	14	2.89492e+06	2.70903e+06	3.41248e+06	3.29055e+06	3.71102e+06	3.47543e+06		2	990.031	1.948e-06	3.36
[R].QDLGSPEGIALDHLGR.[N]	1xTMT6plex [N-Term]	1	1	9	W5P094	W5P094 [1013-1028]	0	1907.02	16	8.19931e+06	7.64333e+06	8.39123e+06	8.12527e+06	9.62588e+06	8.85567e+06		3	636.34	9.154e-06	5.27
[R].QDILDDSGYVSAYK.[N]	1xTMT6plex [K14]; 1xTMT6plex [N-Term]	1	1	2	W5NYA4	W5NYA4 [164-177]	0	2032.06	14	2.3662e+06	2.39644e+06	2.46115e+06	2.43568e+06	2.62456e+06	2.42475e+06		2	1016.53	1.899e-06	4.75
[K].QDIIITALDNVEAR.[R]	1xTMT6plex [N-Term]	1	1	1	W5PBH2	W5PBH2 [561-574]	0	1800.01	14	98970	88550.5	91291.9	127554	139970	114963		3	600.67	4.296e-05	4.39
[K].ELQLHGNHLEYIPDGVFDHLVGLTK.[L]	1xTMT6plex [K25]; 1xTMT6plex [N-Term]	1	1	2	W5NVT0	W5NVT0 [153-177]	0	3302.79	25	4.59346e+06	4371619	5.30278e+06	6.24653e+06	7.52461e+06	7.73476e+06		4	826.446	5.841e-05	3.82
[R].QDSCAVGFDYK.[E]	1xCarbamidomethyl [C4]; 1xTMT6plex [K11]; 1xTMT6plex [N-Term]	1	1	2	W5NQM5	W5NQM5 [253-263]	0	1747.87	11	2.77374e+06	2.19608e+06	5.10171e+06	2.88837e+06	3.02753e+06	2.62602e+06		2	874.433	1.863e-05	1.79
[R].ELQNAPDAIPESGVEPPPLDTAWVEATR.[K]	1xTMT6plex [N-Term]	1	1	3	W5Q7E2	W5Q7E2 [98-125]	0	3231.64	28	245896	178156	308140	269655	308781	295452		3	1077.88	4.552e-06	3.78
[K].IEDGNDFGVAIQEK.[V]	1xTMT6plex [K14]; 1xTMT6plex [N-Term]	1	1	8	W5QD41	W5QD41 [132-145]	0	1993.06	14	2.63808e+06	2.28369e+06	2.93772e+06	3.01383e+06	3.9468e+06	3.49444e+06		2	997.036	7.178e-09	4
[R].ELQNLLVEER.[L]	1xTMT6plex [N-Term]	1	2	10	W5PP36	W5PP36 [105-114]	0	1471.83	10	2.82934e+06	2.67251e+06	3.7245e+06	3.99352e+06	3.4323e+06	3.39599e+06		2	736.423	4.6e-05	3.31
[R].ELQNTVANLHVR.[E]	1xTMT6plex [N-Term]	1	1	2	W5NYA8	W5NYA8 [177-188]	0	1622.92	12	1.36832e+06	1.53902e+06	1.66362e+06	1.58411e+06	1.81891e+06	1.66828e+06		2	811.956	6.22e-06	3.83
[R].QDNTEELWLLHSNIDAIDKR.[R]	1xTMT6plex [K19]; 1xTMT6plex [N-Term]	1	1	1	W5Q0P4	W5Q0P4 [42-61]	1	2868.53	20	595656	517266	688053	753521	819032	726519		4	717.881	6.626e-05	2.9
[K].QDMPNAMPVSELTDK.[L]	1xTMT6plex [K15]; 1xTMT6plex [N-Term]	1	2	3	C5IWS9	C5IWS9 [128-142]	0	2134.09	15	1.60584e+06	1.48035e+06	1.75117e+06	2.06385e+06	2.36204e+06	2.32368e+06		2	1067.54	1.327e-05	2.87
[R].ELQQAVLQMEQR.[K]	1xTMT6plex [N-Term]	1	1	6	W5PS94	W5PS94 [388-399]	0	1701.92	12	3.53339e+06	3.97001e+06	6.61861e+06	3.83488e+06	3.48328e+06	2.79669e+06		2	851.454	4.75e-06	4.21
[K].QDMACLLK.[E]	1xCarbamidomethyl [C5]; 1xTMT6plex [K8]; 1xTMT6plex [N-Term]	7	16	19	P15241; E3VW87; W5Q6H2; Q4U200; W5Q6A0; Q28582; P25691	P15241 [383-390]; E3VW87 [380-387]; W5Q6H2 [392-399]; Q4U200 [47-54]; W5Q6A0 [399-406]; Q28582 [381-388]; P25691 [396-403]	0	1436.8	8	3.73437e+08	3.01367e+08	3.68422e+08	5.49756e+08	6.38231e+08	5.5912e+08	Shared	2	718.906	8.768e-05	2.47
[K].QDLPPLDEKPR.[N]	1xTMT6plex [K9]; 1xTMT6plex [N-Term]	1	1	3	W5Q334	W5Q334 [368-378]	0	1766.02	11	3.68978e+06	3.47664e+06	4.06552e+06	4.0812e+06	4.84582e+06	4.34703e+06		3	589.342	9.398e-05	2.98
[K].ELSELIEQLQK.[N]	1xTMT6plex [K11]; 1xTMT6plex [N-Term]	1	1	5	W5P352	W5P352 [8-18]	0	1788.05	11	2.89423e+06	2.75306e+06	3.43603e+06	3.4773e+06	3.93136e+06	3.65204e+06		2	894.522	2.428e-05	3.43
[-K].QDLPNAMNAAEITDK.[L]	1xOxidation [M7]; 1xTMT6plex [K15]; 1xTMT6plex [N-Term]	1	4	6	C5IWU0	C5IWU0 [128-142]	0	2105.09	15	2.39216e+06	2.1352e+06	3.12211e+06	2.39836e+06	2.93431e+06	2.51536e+06		3	702.368	8.954e-05	4.05
[-K].QDLPNAMNAAEITDK.[L]	1xTMT6plex [K15]; 1xTMT6plex [N-Term]	1	4	12	C5IWU0	C5IWU0 [128-142]	0	2089.1	15	1.21569e+07	1.00911e+07	1.21156e+07	1.16956e+07	1.42643e+07	1.25894e+07		2	1045.05	1.657e-09	4.87
[K].EIQSAFVSVLSENDELSQDVASK.[G]	1xTMT6plex [K23]; 1xTMT6plex [N-Term]	1	2	1	W5P9T6	W5P9T6 [980-1002]	0	2953.54	23	435450	376027	488739	509636	508711	477991		3	985.181	4.463e-08	5.73
[K].EIQSAFVSVLSENDELSQDVASK.[G]	1xDeamidated [N13]; 1xTMT6plex [K23]; 1xTMT6plex [N-Term]	1	2	1	W5P9T6	W5P9T6 [980-1002]	0	2954.52	23	485602	405768	577903	542383	561176	576460		3	985.514	5.58e-06	4.98
[K].ELQSEVSDMSVVLSMDNNR.[S]	1xTMT6plex [N-Term]	1	1	6	W5Q6V2	W5Q6V2 [222-240]	0	2382.15	19	623871	535790	694827	755925	837001	818404		2	1191.58	2.441e-08	4.18
[K].ELQSEVSDMSVVLSMDNNR.[S]	1xOxidation [M]; 1xTMT6plex [N-Term]	1	1	5	W5Q6V2	W5Q6V2 [222-240]	0	2398.14	19	557194	486598	626904	636581	696184	611337		3	800.05	5.688e-07	3.72
[K].QDLPNAMAISEMTDK.[L]	1xTMT6plex [K15]; 1xTMT6plex [N-Term]	1	1	9	C5IWT0	C5IWT0 [128-142]	0	2122.09	15	1.62551e+07	1.50217e+07	1.72078e+07	1.67387e+07	1.85775e+07	1.77407e+07		2	1061.55	2.952e-06	3.73
[K].QDLPDAMKPHEIQEK.[L]	2xTMT6plex [K8; K15]; 1xTMT6plex [N-Term]	1	1	7	C5IWU1	C5IWU1 [124-138]	0	2466.36	15	4.07669e+07	40731392	4.32829e+07	4.65404e+07	5.39512e+07	4.69951e+07		3	822.787	1.175e-06	3.72
[R].ELQSQIQEAR.[A]	1xTMT6plex [N-Term]	1	1	4	W5P9M4	W5P9M4 [82-91]	0	1430.78	10	1735805	1.68597e+06	1.92282e+06	1.702e+06	1.90733e+06	1.72858e+06		2	715.891	0.0001151	3.14
[R].IEDGNNFGVAVQEK.[V]	1xTMT6plex [K14]; 1xTMT6plex [N-Term]	1	1	10	W5QD49	W5QD49 [142-155]	0	1978.06	14	1.73154e+07	1.5148e+07	22861355	2.03763e+07	2.29826e+07	2.04309e+07		2	989.531	2.69e-08	4.85
[K].EIQSSNLETAMSVIGDR.[R]	1xTMT6plex [N-Term]	1	1	2	W5PNE9	W5PNE9 [57-73]	0	2079.06	17	490334	445411	550257	580795	643323	521307		2	1040.03	2.916e-08	3.6
[K].QDLPALEEKPR.[N]	1xTMT6plex [K9]; 1xTMT6plex [N-Term]	1	2	9	W5PVL5	W5PVL5 [186-196]	0	1754.02	11	1.08571e+07	9856923	1.17457e+07	1.08067e+07	1.21228e+07	1.07453e+07		3	585.343	7.918e-06	4.92
[-K].QDLPNAMNAAEITDK.[L]	1xDeamidated [N]; 1xTMT6plex [K15]; 1xTMT6plex [N-Term]	1	4	10	C5IWU0	C5IWU0 [128-142]	0	2090.08	15	2.30874e+06	1.99243e+06	2.58585e+06	2.48637e+06	2.89689e+06	2.49755e+06		2	1045.54	8.305e-06	3.4
[R].QDVDNASLAR.[L]	1xTMT6plex [N-Term]	2	3	35	K4P1S1; A4ZYA6	K4P1S1 [130-139]; A4ZYA6 [208-217]	0	1317.7	10	1.10767e+08	1.17433e+08	1.20611e+08	1.36698e+08	1.71379e+08	1.60261e+08	Shared	2	659.351	7.822e-06	3.38
[R].QDAQDLYEAGEK.[K]	1xTMT6plex [K12]; 1xTMT6plex [N-Term]	1	1	8	W5QEU6	W5QEU6 [174-185]	0	1824.94	12	4.82366e+06	4.57171e+06	5.06929e+06	4.92915e+06	5.6296e+06	5.20102e+06		2	912.971	1.166e-06	3.32
[R].QDADSVITVGR.[G]	1xTMT6plex [N-Term]	1	1	3	W5NPC7	W5NPC7 [351-361]	0	1389.75	11	2.62163e+06	2.26691e+06	2.9693e+06	2.74471e+06	3.64174e+06	2.90351e+06		2	695.38	4.229e-05	2.61
[K].ELTDGHFENILADNSVNDQTK.[I]	1xTMT6plex [K21]; 1xTMT6plex [N-Term]	1	1	12	W5P8T8	W5P8T8 [150-170]	0	2818.43	21	6.85203e+06	4.70798e+06	6.13512e+06	7.42535e+06	7.97145e+06	7.05712e+06		3	940.146	7.495e-09	6.28
[K].ELTDGHFENILADNSVNDQTK.[I]	1xDeamidated [N/Q]; 1xTMT6plex [K21]; 1xTMT6plex [N-Term]	1	1	12	W5P8T8	W5P8T8 [150-170]	0	2819.41	21	2.41751e+06	2.02825e+06	2.6077e+06	3.32489e+06	3.59912e+06	3.50872e+06		3	940.472	1.765e-07	3.89
[K].ELTDGHFENILADNSVNDQTK.[I]	2xDeamidated [N14; N17]; 1xTMT6plex [K21]; 1xTMT6plex [N-Term]	1	1	2	W5P8T8	W5P8T8 [150-170]	0	2820.39	21	248643	223245	277889	314386	326504	298067		3	940.808	6.796e-07	3.53
[R].QCCESNLEPLFEGYIETLR.[R]	2xCarbamidomethyl [C2; C3]; 2xDeamidated [Q1; N6]; 1xTMT6plex [N-Term]	1	4	2	P15241	P15241 [148-166]	0	2589.21	19	700305	650001	837515	823536	875436	837705		3	863.743	2.366e-05	3.11
[R].QCCESNLEPLFEGYIETLR.[R]	2xCarbamidomethyl [C2; C3]; 1xTMT6plex [N-Term]	1	4	10	P15241	P15241 [148-166]	0	2587.24	19	3.68412e+06	2.76307e+06	4.83396e+06	3.40563e+06	3.73601e+06	3.49187e+06		2	1294.11	7.411e-08	4.21
[K].QCASLQSAIADAEQRGELALK.[D]	1xCarbamidomethyl [C2]; 2xDeamidated [Q6; Q14]; 1xTMT6plex [K21]; 1xTMT6plex [N-Term]	1	1	1	W5Q6B8	W5Q6B8 [381-401]	1	2719.43	21	1.28564e+06	967650	1.57521e+06	921462	1.63195e+06	1.65859e+06		3	907.155	4.306e-06	3.34
[R].EITENLMATGDLDQDGK.[I]	1xTMT6plex [K17]; 1xTMT6plex [N-Term]	1	2	6	W5PDD0	W5PDD0 [53-69]	0	2308.17	17	1.70831e+06	1.39044e+06	1.83585e+06	2.07229e+06	2.52678e+06	2.26146e+06		2	1154.58	2.574e-06	2.84
[K].QCASLQSAIADAEQRGELALK.[D]	1xCarbamidomethyl [C2]; 1xTMT6plex [K21]; 1xTMT6plex [N-Term]	1	1	1	W5Q6B8	W5Q6B8 [381-401]	1	2717.47	21	1176579	906040	1.49016e+06	958174	1.54942e+06	1.52588e+06		3	906.49	2.404e-10	3.89
[R].EITENLMATGDLDQDGK.[I]	1xOxidation [M7]; 1xTMT6plex [K17]; 1xTMT6plex [N-Term]	1	2	1	W5PDD0	W5PDD0 [53-69]	0	2324.17	17	309074	294116	336888	377572	488111	448690		3	775.388	0.0001311	2.57
[R].ELTGEDVLVR.[A]	1xTMT6plex [N-Term]	1	1	7	W5P6M2	W5P6M2 [215-224]	0	1359.77	10	2.3498e+06	1.95841e+06	2.58396e+06	2.9445e+06	3.14449e+06	2.95985e+06		2	680.387	2.366e-05	3.13
[K].EITGIGPSTTTETETIAK.[Y]	1xTMT6plex [K18]; 1xTMT6plex [N-Term]	1	2	7	W5P5M8	W5P5M8 [256-273]	0	2307.27	18	1.04887e+07	6.64492e+06	1.05516e+07	7.53556e+06	8.00028e+06	7.7057e+06		2	1154.13	2.077e-09	5.35
[K].QCASLQSAIADAEQR.[G]	1xCarbamidomethyl [C2]; 1xDeamidated [Q]; 1xTMT6plex [N-Term]	1	1	9	W5Q6B8	W5Q6B8 [381-395]	0	1877.92	15	876834	693377	1.00766e+06	1.0721e+06	1.30863e+06	1.21992e+06		2	939.462	0.0001078	2.02
[K].QCASLQSAIADAEQR.[G]	1xCarbamidomethyl [C2]; 1xTMT6plex [N-Term]	1	1	25	W5Q6B8	W5Q6B8 [381-395]	0	1876.94	15	1.3902e+07	1.31838e+07	1.43587e+07	1.93317e+07	2.18988e+07	1.98386e+07		2	938.977	1.224e-09	3.93
[K].QCANLQTAIADAEQR.[G]	1xCarbamidomethyl [C2]; 1xTMT6plex [N-Term]	1	1	16	W5Q6E8	W5Q6E8 [336-350]	0	1917.96	15	2.1677e+06	2.0058e+06	2.47125e+06	2.3487e+06	2.50778e+06	2.36914e+06		3	639.995	1.94e-05	4.14
[K].QCANLQNAIADAEQR.[G]	1xCarbamidomethyl [C2]; 1xDeamidated [N/Q]; 1xTMT6plex [N-Term]	1	1	47	W5Q687	W5Q687 [385-399]	0	1931.94	15	8.90106e+06	8.24649e+06	9.65778e+06	1.0309e+07	1.18008e+07	1.12205e+07		2	966.479	1.856e-08	3.69
[K].QCANLQNAIADAEQR.[G]	1xCarbamidomethyl [C2]; 1xTMT6plex [N-Term]	1	1	31	W5Q687	W5Q687 [385-399]	0	1930.96	15	2.46647e+07	2.48817e+07	2.65427e+07	3.94756e+07	4.8538e+07	4.15063e+07		2	965.977	7.39e-09	5.18
[K].QAWFIENEEQEYIK.[T]	1xTMT6plex [K14]; 1xTMT6plex [N-Term]	1	1	6	W5PSZ5	W5PSZ5 [10-23]	0	2285.19	14	1.16028e+07	1.06365e+07	1.28319e+07	1.47448e+07	1.59969e+07	1.47912e+07		2	1143.09	1.118e-08	5.66
[R].ELTQQMQDIQAEIDAHNDIFK.[S]	1xTMT6plex [K21]; 1xTMT6plex [N-Term]	1	1	1	W5NUY7	W5NUY7 [2492-2512]	0	2945.51	21	623229	591040	685620	700323	724984	725111		3	982.501	1.67e-09	5.63
[K].ELTSMEAQLHDAQELLQEETR.[A]	1xTMT6plex [N-Term]	1	1	1	W5PWH2	W5PWH2 [1290-1310]	0	2700.33	21	31771.4	39240	32488	36473.8	35836.2	41203.5		3	900.785	4.75e-08	3.49
[K].QAVSMFLGAVEEAKK.[E]	2xTMT6plex [K14; K15]; 1xTMT6plex [N-Term]	1	1	1	W5QAE8	W5QAE8 [376-390]	1	2295.33	15	1.95432e+06	1.94876e+06	2.3967e+06	1.68585e+06	1.96431e+06	1.87158e+06		3	765.779	5.878e-09	5.29
[K].ELTTEINSNLEQVSSHK.[S]	1xTMT6plex [K17]; 1xTMT6plex [N-Term]	1	1	7	W5Q160	W5Q160 [329-345]	0	2387.28	17	1.16153e+07	1.17603e+07	1.31089e+07	1.31948e+07	1.57188e+07	1.49329e+07		3	796.427	1.349e-07	3.85
[K].QAVSMFLGAVEEAK.[K]	1xTMT6plex [K14]; 1xTMT6plex [N-Term]	1	1	3	W5QAE8	W5QAE8 [376-389]	0	1938.08	14	5.53334e+06	5.38921e+06	5988529	6.19257e+06	7.47784e+06	6.74097e+06		2	969.537	4.475e-08	5.1
[R].QAVQILDELADK.[L]	1xTMT6plex [K12]; 1xTMT6plex [N-Term]	1	1	4	W5PJJ0	W5PJJ0 [228-239]	0	1801.05	12	1.99705e+06	1.90382e+06	2.18466e+06	2.18177e+06	2.56591e+06	2.24112e+06		2	901.025	4.675e-06	3.72
[R].QCCESNLEPLFNGYIETLR.[R]	2xCarbamidomethyl [C2; C3]; 1xDeamidated [N]; 1xTMT6plex [N-Term]	1	1	3	W5Q6A0	W5Q6A0 [163-181]	0	2573.22	19	1.06333e+06	1.00924e+06	1.29133e+06	1.17862e+06	1.22861e+06	1.24091e+06		3	858.406	2.949e-05	4.61
[R].QCCESNLEPLFSGYIETLR.[R]	2xCarbamidomethyl [C2; C3]; 1xTMT6plex [N-Term]	2	4	11	E3VW87; Q28582	E3VW87 [145-163]; Q28582 [145-163]	0	2545.23	19	2.08676e+07	1.67087e+07	1.91389e+07	2.30219e+07	2.32603e+07	2.04605e+07	Shared	2	1273.11	1.264e-09	5.53
[R].QCCESNLEPLFSGYIETLR.[R]	2xCarbamidomethyl [C2; C3]; 1xDeamidated [N/Q]; 1xTMT6plex [N-Term]	2	4	5	E3VW87; Q28582	E3VW87 [145-163]; Q28582 [145-163]	0	2546.21	19	3.84269e+06	3.66072e+06	3.80461e+06	4.86881e+06	5.22516e+06	4.82765e+06	Shared	2	1273.6	8.237e-07	3.22
[K].EITALAPSTMK.[I]	1xOxidation [M10]; 1xTMT6plex [K11]; 1xTMT6plex [N-Term]	4	13	20	D7RIF5; W5PZK7; W5NYJ1; Q28539	D7RIF5 [316-326]; W5PZK7 [318-328]; W5NYJ1 [318-328]; Q28539 [15-25]	0	1635.94	11	5.86075e+07	5.77581e+07	8.72159e+07	5.86724e+07	7.12742e+07	6.41084e+07	Shared	2	818.466	7.524e-05	3.11
[K].QCVENADLPEGEK.[K]	1xCarbamidomethyl [C2]; 1xTMT6plex [K13]; 1xTMT6plex [N-Term]	1	1	8	W5QHM6	W5QHM6 [111-123]	0	1946.99	13	1.26741e+06	1.17635e+06	1.431e+06	1.48299e+06	1.57359e+06	1.47735e+06		2	973.998	5.162e-06	3.31
[K].ELSGLPSGPSAGSGPPPPPPGPPPPPVPTSSGSDDSASR.[S]	1xTMT6plex [N-Term]	1	2	4	W5QG16	W5QG16 [216-254]	0	3815.89	39	2.52442e+06	2.13395e+06	3.36786e+06	4.22828e+06	4.45717e+06	3.87737e+06		4	954.724	2.791e-07	4.48
[K].KHQALQAEIAGHEPR.[I]	1xTMT6plex [K1]; 1xTMT6plex [N-Term]	1	1	1	W5PJ75	W5PJ75 [825-839]	1	2143.21	15	288370	293849	305971	340812	354598	322523		3	715.072	6.047e-06	3.08
[K].ELSHEDLEPPPEHVPPPPRPPK.[R]	1xTMT6plex [K22]; 1xTMT6plex [N-Term]	1	1	2	W5PVB4	W5PVB4 [293-314]	0	2952.6	22	603173	534864	674584	636224	695283	638331		5	591.323	1.146e-05	4.99
[K].QCTSLQSAIADAEQR.[G]	1xCarbamidomethyl [C2]; 1xTMT6plex [N-Term]	1	1	3	W5Q6D3	W5Q6D3 [402-416]	0	1906.95	15	1.4331e+06	1.25784e+06	1.45702e+06	1.22771e+06	1.2374e+06	1.19955e+06		2	953.984	9.969e-05	2.44
[K].QCTFLNIVAER.[E]	1xCarbamidomethyl [C2]; 1xTMT6plex [N-Term]	1	1	2	W5PHM2	W5PHM2 [78-88]	0	1579.85	11	8.26525e+06	9.86271e+06	8.43827e+06	3.8385e+06	4.26028e+06	4.10463e+06		2	790.422	1.75e-05	4.06
[K].QCSNLEMAIADAEQQGDCALK.[D]	2xCarbamidomethyl [C2; C18]; 1xOxidation [M7]; 1xTMT6plex [K21]; 1xTMT6plex [N-Term]	1	1	4	W5Q643	W5Q643 [366-386]	0	2826.35	21	577510	513890	764588	864795	995300	942040		3	942.79	2.665e-07	4.11
[K].EISPDTTLLDLQNNDISELR.[K]	1xTMT6plex [N-Term]	1	2	3	O46390	O46390 [88-107]	0	2515.31	20	496946	406307	557144	619625	684698	660146		2	1258.16	4.089e-07	3.46
[K].EISPDTTLLDLQNNDISELR.[K]	1xDeamidated [N]; 1xTMT6plex [N-Term]	1	2	5	O46390	O46390 [88-107]	0	2516.29	20	280234	242229	332944	376331	421237	368361		3	839.435	6.996e-05	3.83
[K].EISPDTTLLDLQNNDISELRK.[D]	1xTMT6plex [K21]; 1xTMT6plex [N-Term]	1	2	1	O46390	O46390 [88-108]	1	2872.57	21	2.00084e+06	2.08213e+06	1.83212e+06	2.38184e+06	2.52028e+06	2693025		4	718.893	5.156e-06	6.3
[K].QCSNLEMAIADAEQQGDCALK.[D]	2xCarbamidomethyl [C2; C18]; 1xDeamidated [Q14]; 1xTMT6plex [K21]; 1xTMT6plex [N-Term]	1	1	1	W5Q643	W5Q643 [366-386]	0	2811.34	21	89925	54538.4	95647.9	180216	212665	169212		3	937.789	2.574e-05	3.91
[R].QDALQDLNTLAK.[N]	1xTMT6plex [K12]; 1xTMT6plex [N-Term]	1	1	1	W5PC91	W5PC91 [1651-1662]	0	1788.03	12	1.46261e+06	1.2242e+06	1.55599e+06	1754804	2.04384e+06	1.86033e+06		2	894.515	6.311e-05	2.09
[K].QCSNLEMAIADAEQQGDCALK.[D]	2xCarbamidomethyl [C2; C18]; 1xTMT6plex [K21]; 1xTMT6plex [N-Term]	1	1	1	W5Q643	W5Q643 [366-386]	0	2810.35	21	122477	116008	132988	204639	237748	198456		3	937.454	1.049e-08	4.91
[R].ELSQATIDSK.[T]	1xTMT6plex [K10]; 1xTMT6plex [N-Term]	1	1	1	W5PYQ1	W5PYQ1 [355-364]	0	1549.88	10	679837	630347	791076	647675	812317	699458		2	775.44	3.284e-05	3.16
[K].EISQDSLAAR.[D]	1xTMT6plex [N-Term]	1	1	5	W5Q4W6	W5Q4W6 [198-207]	0	1318.72	10	2.96172e+06	2.8143e+06	3.30953e+06	2.85329e+06	3.2706e+06	2.90132e+06		2	659.86	8.564e-05	3.08
[K].QCQQLQTAITDAEQR.[G]	1xCarbamidomethyl [C2]; 1xTMT6plex [N-Term]	1	1	8	W5Q5S8	W5Q5S8 [365-379]	0	2019.01	15	1.12631e+06	1.18783e+06	1.39557e+06	1.52957e+06	1.66475e+06	1.44181e+06		2	1010	1.622e-07	3.28
[K].QCFYEDITQGTK.[C]	1xCarbamidomethyl [C2]; 1xTMT6plex [K12]; 1xTMT6plex [N-Term]	1	1	1	W5Q4H1	W5Q4H1 [48-59]	0	1947.99	12	939524	881453	1.03893e+06	799609	986962	801319		2	974.496	1.066e-05	3.19
[K].ELSQIEACQGPMQTR.[L]	1xCarbamidomethyl [C8]; 1xTMT6plex [N-Term]	1	1	2	W5QCQ1	W5QCQ1 [579-593]	0	1976.97	15	459411	395043	477949	414980	461018	474838		2	988.989	1.487e-05	2.61
[K].QCEDLASFTENMVVFGCPN.[-]	2xCarbamidomethyl [C2; C17]; 1xTMT6plex [N-Term]	1	1	2	W5P5T4	W5P5T4 [883-901]	0	2447.09	19	278919	243821	383219	402235	428691	354728		3	816.363	8.851e-05	3.6
[K].QCDWFQADQPAK.[N]	1xCarbamidomethyl [C2]; 1xTMT6plex [K12]; 1xTMT6plex [N-Term]	1	1	2	W5QCP9	W5QCP9 [2814-2825]	0	1951.97	12	3.51609e+06	3452340	3546734	3.47162e+06	3.99971e+06	3.62866e+06		2	976.484	0.0001027	3.63
[K].ELSYESLEDLNDK.[Y]	1xTMT6plex [K13]; 1xTMT6plex [N-Term]	1	1	2	W5P6F4	W5P6F4 [309-321]	0	2013.04	13	376076	280948	399373	557937	564561	456685		2	1007.02	1.549e-07	2.78
[K].QCCGTDGVEANYIK.[T]	2xCarbamidomethyl [C2; C3]; 1xTMT6plex [K14]; 1xTMT6plex [N-Term]	1	1	1	W5Q1B2	W5Q1B2 [794-807]	0	2073.01	14	556541	531605	555935	508940	582698	530017		2	1037.01	1.272e-07	3.5
[R].QCCESNLEPLFSGYIETLRR.[E]	2xCarbamidomethyl [C2; C3]; 1xTMT6plex [N-Term]	2	4	1	E3VW87; Q28582	E3VW87 [145-164]; Q28582 [145-164]	1	2701.33	20	1.54052e+06	1.37109e+06	1784545	2.09364e+06	1.99431e+06	2.13462e+06	Shared	3	901.106	1.382e-05	4.01
[K].EITALAPSTMK.[I]	1xTMT6plex [K11]; 1xTMT6plex [N-Term]	4	13	37	D7RIF5; W5PZK7; W5NYJ1; Q28539	D7RIF5 [316-326]; W5PZK7 [318-328]; W5NYJ1 [318-328]; Q28539 [15-25]	0	1619.94	11	3.31846e+08	3.22125e+08	3.39039e+08	3.29081e+08	4.06617e+08	3.60342e+08	Shared	2	810.471	4.149e-05	2.88
[R].QCSDSSAMEALAR.[H]	1xCarbamidomethyl [C2]; 1xTMT6plex [N-Term]	1	1	3	W5PNV5	W5PNV5 [326-338]	0	1654.77	13	2.42707e+06	2.17589e+06	2.58867e+06	2.98682e+06	3613262	3.18682e+06		2	827.888	5.473e-05	2.41
[R].QDVDNASLAR.[L]	1xDeamidated [N5]; 1xTMT6plex [N-Term]	2	3	8	K4P1S1; A4ZYA6	K4P1S1 [130-139]; A4ZYA6 [208-217]	0	1318.68	10	6.31134e+06	5.92593e+06	6.3731e+06	6.80675e+06	8.29006e+06	7.77578e+06	Shared	2	659.843	4.774e-06	3.2
[K].ELQEMDKDDESLIK.[Y]	2xTMT6plex [K7; K14]; 1xTMT6plex [N-Term]	1	1	3	W5QHP6	W5QHP6 [33-46]	1	2380.29	14	2.53134e+06	2.27348e+06	2.69205e+06	4.0463e+06	4.63506e+06	4.61576e+06		3	794.095	4.576e-06	3.93
[R].ELQELVQYPVEHPDK.[F]	1xTMT6plex [K15]; 1xTMT6plex [N-Term]	1	1	12	W5PRJ4	W5PRJ4 [488-502]	0	2282.24	15	1.34873e+07	1.25364e+07	1.44822e+07	1.81436e+07	1.61066e+07	1.33842e+07		2	1141.62	7.903e-07	4.25
[K].ELNEMQAQLVEECTHK.[N]	1xCarbamidomethyl [C13]; 1xDeamidated [Q8]; 1xTMT6plex [K16]; 1xTMT6plex [N-Term]	1	2	2	W5PGB5	W5PGB5 [1058-1073]	0	2418.2	16	584947	531484	699735	581401	635987	638136		3	806.741	7.224e-07	3.68
[R].ELNFSSAEQMEK.[F]	1xTMT6plex [K12]; 1xTMT6plex [N-Term]	1	1	2	W5QHS3	W5QHS3 [59-70]	0	1870.96	12	1.5081e+06	1.48581e+06	1.70826e+06	1.71253e+06	1.96204e+06	1.84876e+06		2	935.98	7.729e-07	3.69
[K].IEDEQALGMQLQK.[K]	1xOxidation [M9]; 1xTMT6plex [K13]; 1xTMT6plex [N-Term]	2	2	4	W5PPG6; W5PIU1	W5PPG6 [1098-1110]; W5PIU1 [1102-1114]	0	1977.07	13	802210	695251	2.34128e+06	913232	902534	879523	Shared	3	659.696	5.004e-05	3.46
[R].EINGISVANQTVEQLQK.[M]	1xDeamidated [N3]; 1xTMT6plex [K17]; 1xTMT6plex [N-Term]	1	2	2	W5NXK9	W5NXK9 [465-481]	0	2330.3	17	2.28401e+06	1.78489e+06	2.25441e+06	2.21545e+06	2.31641e+06	2.07948e+06		3	777.437	3.327e-05	4.43
[K].ELNGTASEEK.[K]	1xDeamidated [N3]; 1xTMT6plex [K10]; 1xTMT6plex [N-Term]	1	1	6	W5PYQ1	W5PYQ1 [600-609]	0	1536.82	10	1.61698e+06	1.45145e+06	1.73566e+06	1.83608e+06	2.26959e+06	1.92453e+06		2	768.908	1.995e-05	2.81
[K].ELNIQVDDSYAR.[K]	1xTMT6plex [N-Term]	1	1	1	W5NRL0	W5NRL0 [196-207]	0	1651.85	12	442350	364241	509496	537475	493362	503046		2	826.428	6.271e-05	4.22
[R].ELNMDSVVAEIK.[A]	1xTMT6plex [K12]; 1xTMT6plex [N-Term]	1	1	8	W5Q6A0	W5Q6A0 [286-297]	0	1806.01	12	6.99961e+06	6.92238e+06	8.21424e+06	7.23624e+06	7.93535e+06	6.94399e+06		2	903.504	1.349e-06	4.59
[R].KLAGLEEALQK.[A]	2xTMT6plex [K1; K11]; 1xTMT6plex [N-Term]	1	3	29	Q28582	Q28582 [368-378]	1	1887.19	11	3.21462e+08	2.58169e+08	3.33938e+08	3.42491e+08	4.04015e+08	3.60321e+08		3	629.731	1.123e-07	5.24
[R].QEPSDSPMFIINR.[Y]	1xTMT6plex [N-Term]	1	1	13	W5P9B0	W5P9B0 [201-213]	0	1762.9	13	1.41958e+07	1.41613e+07	1.56022e+07	1.92497e+07	2.34486e+07	2.0321e+07		2	881.949	6.715e-06	3.15
[R].ELNQIEAELNK.[H]	1xTMT6plex [K11]; 1xTMT6plex [N-Term]	1	1	3	W5PGT1	W5PGT1 [28-38]	0	1759	11	1.61443e+06	1.49394e+06	1.76994e+06	1.73094e+06	1.85954e+06	1.84855e+06		2	880.001	4.877e-05	2.34
[K].ELNQVMEQLGDAR.[I]	1xTMT6plex [N-Term]	1	1	2	W5PFJ5	W5PFJ5 [476-488]	0	1731.89	13	455403	399039	466042	511277	587692	507916		2	866.452	6.625e-05	2.86
[K].EINSDQSAQGNISSDR.[G]	1xTMT6plex [N-Term]	1	1	4	W5PRM6	W5PRM6 [1220-1235]	0	1949.94	16	643423	613384	765006	653305	698982	606328		2	975.477	5.501e-06	2.78
[K].QEPGENSEILATLK.[Y]	1xTMT6plex [K14]; 1xTMT6plex [N-Term]	1	1	6	W5PDJ6	W5PDJ6 [33-46]	0	1987.11	14	2.05852e+06	1.90529e+06	2.23754e+06	3.00632e+06	3.39192e+06	2.89548e+06		2	994.061	1.489e-06	2.96
[K].QEPERNECFLNHKDDSPDLPK.[L]	1xCarbamidomethyl [C8]; 2xDeamidated [N11; N/Q]; 2xTMT6plex [K13; K21]; 1xTMT6plex [N-Term]	2	2	12	W5PWE9; P14639	W5PWE9 [118-138]; P14639 [118-138]	2	3257.64	21	1.17718e+07	7.56351e+06	1.20729e+07	1.26344e+07	1.34386e+07	1.19079e+07	Shared	3	1086.55	1.106e-05	3.48
[K].QEPERNECFLNHKDDSPDLPK.[L]	1xCarbamidomethyl [C8]; 1xDeamidated [N]; 2xTMT6plex [K13; K21]; 1xTMT6plex [N-Term]	2	2	33	W5PWE9; P14639	W5PWE9 [118-138]; P14639 [118-138]	2	3256.65	21	1.0879e+08	7.00828e+07	1.10682e+08	1.10051e+08	1.22703e+08	1.00993e+08	Shared	3	1086.22	7.922e-09	3.92
[K].QEPERNECFLNHKDDSPDLPK.[L]	1xCarbamidomethyl [C8]; 2xTMT6plex [K13; K21]; 1xTMT6plex [N-Term]	2	2	30	W5PWE9; P14639	W5PWE9 [118-138]; P14639 [118-138]	2	3255.67	21	1.38701e+08	8.28985e+07	1.46429e+08	1.08255e+08	1.22569e+08	9.8057e+07	Shared	3	1085.89	8.683e-08	4.3
[R].ELPAAAAPAGPASLAR.[W]	1xTMT6plex [N-Term]	1	1	2	W5Q4B6	W5Q4B6 [57-72]	0	1691.96	16	2.88033e+06	2.82351e+06	3.06709e+06	3.45105e+06	3.70928e+06	3.26796e+06		3	564.657	7.145e-05	3.58
[K].QEPERNECFLNHK.[D]	1xCarbamidomethyl [C8]; 1xDeamidated [N/Q]; 1xTMT6plex [K13]; 1xTMT6plex [N-Term]	2	2	37	W5PWE9; P14639	W5PWE9 [118-130]; P14639 [118-130]	1	2160.09	13	4.11191e+07	3.27063e+07	4.32017e+07	4.50148e+07	5.34323e+07	4.43724e+07	Shared	3	720.704	2.856e-05	3.37
[K].QEPERNECFLNHK.[D]	1xCarbamidomethyl [C8]; 1xTMT6plex [K13]; 1xTMT6plex [N-Term]	2	2	12	W5PWE9; P14639	W5PWE9 [118-130]; P14639 [118-130]	1	2159.11	13	4.21537e+07	3.03375e+07	4.22618e+07	4.31974e+07	5.35368e+07	3.95367e+07	Shared	3	720.371	6.051e-08	4.8
[K].QENTQTEQK.[L]	1xTMT6plex [K9]; 1xTMT6plex [N-Term]	1	2	5	W5PVU0	W5PVU0 [214-222]	0	1563.84	9	1.0034e+06	1.00917e+06	1.14479e+06	1.28513e+06	1.49291e+06	1.34982e+06		2	782.421	4.841e-05	2.27
[K].QEMQSAGSQR.[G]	1xTMT6plex [N-Term]	1	1	1	W5Q7M7	W5Q7M7 [205-214]	0	1350.66	10	442981	338576	484791	465808	605839	564617		2	675.835	0.0001277	3.17
[R].ELPAWVSFPDVEK.[A]	1xTMT6plex [K13]; 1xTMT6plex [N-Term]	1	1	4	W5PKK8	W5PKK8 [129-141]	0	1975.09	13	8.37652e+06	6.61003e+06	1.0236e+07	9.65906e+06	1.01448e+07	8.95046e+06		2	988.044	1.497e-05	3.58
[R].ELPCGQTQTVQAHYVLK.[G]	1xCarbamidomethyl [C4]; 1xDeamidated [Q11]; 1xTMT6plex [K17]; 1xTMT6plex [N-Term]	1	1	1	W5NSA6	W5NSA6 [467-483]	0	2431.31	17	1.2386e+06	945753	1.18165e+06	1.23239e+06	1.35865e+06	1.04455e+06		3	811.106	2.974e-06	5.11
[K].ELNEMQAQLVEECTHK.[N]	1xCarbamidomethyl [C13]; 1xTMT6plex [K16]; 1xTMT6plex [N-Term]	1	2	2	W5PGB5	W5PGB5 [1058-1073]	0	2417.22	16	810736	629976	910742	946399	1.03742e+06	1.11711e+06		3	806.41	1.281e-06	4.4
[K].QEQIINTMTQDLR.[G]	1xTMT6plex [N-Term]	1	1	3	W5P9L8	W5P9L8 [754-766]	0	1818.96	13	2.72329e+06	2.45894e+06	2.87755e+06	2.65705e+06	2.86082e+06	2565367		2	909.983	2.765e-05	3.23
[K].QESDQLVLNQHPASDK.[I]	1xTMT6plex [K16]; 1xTMT6plex [N-Term]	1	1	1	W5Q7Z7	W5Q7Z7 [277-292]	0	2267.2	16	258822	265702	292161	247054	276940	246045		3	756.402	3.218e-06	4.02
[K].QESTLGGGTNR.[H]	1xTMT6plex [N-Term]	1	1	8	W5Q5Q6	W5Q5Q6 [970-980]	0	1348.7	11	2.21998e+07	2.0152e+07	15900149	1.10465e+07	1.00511e+07	8.9375e+06		2	674.854	4.13e-05	3.87
[R].ELLSQLEETQNLYR.[S]	1xTMT6plex [N-Term]	1	1	1	W5QFP3	W5QFP3 [2297-2310]	0	1965.05	14	998871	609871	914345	634608	644299	586696		2	983.024	4.984e-06	3.22
[R].QEVQDLQASLKEEK.[W]	2xTMT6plex [K11; K14]; 1xTMT6plex [N-Term]	1	2	2	W5Q2P6	W5Q2P6 [92-105]	1	2332.33	14	2.60128e+06	2.38843e+06	3.01117e+06	2.56775e+06	3.07212e+06	2.59327e+06		3	778.11	1.217e-07	3.11
[K].KLAPEYEAAATR.[L]	1xTMT6plex [K1]; 1xTMT6plex [N-Term]	1	2	7	C6JUQ0	C6JUQ0 [62-73]	1	1778.02	12	1.2484e+07	1.12156e+07	1.41229e+07	1.15127e+07	13285890	1.24254e+07		3	593.343	3.81e-06	4.26
[R].QEVEEWVASGNK.[R]	1xTMT6plex [K12]; 1xTMT6plex [N-Term]	1	1	2	W5PS05	W5PS05 [55-66]	0	1833.97	12	2.3278e+06	2035815	2.5676e+06	2.25464e+06	2.44737e+06	2086573		2	917.488	0.0001005	2.54
[R].ELLTLDEKDPR.[R]	1xTMT6plex [K8]; 1xTMT6plex [N-Term]	1	2	6	W5NXM4	W5NXM4 [59-69]	1	1787.03	11	1.10592e+07	1.04955e+07	1.09897e+07	1.15098e+07	1.27566e+07	1.17036e+07		2	894.014	0.0001312	3.18
[R].EILTLLQGVHQGAGFQDIPK.[R]	1xTMT6plex [K20]; 1xTMT6plex [N-Term]	1	1	4	W5PV21	W5PV21 [37-56]	0	2622.5	20	5.57032e+06	4.93902e+06	6.38962e+06	6.49557e+06	7.56997e+06	6.65397e+06		3	874.833	7.14e-08	6.65
[K].ELLTQPGDWTLFVPTNDAFK.[G]	1xTMT6plex [K20]; 1xTMT6plex [N-Term]	2	2	5	W5PK02; W5PK03	W5PK02 [523-542]; W5PK03 [523-542]	0	2750.48	20	1.04483e+07	1.1265e+07	1.10825e+07	2.6002e+07	2.99173e+07	2.68825e+07	Shared	2	1375.73	1.519e-08	6.17
[K].ELLTQPGDWTLFVPTNDAFK.[G]	1xDeamidated [N16]; 1xTMT6plex [K20]; 1xTMT6plex [N-Term]	2	2	1	W5PK02; W5PK03	W5PK02 [523-542]; W5PK03 [523-542]	0	2751.46	20	582401	614522	629206	1.22837e+06	1.24917e+06	1.17929e+06	Shared	3	917.819	2.599e-05	4.25
[K].ELLTQPGDWTLFVPTNDAFK.[G]	2xDeamidated [Q5; N16]; 1xTMT6plex [K20]; 1xTMT6plex [N-Term]	2	2	1	W5PK02; W5PK03	W5PK02 [523-542]; W5PK03 [523-542]	0	2752.45	20	537118	582244	568846	1.23229e+06	1.44117e+06	1.41755e+06	Shared	2	1376.74	3.582e-05	3.45
[K].ELLTSFGPLK.[A]	1xTMT6plex [K10]; 1xTMT6plex [N-Term]	1	1	5	W5NSJ7	W5NSJ7 [277-286]	0	1562.96	10	9.64882e+06	9.62489e+06	1.1412e+07	1.01098e+07	1.20326e+07	1.0493e+07		2	781.975	6.617e-05	3.21
[R].ELLTTMGDR.[F]	1xTMT6plex [N-Term]	2	4	9	W5PKY9; W5Q2S8	W5PKY9 [125-133]; W5Q2S8 [265-273]	0	1264.68	9	5.7813e+07	6.54578e+07	55489995	4.4321e+07	5.67681e+07	43567615	Shared	2	632.84	0.0001314	3.23
[R].QEMQEVQSSR.[S]	1xTMT6plex [N-Term]	1	2	12	W5PK95	W5PK95 [191-200]	0	1450.72	10	1.73435e+07	1.80256e+07	1.88059e+07	1.78686e+07	2.121e+07	1.96948e+07		2	725.863	7.835e-05	2.93
[K].QEVEELWIGLNDLK.[L]	1xTMT6plex [K14]; 1xTMT6plex [N-Term]	1	1	1	W5PS52	W5PS52 [406-419]	0	2144.2	14	1.16979e+06	1.07732e+06	1.37098e+06	1.09772e+06	1.0731e+06	1.0222e+06		2	1072.59	2.577e-07	3.84
[K].EILVGDVGQTVDDPYATFVK.[M]	1xDeamidated [Q9]; 1xTMT6plex [K20]; 1xTMT6plex [N-Term]	1	2	2	W5Q9P7	W5Q9P7 [53-72]	0	2625.41	20	332998	347947	429343	503700	491428	461236		3	875.804	2.07e-05	4.75
[K].EILVGDVGVTITDPFK.[H]	1xTMT6plex [K16]; 1xTMT6plex [N-Term]	1	1	3	W5Q831	W5Q831 [68-83]	0	2161.25	16	4.75471e+06	4.62915e+06	4.72052e+06	5.12019e+06	5.84852e+06	5.12731e+06		2	1081.12	7.399e-09	4.92
[R].ELLVSYEEEQFK.[V]	1xTMT6plex [K12]; 1xTMT6plex [N-Term]	1	1	1	W5P4H7	W5P4H7 [307-318]	0	1972.07	12	257030	252748	306634	279896	309077	279330		2	986.535	2.227e-05	2.97
[K].QETFDAGLQAFQQEGIANITALK.[D]	1xDeamidated [Q13]; 1xTMT6plex [K23]; 1xTMT6plex [N-Term]	1	1	2	W5PJ75	W5PJ75 [2023-2045]	0	2952.57	23	2.57453e+06	2.50196e+06	2.52738e+06	3.009e+06	3.60992e+06	2.63343e+06		3	984.858	2.704e-07	6.14
[K].QETFDAGLQAFQQEGIANITALK.[D]	1xTMT6plex [K23]; 1xTMT6plex [N-Term]	1	1	3	W5PJ75	W5PJ75 [2023-2045]	0	2951.59	23	1.3191e+06	1.2132e+06	1.36411e+06	1.5262e+06	1.82497e+06	1.49163e+06		4	738.649	3.316e-06	4.41
[K].EIMAEIYK.[N]	1xTMT6plex [K8]; 1xTMT6plex [N-Term]	1	1	10	P83205	P83205 [238-245]	0	1454.83	8	7.51531e+07	7.26855e+07	8.00627e+07	7.26157e+07	7.70033e+07	6.64319e+07		2	727.921	9.562e-05	2.8
[K].QETEVELYNEFPEPIKLDK.[N]	2xTMT6plex [K16; K19]; 1xTMT6plex [N-Term]	1	1	2	B2LYK6	B2LYK6 [176-194]	1	3008.64	19	1.19316e+06	1.17905e+06	1.42952e+06	1.30232e+06	1.39235e+06	1.14719e+06		3	1003.55	1.192e-06	4.37
[K].QETEVELYNEFPEPIK.[L]	1xDeamidated [N9]; 1xTMT6plex [K16]; 1xTMT6plex [N-Term]	1	1	2	B2LYK6	B2LYK6 [176-191]	0	2424.26	16	969671	1.07317e+06	1.31512e+06	790115	984795	875993		3	808.761	4.341e-05	3.23
[K].ELMLNNLQENLSEVSR.[V]	1xTMT6plex [N-Term]	1	1	3	W5PNE4	W5PNE4 [829-844]	0	2118.11	16	1.73032e+06	1.4798e+06	1.92712e+06	2.01336e+06	2.34561e+06	1924626		2	1059.55	2.929e-07	4.57
[K].QETELSPEMISSGSWR.[D]	1xTMT6plex [N-Term]	1	1	5	W5PJU6	W5PJU6 [222-237]	0	2066.01	16	1.85188e+06	1.77462e+06	1.97175e+06	2.05924e+06	2.32595e+06	2.13495e+06		2	1033.5	7.88e-07	3.87
[K].ELMQNEIQER.[H]	1xTMT6plex [N-Term]	1	2	7	W5QJ27	W5QJ27 [3567-3576]	0	1518.78	10	2.47527e+06	1.71657e+06	2.50377e+06	2.06818e+06	2.45458e+06	3.36028e+06		2	759.89	5.677e-05	2.91
[K].EILVGDVGQTVDDPYATFVK.[M]	1xTMT6plex [K20]; 1xTMT6plex [N-Term]	1	2	7	W5Q9P7	W5Q9P7 [53-72]	0	2624.42	20	8.20104e+06	8.03488e+06	9.54499e+06	1.06328e+07	1.13314e+07	1.00118e+07		2	1312.71	6.309e-10	4.72
[K].ELPDPQESIQR.[A]	1xTMT6plex [N-Term]	1	1	39	W5PF65	W5PF65 [156-166]	0	1540.82	11	1.12651e+08	7.09848e+07	1.2071e+08	6.4288e+07	7.04555e+07	5.47592e+07		2	770.911	1.411e-05	2.57
[K].QELSTVNMMDEFAR.[Y]	1xTMT6plex [N-Term]	1	1	2	W5PIY4	W5PIY4 [83-96]	0	1899.91	14	1.53408e+06	1.49277e+06	1.53187e+06	2.00127e+06	2.39493e+06	2.22693e+06		2	950.461	3.083e-06	2.52
[K].QEINTLLEAK.[R]	1xTMT6plex [K10]; 1xTMT6plex [N-Term]	1	2	1	W5PGB5	W5PGB5 [809-818]	0	1616.96	10	958774	875878	999127	1062416	1.19494e+06	1.16187e+06		2	808.981	0.0001034	2.17
[R].EIPSSSPVSPQETPK.[Q]	1xTMT6plex [K15]; 1xTMT6plex [N-Term]	1	1	1	W5P7U3	W5P7U3 [82-96]	0	2041.12	15	364803	398970	338843	256191	260705	191417		2	1021.06	0.0001105	1.89
[R].KIAEQELLDASER.[VL]	1xTMT6plex [K1]; 1xTMT6plex [N-Term]	4	4	4	W5PPG6; W5PWV8; W5PT09; W5PBN5	W5PPG6 [1702-1714]; W5PWV8 [1695-1707]; W5PT09 [1697-1709]; W5PBN5 [1699-1711]	1	1960.11	13	1.18245e+07	5.06341e+06	1.33422e+07	3.26425e+06	3.52361e+06	3.40297e+06	Shared	3	654.039	5.176e-07	4.63
[K].ELPSTLLELHLDYNK.[I]	1xTMT6plex [K15]; 1xTMT6plex [N-Term]	1	1	3	W5PEI2	W5PEI2 [228-242]	0	2243.27	15	4.91966e+06	4.71081e+06	4.32614e+06	4.00215e+06	4.31834e+06	3.94193e+06		2	1122.13	4.694e-07	4.24
[R].QEELESTDVGVQGGAFEGTHMGPFVER.[G]	1xDeamidated [Q12]; 1xTMT6plex [N-Term]	1	1	2	W5PP28	W5PP28 [399-425]	0	3136.47	27	193790	147082	191504	217094	206688	206890		3	1046.17	3.265e-05	2.26
[R].QEELESTDVGVQGGAFEGTHMGPFVER.[G]	1xTMT6plex [N-Term]	1	1	3	W5PP28	W5PP28 [399-425]	0	3135.49	27	624410	563353	647942	748360	874091	768337		3	1045.83	1.923e-06	3.65
[R].IEDGISSPLPSK.[E]	1xTMT6plex [K12]; 1xTMT6plex [N-Term]	1	1	1	W5PCM4	W5PCM4 [243-254]	0	1700.98	12	3.17501e+06	2.59509e+06	3.50932e+06	3203944	3.77799e+06	2.93835e+06		2	850.995	9.751e-05	2.96
[R].ELQAAQAQLSEWR.[R]	1xTMT6plex [N-Term]	1	1	7	W5PWH2	W5PWH2 [1347-1359]	0	1758.93	13	8.19162e+06	8.20976e+06	9.22356e+06	9.32017e+06	1.24091e+07	1.03524e+07		2	879.965	8.175e-05	3.37
[R].QEEDGLEFLDHLGPK.[F]	1xTMT6plex [K15]; 1xTMT6plex [N-Term]	1	2	1	W5PA28	W5PA28 [873-887]	0	2185.15	15	155056	137175	155078	160644	216899	158053		3	729.056	6.626e-06	3.41
[K].ELQAHGADELLK.[R]	1xTMT6plex [K12]; 1xTMT6plex [N-Term]	1	1	10	W5QDZ3	W5QDZ3 [141-152]	0	1782.02	12	1.20717e+07	1.21427e+07	1.29573e+07	1.57669e+07	1.84428e+07	1.67376e+07		2	891.512	8.518e-07	4.07
[K].QEEASAGPVAPK.[A]	1xTMT6plex [K12]; 1xTMT6plex [N-Term]	1	1	5	W5PK38	W5PK38 [244-255]	0	1641.92	12	2.84849e+06	2.88392e+06	3.34292e+06	3.49812e+06	4.184e+06	3.77759e+06		2	821.456	6.482e-06	3.21
[R].QEEALAEFLQR.[K]	1xTMT6plex [N-Term]	1	1	2	W5QGF4	W5QGF4 [454-464]	0	1562.84	11	927256	904875	1.02115e+06	1.06992e+06	1.23823e+06	1.19431e+06		2	781.92	2.165e-05	2.5
[K].IEDEQAVEIQLQK.[K]	1xTMT6plex [K13]; 1xTMT6plex [N-Term]	1	1	6	W5PBN5	W5PBN5 [1101-1113]	0	2001.13	13	3.11849e+06	1.01233e+06	859491	806420	883787	828702		2	1001.07	1.166e-06	3.62
[R].QEDVIATANLSR.[KR]	1xTMT6plex [N-Term]	2	2	3	W5QI12; W5PQK6	W5QI12 [2199-2210]; W5PQK6 [2189-2200]	0	1545.84	12	3.6646e+06	3.27519e+06	3.96429e+06	3.16887e+06	3.69648e+06	3.34005e+06	Shared	2	773.424	5.406e-06	3.97
[R].ELQAQLQEQQVQVEMDMSKPDLTAALR.[D]	1xTMT6plex [K19]; 1xTMT6plex [N-Term]	1	1	2	W5QG29	W5QG29 [249-275]	0	3557.87	27	956666	1.03829e+06	1.10016e+06	998232	1.11775e+06	1.04566e+06		4	890.218	5.735e-07	5.51
[R].ELQAQLQEQQVQVEMDMSKPDLTAALR.[D]	1xDeamidated [Q10]; 1xTMT6plex [K19]; 1xTMT6plex [N-Term]	1	1	1	W5QG29	W5QG29 [249-275]	0	3558.85	27	904486	901152	1.00867e+06	839053	1000745	1.01165e+06		4	890.467	1.744e-05	5.24
[K].QEDGSLCLVQFPSR.[K]	1xCarbamidomethyl [C7]; 1xTMT6plex [N-Term]	1	1	4	W5Q3G3	W5Q3G3 [88-101]	0	1864.94	14	1.23484e+06	1.09692e+06	1.54284e+06	1.42226e+06	1.72079e+06	1.56281e+06		2	932.971	4.596e-05	2.86
[K].QECLNNIGDASSLIR.[A]	1xCarbamidomethyl [C3]; 1xTMT6plex [N-Term]	1	2	4	W5PQ43	W5PQ43 [229-243]	0	1918.99	15	1.94856e+06	1.75424e+06	2.23445e+06	1.97177e+06	2.28525e+06	2.04597e+06		2	959.992	1.065e-05	2.87
[R].QEATLVVGGDGR.[F]	1xTMT6plex [N-Term]	1	1	12	W5PJB6	W5PJB6 [86-97]	0	1430.78	12	8.7275e+06	7.97535e+06	1.2165e+07	1.03241e+07	1.14345e+07	9.80199e+06		2	715.891	3.024e-06	3.58
[KR].ELQDQLEAEQYFSTLYK.[T]	1xTMT6plex [K17]; 1xTMT6plex [N-Term]	2	3	2	W5Q2Y6; W5PGB5	W5Q2Y6 [826-842]; W5PGB5 [841-857]	0	2563.33	17	1.18915e+06	1.14155e+06	1.45128e+06	1.38707e+06	1.20304e+06	1.10855e+06	Shared	3	855.108	3.037e-06	5
[K].ELQDSTQMNEK.[E]	1xTMT6plex [K11]; 1xTMT6plex [N-Term]	1	1	1	W5Q6E0	W5Q6E0 [601-611]	0	1780.92	11	667083	604564	671906	714139	818743	758985		2	890.962	1.092e-05	3.7
[R].ELQDVDLAEVKPLVEK.[G]	2xTMT6plex [K11; K16]; 1xTMT6plex [N-Term]	1	1	9	W5P5W6	W5P5W6 [4-19]	0	2512.48	16	2.46091e+07	2.30053e+07	2.81169e+07	2.95095e+07	3.46863e+07	3.00629e+07		3	838.159	2.766e-08	4.88
[K].QEAGISEGQGTAGEEEEK.[K]	1xTMT6plex [K18]; 1xTMT6plex [N-Term]	1	1	4	W5PFB4	W5PFB4 [77-94]	0	2307.14	18	325651	320361	405719	384275	470828	439930		3	769.721	9.353e-05	2.36
[K].QEAATLAADNTQLQAR.[V]	1xTMT6plex [N-Term]	1	1	10	W5P0C1	W5P0C1 [419-434]	0	1930.02	16	8.1136e+06	7.70016e+06	8.40304e+06	9.16844e+06	1.05732e+07	9.74555e+06		2	965.512	4.696e-07	3.8
[K].ELQELNELFKPVVAAQK.[I]	2xTMT6plex [K10; K17]; 1xTMT6plex [N-Term]	1	1	1	W5Q562	W5Q562 [77-93]	0	2643.57	17	1.75179e+06	1.55431e+06	2.10131e+06	1.93706e+06	2.17623e+06	2132165		3	881.856	5.213e-09	5.13
[R].ELQAQIAELQEDFESEK.[A]	1xTMT6plex [K17]; 1xTMT6plex [N-Term]	1	1	1	W5NU63	W5NU63 [1115-1131]	0	2465.28	17	40317.8	47208.3	56515.6	38727.3	43329	52095.4		3	822.435	2.334e-05	3.05
[R].QAVLGAGLPISTPCTTINK.[V]	1xCarbamidomethyl [C14]; 1xTMT6plex [K19]; 1xTMT6plex [N-Term]	1	1	8	W5PN85	W5PN85 [104-122]	0	2399.37	19	1.52015e+07	1.50082e+07	1.75329e+07	1.72774e+07	2.06512e+07	1.84308e+07		2	1200.19	9.421e-09	4.57
[R].QEFAQHANAFHQWIQETR.[T]	1xTMT6plex [N-Term]	1	1	5	W5PJ75	W5PJ75 [2213-2230]	0	2470.22	18	1.72531e+07	1.67025e+07	1.9522e+07	2.02318e+07	2.52781e+07	2.31103e+07		3	824.075	3.906e-07	5.42
[K].ELPSFVGEKVDEEGLK.[K]	2xTMT6plex [K9; K16]; 1xTMT6plex [N-Term]	1	1	1	W5NRA2	W5NRA2 [42-57]	1	2463.39	16	1841346	1.54963e+06	2356208	1.80528e+06	2.40447e+06	2449126		3	821.803	3.272e-07	4.06
[R].QELILSNSEDK.[S]	1xDeamidated [N7]; 1xTMT6plex [K11]; 1xTMT6plex [N-Term]	1	1	3	W5PFV7	W5PFV7 [261-271]	0	1734.95	11	1.79995e+06	1.65565e+06	1.86427e+06	1.67306e+06	1.85994e+06	1.72749e+06		2	867.975	6.613e-05	2.65
[R].QELILSNSEDK.[S]	1xTMT6plex [K11]; 1xTMT6plex [N-Term]	1	1	1	W5PFV7	W5PFV7 [261-271]	0	1733.97	11	513003	453142	555720	493666	526408	529710		2	867.488	1.392e-05	3.36
[K].QEIENLNQDAK.[M]	1xTMT6plex [K11]; 1xTMT6plex [N-Term]	1	2	3	W5Q2P6	W5Q2P6 [816-826]	0	1759.96	11	1.04635e+06	938481	1.16501e+06	951085	1.17478e+06	1.04241e+06		2	880.482	2.277e-05	2.56
[K].QELELLNNELLK.[Q]	1xTMT6plex [K12]; 1xTMT6plex [N-Term]	1	1	3	W5PSI7	W5PSI7 [87-98]	0	1914.13	12	2.87129e+06	2.79569e+06	2.81053e+06	2.60144e+06	2.96867e+06	2.42224e+06		2	957.574	2.751e-06	3.99
[R].QELEETEVVTK.[S]	1xTMT6plex [K11]; 1xTMT6plex [N-Term]	1	2	18	W5PD77	W5PD77 [160-170]	0	1762.98	11	7.1329e+06	7.15056e+06	7.86495e+06	7.38059e+06	8.68308e+06	7.38382e+06		2	881.995	1.272e-07	3.25
[K].QELEAEYLAVFK.[K]	1xTMT6plex [K12]; 1xTMT6plex [N-Term]	1	1	1	W5Q9H8	W5Q9H8 [126-137]	0	1898.07	12	764556	697771	789242	720168	800284	742200		2	949.536	1.361e-05	3.13
[R].QELEAELAK.[V]	1xTMT6plex [K9]; 1xTMT6plex [N-Term]	1	1	4	W5Q2U7	W5Q2U7 [1635-1643]	0	1488.87	9	3.35054e+06	3.17254e+06	3.55189e+06	4.33427e+06	5.67942e+06	4.26459e+06		2	744.935	7.036e-05	2.59
[R].QELDTLSASFLEK.[Y]	1xTMT6plex [K13]; 1xTMT6plex [N-Term]	1	2	1	A8VIE7	A8VIE7 [64-76]	0	1939.08	13	380415	269781	432141	349311	491424	329532		3	647.027	0.0001106	3.53
[K].ELPINAQNYVR.[F]	1xTMT6plex [N-Term]	1	1	1	W5P6C1	W5P6C1 [422-432]	0	1545.86	11	1.67723e+06	1.47744e+06	1.91948e+06	1.73393e+06	1.92513e+06	1.60474e+06		2	773.428	3.162e-05	2.49
[R].QELAVFCSPEPPAK.[T]	1xCarbamidomethyl [C7]; 1xTMT6plex [K14]; 1xTMT6plex [N-Term]	1	1	2	W5PQK6	W5PQK6 [2146-2159]	0	2031.1	14	685905	658149	801812	746704	889995	807696		2	1016.05	3.256e-06	2.96
[R].ELPLTADALTFAEVSK.[D]	1xTMT6plex [K16]; 1xTMT6plex [N-Term]	1	1	5	W5PDF4	W5PDF4 [384-399]	0	2163.23	16	4.24239e+06	4.40348e+06	4.7264e+06	5.43932e+06	6.47435e+06	5.95642e+06		2	1082.11	1.584e-08	5.84
[R].QEFIDGILASK.[F]	1xTMT6plex [K11]; 1xTMT6plex [N-Term]	1	1	2	W5QFK2	W5QFK2 [6974-6984]	0	1678.98	11	3.35196e+06	3110438	3829725	4121005	4.83116e+06	4519916		2	839.991	6.135e-05	3.67
[R].QELAEAVASQR.[E]	1xTMT6plex [N-Term]	1	1	4	W5P0C1	W5P0C1 [787-797]	0	1430.78	11	2.78101e+06	2.53885e+06	3.19281e+06	3.00248e+06	3.81894e+06	3.24957e+06		2	715.894	0.0001026	3.24
[R].QELAALTLK.[Q]	1xTMT6plex [K9]; 1xTMT6plex [N-Term]	1	1	2	W5Q366	W5Q366 [510-518]	0	1444.91	9	3.6786e+06	3.87876e+06	3.92967e+06	3.85732e+06	4.47949e+06	3.8197e+06		2	722.954	0.0001053	2.36
[R].ELPPDQAEYCIAR.[M]	1xCarbamidomethyl [C10]; 1xTMT6plex [N-Term]	2	2	27	W5QJ62; W5P707	W5QJ62 [845-857]; W5P707 [836-848]	0	1790.89	13	7.11319e+06	6.91442e+06	7.15352e+06	6.82229e+06	7.71196e+06	6.07295e+06	Shared	2	895.949	2.126e-05	3.18
[K].QEKPAERPVETPVATTPTSTDSTSGDSSR.[S]	1xTMT6plex [K3]; 1xTMT6plex [N-Term]	1	1	5	W5PB94	W5PB94 [123-151]	0	3489.77	29	2.3708e+06	2.56541e+06	2.94633e+06	2.62801e+06	2.92437e+06	2.43041e+06		4	873.199	4.335e-07	3.97
[R].QEGVSQSTQAR.[G]	1xTMT6plex [N-Term]	1	1	4	W5QIW9	W5QIW9 [176-186]	0	1419.74	11	969583	856873	1.10038e+06	940472	1.0397e+06	899984		2	710.373	2.259e-05	2.27
[R].QEGKDQFVEVAEAPEATQASFPVHR.[A]	1xTMT6plex [K4]; 1xTMT6plex [N-Term]	1	1	2	W5P101	W5P101 [155-179]	1	3228.67	25	1.59011e+06	1.38384e+06	1.69653e+06	1.77828e+06	2.02052e+06	1.77651e+06		4	807.921	4.299e-06	6.18
[K].ELPQFATGENLPR.[V]	1xTMT6plex [N-Term]	1	1	8	W5NPT5	W5NPT5 [86-98]	0	1700.92	13	5.35578e+06	5.06483e+06	5.7729e+06	6.17027e+06	7.68204e+06	7.55981e+06		2	850.958	1.644e-05	2.85
[K].ELPQLVNDNFPVDPQR.[M]	1xTMT6plex [N-Term]	1	1	6	W5PE27	W5PE27 [137-152]	0	2110.11	16	4.32835e+06	3.94703e+06	4.93243e+06	4.96247e+06	5.29931e+06	4.91568e+06		2	1055.56	1.319e-07	3.95
[K].QEGGDNDLIER.[I]	1xTMT6plex [N-Term]	1	1	3	W5Q780	W5Q780 [424-434]	0	1474.73	11	679122	668014	889993	706549	786949	690959		2	737.869	2.185e-05	2.26
[R].KLAEQELIETSER.[V]	1xTMT6plex [K1]; 1xTMT6plex [N-Term]	1	2	3	W5QDF3	W5QDF3 [1700-1712]	1	2004.14	13	4.85395e+06	4.52122e+06	8466228	5.95175e+06	7.47509e+06	5.53567e+06		3	668.715	2.205e-05	4.3
[K].QEFMDGMTELGCDSIEK.[L]	1xCarbamidomethyl [C12]; 1xTMT6plex [K17]; 1xTMT6plex [N-Term]	1	1	3	W5QHK5	W5QHK5 [119-135]	0	2448.15	17	2.58312e+06	2.47677e+06	2.69751e+06	2.77559e+06	3.48696e+06	2.96258e+06		2	1224.57	3.465e-06	2.65
[K].ELPSFVGEK.[V]	1xTMT6plex [K9]; 1xTMT6plex [N-Term]	1	1	15	W5NRA2	W5NRA2 [42-50]	0	1463.85	9	8.54027e+07	8.10268e+07	9.13636e+07	1.24894e+08	1.61654e+08	1.44996e+08		2	732.424	2.858e-05	2.64
[K].EIPITVYTTK.[I]	1xTMT6plex [K10]; 1xTMT6plex [N-Term]	2	2	8	W5PK02; W5PK03	W5PK02 [663-672]; W5PK03 [663-672]	0	1622.98	10	2.73299e+07	2.57396e+07	2.63494e+07	2.20522e+07	2.44454e+07	21952336	Shared	2	811.986	6.873e-05	2.33
[R].ENLLEEQGSIALR.[Q]	1xTMT6plex [N-Term]	1	1	4	W5PJ75	W5PJ75 [1033-1045]	0	1700.94	13	1.33608e+06	1.27552e+06	1.38537e+06	1.38918e+06	1.62769e+06	1.32894e+06		2	850.976	1.817e-06	4.1
[R].LEDILPLAFTR.[L]	1xTMT6plex [N-Term]	1	1	3	W5PG93	W5PG93 [259-269]	0	1516.89	11	7.48082e+06	7261232	7.87435e+06	8.24611e+06	9.44718e+06	8.82277e+06		2	758.946	4.975e-05	3.26
[K].ELTYQTEEDRK.[N]	1xTMT6plex [K11]; 1xTMT6plex [N-Term]	5	6	4	W5PPG6; W5PT09; W5PBN5; W5QDF3; W5PIU1	W5PPG6 [1851-1861]; W5PT09 [1846-1856]; W5PBN5 [1848-1858]; W5QDF3 [1849-1859]; W5PIU1 [1862-1872]	1	1870	11	7.18281e+06	3.40959e+06	9.44976e+06	2.96018e+06	2.72134e+06	2.74849e+06	Shared	3	624.003	1.886e-05	3.7
[R].NWTEDMEGGISSPVK.[K]	1xTMT6plex [K15]; 1xTMT6plex [N-Term]	1	1	2	W5PSZ2	W5PSZ2 [238-252]	0	2108.07	15	2.62777e+06	2.60081e+06	2.90685e+06	2.7226e+06	2.93701e+06	2.66225e+06		2	1054.53	3.066e-07	3.62
[R].EMSGDLEQGMLAVVK.[C]	1xTMT6plex [K15]; 1xTMT6plex [N-Term]	1	2	2	W5PJM5	W5PJM5 [478-492]	0	2065.11	15	5.76952e+06	5.64925e+06	5289712	6.15252e+06	7279116	6.79903e+06		2	1033.05	2.539e-09	6.01
[R].EMSGDLEQGMLAVVK.[C]	1xOxidation [M2]; 1xTMT6plex [K15]; 1xTMT6plex [N-Term]	1	2	2	W5PJM5	W5PJM5 [478-492]	0	2081.1	15	711621	702895	1.05154e+06	777721	888031	871178		3	694.369	5.716e-05	2.65
[R].NWNTTLYEGTWR.[R]	1xTMT6plex [N-Term]	1	2	2	W5PVG1	W5PVG1 [378-389]	0	1769.88	12	3.60975e+06	3.42251e+06	4.12432e+06	4.57589e+06	4893301	4.45051e+06		2	885.438	1.461e-05	2.78
[R].NWNGSVEILK.[E]	1xDeamidated [N3]; 1xTMT6plex [K10]; 1xTMT6plex [N-Term]	1	1	4	W5PB04	W5PB04 [248-257]	0	1618.92	10	1.0077e+07	9519496	1.15208e+07	1.02651e+07	1.17685e+07	1.13575e+07		2	809.96	9.726e-05	3.15
[K].LEDTLWTGLTDSHIQMPMAITAENLAVK.[H]	1xDeamidated [Q15]; 1xTMT6plex [K28]; 1xTMT6plex [N-Term]	1	2	1	G3CH53	G3CH53 [144-171]	0	3557.86	28	326007	351308	419602	524962	550708	460940		3	1186.63	1.893e-06	5.38
[K].LEDTYFDRDVEK.[A]	1xTMT6plex [K12]; 1xTMT6plex [N-Term]	1	1	8	W5PFV0	W5PFV0 [352-363]	1	1988.04	12	2.2237e+07	1.95104e+07	2.66609e+07	3.21395e+07	3.72343e+07	3.54796e+07		3	663.345	6.59e-05	2.62
[K].EMVANWDSLR.[S]	1xTMT6plex [N-Term]	1	2	4	W5Q2Z5	W5Q2Z5 [782-791]	0	1449.74	10	6089487	5.83432e+06	6.89223e+06	7.1055e+06	8.4604e+06	7.70454e+06		2	725.369	4.342e-05	2.62
[R].EMVATQQEMNDAQLVLQQR.[D]	1xTMT6plex [N-Term]	1	1	2	W5P5V3	W5P5V3 [38-56]	0	2461.24	19	312813	332442	629023	385251	385227	348041		3	821.084	2.891e-06	5.58
[K].NVTELNEPLSNEER.[N]	1xTMT6plex [N-Term]	1	1	13	P68253	P68253 [6-19]	0	1872.95	14	2.99789e+06	2.37812e+06	3.15339e+06	3.3219e+06	4.06309e+06	3.4814e+06		2	936.979	3.689e-08	3.7
[R].EMVEMLFSDDPDLQLATTQK.[F]	1xTMT6plex [K20]; 1xTMT6plex [N-Term]	1	1	1	W5NR48	W5NR48 [89-108]	0	2769.41	20	449769	336604	460900	531745	529640	558957		3	923.803	1.2e-05	4.65
[R].NVTAIQGPGGK.[W]	1xTMT6plex [K11]; 1xTMT6plex [N-Term]	1	1	3	W5NR14	W5NR14 [67-77]	0	1499.89	11	3.3892e+06	3.25921e+06	4.03555e+06	4.00878e+06	4.76028e+06	4.37215e+06		2	750.446	3.669e-05	3.84
[K].NVSLNNFSADQVTR.[A]	1xDeamidated [N5]; 1xTMT6plex [N-Term]	1	1	1	W5QAH8	W5QAH8 [76-89]	0	1794.92	14	549166	529557	622638	630732	638826	610057		2	897.959	8.838e-06	3.4
[K].NVSLNNFSADQVTR.[A]	1xTMT6plex [N-Term]	1	1	1	W5QAH8	W5QAH8 [76-89]	0	1793.93	14	1.30967e+06	1.23819e+06	1.52601e+06	1359042	1.59856e+06	1.39195e+06		2	897.467	1.27e-07	3.82
[R].NVQSVSIVDTELK.[A]	1xTMT6plex [K13]; 1xTMT6plex [N-Term]	1	1	1	W5Q3H5	W5Q3H5 [46-58]	0	1890.09	13	595518	490986	672847	699985	675578	622584		2	945.547	8.702e-06	3.28
[R].EMYSASKPLK.[G]	2xTMT6plex [K7; K10]; 1xTMT6plex [N-Term]	1	2	6	W5PHX1	W5PHX1 [37-46]	0	1841.08	10	1.59462e+07	1.32948e+07	1.80901e+07	1.68059e+07	1.90711e+07	18314460		2	921.038	0.0001282	2.95
[K].ENAAYFQFFEEAQSTEAYLK.[G]	1xTMT6plex [K20]; 1xTMT6plex [N-Term]	1	1	4	W5Q7Z7	W5Q7Z7 [320-339]	0	2844.41	20	2.76633e+06	2.61124e+06	3.07929e+06	3.53891e+06	3.67224e+06	3.41351e+06		3	948.802	6.321e-07	4.36
[R].NVQDLAEDFK.[T]	1xDeamidated [Q3]; 1xTMT6plex [K10]; 1xTMT6plex [N-Term]	1	1	1	W5Q5S8	W5Q5S8 [205-214]	0	1637.88	10	979602	1.06091e+06	1.19885e+06	1.70768e+06	1.94918e+06	1.93868e+06		2	819.443	6.143e-05	3.35
[R].NVQDLAEDFK.[T]	1xTMT6plex [K10]; 1xTMT6plex [N-Term]	1	1	18	W5Q5S8	W5Q5S8 [205-214]	0	1636.89	10	7.82306e+07	8.28119e+07	9.07961e+07	1.42271e+08	1.71713e+08	1.70948e+08		2	818.95	1.462e-05	2.84
[K].KGVNLPGAAVDLPAVSEKDIQDLK.[F]	1xDeamidated [Q21]; 3xTMT6plex [K1; K18; K24]; 1xTMT6plex [N-Term]	1	1	1	W5QC41	W5QC41 [243-266]	2	3395	24	801781	629380	1.19617e+06	779050	912029	1.06638e+06		4	849.503	3.38e-07	4.14
[K].NVNTALNTTQIPSSIEDIFNDDR.[C]	1xTMT6plex [N-Term]	1	1	1	W5NW97	W5NW97 [274-296]	0	2806.41	23	232744	178289	261394	264938	291640	298981		3	936.135	4.018e-08	5.37
[K].NVNQEVVDFEK.[L]	1xTMT6plex [K11]; 1xTMT6plex [N-Term]	1	1	1	W5PEW4	W5PEW4 [94-104]	0	1778.97	11	468783	422508	524004	590071	680462	619296		2	889.985	2.273e-05	2.68
[R].NVNNEVHFFENNNFNTIANK.[L]	1xDeamidated [N13]; 1xTMT6plex [K20]; 1xTMT6plex [N-Term]	1	1	1	W5P328	W5P328 [145-164]	0	2838.42	20	737750	692525	814570	765595	974685	870639		3	946.809	2.779e-05	4.02
[R].EMQSQISDTSVVLSMDNNR.[N]	1xOxidation [M15]; 1xTMT6plex [N-Term]	1	1	1	W5Q5N9	W5Q5N9 [229-247]	0	2399.14	19	780095	629060	808063	901933	999784	881030		3	800.386	5.092e-05	1.73
[R].EMQSQISDTSVVLSMDNNR.[N]	1xTMT6plex [N-Term]	1	1	7	W5Q5N9	W5Q5N9 [229-247]	0	2383.14	19	1.89189e+06	1.49871e+06	2.20354e+06	1.93367e+06	2.03678e+06	2.22147e+06		2	1192.07	7.93e-08	3.25
[R].NWYQGAICGK.[K]	1xCarbamidomethyl [C8]; 1xTMT6plex [K10]; 1xTMT6plex [N-Term]	2	2	4	W5PK02; W5PK03	W5PK02 [62-71]; W5PK03 [62-71]	0	1654.88	10	5.68172e+06	6.13412e+06	6.1823e+06	9.44584e+06	1.03304e+07	8.8347e+06	Shared	2	827.938	1.985e-05	2.83
[K].NYDGDVQSDILAQGFGSLGLMTSVLVCPDGK.[T]	1xCarbamidomethyl [C27]; 1xTMT6plex [K31]; 1xTMT6plex [N-Term]	1	1	1	W5PR04	W5PR04 [292-322]	0	3714.88	31	49381.5	37819.5	48244	30453.1	37602	32684.2		3	1238.96	3.088e-08	3.14
[K].QAAEEQAQAQAQAQAAAEK.[L]	1xDeamidated [Q10]; 1xTMT6plex [K19]; 1xTMT6plex [N-Term]	1	1	2	W5Q2U7	W5Q2U7 [1955-1973]	0	2401.24	19	2.41885e+06	2.59899e+06	2.7883e+06	3.13602e+06	3.94127e+06	3.34845e+06		3	801.085	3.049e-06	4.19
[K].QAAEEQAQAQAQAQAAAEK.[L]	1xTMT6plex [K19]; 1xTMT6plex [N-Term]	1	1	1	W5Q2U7	W5Q2U7 [1955-1973]	0	2400.25	19	163561	150591	182584	189061	208368	187354		3	800.752	7.401e-07	3.99
[K].QAADMILLDDNFASIVTGVEEGR.[L]	1xTMT6plex [N-Term]	1	6	2	P04074	P04074 [742-764]	0	2693.37	23	728873	699683	872744	1.06012e+06	1.01851e+06	921495		3	898.458	6.985e-07	4.49
[K].QAADAEMEK.[H]	1xTMT6plex [K9]; 1xTMT6plex [N-Term]	1	1	12	W5Q2U7	W5Q2U7 [1997-2005]	0	1450.76	9	2.16133e+07	2.35697e+07	2.0877e+07	2.14568e+07	27163166	2.14621e+07		2	725.883	7.957e-05	2.48
[R].QAACQESESEEAGGAGGAR.[A]	1xCarbamidomethyl [C4]; 1xTMT6plex [N-Term]	1	1	1	W5Q8Q6	W5Q8Q6 [461-479]	0	2093.94	19	87286.2	62875	78242.6	73173.9	76967.4	79967.4		3	698.652	6.932e-06	3.58
[K].IEDPNQFVPLNTNPNEVLEK.[R]	1xTMT6plex [K20]; 1xTMT6plex [N-Term]	1	1	1	W5PHR3	W5PHR3 [485-504]	0	2768.49	20	616065	756027	632645	702740	857402	705142		2	1384.74	5.993e-07	4.09
[R].EMLNLYIENEGK.[M]	1xTMT6plex [K12]; 1xTMT6plex [N-Term]	1	1	2	W5PVL5	W5PVL5 [593-604]	0	1911.03	12	2.7223e+06	2.48372e+06	3.2332e+06	3.03498e+06	3.6351e+06	3.14868e+06		2	956.013	7.104e-06	4.39
[R].EMLNLYIENEGK.[M]	1xDeamidated [N]; 1xTMT6plex [K12]; 1xTMT6plex [N-Term]	1	1	3	W5PVL5	W5PVL5 [593-604]	0	1912.01	12	3.29173e+06	2.83248e+06	3.95367e+06	3.74348e+06	4.41432e+06	3.94556e+06		2	956.515	9.473e-05	3.9
[R].NYVEGTCVEWLR.[R]	1xCarbamidomethyl [C7]; 1xTMT6plex [N-Term]	2	3	1	R9WH56; R9WDP8	R9WH56 [179-190]; R9WDP8 [186-197]	0	1754.87	12	445568	408984	557700	1.70551e+06	1.99648e+06	1.82061e+06	Shared	2	877.941	3.279e-07	3.79
[K].NYTDNELEK.[I]	1xTMT6plex [K9]; 1xTMT6plex [N-Term]	1	2	7	W5NRK4	W5NRK4 [156-164]	0	1583.83	9	1.02715e+07	9.93376e+06	1.13578e+07	9.17855e+06	9.92901e+06	9.23584e+06		2	792.419	0.00011	2.73
[K].NYTDEAIETDDLTIK.[L]	1xTMT6plex [K15]; 1xTMT6plex [N-Term]	1	1	3	W5PZ65	W5PZ65 [143-157]	0	2199.14	15	1.42594e+06	1.08947e+06	1.45056e+06	1.27304e+06	1.50429e+06	1.33244e+06		2	1100.07	3.291e-06	2.45
[R].ENALLYDPESSSSSNK.[E]	1xTMT6plex [K16]; 1xTMT6plex [N-Term]	1	2	4	W5PQH2	W5PQH2 [364-379]	0	2199.12	16	1.5508e+06	1.38829e+06	1.74686e+06	1.65356e+06	1.91665e+06	1.6996e+06		2	1100.06	2.07e-06	3.02
[K].NYSCSEASADLEK.[L]	1xCarbamidomethyl [C4]; 1xTMT6plex [K13]; 1xTMT6plex [N-Term]	1	1	4	W5PYS9	W5PYS9 [31-43]	0	1931.94	13	3.42294e+06	3.05252e+06	3.54125e+06	3.24572e+06	3.2818e+06	3.18055e+06		2	966.475	5.015e-05	2.97
[K].KHEAIETDIAAYEER.[V]	1xTMT6plex [K1]; 1xTMT6plex [N-Term]	1	1	8	W5NZX9	W5NZX9 [463-477]	1	2233.19	15	5.66129e+06	5.6463e+06	6.36182e+06	5.9873e+06	6.79991e+06	6.80347e+06		3	745.068	1.491e-06	3.52
[K].EMNDAAMFYTNR.[V]	1xTMT6plex [N-Term]	1	2	12	W5QG16	W5QG16 [156-167]	0	1691.77	12	1.20074e+07	1.10526e+07	1.41128e+07	1.40483e+07	1.51964e+07	1.41249e+07		2	846.382	5.898e-06	3.53
[K].KHEAFETDFTVHK.[D]	2xTMT6plex [K1; K13]; 1xTMT6plex [N-Term]	1	1	3	W5PJ75	W5PJ75 [1916-1928]	1	2276.26	13	3.32163e+06	3.25689e+06	3.41614e+06	3.82736e+06	4.29442e+06	3.62233e+06		3	759.421	7.641e-06	3.51
[R].EMNEVETQFK.[A]	1xTMT6plex [K10]; 1xTMT6plex [N-Term]	1	1	1	W5Q8S5	W5Q8S5 [692-701]	0	1712.89	10	609915	587419	637863	810579	958341	899484		2	856.942	1.974e-05	3.76
[K].EMNPPDNIDNEGSDIIFFQR.[S]	1xTMT6plex [N-Term]	1	2	2	W5Q3V0	W5Q3V0 [121-140]	0	2580.22	20	381008	331702	553075	448634	492938	460469		2	1290.61	1.606e-05	2.2
[K].NYLPAINGIVFLVDCADHPR.[L]	1xCarbamidomethyl [C15]; 1xDeamidated [N7]; 1xTMT6plex [N-Term]	1	1	2	W5P7A1	W5P7A1 [88-107]	0	2514.3	20	1.40503e+06	1.27343e+06	1.70107e+06	1.66509e+06	1.72558e+06	1814879		3	838.764	6.066e-08	5.49
[K].IEDPNQFVPLNTNPNEVLEK.[R]	1xDeamidated [N11]; 1xTMT6plex [K20]; 1xTMT6plex [N-Term]	1	1	1	W5PHR3	W5PHR3 [485-504]	0	2769.47	20	504003	482778	608477	656917	725474	672799		3	923.83	0.0001002	4.2
[RK].KHEAFESDLAAHQDR.[V]	1xTMT6plex [K1]; 1xTMT6plex [N-Term]	3	4	3	W5P0L8; W5QJ62; W5P707	W5P0L8 [445-459]; W5QJ62 [408-422]; W5P707 [424-438]	1	2212.15	15	5.68794e+06	5.32134e+06	6.289e+06	7.08516e+06	6.50679e+06	5.67706e+06	Shared	3	738.051	6.578e-06	2.74
[R].NYGILADATEQVGQHK.[D]	1xDeamidated [Q11]; 1xTMT6plex [K16]; 1xTMT6plex [N-Term]	1	1	1	W5NPT5	W5NPT5 [11-26]	0	2203.18	16	3.05064e+06	2.73484e+06	3.47102e+06	2.99376e+06	3.83319e+06	3.58734e+06		3	735.066	8.846e-05	3.76
[R].EMQDLGGGER.[T]	1xTMT6plex [N-Term]	1	1	13	W5P9B0	W5P9B0 [648-657]	0	1320.64	10	5.76216e+07	6.1437e+07	5.98338e+07	6.20831e+07	7.47511e+07	6.98819e+07		2	660.824	5.452e-06	3.22
[K].EMQDLSEFCSDKPK.[S]	1xCarbamidomethyl [C9]; 2xTMT6plex [K12; K14]; 1xTMT6plex [N-Term]	1	1	1	W5PVI0	W5PVI0 [275-288]	0	2401.23	14	4.21035e+06	4280690	4372540	4.45895e+06	5.09381e+06	4755334		3	801.077	7.714e-07	3.51
[R].NYPATFWVNPQFK.[I]	1xTMT6plex [K13]; 1xTMT6plex [N-Term]	1	2	2	W5PVG1	W5PVG1 [399-411]	0	2070.12	13	2858830	2.68477e+06	3.27556e+06	3.72068e+06	3789305	3349789		2	1035.56	1.814e-05	3.46
[R].LEDPDGNVLYK.[E]	1xTMT6plex [K11]; 1xTMT6plex [N-Term]	1	1	7	W5Q4H1	W5Q4H1 [78-88]	0	1720.95	11	1.50633e+07	1.40095e+07	1.59323e+07	1.45902e+07	1.6451e+07	1.48898e+07		2	860.974	1.79e-06	3.48
[R].ENALQDTVLAR.[E]	1xTMT6plex [N-Term]	1	1	5	W5NUY7	W5NUY7 [2481-2491]	0	1458.81	11	2.82993e+06	2.66901e+06	2.78131e+06	3.04671e+06	3.43965e+06	2.90625e+06		2	729.904	7.759e-05	2.65
[K].ENAPAIIFIDEIDAIATK.[R]	1xTMT6plex [K18]; 1xTMT6plex [N-Term]	1	1	1	W5P8Z3	W5P8Z3 [256-273]	0	2402.36	18	941619	818766	902753	1081747	1.14334e+06	1014586		3	801.457	3.5e-07	4.43
[R].KGVCESISGIYEK.[T]	1xCarbamidomethyl [C4]; 2xTMT6plex [K1; K13]; 1xTMT6plex [N-Term]	1	1	2	W5P812	W5P812 [88-100]	1	2157.22	13	3.3409e+06	2.775e+06	3.8463e+06	4.10264e+06	4.85652e+06	4.46961e+06		3	719.739	8.194e-05	2.63
[R].NVDQEELVK.[I]	1xDeamidated [N/Q]; 1xTMT6plex [K9]; 1xTMT6plex [N-Term]	1	1	9	W5QCP9	W5QCP9 [1351-1359]	0	1532.86	9	5.71303e+06	4.44293e+06	5.44455e+06	5.39056e+06	6.03053e+06	4.96157e+06		2	766.932	7.878e-05	3.03
[K].ENGAYFEFFNDAK.[E]	1xDeamidated [N2]; 1xTMT6plex [K13]; 1xTMT6plex [N-Term]	1	1	2	W5P7J8	W5P7J8 [803-815]	0	2010.98	13	2.16995e+06	2.05328e+06	2108871	2.41466e+06	2.44904e+06	2.31157e+06		2	1005.99	2.915e-07	3.92
[R].NVDQEELVK.[I]	1xTMT6plex [K9]; 1xTMT6plex [N-Term]	1	1	47	W5QCP9	W5QCP9 [1351-1359]	0	1531.87	9	2.56342e+08	2.69989e+08	2.42178e+08	2.40187e+08	2.90295e+08	2.55841e+08		2	766.438	4.586e-05	2.58
[K].NVDLLSDMVQEHDEPILK.[H]	1xTMT6plex [K18]; 1xTMT6plex [N-Term]	1	5	8	W5QFF1	W5QFF1 [177-194]	0	2553.36	18	1.73234e+07	1.45261e+07	1.90469e+07	1.69932e+07	2.00876e+07	1.57267e+07		3	851.789	2.541e-09	5.88
[R].NVDDLNKDQLQLR.[E]	1xTMT6plex [K7]; 1xTMT6plex [N-Term]	1	2	1	W5QJ27	W5QJ27 [355-367]	1	2029.14	13	1.99821e+06	1.87938e+06	2243455	2186369	2682135	2.45127e+06		3	677.052	5.437e-05	3.45
[R].NVCTEAGMFAIR.[A]	1xCarbamidomethyl [C3]; 1xTMT6plex [N-Term]	1	1	4	W5Q805	W5Q805 [359-370]	0	1597.8	12	6.63762e+06	6.43267e+06	8.78535e+06	9.45643e+06	1.10832e+07	1.04348e+07		2	799.399	7.462e-06	3.54
[R].KGVAINMVTEEDKR.[T]	1xOxidation [M7]; 2xTMT6plex [K1; K13]; 1xTMT6plex [N-Term]	1	1	4	W5PYK0	W5PYK0 [370-383]	2	2293.32	14	8.8178e+06	8.30374e+06	1.05139e+07	1.06067e+07	1.30233e+07	1.20309e+07		3	765.113	9.923e-05	3.13
[R].NVAQYNANHPDFPMQSEQLER.[Y]	1xDeamidated [N8]; 1xTMT6plex [N-Term]	1	1	2	W5NYP8	W5NYP8 [2468-2488]	0	2718.28	21	1.2344e+06	1.0974e+06	1.22207e+06	1.39246e+06	1431458	1.27476e+06		3	906.767	1.248e-07	5.31
[R].NVAQYNANHPDFPMQSEQLER.[Y]	1xTMT6plex [N-Term]	1	1	1	W5NYP8	W5NYP8 [2468-2488]	0	2717.29	21	512110	427386	519028	607908	605193	533802		3	906.428	3.487e-09	6
[R].ENGIYLIDVK.[F]	1xDeamidated [N2]; 1xTMT6plex [K10]; 1xTMT6plex [N-Term]	1	1	8	W5P5A0	W5P5A0 [2382-2391]	0	1622.94	10	3.25608e+07	3.18933e+07	3.34747e+07	2.95869e+07	3.52872e+07	2.99046e+07		2	811.97	7.653e-05	3.04
[R].ENGTVTAANASTLNDGAAAVVLMTADAAK.[R]	1xTMT6plex [K29]; 1xTMT6plex [N-Term]	1	1	1	W5PN85	W5PN85 [272-300]	0	3205.68	29	450861	423704	474585	499354	633744	489312		4	802.169	8.855e-06	5.84
[R].ENGTVTAANASTLNDGAAAVVLMTADAAK.[R]	1xDeamidated [N2]; 1xTMT6plex [K29]; 1xTMT6plex [N-Term]	1	1	2	W5PN85	W5PN85 [272-300]	0	3206.66	29	2.02531e+06	1.79876e+06	2.00055e+06	1.48682e+06	1.53175e+06	1.84449e+06		3	1069.55	2.27e-10	7.48
[R].ENGTVTAANASTLNDGAAAVVLMTADAAK.[R]	2xDeamidated [N9; N]; 1xTMT6plex [K29]; 1xTMT6plex [N-Term]	1	1	2	W5PN85	W5PN85 [272-300]	0	3207.65	29	1.61116e+06	1.66302e+06	1.43841e+06	872502	1.11611e+06	957164		3	1069.89	2.466e-05	3.6
[R].ENGVHSLVIEPVSAR.[D]	1xDeamidated [N2]; 1xTMT6plex [N-Term]	1	1	8	W5Q1W7	W5Q1W7 [962-976]	0	1837	15	4.40807e+06	4.53673e+06	7.44847e+06	3.80563e+06	4.23288e+06	3.78798e+06		2	918.998	8.106e-07	2.76
[K].NVAQVAEDTVLQNR.[V]	1xTMT6plex [N-Term]	1	1	7	W5QI12	W5QI12 [691-704]	0	1785.97	14	1.50292e+06	1.3965e+06	1.64435e+06	1.74478e+06	2.04505e+06	2.04447e+06		2	893.488	2.477e-05	3
[K].NVAGEIVLITGAGSGLGR.[L]	1xTMT6plex [N-Term]	1	2	1	C5IS98	C5IS98 [37-54]	0	1913.1	18	1.56256e+06	1.56203e+06	1807628	1779173	2.08156e+06	1.96565e+06		2	957.047	2.873e-06	4.12
[R].IEDVTPIPSDSTR.[R]	1xTMT6plex [N-Term]	1	1	8	W5PBP1	W5PBP1 [138-150]	0	1658.88	13	1.30509e+07	1.29263e+07	1.4554e+07	1.30041e+07	1.51089e+07	1.51761e+07		2	829.939	9.737e-06	3.35
[R].NTVEITELPVR.[T]	1xTMT6plex [N-Term]	1	1	4	W5P2D1	W5P2D1 [933-943]	0	1499.86	11	2.25519e+06	2.04437e+06	2.47939e+06	2.42392e+06	2.69564e+06	2.56597e+06		2	750.437	0.0001024	3.22
[K].NTVELLVEDR.[G]	1xTMT6plex [N-Term]	1	1	5	W5PT68	W5PT68 [400-409]	0	1416.79	10	1.69895e+06	1.54602e+06	1.66529e+06	1.97662e+06	2.38625e+06	2.13487e+06		2	708.901	1.42e-05	3.01
[R].KGVAINMVTEEDKR.[T]	2xTMT6plex [K1; K13]; 1xTMT6plex [N-Term]	1	1	3	W5PYK0	W5PYK0 [370-383]	2	2277.32	14	1.50095e+07	1.46897e+07	1.59179e+07	1.41143e+07	1.72001e+07	1.58415e+07		3	759.773	3.972e-10	4.7
[R].NTTVLAMDQVPR.[V]	1xTMT6plex [N-Term]	1	2	1	W5PFI3	W5PFI3 [171-182]	0	1573.86	12	3829894	3330393	4.3953e+06	3291120	4413332	3.72105e+06		2	787.426	0.0001028	2.49
[K].ENLIAELEEK.[K]	1xTMT6plex [K10]; 1xTMT6plex [N-Term]	1	1	2	W5NWF0	W5NWF0 [101-110]	0	1645.94	10	690296	677156	790778	540901	652924	680437		2	823.473	1.341e-05	3.23
[R].NVDVVLEDSCTVGEIK.[Q]	1xCarbamidomethyl [C10]; 1xTMT6plex [K16]; 1xTMT6plex [N-Term]	1	1	2	W5P2F6	W5P2F6 [111-126]	0	2235.19	16	337270	276226	373778	345978	411615	380985		2	1118.1	1.264e-06	2.83
[K].IEDVGSDEEDDSGKDKK.[K]	3xTMT6plex [K14; K16; K17]; 1xTMT6plex [N-Term]	1	1	1	W5PHW0	W5PHW0 [250-266]	2	2782.48	17	906116	868884	1.15447e+06	820138	997192	869391		4	696.377	5.073e-07	4.6
[R].NVEDDYIANLR.[N]	1xTMT6plex [N-Term]	1	2	1	W5PB76	W5PB76 [317-327]	0	1550.8	11	363188	287773	378374	321910	347166	354958		2	775.905	9.92e-05	2.49
[R].NVEDLSGGELQR.[F]	1xTMT6plex [N-Term]	1	1	7	W5PJ03	W5PJ03 [213-224]	0	1545.81	12	2.73049e+06	2332204	3.17645e+06	2.58536e+06	2.90139e+06	2.73354e+06		2	773.406	1.609e-06	3.19
[K].NVMSAFGLTDDQVSGPPSAPAEDR.[S]	1xTMT6plex [N-Term]	1	1	1	W5Q9Q0	W5Q9Q0 [181-204]	0	2690.29	24	2.36895e+06	2.48115e+06	2.81519e+06	2.9935e+06	3.25157e+06	2.68763e+06		3	897.432	8.162e-05	2.96
[K].ENAYDLEANLAVLK.[L]	1xTMT6plex [K14]; 1xTMT6plex [N-Term]	1	1	2	W5P6X4	W5P6X4 [39-52]	0	2021.13	14	1.99064e+06	1.80472e+06	2.41169e+06	2.08235e+06	2.06988e+06	1.99801e+06		2	1011.06	1.987e-08	4.8
[K].ENDAVTIQVLNQLIQK.[I]	1xTMT6plex [K16]; 1xTMT6plex [N-Term]	1	1	5	W5Q1R1	W5Q1R1 [733-748]	0	2284.33	16	3.8908e+06	3.79821e+06	4.50998e+06	4.43011e+06	5.21419e+06	4709239		2	1142.66	1.015e-06	3.58
[R].NVLVSEDNVAK.[V]	1xTMT6plex [K11]; 1xTMT6plex [N-Term]	1	1	1	W5NZ63	W5NZ63 [319-329]	0	1645.95	11	2.32526e+06	2.24026e+06	2.53647e+06	2.74216e+06	3.18174e+06	2.97727e+06		2	823.475	9.994e-06	4.81
[K].NVLSLTDKGEVFNELVGK.[Q]	2xTMT6plex [K8; K18]; 1xTMT6plex [N-Term]	1	2	2	B0FYY4	B0FYY4 [221-238]	1	2649.54	18	16264519	16927161	17437605	1.73905e+07	20636990	1.82486e+07		3	883.847	1.284e-06	3.5
[K].NVIQSVLQAIR.[K]	1xTMT6plex [N-Term]	1	1	4	W5Q2K9	W5Q2K9 [505-515]	0	1469.9	11	3.53218e+06	3155666	3.70621e+06	4602732	4.81189e+06	4.49761e+06		2	735.447	6.089e-05	2.99
[K].NVLIVEDIIDTGK.[T]	1xTMT6plex [K13]; 1xTMT6plex [N-Term]	1	2	4	W5PR48	W5PR48 [129-141]	0	1887.12	13	2.82954e+06	2.68708e+06	3.43362e+06	3.17657e+06	3.8791e+06	3.68518e+06		2	944.059	3.761e-07	5.23
[R].ENDFLTFDAMR.[H]	1xTMT6plex [N-Term]	1	1	1	W5PJF6	W5PJF6 [651-661]	0	1587.77	11	920770	781830	1.01971e+06	839213	933154	897173		2	794.383	2.354e-05	3.1
[R].ENDKQETWMLIELQK.[I]	2xTMT6plex [K4; K15]; 1xTMT6plex [N-Term]	1	1	5	W5Q7Z7	W5Q7Z7 [606-620]	1	2592.43	15	9.78883e+06	9597490	1.00773e+07	1.2681e+07	1.4854e+07	1.30063e+07		3	864.807	1.858e-07	5.01
[K].KGVNLPGAAVDLPAVSEK.[D]	2xTMT6plex [K1; K18]; 1xTMT6plex [N-Term]	1	1	13	W5QC41	W5QC41 [243-260]	1	2452.47	18	1.66878e+07	1.58131e+07	2.08448e+07	2.14257e+07	2.65459e+07	2.44289e+07		3	818.159	6.502e-09	5.76
[R].NVLLDPQLVPGGGASEMAVAHALTEK.[S]	1xTMT6plex [K26]; 1xTMT6plex [N-Term]	1	1	4	W5P765	W5P765 [432-457]	0	3075.69	26	16426534	1.54125e+07	1.84115e+07	2.18616e+07	2.70788e+07	2.47712e+07		3	1025.9	1.854e-06	5.16
[R].NVNNEVHFFENNNFNTIANK.[L]	1xTMT6plex [K20]; 1xTMT6plex [N-Term]	1	1	1	W5P328	W5P328 [145-164]	0	2837.44	20	550473	544235	698645	645863	781103	742633		3	946.478	2.553e-05	3.5
[K].NVIGLQMGTNR.[G]	1xTMT6plex [N-Term]	1	1	8	W5PE01	W5PE01 [210-220]	0	1431.79	11	1.38759e+07	1.31508e+07	1.61374e+07	1.62235e+07	1.9386e+07	1.81391e+07		2	716.395	3.305e-05	2.31
[K].NVIFEISPTEEVGDFEVK.[A]	1xTMT6plex [K18]; 1xTMT6plex [N-Term]	1	1	2	W5PU66	W5PU66 [1640-1657]	0	2510.34	18	2.71427e+06	2.57772e+06	3.05096e+06	3.08078e+06	3.3262e+06	3.32535e+06		2	1255.68	1.146e-06	3.47
[R].ENDPVLGADGK.[L]	1xTMT6plex [K11]; 1xTMT6plex [N-Term]	2	2	7	W5P1K9; W5P1K5	W5P1K9 [962-972]; W5P1K5 [1061-1071]	0	1572.86	11	1.88962e+06	1.63964e+06	2.14002e+06	2.93707e+06	3.34299e+06	2.90494e+06	Shared	2	786.934	3.838e-06	3.16
[K].NVHLAPGWLMQLEK.[K]	1xTMT6plex [K14]; 1xTMT6plex [N-Term]	1	1	2	W5NYP8	W5NYP8 [4080-4093]	0	2094.19	14	3.6118e+06	3.21348e+06	4.14294e+06	4836593	5.59527e+06	4967575		3	698.73	9.168e-05	3.87
[R].NVHGINFVTPVR.[N]	1xTMT6plex [N-Term]	1	1	3	W5P1H0	W5P1H0 [239-250]	0	1581.91	12	1.82202e+06	1.83221e+06	2.28321e+06	2.30042e+06	3.05545e+06	2.83961e+06		3	527.969	0.0001241	3.97
[K].NVGQFSGFPFEK.[G]	1xTMT6plex [K12]; 1xTMT6plex [N-Term]	1	2	5	W5PKS6	W5PKS6 [117-128]	0	1814.98	12	6.43581e+06	6.40635e+06	7.25833e+06	6.62638e+06	8.06913e+06	7.07001e+06		2	907.988	1.282e-06	3.84
[K].NVGLDIEAEVPAVK.[D]	1xTMT6plex [K14]; 1xTMT6plex [N-Term]	1	1	1	W5PYM5	W5PYM5 [477-490]	0	1912.12	14	354205	313946	451405	429482	493521	431161		3	638.041	0.0001202	3.5
[K].NVFIIGATNRPDIIDPAILRPGR.[L]	1xTMT6plex [N-Term]	1	1	3	W5PRJ4	W5PRJ4 [616-638]	0	2747.59	23	4.47543e+06	4.12791e+06	5.43238e+06	5.54835e+06	6.36609e+06	5.65277e+06		4	687.648	1.982e-05	3.29
[K].NVFIECTGTDFTK.[A]	1xCarbamidomethyl [C6]; 1xTMT6plex [K13]; 1xTMT6plex [N-Term]	1	1	1	W5QGI4	W5QGI4 [250-262]	0	1990.04	13	1.16701e+06	1.06085e+06	1.26783e+06	1.50302e+06	1.4625e+06	1.35852e+06		2	995.518	1.979e-06	4.51
[K].NVFDEAILAALEPPEPK.[K]	1xTMT6plex [K17]; 1xTMT6plex [N-Term]	1	2	9	M4WED3	M4WED3 [167-183]	0	2311.29	17	1.65417e+07	1.57904e+07	1.89024e+07	1.97368e+07	2.31132e+07	2.2531e+07		3	771.099	2.479e-08	4.9
[R].NVETMNYADIER.[T]	1xTMT6plex [N-Term]	1	1	3	W5NTS6	W5NTS6 [336-347]	0	1683.82	12	1.55419e+06	1.49473e+06	1.8242e+06	1.31114e+06	1.50688e+06	1.26766e+06		2	842.406	4.335e-07	3.44
[R].NVEGQDMLYQSLK.[L]	1xTMT6plex [K13]; 1xTMT6plex [N-Term]	1	1	5	W5P8Q0	W5P8Q0 [894-906]	0	1983.06	13	4.50822e+06	4.51391e+06	5.2574e+06	5.01839e+06	5.5422e+06	4.93416e+06		2	992.03	1.62e-06	3.23
[K].NVLFSHLDDNER.[S]	1xTMT6plex [N-Term]	1	4	1	W5Q086	W5Q086 [134-145]	0	1687.86	12	1.27302e+06	939988	1.21857e+06	1.14609e+06	1.36483e+06	1.10224e+06		2	844.429	0.0001021	2.82
[R].QAAGDYLGVALR.[G]	1xTMT6plex [N-Term]	1	1	1	W5PVM5	W5PVM5 [2701-2712]	0	1462.82	12	2.64611e+06	2.57544e+06	2939516	2687263	2.80446e+06	2.63034e+06		2	731.912	2.001e-05	3.56
[K].QAALEEEQAR.[L]	1xTMT6plex [N-Term]	1	2	8	W5P3H9	W5P3H9 [291-300]	0	1373.72	10	2.06235e+06	1.79475e+06	2.18648e+06	1.79022e+06	2.21336e+06	1.9748e+06		2	687.366	3.638e-05	2.77
[R].EMGLPPETEAVLDKDMAAPPETEVIVPVR.[D]	1xOxidation [M16]; 1xTMT6plex [K14]; 1xTMT6plex [N-Term]	1	1	1	W5NXB5	W5NXB5 [425-453]	1	3607.9	29	180084	137697	203731	226945	262641	259626		4	902.73	3.483e-05	2.58
[K].EIVLSAGSTPK.[I]	1xTMT6plex [K11]; 1xTMT6plex [N-Term]	1	1	1	W5NYP8	W5NYP8 [3909-3919]	0	1559.94	11	2.19046e+06	2164440	2.63767e+06	2.62906e+06	2.96919e+06	2.72576e+06		2	780.472	4.372e-05	3.59
[R].QAQQERDELADEIANSSGK.[G]	1xDeamidated [N/Q]; 1xTMT6plex [K19]; 1xTMT6plex [N-Term]	1	1	2	W5QBQ9	W5QBQ9 [1663-1681]	1	2548.29	19	396583	377950	509677	478718	588267	532574		3	850.105	6.91e-05	3.31
[R].QAQQERDELADEIANSSGK.[G]	1xTMT6plex [K19]; 1xTMT6plex [N-Term]	1	1	3	W5QBQ9	W5QBQ9 [1663-1681]	1	2547.31	19	897985	787732	1003483	1.05009e+06	1.19303e+06	1.05668e+06		3	849.774	2.923e-06	4.45
[K].ELVNNLGEIYQK.[I]	1xTMT6plex [K12]; 1xTMT6plex [N-Term]	1	1	1	W5PL84	W5PL84 [285-296]	0	1878.07	12	1.55233e+06	1.45951e+06	1.74462e+06	1.40356e+06	1639521	1498303		2	939.537	2.538e-06	3.6
[R].QAQQAMDAHLQR.[T]	1xTMT6plex [N-Term]	1	2	5	W5PZI1	W5PZI1 [247-258]	0	1625.84	12	4.81237e+06	4.73182e+06	5.25909e+06	5.6542e+06	6.84761e+06	6.2483e+06		3	542.616	5.2e-08	5.6
[R].ELVPESQAYMDLLAFER.[K]	1xTMT6plex [N-Term]	2	5	2	W5PWL4; W5Q9A1	W5PWL4 [104-120]; W5Q9A1 [77-93]	0	2240.15	17	239299	204791	256996	321214	281773	296677	Shared	2	1120.57	2.715e-06	2.83
[K].QAQILASEAEK.[A]	1xTMT6plex [K11]; 1xTMT6plex [N-Term]	1	1	4	W5PRD7	W5PRD7 [223-233]	0	1645.95	11	3.75239e+06	3.71615e+06	4.51096e+06	3.48513e+06	4.0028e+06	3.55071e+06		2	823.477	9.31e-06	3.72
[K].EIVQEGDHMIIR.[T]	1xTMT6plex [N-Term]	1	1	6	W5PAM5	W5PAM5 [42-53]	0	1668.89	12	4.32102e+06	3.65712e+06	4.48726e+06	4.57248e+06	5.33904e+06	4.67216e+06		3	556.967	2.836e-06	5.42
[R].QAQIEVVPSASALIIK.[A]	1xTMT6plex [K16]; 1xTMT6plex [N-Term]	1	2	11	W5PNV0	W5PNV0 [94-109]	0	2125.3	16	1.69697e+07	1.66835e+07	1.86702e+07	1.95893e+07	2.29622e+07	2.05268e+07		2	1063.15	4.59e-09	5.49
[K].QAPQTIHLPSGEVLDVFDAAER.[Y]	1xTMT6plex [N-Term]	1	1	1	W5PZ94	W5PZ94 [751-772]	0	2622.37	22	290919	279968	393164	371906	392644	351672		3	874.79	3.409e-08	6.07
[K].QAPGPAPDYSSYFKTIEDLR.[N]	1xDeamidated [Q1]; 1xTMT6plex [K14]; 1xTMT6plex [N-Term]	1	2	2	U3MXA9	U3MXA9 [131-150]	1	2714.41	20	1.46024e+06	1.27389e+06	1.97839e+06	1.5248e+07	3.24931e+06	1.11852e+07		3	905.474	8.697e-08	3.29
[R].ELVSCSNCTDYQAR.[R]	2xCarbamidomethyl [C5; C8]; 1xTMT6plex [N-Term]	1	1	4	W5QCS4	W5QCS4 [391-404]	0	1931.88	14	3.56732e+06	2.56455e+06	3.47086e+06	2.87292e+06	3125505	2.87132e+06		2	966.448	1.049e-07	3.54
[K].QAPGPAPDYSSYFK.[T]	1xTMT6plex [K14]; 1xTMT6plex [N-Term]	1	2	6	U3MXA9	U3MXA9 [131-144]	0	1986.04	14	4.60029e+07	4.38708e+07	5.0179e+07	6.64207e+07	5.7913e+07	5.79608e+07		2	993.519	7.375e-07	5.52
[R].ELVSCSNCTDYQAR.[R]	2xCarbamidomethyl [C5; C8]; 2xDeamidated [N7; Q12]; 1xTMT6plex [N-Term]	1	1	2	W5QCS4	W5QCS4 [391-404]	0	1933.85	14	477963	378844	517146	472646	507317	478557		2	967.435	6.412e-05	2.2
[R].KHNMCGETEEEMIR.[M]	1xCarbamidomethyl [C5]; 1xTMT6plex [K1]; 1xTMT6plex [N-Term]	1	1	5	W5QDD0	W5QDD0 [94-107]	1	2222.08	14	1.52375e+07	1.34599e+07	1.6892e+07	1.8375e+07	2.06295e+07	1.98617e+07		3	741.361	1.651e-06	5.16
[K].QAPGAAGLSQDR.[Q]	1xTMT6plex [N-Term]	1	1	4	W5P4R9	W5P4R9 [158-169]	0	1399.75	12	8.30887e+06	8.74601e+06	9.09283e+06	9.5392e+06	1.20915e+07	1.09168e+07		2	700.378	1.283e-06	3.34
[R].QALVEFENIDSAK.[E]	1xTMT6plex [K13]; 1xTMT6plex [N-Term]	1	1	1	W5PGK6	W5PGK6 [50-62]	0	1922.06	13	517190	380125	482270	464780	532559	425405		2	961.528	0.0001049	2.25
[K].QALTNIGEILK.[A]	1xTMT6plex [K11]; 1xTMT6plex [N-Term]	1	1	3	W5P8I3	W5P8I3 [57-67]	0	1658.03	11	6.45843e+06	5.75437e+06	7.48532e+06	7.65439e+06	9.46356e+06	9.06387e+06		2	829.509	2.595e-06	3.67
[R].ELVTELFGSQVQPEAQDR.[G]	1xTMT6plex [N-Term]	1	1	3	W5PVJ7	W5PVJ7 [42-59]	0	2275.18	18	861515	850960	1019610	814683	1.01668e+06	857063		2	1138.08	1.34e-09	4.17
[K].QALQDTLALYK.[M]	1xTMT6plex [K11]; 1xTMT6plex [N-Term]	1	1	2	W5NZX9	W5NZX9 [843-853]	0	1722.02	11	2.70499e+06	2.59659e+06	3.11644e+06	3.06639e+06	3.72878e+06	3.40847e+06		2	861.508	2.266e-05	2.17
[K].ELVTQQLPHLLK.[D]	1xTMT6plex [K12]; 1xTMT6plex [N-Term]	1	1	6	W5NWK5	W5NWK5 [40-51]	0	1877.16	12	1.8556e+07	1.80965e+07	2.04433e+07	1.92254e+07	2.40555e+07	2.0859e+07		2	939.078	6.611e-05	2.83
[R].QALQDLLSEYMGNAGR.[K]	1xTMT6plex [N-Term]	1	1	4	W5Q5C7	W5Q5C7 [342-357]	0	1995.02	16	4.91957e+06	4.61191e+06	4.4997e+06	5.05161e+06	5.42269e+06	4.64645e+06		2	998.002	2.257e-07	3.32
[R].QAIPLDENEGIYVQDVK.[T]	1xTMT6plex [K17]; 1xTMT6plex [N-Term]	1	1	7	W5P5Q2	W5P5Q2 [380-396]	0	2389.3	17	3.04454e+06	2.96148e+06	3.85157e+06	4.35509e+06	4.59836e+06	4.16632e+06		3	797.105	1.681e-05	3.18
[K].ELVLNGADTAVNK.[Q]	1xDeamidated [N5]; 1xTMT6plex [K13]; 1xTMT6plex [N-Term]	1	1	3	W5P440	W5P440 [878-890]	0	1803.03	13	1.62709e+06	1.49523e+06	2.0006e+06	1.94605e+06	2.00024e+06	1.9413e+06		2	902.011	7.553e-07	4.18
[K].QASEQNWANYSAEQNR.[M]	1xTMT6plex [N-Term]	1	1	6	W5QFD5	W5QFD5 [304-319]	0	2124.99	16	1.39695e+06	1.33194e+06	1.5934e+06	1.6859e+06	1.7681e+06	1.51629e+06		2	1063	1.268e-08	3.79
[R].QASMADYEETVEK.[A]	1xTMT6plex [K13]; 1xTMT6plex [N-Term]	1	1	6	W5QAE8	W5QAE8 [82-94]	0	1958.98	13	1.68192e+06	1.70785e+06	1.85935e+06	1.77544e+06	2.0354e+06	1.85149e+06		2	979.992	6.71e-08	3.97
[K].QASNLETAIADAEQR.[G]	1xTMT6plex [N-Term]	1	3	33	G3ER51	G3ER51 [370-384]	0	1845.95	15	3.05216e+06	2.65248e+06	3.42706e+06	3.51075e+06	3.83684e+06	3.71127e+06		2	923.477	2.422e-09	3.46
[K].EIVAEDDQVFLMK.[L]	1xTMT6plex [K13]; 1xTMT6plex [N-Term]	1	1	4	W5Q0Q2	W5Q0Q2 [301-313]	0	1995.09	13	1.69042e+06	1.54059e+06	1.80824e+06	1.82582e+06	2.0368e+06	1.90438e+06		2	998.046	1.026e-07	5.41
[R].QAVELSPDDQYIK.[V]	1xTMT6plex [K13]; 1xTMT6plex [N-Term]	1	1	2	W5PZI8	W5PZI8 [200-212]	0	1964.07	13	772784	705835	791575	494748	514851	471514		2	982.54	6.211e-05	3.33
[K].KHPDASVNFSEFSK.[K]	1xDeamidated [N8]; 2xTMT6plex [K1; K14]; 1xTMT6plex [N-Term]	2	4	1	W5Q6J0; W5P5Q1	W5Q6J0 [30-43]; W5P5Q1 [23-36]	1	2281.24	14	1.56329e+06	1.71899e+06	1.58559e+06	1.38777e+06	1.62479e+06	1.20807e+06	Shared	2	1141.13	2.677e-05	2.55
[K].QATVGDINTERPGMLDFK.[G]	1xDeamidated [N8]; 1xTMT6plex [K18]; 1xTMT6plex [N-Term]	1	1	4	W5PSF3	W5PSF3 [48-65]	0	2451.3	18	4.4226e+06	4.16387e+06	5.04916e+06	5.26513e+06	7.11732e+06	4.93375e+06		2	1226.16	7.203e-08	3.06
[K].QATVGDINTERPGMLDFK.[G]	1xTMT6plex [K18]; 1xTMT6plex [N-Term]	1	1	9	W5PSF3	W5PSF3 [48-65]	0	2450.31	18	3.98605e+07	3.50978e+07	4.628e+07	4.49283e+07	6.55743e+07	3.73014e+07		3	817.438	1.135e-08	3.6
[K].EIVDPLYGIAEVEIPNIQK.[Q]	1xTMT6plex [K19]; 1xTMT6plex [N-Term]	1	2	1	W5QAB0	W5QAB0 [101-119]	0	2598.48	19	748880	684697	865658	991671	1.13122e+06	1.07627e+06		3	866.828	7.794e-05	3.97
[K].QATPPIELDAVWEDIR.[E]	1xTMT6plex [N-Term]	1	1	2	W5PE89	W5PE89 [678-693]	0	2082.11	16	133199	131734	157968	149997	153194	149293		3	694.706	6.655e-05	3.57
[K].QATENAKEEVR.[R]	1xTMT6plex [K7]; 1xTMT6plex [N-Term]	1	1	4	W5Q0L1	W5Q0L1 [244-254]	1	1732.96	11	2.2873e+06	1.74627e+06	2.76013e+06	1.96366e+06	2.39898e+06	2.24465e+06		2	866.98	0.0001266	3.24
[K].EIVEESDIMLK.[E]	1xTMT6plex [K11]; 1xTMT6plex [N-Term]	1	2	1	W5P955	W5P955 [133-143]	0	1763.99	11	208905	186869	244550	246488	252466	247459		2	882.497	0.0001098	3.12
[K].ELVEFAQDDDR.[L]	1xTMT6plex [N-Term]	1	1	3	W5PTB6	W5PTB6 [134-144]	0	1565.76	11	164122	190682	195699	226807	270117	255183		2	783.386	8.789e-07	3.52
[K].QATEGPCNVPKPGMLDFINK.[T]	1xCarbamidomethyl [C7]; 2xTMT6plex [K11; K20]; 1xTMT6plex [N-Term]	1	1	2	W5NQ36	W5NQ36 [74-93]	0	2903.57	20	2545710	2.27812e+06	2.82444e+06	3.48393e+06	3.98944e+06	3.67943e+06		3	968.53	7.263e-07	5.6
[R].LEDLLQDSMDEKEQLIQSK.[S]	2xTMT6plex [K12; K19]; 1xTMT6plex [N-Term]	1	1	1	W5QFK2	W5QFK2 [787-805]	1	2949.61	19	535882	504285	601917	654377	729505	697868		3	983.864	2.88e-07	3.53
[K].QASVFSFGLGAQAASK.[A]	1xTMT6plex [K16]; 1xTMT6plex [N-Term]	1	1	2	W5QCP9	W5QCP9 [372-387]	0	2027.13	16	2082241	2.23151e+06	2.13802e+06	2.95672e+06	3.23478e+06	2897870		2	1014.06	2.351e-10	6.17
[R].KHPDADSLYVEEVDVGETAPR.[T]	1xTMT6plex [K1]; 1xTMT6plex [N-Term]	1	2	2	W5PH60	W5PH60 [178-198]	1	2785.44	21	121213	89443.2	124718	130957	145561	125244		3	929.148	3.138e-06	4.13
[R].ELVEPLTPSGEAPNQALLR.[I]	1xTMT6plex [N-Term]	1	1	2	W5PWC5	W5PWC5 [634-652]	0	2263.25	19	386557	312231	449564	419410	491614	417928		3	755.088	7.918e-05	4.43
[R].ELVEPLTPSGEAPNQALLR.[I]	1xDeamidated [N/Q]; 1xTMT6plex [N-Term]	1	1	3	W5PWC5	W5PWC5 [634-652]	0	2264.23	19	887424	814382	1.02215e+06	1.07062e+06	1.05855e+06	1.00016e+06		2	1132.63	4.423e-05	2.93
[K].EIVFANSMGK.[G]	1xTMT6plex [K10]; 1xTMT6plex [N-Term]	1	1	3	W5QE21	W5QE21 [177-186]	0	1553.88	10	7.67798e+06	6.96268e+06	8.51395e+06	9.25558e+06	1.07964e+07	10181237		2	777.442	6.917e-05	3.16
[R].QASPNIVIALAGNK.[A]	1xTMT6plex [K14]; 1xTMT6plex [N-Term]	1	1	4	W5QBQ8	W5QBQ8 [122-135]	0	1854.12	14	5.50362e+06	5.43944e+06	6.69853e+06	9.88574e+06	1.10311e+07	9.36007e+06		2	927.556	5.045e-06	5.02
[R].QASNMAIVDVK.[M]	1xDeamidated [N4]; 1xTMT6plex [K11]; 1xTMT6plex [N-Term]	1	1	2	W5NSA6	W5NSA6 [1378-1388]	0	1634.92	11	2.95338e+06	2.78711e+06	3.1171e+06	5.26793e+06	6071547	5.07388e+06		2	817.966	2.858e-05	2.48
[R].QASNMAIVDVK.[M]	1xTMT6plex [K11]; 1xTMT6plex [N-Term]	1	1	3	W5NSA6	W5NSA6 [1378-1388]	0	1633.93	11	1.9651e+06	1.67654e+06	2.20181e+06	3.96569e+06	4.10426e+06	3.16544e+06		2	817.464	6.038e-06	4.14
[R].EIVHIQAGQCGNQIGAK.[FV]	1xCarbamidomethyl [C10]; 1xTMT6plex [K17]; 1xTMT6plex [N-Term]	3	4	11	W5Q039; W5PPT6; D0VWY9	W5Q039 [3-19]; W5PPT6 [3-19]; D0VWY9 [3-19]	0	2281.25	17	1.64812e+07	1.63555e+07	2.00327e+07	1.67968e+07	1.91131e+07	1.7112e+07	Shared	2	1141.12	1.69e-09	5.1
[R].EIVHIQAGQCGNQIGAK.[FV]	1xCarbamidomethyl [C10]; 1xDeamidated [N/Q]; 1xTMT6plex [K17]; 1xTMT6plex [N-Term]	3	4	9	W5Q039; W5PPT6; D0VWY9	W5Q039 [3-19]; W5PPT6 [3-19]; D0VWY9 [3-19]	0	2282.23	17	1.62374e+07	1.49828e+07	1.79244e+07	1.65741e+07	1.93711e+07	1.80465e+07	Shared	3	761.414	2.931e-06	4.59
[R].LEDLLQDSMDEK.[E]	1xTMT6plex [K12]; 1xTMT6plex [N-Term]	1	1	2	W5QFK2	W5QFK2 [787-798]	0	1893.99	12	515703	520344	567169	815896	847341	805211		2	947.496	2.181e-06	3.43
[R].EIVLADVIDNDSWR.[L]	1xTMT6plex [N-Term]	1	2	2	W5P228	W5P228 [200-213]	0	1873.99	14	421437	319802	505650	387268	511167	484247		2	937.496	7.237e-08	4.53
[K].KHPDASVNFSEFSK.[K]	2xTMT6plex [K1; K14]; 1xTMT6plex [N-Term]	2	4	7	W5Q6J0; W5P5Q1	W5Q6J0 [30-43]; W5P5Q1 [23-36]	1	2280.26	14	1.5918e+07	1.6388e+07	1.78262e+07	1.63912e+07	1.96032e+07	1.64896e+07	Shared	2	1140.62	1.562e-06	3.72
[K].QALEQYEGVK.[K]	1xTMT6plex [K10]; 1xTMT6plex [N-Term]	1	1	1	W5PRE5	W5PRE5 [527-536]	0	1622.92	10	1240245	1.14116e+06	1.45547e+06	1413999	1.66722e+06	1.3961e+06		2	811.956	5.692e-05	4.16
[K].ELWFSDDPNVTK.[T]	1xTMT6plex [K12]; 1xTMT6plex [N-Term]	1	2	2	W5Q1F6	W5Q1F6 [178-189]	0	1909.01	12	1.16902e+06	1.00122e+06	1.27078e+06	1.31903e+06	1.45307e+06	1.37192e+06		2	955.006	8.608e-05	3.03
[K].QALEGLGDLK.[L]	1xTMT6plex [K10]; 1xTMT6plex [N-Term]	1	2	1	W5QAU0	W5QAU0 [294-303]	0	1501.9	10	1.63522e+06	1.46453e+06	1.84331e+06	1.75202e+06	2.14245e+06	1.88547e+06		2	751.447	6.062e-05	3.99
[R].QAEEEKLPLPELVR.[A]	1xTMT6plex [K6]; 1xTMT6plex [N-Term]	1	1	6	W5P689	W5P689 [511-524]	1	2109.23	14	1.10812e+07	9.56834e+06	1.32336e+07	1.19922e+07	1.45258e+07	1.27048e+07		3	703.747	5.031e-06	4.03
[R].QAEEAEEQSNVNLSK.[F]	1xTMT6plex [K15]; 1xTMT6plex [N-Term]	1	1	3	W5PPG6	W5PPG6 [1883-1897]	0	2134.1	15	340232	297188	688826	384392	400514	430937		3	712.036	7.361e-05	2.84
[K].KHLEINPDHSIIETLR.[Q]	1xDeamidated [N6]; 1xTMT6plex [K1]; 1xTMT6plex [N-Term]	1	2	4	A8DR93	A8DR93 [633-648]	1	2374.35	16	2.90155e+06	2.92095e+06	3.61849e+06	3.9846e+06	5.61881e+06	4.70741e+06		3	792.119	0.0001207	3.09
[R].QAEEAEEQSNTNLSK.[F]	1xTMT6plex [K15]; 1xTMT6plex [N-Term]	1	1	8	W5PT09	W5PT09 [1878-1892]	0	2136.08	15	3.24364e+06	2.14575e+06	3.49412e+06	1.76805e+06	1.80133e+06	1.94029e+06		3	712.697	0.0001023	2.24
[K].KHLEINPDHSIIETLR.[Q]	1xTMT6plex [K1]; 1xTMT6plex [N-Term]	1	2	8	A8DR93	A8DR93 [633-648]	1	2373.37	16	6.95803e+06	6.64669e+06	8.22067e+06	9.34298e+06	1.26267e+07	1.15107e+07		3	791.787	7.216e-09	4.87
[K].EMECAGTDDGSIDACK.[G]	2xCarbamidomethyl [C4; C15]; 1xTMT6plex [K16]; 1xTMT6plex [N-Term]	1	2	3	W5P5I3	W5P5I3 [542-557]	0	2216.99	16	366483	306818	418882	479000	541871	530940		3	739.664	2.511e-05	2.94
[R].QAEEAEEQANTNLSK.[F]	1xTMT6plex [K15]; 1xTMT6plex [N-Term]	1	2	4	W5QDF3	W5QDF3 [1881-1895]	0	2120.09	15	414348	299465	773951	391929	605237	374794		3	707.366	1.224e-06	3.96
[R].LEDLVCDVVDR.[V]	1xCarbamidomethyl [C6]; 1xTMT6plex [N-Term]	1	1	1	W5P5C4	W5P5C4 [364-374]	0	1561.81	11	551160	332382	521010	469591	542148	467633		2	781.406	1.281e-05	2.89
[K].KHLEINPDHPIVETLR.[Q]	1xTMT6plex [K1]; 1xTMT6plex [N-Term]	1	1	14	W5PHW0	W5PHW0 [624-639]	1	2369.37	16	3.156e+07	3.19847e+07	3.80247e+07	3.10077e+07	4.2555e+07	4.00755e+07		3	790.456	2.354e-07	4.77
[K].IEDMAMMTHLHEPAVLYNLK.[E]	1xTMT6plex [K20]; 1xTMT6plex [N-Term]	2	2	1	W5PPG6; W5PT09	W5PPG6 [88-107]; W5PT09 [88-107]	0	2814.48	20	806969	522349	790819	605660	603271	597453	Shared	4	704.369	3.707e-05	4.88
[K].QADLEKDELAEELASSVSGR.[N]	1xTMT6plex [K6]; 1xTMT6plex [N-Term]	1	2	3	W5PGT5	W5PGT5 [1715-1734]	1	2605.37	20	1.96788e+06	2.19323e+06	2.01775e+06	1.25852e+06	1.36792e+06	1.3319e+06		3	869.131	1.345e-05	3.36
[K].EMDVSVPELEGDLK.[G]	1xTMT6plex [K14]; 1xTMT6plex [N-Term]	1	1	6	W5Q038	W5Q038 [1795-1808]	0	2019.07	14	1.70189e+06	1.86087e+06	1.81467e+06	2.58145e+06	2.95755e+06	2.213e+06		2	1010.04	2.612e-07	3.55
[R].QADEVTEIMLNNFDK.[V]	1xTMT6plex [K15]; 1xTMT6plex [N-Term]	1	1	1	W5QH66	W5QH66 [12-26]	0	2225.15	15	461888	433690	567698	544599	611762	559977		3	742.387	4.291e-05	3.96
[R].KHEWEAHNK.[K]	2xTMT6plex [K1; K9]; 1xTMT6plex [N-Term]	1	1	2	W5NZX9	W5NZX9 [2206-2214]	1	1866.06	9	2.23075e+06	2.39473e+06	2.41331e+06	1.76081e+06	2.19496e+06	2.05705e+06		3	622.687	1.076e-05	2.98
[R].QACNTVHGFTTEVIQER.[R]	1xCarbamidomethyl [C3]; 1xTMT6plex [N-Term]	1	1	2	W5NXS1	W5NXS1 [228-244]	0	2219.11	17	1.08026e+06	1.04285e+06	1.18291e+06	1.21707e+06	2.65815e+06	2.43566e+06		3	740.368	0.0001163	4.15
[K].EMETVDFKDK.[L]	2xTMT6plex [K8; K10]; 1xTMT6plex [N-Term]	1	1	6	W5P8T8	W5P8T8 [127-136]	1	1929.06	10	3.17084e+07	2.80096e+07	3.40775e+07	4.47997e+07	5.31022e+07	5.01133e+07		3	643.688	0.0001127	3.72
[K].EMETVDFKDKLEETK.[G]	3xTMT6plex [K8; K10; K15]; 1xTMT6plex [N-Term]	1	1	2	W5P8T8	W5P8T8 [127-141]	2	2758.54	15	3.92379e+06	2.98188e+06	4532908	4.08632e+06	5.00403e+06	4.95738e+06		3	920.182	2.067e-07	2.6
[K].QAAYADTYLVSEANGDVK.[T]	1xDeamidated [N14]; 1xTMT6plex [K18]; 1xTMT6plex [N-Term]	1	1	1	W5P6V2	W5P6V2 [393-410]	0	2374.22	18	240146	196696	254712	247083	302342	278769		3	792.074	1.069e-05	3.17
[K].EMFPFEAATPTGISASCR.[R]	1xCarbamidomethyl [C17]; 1xTMT6plex [N-Term]	1	1	7	W5PTN4	W5PTN4 [259-276]	0	2201.06	18	8588134	8.16522e+06	9.77576e+06	9.27991e+06	1.02466e+07	9.86225e+06		2	1101.02	4.291e-08	4.33
[K].EMFPFEAATPTGISASCR.[R]	1xCarbamidomethyl [C17]; 1xOxidation [M2]; 1xTMT6plex [N-Term]	1	1	1	W5PTN4	W5PTN4 [259-276]	0	2217.05	18	401995	381797	634571	398871	432492	421263		2	1109.02	4.256e-05	2.67
[R].QAASSLQQASLK.[L]	1xTMT6plex [K12]; 1xTMT6plex [N-Term]	1	1	4	W5Q4W8	W5Q4W8 [635-646]	0	1689.99	12	8.70868e+06	7.74204e+06	9.16239e+06	7.89049e+06	9.95837e+06	8.64168e+06		2	845.494	1.312e-06	4.71
[R].QAAPCVLFFDELDSIAK.[A]	1xCarbamidomethyl [C5]; 1xTMT6plex [K17]; 1xTMT6plex [N-Term]	1	1	3	W5PRJ4	W5PRJ4 [568-584]	0	2382.28	17	1.2098e+07	1.12269e+07	1.39201e+07	1.29784e+07	1.52593e+07	1.33698e+07		2	1191.63	1.017e-10	6.26
[R].QAALQVAEDFITR.[M]	1xTMT6plex [N-Term]	1	1	9	W5QH35	W5QH35 [355-367]	0	1690.93	13	2.22082e+07	2.11968e+07	2.71371e+07	2.68214e+07	3.14934e+07	2.8138e+07		2	845.964	1.15e-07	3.68
[R].EMGLPPETEAVLDKDMAAPPETEVIVPVR.[D]	1xTMT6plex [K14]; 1xTMT6plex [N-Term]	1	1	3	W5NXB5	W5NXB5 [425-453]	1	3591.91	29	801725	766375	950290	1.00415e+06	1.08146e+06	898174		3	1197.97	2.402e-08	4.57
[K].QADEEFQILANSWR.[Y]	1xTMT6plex [N-Term]	1	2	1	W5QAQ0	W5QAQ0 [92-105]	0	1935.98	14	1.24037e+06	1.13761e+06	1.45059e+06	1.40861e+06	1.39251e+06	1.50514e+06		2	968.487	1.579e-06	3.63
[K].ELTYQTEEDR.[K]	1xTMT6plex [N-Term]	5	6	4	W5PPG6; W5PT09; W5PBN5; W5QDF3; W5PIU1	W5PPG6 [1851-1860]; W5PT09 [1846-1855]; W5PBN5 [1848-1857]; W5QDF3 [1849-1858]; W5PIU1 [1862-1871]	0	1512.74	10	1.02307e+06	479935	1.3565e+06	397778	442329	450231	Shared	2	756.871	2.771e-05	3.23
[R].QAEGVLSSQEYVLSHTEMPGTLQAADATIK.[K]	1xTMT6plex [K30]; 1xTMT6plex [N-Term]	1	1	1	W5PDN3	W5PDN3 [1162-1191]	0	3632.89	30	397969	326725	407570	459213	462762	469209		4	908.973	4.235e-07	5.19
[R].QAEIENPLEDPVTGDYVHK.[S]	1xTMT6plex [K19]; 1xTMT6plex [N-Term]	1	2	2	W5NV06	W5NV06 [199-217]	0	2612.36	19	503486	412885	555708	518889	569961	540410		3	871.458	8.79e-06	3.6
[R].KHNMCGETEEEK.[I]	1xCarbamidomethyl [C5]; 2xTMT6plex [K1; K12]; 1xTMT6plex [N-Term]	2	2	4	W5QDE3; W5QDB4	W5QDE3 [83-94]; W5QDB4 [86-97]	1	2179.11	12	6.27937e+06	6.50335e+06	7.58101e+06	1.06545e+07	1.20295e+07	10281224	Shared	3	727.036	8.836e-06	3.62
[R].QAHLCVLASNCDEPMYVK.[L]	2xCarbamidomethyl [C5; C11]; 1xTMT6plex [K18]; 1xTMT6plex [N-Term]	1	3	3	W5PYQ7	W5PYQ7 [46-63]	0	2593.3	18	4.52877e+06	4.53832e+06	4.69428e+06	5.53863e+06	5.97591e+06	5.52905e+06		3	865.1	2.493e-06	2.95
[R].EIYDQFGEEGLK.[G]	1xTMT6plex [K12]; 1xTMT6plex [N-Term]	1	1	3	W5PV03	W5PV03 [69-80]	0	1885.99	12	874909	833879	910731	830571	905070	866605		2	943.503	1.579e-07	2.88
[K].QAGVFEPTIVK.[V]	1xTMT6plex [K11]; 1xTMT6plex [N-Term]	1	1	1	W5P375	W5P375 [502-512]	0	1646.99	11	224253	218916	283661	277930	281240	316410		2	823.994	1.613e-05	3.57
[K].QAGPASVPLKSEEEFEK.[F]	2xTMT6plex [K10; K17]; 1xTMT6plex [N-Term]	1	2	8	C6JUQ0	C6JUQ0 [131-147]	1	2533.41	17	2.54907e+07	2.13544e+07	3.0214e+07	2.20998e+07	2.80843e+07	2.53851e+07		2	1267.2	2.124e-07	4.44
[R].ELYLEDAPLELK.[I]	1xTMT6plex [K12]; 1xTMT6plex [N-Term]	1	1	1	W5NV79	W5NV79 [71-82]	0	1891.08	12	970098	851354	1.0448e+06	1.0482e+06	1.12177e+06	1.07047e+06		2	946.043	4.742e-05	3.21
[R].ELYLSHNGIEAIEGLDNNNK.[L]	1xDeamidated [N7]; 1xTMT6plex [K20]; 1xTMT6plex [N-Term]	1	1	2	W5Q9D0	W5Q9D0 [238-257]	0	2702.4	20	470242	421702	554851	558884	591703	621918		3	901.469	1.117e-05	4.44
[K].EIYLVEPLAFEGSPEQK.[A]	1xTMT6plex [K17]; 1xTMT6plex [N-Term]	1	2	1	W5QC89	W5QC89 [433-449]	0	2407.32	17	575074	570056	701700	722253	765507	707945		3	803.106	7.935e-06	3.62
[K].EIYLVEPLAFEGSPEQK.[A]	1xDeamidated [Q16]; 1xTMT6plex [K17]; 1xTMT6plex [N-Term]	1	2	1	W5QC89	W5QC89 [433-449]	0	2408.3	17	294625	241796	321314	358442	316074	347702		2	1204.66	1.006e-05	3.22
[K].ELYSSASEPNDVFFK.[L]	1xTMT6plex [K15]; 1xTMT6plex [N-Term]	1	1	3	W5QCP9	W5QCP9 [2761-2775]	0	2191.13	15	3.64874e+06	3.3507e+06	3.74653e+06	4.02405e+06	4.30291e+06	3.97328e+06		2	1096.06	1.523e-05	4.08
[R].QAGEVTYADAHK.[EG]	1xTMT6plex [K12]; 1xTMT6plex [N-Term]	2	2	3	W5NYS1; W5NWQ4	W5NYS1 [130-141]; W5NWQ4 [112-123]	0	1747.94	12	6.98412e+06	6.73803e+06	7.93217e+06	6.84271e+06	7.81344e+06	7.20835e+06	Shared	3	583.318	6.18e-05	3.56
[R].EMDQTMAANAQK.[N]	1xTMT6plex [K12]; 1xTMT6plex [N-Term]	1	1	2	W5P075	W5P075 [112-123]	0	1795.91	12	1.62774e+06	1.56943e+06	1.74403e+06	1.66614e+06	2072007	1.65163e+06		2	898.452	6.28e-07	5.18
[K].QAFTQQIEELKR.[Q]	1xTMT6plex [K11]; 1xTMT6plex [N-Term]	4	4	3	W5PPG6; W5PWV8; W5PT09; W5PIU1	W5PPG6 [1306-1317]; W5PWV8 [1301-1312]; W5PT09 [1303-1314]; W5PIU1 [1317-1328]	1	1949.12	12	3.39511e+07	2.71424e+07	49214241	2.46843e+07	2.90856e+07	2.6613e+07	Shared	2	975.057	3.905e-06	3.02
[K].QAFTQQIEELK.[R]	1xTMT6plex [K11]; 1xTMT6plex [N-Term]	4	4	1	W5PPG6; W5PWV8; W5PT09; W5PIU1	W5PPG6 [1306-1316]; W5PWV8 [1301-1311]; W5PT09 [1303-1313]; W5PIU1 [1317-1327]	0	1793.02	11	7.98922e+06	5408075	11473143	5.37202e+06	5978113	4912181	Shared	2	897.011	4.362e-05	2.75
[K].QAFTDVATGSLGQGLGAACGMAYTGK.[Y]	1xCarbamidomethyl [C19]; 1xTMT6plex [K26]; 1xTMT6plex [N-Term]	1	1	2	W5Q5G8	W5Q5G8 [115-140]	0	2990.51	26	1.47114e+06	1.3648e+06	1.63981e+06	1.94797e+06	2.20255e+06	1.98212e+06		3	997.503	1.732e-09	7.99
[K].IEDLSQQAQLAAAEK.[F]	1xTMT6plex [K15]; 1xTMT6plex [N-Term]	1	4	4	W5PEL1	W5PEL1 [1794-1808]	0	2073.16	15	9.9305e+06	9.55077e+06	1.18012e+07	9.8509e+06	1.24472e+07	1.11064e+07		2	1037.08	2.226e-08	5.5
[R].KHNMCGDTEEER.[I]	1xCarbamidomethyl [C5]; 1xTMT6plex [K1]; 1xTMT6plex [N-Term]	1	2	6	W5QDF4	W5QDF4 [92-103]	1	1963.94	12	5.86922e+06	5.54714e+06	6.42929e+06	8.01501e+06	9.15315e+06	8.42534e+06		3	655.316	7.902e-06	4.28
[K].QAEVANQETK.[E]	1xTMT6plex [K10]; 1xTMT6plex [N-Term]	1	4	10	W5QET4	W5QET4 [63-72]	0	1575.87	10	9.79034e+06	1.16569e+07	1.07387e+07	1.07749e+07	1.23913e+07	9800440		2	788.44	2.905e-05	3.3
[K].QAESASDAAK.[K]	1xTMT6plex [K10]; 1xTMT6plex [N-Term]	1	1	7	W5PB89	W5PB89 [159-168]	0	1435.78	10	7.2867e+06	7.30109e+06	7.97672e+06	7.58436e+06	9.60294e+06	8.47068e+06		2	718.393	3.099e-05	3.39
[K].EMAVNDLTEASIPR.[W]	1xTMT6plex [N-Term]	1	2	2	W5PQM4	W5PQM4 [80-93]	0	1774.92	14	530175	545694	561530	527201	636006	627909		2	887.963	1.043e-05	4.33
[R].QAENINQAAK.[K]	1xTMT6plex [K10]; 1xTMT6plex [N-Term]	1	1	1	W5P6Z7	W5P6Z7 [141-150]	0	1544.88	10	1.20076e+06	1.20055e+06	1.26843e+06	1.34259e+06	1.49651e+06	1.3799e+06		2	772.942	0.0001084	3.01
[R].EMDDPSVGPK.[I]	1xTMT6plex [K10]; 1xTMT6plex [N-Term]	2	2	5	W5NVP5; W5NVP7	W5NVP5 [240-249]; W5NVP7 [99-108]	0	1532.8	10	8.09805e+06	5.74146e+06	9.65479e+06	5.7284e+06	6.80577e+06	5.72863e+06	Shared	2	766.907	8.314e-05	2.76
[R].QAEMLDDLMK.[K]	1xTMT6plex [K10]; 1xTMT6plex [N-Term]	1	1	3	W5QI77	W5QI77 [102-111]	0	1651.88	10	1.34117e+07	1.21555e+07	1.47717e+07	1.54379e+07	1.92548e+07	1.73412e+07		2	826.442	3.314e-05	4.19
[K].QAEILQESR.[M]	1xTMT6plex [N-Term]	1	1	13	W5Q6J7	W5Q6J7 [38-46]	0	1302.72	9	1.08846e+07	1.04371e+07	1.22767e+07	1.15808e+07	1.46339e+07	1.11023e+07		2	651.871	0.0001191	3.23
[R].EMAEAFAGEIPR.[I]	1xTMT6plex [N-Term]	1	1	9	W5P369	W5P369 [119-130]	0	1549.79	12	5.27888e+06	5.04416e+06	5.47785e+06	6.12882e+06	7.0327e+06	6.55431e+06		2	775.394	9.877e-07	3.85
[K].ELLSNVDQDVHELEK.[G]	1xDeamidated [Q8]; 1xTMT6plex [K15]; 1xTMT6plex [N-Term]	1	2	1	W5P4W2	W5P4W2 [424-438]	0	2227.19	15	146970	138759	170932	169889	176068	148446		3	743.072	7.731e-05	2.73
[K].NLTEEMAGLDEVIAK.[L]	1xTMT6plex [K15]; 1xTMT6plex [N-Term]	1	1	6	W5PBN5	W5PBN5 [984-998]	0	2091.14	15	1.14776e+07	2.23572e+06	1.17373e+06	1.01522e+06	1.08259e+06	1.09704e+06		2	1046.07	1.263e-09	5.04
[K].NLTEEMAGLDETIAK.[L]	1xTMT6plex [K15]; 1xTMT6plex [N-Term]	2	2	3	W5PPG6; W5PT09	W5PPG6 [981-995]; W5PT09 [979-993]	0	2093.12	15	3.68581e+06	1.45105e+06	7.22938e+06	921453	745313	1.03821e+06	Shared	2	1047.06	2.013e-06	2.86
[K].NCVVELNFGQK.[E]	1xCarbamidomethyl [C2]; 1xTMT6plex [K11]; 1xTMT6plex [N-Term]	1	1	3	W5Q5S5	W5Q5S5 [408-418]	0	1765.97	11	5912781	5.85016e+06	6.35481e+06	6.53305e+06	8.0933e+06	7606576		2	883.482	8.015e-05	3.74
[K].NCVDINECVLNSLLCDNGQCR.[N]	4xCarbamidomethyl [C2; C8; C15; C20]; 1xDeamidated [N]; 1xTMT6plex [N-Term]	1	1	7	W5QIN8	W5QIN8 [762-782]	0	2783.24	21	1.92169e+07	1.90284e+07	2.17621e+07	1.6008e+07	1.92713e+07	1.50831e+07		2	1392.12	2.098e-10	5.51
[R].NCVDIDECLVNR.[L]	2xCarbamidomethyl [C2; C8]; 1xTMT6plex [N-Term]	1	1	4	W5Q6X0	W5Q6X0 [807-818]	0	1735.83	12	618684	682068	610881	260840	262839	230143		2	868.417	2.176e-05	2.86
[K].KFEEFQTDMAAHEER.[V]	1xDeamidated [Q6]; 1xOxidation [M9]; 1xTMT6plex [K1]; 1xTMT6plex [N-Term]	1	1	2	W5PJ75	W5PJ75 [190-204]	1	2343.13	15	847640	900464	1.22088e+06	940638	909424	923905		4	586.541	0.0001114	2.77
[K].NCTCGLAEELEKEK.[S]	2xCarbamidomethyl [C2; C4]; 2xTMT6plex [K12; K14]; 1xTMT6plex [N-Term]	1	1	1	W5NPU7	W5NPU7 [294-307]	1	2368.25	14	1.21318e+06	1.04574e+06	1.36074e+06	1.04993e+06	1.27163e+06	962750		3	790.086	4.45e-05	2.47
[K].EVSQPNWTPPPEVTLVLTK.[D]	1xTMT6plex [K19]; 1xTMT6plex [N-Term]	1	1	6	W5QC35	W5QC35 [166-184]	0	2593.46	19	1.03603e+07	9.42749e+06	1.19312e+07	8.55197e+06	1.02773e+07	8.34802e+06		2	1297.23	1.879e-05	4.06
[K].NCTCGLAEELEK.[E]	2xCarbamidomethyl [C2; C4]; 1xTMT6plex [K12]; 1xTMT6plex [N-Term]	1	1	2	W5NPU7	W5NPU7 [294-305]	0	1881.95	12	495335	454253	537661	451589	520337	419345		2	941.479	5.96e-06	2.48
[K].KFEEFQTDMAAHEER.[V]	1xDeamidated [Q6]; 1xTMT6plex [K1]; 1xTMT6plex [N-Term]	1	1	1	W5PJ75	W5PJ75 [190-204]	1	2327.14	15	564964	440308	795677	468136	585101	547028		4	582.541	3.4e-05	3.5
[K].NCSETQYESK.[V]	1xCarbamidomethyl [C2]; 1xTMT6plex [K10]; 1xTMT6plex [N-Term]	1	1	10	W5PWD6	W5PWD6 [89-98]	0	1703.83	10	4.63605e+07	4.70042e+07	4.46435e+07	4.97554e+07	5.86495e+07	4.34431e+07		2	852.418	3.093e-05	2.4
[K].NCPHIVVGTPGR.[I]	1xCarbamidomethyl [C2]; 1xTMT6plex [N-Term]	1	1	5	W5PG71	W5PG71 [172-183]	0	1535.83	12	6.02693e+06	5.99844e+06	6.61761e+06	6.56743e+06	7.84206e+06	6.204e+06		2	768.417	9.575e-05	3.2
[K].EVSSSTAMIQTSK.[T]	1xTMT6plex [K13]; 1xTMT6plex [N-Term]	1	1	1	W5Q665	W5Q665 [306-318]	0	1826.99	13	635585	1.28676e+06	693711	335954	388064	311337		2	914.002	0.0001007	2.62
[K].NCMDIDECQR.[D]	2xCarbamidomethyl [C2; C8]; 1xTMT6plex [N-Term]	1	1	17	W5QIN8	W5QIN8 [1112-1121]	0	1569.67	10	7.69847e+06	9.07597e+06	6.78369e+06	8.63673e+06	9.43319e+06	8.44998e+06		2	785.336	4.631e-06	2.64
[K].EVTDEDLNDYFK.[S]	1xTMT6plex [K12]; 1xTMT6plex [N-Term]	1	1	5	W5Q437	W5Q437 [366-377]	0	1945.98	12	1.63326e+06	1.43485e+06	1733110	1.66418e+06	1.77724e+06	1.73338e+06		2	973.502	2.418e-06	2.79
[K].NCIVLIDSTPYR.[Q]	1xCarbamidomethyl [C2]; 1xTMT6plex [N-Term]	1	2	5	K4P1S8	K4P1S8 [99-110]	0	1679.9	12	1.11932e+07	1.05337e+07	1.20546e+07	1.08162e+07	1.19306e+07	1.11863e+07		2	840.447	3.654e-05	3.64
[K].NCLTNFHGMDLTR.[D]	1xCarbamidomethyl [C2]; 1xDeamidated [N]; 1xTMT6plex [N-Term]	2	5	2	W5QG75; W5Q8V4	W5QG75 [95-107]; W5Q8V4 [95-107]	0	1808.86	13	2.87837e+06	2.61604e+06	3.02867e+06	3.09037e+06	3.51471e+06	3.13894e+06	Shared	3	603.622	2.57e-05	3.76
[K].EVTDMNLNVINEGGIDK.[L]	1xTMT6plex [K17]; 1xTMT6plex [N-Term]	1	1	2	W5PQR0	W5PQR0 [366-382]	0	2319.23	17	1.65806e+06	1.66205e+06	1.89989e+06	2.06447e+06	2.28015e+06	2.13728e+06		2	1160.11	2.163e-08	4.51
[K].EVTDMNLNVINEGGIDK.[L]	1xDeamidated [N8]; 1xTMT6plex [K17]; 1xTMT6plex [N-Term]	1	1	2	W5PQR0	W5PQR0 [366-382]	0	2320.21	17	2246387	2.12754e+06	2.50918e+06	3.0458e+06	3.63568e+06	3.39519e+06		3	774.082	5.705e-05	4.54
[K].EVTDMNLNVINEGGIDK.[L]	1xOxidation [M5]; 1xTMT6plex [K17]; 1xTMT6plex [N-Term]	1	1	5	W5PQR0	W5PQR0 [366-382]	0	2335.22	17	1.64321e+06	1.34167e+06	2.0958e+06	1.78302e+06	2.19326e+06	1.89863e+06		3	779.076	1.027e-05	2.88
[K].NCLTNFHGMDLTR.[D]	1xCarbamidomethyl [C2]; 1xTMT6plex [N-Term]	2	5	9	W5QG75; W5Q8V4	W5QG75 [95-107]; W5Q8V4 [95-107]	0	1807.88	13	2.13812e+07	2.10449e+07	2.42032e+07	2.27159e+07	2.80914e+07	2.51995e+07	Shared	3	603.294	2.052e-07	3.99
[K].NCLQVLSQPTPSSAGEAELAADQQER.[E]	1xCarbamidomethyl [C2]; 2xDeamidated [Q8; Q23]; 1xTMT6plex [N-Term]	1	1	1	W5NU44	W5NU44 [88-113]	0	3030.45	26	27715.6	23267.5	43901.9	33326.5	42628.9	41765.2		3	1010.83	2.443e-05	2.48
[K].EVTETVTNTVTNAVTHAAEGLGK.[L]	1xTMT6plex [K23]; 1xTMT6plex [N-Term]	1	1	5	W5NRH4	W5NRH4 [70-92]	0	2800.51	23	5.40353e+06	4.77514e+06	6.10995e+06	5.24512e+06	6.44136e+06	4.49563e+06		3	934.167	9.642e-11	7.91
[K].EVTETVTNTVTNAVTHAAEGLGK.[L]	1xDeamidated [N]; 1xTMT6plex [K23]; 1xTMT6plex [N-Term]	1	1	2	W5NRH4	W5NRH4 [70-92]	0	2801.49	23	962853	933396	1.14674e+06	1.04067e+06	1.13494e+06	889264		3	934.5	1.055e-07	5.24
[K].EVTETVTNTVTNAVTHAAEGLGK.[L]	2xDeamidated [N8; N12]; 1xTMT6plex [K23]; 1xTMT6plex [N-Term]	1	1	3	W5NRH4	W5NRH4 [70-92]	0	2802.48	23	1.01311e+06	880297	1.21381e+06	1.31615e+06	1.29893e+06	1.09814e+06		3	934.837	7.339e-08	4.05
[R].NDANPETHAFVTSPEIVTALAIAGTLK.[F]	1xDeamidated [N4]; 1xTMT6plex [K27]; 1xTMT6plex [N-Term]	1	1	2	W5QAA9	W5QAA9 [480-506]	0	3239.76	27	1.37143e+06	1.337e+06	1.47968e+06	1.55075e+06	1.91659e+06	1.7988e+06		3	1080.59	7.517e-07	4.15
[R].NDAPTPGTSTTPGLR.[S]	1xTMT6plex [N-Term]	1	1	2	W5QBH6	W5QBH6 [386-400]	0	1713.9	15	477088	454637	482895	422227	541548	500950		2	857.448	1.848e-05	2.58
[R].NDDDSSEAMNDILAQVATNTETSK.[N]	1xTMT6plex [K24]; 1xTMT6plex [N-Term]	1	2	3	W5P100	W5P100 [279-302]	0	3027.45	24	211256	202211	247328	291966	291253	320938		3	1009.82	2.404e-08	5.63
[K].KFESEILEAISQNPVVIIR.[G]	1xTMT6plex [K1]; 1xTMT6plex [N-Term]	1	1	1	W5QCQ4	W5QCQ4 [391-409]	1	2643.55	19	930370	799461	1.02371e+06	974989	1.11817e+06	1.06025e+06		3	881.849	9.061e-09	6.21
[R].NDLDQAEDKADVLNK.[E]	2xTMT6plex [K9; K15]; 1xTMT6plex [N-Term]	1	1	1	W5PUN9	W5PUN9 [844-858]	1	2375.3	15	1.05442e+06	895739	1321249	1.03787e+06	1.07672e+06	1.00243e+06		3	792.437	6.704e-05	2.94
[K].EVPIVQTETK.[T]	1xTMT6plex [K10]; 1xTMT6plex [N-Term]	1	2	4	W5PWQ4	W5PWQ4 [934-943]	0	1601.95	10	4.69097e+06	4.72691e+06	5.00841e+06	4.95208e+06	5.92174e+06	4.64645e+06		2	801.475	6.541e-05	3.66
[K].EVPMVVVSPVGAK.[G]	1xTMT6plex [K13]; 1xTMT6plex [N-Term]	1	1	4	W5Q8J3	W5Q8J3 [173-185]	0	1770.06	13	6.22808e+06	5824065	7.40116e+06	6.87874e+06	7.87629e+06	7.36425e+06		2	885.532	1.599e-05	4.41
[R].IEGDETSTEAATR.[L]	1xTMT6plex [N-Term]	1	1	4	W5QHC1	W5QHC1 [99-111]	0	1608.79	13	696163	656189	746700	680690	819706	698383		2	804.9	6.054e-07	3.13
[K].EVQDLFEATGNDR.[L]	1xTMT6plex [N-Term]	1	2	4	W5PS76	W5PS76 [806-818]	0	1722.85	13	759785	645272	852674	787057	975295	864918		2	861.933	1.694e-06	2.65
[K].NDIAINELMK.[R]	1xTMT6plex [K10]; 1xTMT6plex [N-Term]	1	1	5	W5P0D5	W5P0D5 [104-113]	0	1618.92	10	1.90503e+07	1.88403e+07	2.22327e+07	2.17949e+07	2.70956e+07	2.44216e+07		2	809.963	1.821e-05	3.77
[R].EVQGFESATFLGYFK.[S]	1xTMT6plex [K15]; 1xTMT6plex [N-Term]	1	2	9	F2YQ13	F2YQ13 [97-111]	0	2181.16	15	1.39508e+07	1.31589e+07	1.47071e+07	1.80004e+07	1.88287e+07	1.7217e+07		2	1091.08	7.851e-09	6.33
[K].NDKSEEEQSSSSLK.[K]	1xDeamidated [Q/N]; 2xTMT6plex [K3; K14]; 1xTMT6plex [N-Term]	2	2	4	W5PKR1; W5QEI1	W5PKR1 [154-167]; W5QEI1 [227-240]	1	2256.18	14	4.42729e+06	4.35954e+06	4.86667e+06	4.26271e+06	5.03335e+06	4.33556e+06	Shared	3	752.735	8.626e-05	3.46
[R].NDGVLLLQALTR.[S]	1xTMT6plex [N-Term]	1	1	2	W5Q2I7	W5Q2I7 [186-197]	0	1541.92	12	4.8865e+06	4.52429e+06	5.58707e+06	5138244	6167139	5.71789e+06		2	771.461	8.816e-06	2.53
[K].NDGSLMFQQVPMVEIDGMK.[L]	1xTMT6plex [K19]; 1xTMT6plex [N-Term]	1	2	1	B0LXN9	B0LXN9 [46-64]	0	2597.32	19	915656	892202	1007174	1.93732e+06	2260281	2.16875e+06		2	1299.15	5.837e-08	5.1
[R].EVQITEEKPLLPGQTPEVAK.[TE]	2xTMT6plex [K8; K20]; 1xTMT6plex [N-Term]	1	2	4	W5QEL8	W5QEL8 [6-25]	0	2893.69	20	1.80046e+07	15423122	22112468	22962720	27464244	25210285		3	965.228	6.171e-07	6.21
[K].NCLQVLSQPTPSSAGEAELAADQQER.[E]	1xCarbamidomethyl [C2]; 1xTMT6plex [N-Term]	1	1	2	W5NU44	W5NU44 [88-113]	0	3028.48	26	194803	143595	222633	179595	179506	204921		3	1010.16	5.432e-08	5.19
[R].NDGGLLTIDSK.[T]	1xTMT6plex [K11]; 1xTMT6plex [N-Term]	1	2	6	W5P922	W5P922 [430-440]	0	1590.91	11	9.5267e+06	8.97731e+06	1.09159e+07	1.05329e+07	1.22151e+07	1.10665e+07		2	795.953	3.481e-05	3.78
[R].NDGAAILAAVSNIAQK.[I]	1xTMT6plex [K16]; 1xTMT6plex [N-Term]	1	1	3	W5QB34	W5QB34 [484-499]	0	2014.17	16	8.24223e+06	6.83954e+06	9161193	7.8244e+06	8.14478e+06	6.92987e+06		2	1007.58	5.367e-09	5.54
[K].NDFTEEEEAQVR.[K]	1xTMT6plex [N-Term]	1	3	4	B8QGA5	B8QGA5 [143-154]	0	1695.8	12	633747	575630	662704	552099	729504	494898		2	848.398	1.78e-06	3.72
[R].NDFQLIGIQDGYLSLLQDSGEVR.[E]	1xDeamidated [Q9]; 1xTMT6plex [N-Term]	1	2	1	W5PQK7	W5PQK7 [90-112]	0	2810.44	23	789624	659722	887363	736751	793919	731875		2	1405.72	7.445e-09	4.38
[R].NDFQLIGIQDGYLSLLQDSGEVR.[E]	1xTMT6plex [N-Term]	1	2	4	W5PQK7	W5PQK7 [90-112]	0	2809.46	23	2.33683e+06	1.98237e+06	2.64462e+06	2.60304e+06	2.67209e+06	2.47865e+06		2	1405.22	1.214e-10	5.52
[K].NDFEIVLPENAEK.[E]	1xTMT6plex [K13]; 1xTMT6plex [N-Term]	1	2	3	W5PKH2	W5PKH2 [488-500]	0	1976.07	13	882071	928072	984147	1.05622e+06	1.15449e+06	1.04436e+06		2	988.539	0.0001071	2.86
[K].NDFAVESYENR.[E]	1xTMT6plex [N-Term]	1	1	5	W5NZ80	W5NZ80 [99-109]	0	1572.75	11	652004	498481	646755	775190	940815	881632		2	786.878	2.703e-05	3.52
[K].NDECVLEDNSQR.[T]	1xCarbamidomethyl [C4]; 1xTMT6plex [N-Term]	1	1	3	W5QFK2	W5QFK2 [852-863]	0	1707.78	12	272716	291433	334923	363324	404602	371530		2	854.398	1.19e-05	2.09
[K].EVSALDVIEDSK.[L]	1xTMT6plex [K12]; 1xTMT6plex [N-Term]	2	2	1	W5NZ34; W5NZ31	W5NZ34 [1970-1981]; W5NZ31 [1956-1967]	0	1762.98	12	241858	227368	255206	264696	257657	231391	Shared	2	881.994	3.404e-07	3.77
[K].EVSDFIQDSGQIK.[K]	1xTMT6plex [K13]; 1xTMT6plex [N-Term]	1	1	4	W5P5C2	W5P5C2 [55-67]	0	1924.04	13	1.8864e+06	1.79904e+06	2.30585e+06	1.98613e+06	2.24093e+06	2.03861e+06		2	962.519	7.44e-06	3.91
[R].EVSDGIIAPGYENEALK.[I]	1xDeamidated [N13]; 1xTMT6plex [K17]; 1xTMT6plex [N-Term]	1	1	2	W5QDE5	W5QDE5 [336-352]	0	2264.21	17	293437	236136	310536	308414	354099	311702		2	1132.61	3.756e-05	3.11
[R].EVSEAVVDTLESEYLK.[I]	1xTMT6plex [K16]; 1xTMT6plex [N-Term]	1	1	2	W5PEL7	W5PEL7 [89-104]	0	2269.22	16	133249	151739	141644	115617	123639	102698		3	757.08	5.161e-06	3.48
[R].EVQQGEEFER.[R]	1xTMT6plex [N-Term]	1	2	4	C5IJA8	C5IJA8 [98-107]	0	1479.73	10	1.74284e+06	1.37216e+06	2.15907e+06	1.24935e+06	1.49741e+06	1.3011e+06		2	740.368	4.148e-05	2.96
[R].EVPFADLSNMEIGMK.[V]	1xTMT6plex [K15]; 1xTMT6plex [N-Term]	1	2	1	H9CH14	H9CH14 [389-403]	0	2139.12	15	3.17863e+06	3.09175e+06	3373824	2.43083e+06	2.6664e+06	2.48686e+06		2	1070.05	2.699e-08	4.49
[K].KFEEFQTDMAAHEER.[V]	1xTMT6plex [K1]; 1xTMT6plex [N-Term]	1	1	4	W5PJ75	W5PJ75 [190-204]	1	2326.15	15	7.20997e+06	7.67252e+06	7.94443e+06	8.11049e+06	1.00902e+07	8.96382e+06		3	776.052	1.603e-07	4.08
[K].LEGDHQLIQEALVFDNK.[H]	1xTMT6plex [K17]; 1xTMT6plex [N-Term]	1	1	1	W5P0L8	W5P0L8 [697-713]	0	2427.33	17	757322	429192	864156	558528	660452	536524		3	809.777	3.802e-06	5.38
[K].NAQEALQAIETK.[V]	1xTMT6plex [K12]; 1xTMT6plex [N-Term]	1	2	2	W5P005	W5P005 [317-328]	0	1774.01	12	1.48165e+06	1.3721e+06	1.65202e+06	1.66195e+06	1.8574e+06	1.73181e+06		2	887.503	8.006e-06	4.11
[K].EVVPVNVPEAQEEMK.[E]	1xTMT6plex [K15]; 1xTMT6plex [N-Term]	1	1	4	W5PQF8	W5PQF8 [514-528]	0	2156.17	15	1.62463e+06	1.31108e+06	1.80803e+06	1.66934e+06	1.94252e+06	1.66293e+06		3	719.393	0.0001141	3.95
[KR].KFDQLLAEEK.[NAT]	2xTMT6plex [K1; K10]; 1xTMT6plex [N-Term]	4	5	18	W5PGT5; W5NU63; W5PWH2; W5NW47	W5PGT5 [1462-1471]; W5NU63 [1452-1461]; W5PWH2 [1434-1443]; W5NW47 [77-86]	1	1908.14	10	1.70767e+08	1.72378e+08	1.84597e+08	1.55726e+08	1.91961e+08	1.67547e+08	Shared	3	636.715	2.262e-06	4.11
[K].NAQAMADALLER.[G]	1xTMT6plex [N-Term]	1	1	7	W5PB83	W5PB83 [196-207]	0	1531.81	12	3.78939e+06	3.64733e+06	4.43497e+06	4.61783e+06	5.42444e+06	5.1082e+06		2	766.407	3.46e-07	3.13
[K].NAQAIEDMVGYAQETQHEK.[I]	1xDeamidated [Q13]; 1xTMT6plex [K19]; 1xTMT6plex [N-Term]	1	1	1	W5QHM6	W5QHM6 [525-543]	0	2621.29	19	823307	711888	954272	929965	1018369	897139		3	874.433	2.119e-07	4.4
[K].NAQAIEDMVGYAQETQHEK.[I]	1xTMT6plex [K19]; 1xTMT6plex [N-Term]	1	1	3	W5QHM6	W5QHM6 [525-543]	0	2620.31	19	1.12294e+06	1.02063e+06	1.29147e+06	1.2898e+06	1.37843e+06	1.27799e+06		4	655.83	4.392e-06	4.43
[K].EVVQEILQFQEDPQTK.[E]	1xTMT6plex [K16]; 1xTMT6plex [N-Term]	1	1	5	W5P352	W5P352 [1261-1276]	0	2389.3	16	561709	580241	672445	720646	736246	754619		3	797.1	1.422e-05	4.51
[K].EVVQEILQFQEDPQTK.[E]	1xDeamidated [Q10]; 1xTMT6plex [K16]; 1xTMT6plex [N-Term]	1	1	2	W5P352	W5P352 [1261-1276]	0	2390.29	16	1.00886e+06	1.04351e+06	1.20299e+06	1.21009e+06	1.38244e+06	1.12944e+06		3	797.433	0.0001199	4.83
[R].KFDEVLVNHFCEEFGK.[K]	1xCarbamidomethyl [C11]; 2xTMT6plex [K1; K16]; 1xTMT6plex [N-Term]	1	2	4	W5PVL5	W5PVL5 [235-250]	1	2685.43	16	9.70088e+06	9.07262e+06	1.13674e+07	1.1715e+07	1.38153e+07	1.26914e+07		4	672.109	7.205e-06	4.38
[K].NAPCILFIDEIDAVGR.[K]	1xCarbamidomethyl [C4]; 1xTMT6plex [N-Term]	1	1	2	W5NUL7	W5NUL7 [401-416]	0	2032.07	16	383942	349604	365627	375689	380220	366140		3	678.025	1.673e-05	3.96
[R].EVVVAEETPIVTK.[A]	1xTMT6plex [K13]; 1xTMT6plex [N-Term]	1	2	7	W5NYR6	W5NYR6 [1036-1048]	0	1872.11	13	3.48084e+06	2.96775e+06	3.68042e+06	3.36491e+06	4.10741e+06	3.43477e+06		2	936.553	6.921e-06	4.02
[K].EVVVQQEVVR.[Y]	1xTMT6plex [N-Term]	1	1	13	W5P352	W5P352 [1311-1320]	0	1413.83	10	7.01976e+06	7.52616e+06	8.27535e+06	8.49055e+06	1.29091e+07	9.6767e+06		2	707.416	0.000103	3.51
[K].NAPAIIFIDELDAIAPK.[R]	1xTMT6plex [K17]; 1xTMT6plex [N-Term]	1	1	1	W5PRJ4	W5PRJ4 [296-312]	0	2269.32	17	192768	183407	203814	210198	222429	207118		3	757.109	1.601e-06	3.57
[R].NANDITNEVLDGLNPIQTDVER.[I]	1xDeamidated [N14]; 1xTMT6plex [N-Term]	1	1	1	W5PCV9	W5PCV9 [2293-2314]	0	2670.34	22	123717	113376	138779	160523	157264	138789		3	890.788	1.167e-06	4.31
[K].NANAVIEYEK.[I]	1xTMT6plex [K10]; 1xTMT6plex [N-Term]	1	1	1	W5Q9X1	W5Q9X1 [138-147]	0	1608.9	10	847426	751908	978285	978447	1106319	984010		2	804.948	0.0001239	3.83
[K].EVYEGEVTELTPCETENPMGGYGK.[T]	1xCarbamidomethyl [C13]; 1xDeamidated [N17]; 1xTMT6plex [K24]; 1xTMT6plex [N-Term]	1	1	2	W5P4I0	W5P4I0 [92-115]	0	3148.47	24	351284	301892	346918	427729	391319	342915		3	1050.17	4.068e-07	4.94
[R].IEGDMIVCAAYAHELPK.[Y]	1xCarbamidomethyl [C8]; 1xTMT6plex [K17]; 1xTMT6plex [N-Term]	2	7	6	W5Q4R6; W5QAM9	W5Q4R6 [69-85]; W5QAM9 [69-85]	0	2375.25	17	8.64782e+06	7.41906e+06	9.84641e+06	1.08034e+07	1.17365e+07	1.11313e+07	Shared	3	792.416	2.376e-07	5.13
[K].EVYENYPAYDLTER.[K]	1xTMT6plex [N-Term]	1	2	4	W5PKS6	W5PKS6 [341-354]	0	1990.96	14	271422	259166	338069	348294	327799	304196		2	995.988	3.716e-05	2.61
[R].NALVSHLDGTTPVCEDIGR.[S]	1xCarbamidomethyl [C14]; 1xTMT6plex [N-Term]	1	1	5	W5Q5G6	W5Q5G6 [400-418]	0	2283.16	19	5.01894e+06	4.45775e+06	5.98016e+06	6.05131e+06	5.91778e+06	5.84965e+06		3	761.719	6.922e-06	4.71
[R].NAITQEFGPVPDTAR.[Y]	1xDeamidated [N/Q]; 1xTMT6plex [N-Term]	1	1	3	W5QAA9	W5QAA9 [634-648]	0	1845.95	15	904984	870004	986203	1.15287e+06	1.22971e+06	1.08174e+06		2	923.478	3.342e-05	2.32
[K].EVYQQQQYGSGGR.[G]	1xTMT6plex [N-Term]	1	1	1	W5P8K5	W5P8K5 [233-245]	0	1728.85	13	666080	614326	634808	488860	468818	404460		2	864.931	2.966e-06	3.99
[R].NAITQEFGPVPDTAR.[Y]	1xTMT6plex [N-Term]	1	1	3	W5QAA9	W5QAA9 [634-648]	0	1844.97	15	667251	607399	752766	682651	789865	749612		2	922.991	7.604e-07	4.13
[R].NALLQLSDSQIADVAR.[F]	1xTMT6plex [N-Term]	1	1	2	W5PWZ8	W5PWZ8 [1995-2010]	0	1943.08	16	1.88583e+06	1.74904e+06	2.24686e+06	2.11012e+06	2.27005e+06	2.1914e+06		2	972.038	1.265e-07	4.67
[K].NAQFQEYFIPVAVK.[D]	1xTMT6plex [K14]; 1xTMT6plex [N-Term]	1	1	6	W5PA64	W5PA64 [618-631]	0	2112.19	14	9.39816e+06	9.51627e+06	1.07601e+07	1.16511e+07	1.4018e+07	1.22645e+07		2	1056.59	9.088e-06	4.51
[R].KFDVNTSAVQVLIEHIGNLDR.[A]	1xTMT6plex [K1]; 1xTMT6plex [N-Term]	1	1	5	W5PUT6	W5PUT6 [1077-1097]	1	2826.59	21	3.30498e+06	3.04544e+06	3.7256e+06	3.59581e+06	4.08254e+06	3.80906e+06		3	942.859	5.345e-06	3.99
[K].NASILLEELDLEK.[L]	1xTMT6plex [K13]; 1xTMT6plex [N-Term]	1	1	2	W5PVS3	W5PVS3 [1318-1330]	0	1945.13	13	788598	706824	914447	850989	898763	825035		2	973.06	4.088e-07	2.95
[K].EVVLEDGTIAFK.[N]	1xTMT6plex [K12]; 1xTMT6plex [N-Term]	1	1	4	W5Q6N3	W5Q6N3 [41-52]	0	1779.03	12	8.35799e+06	8.44209e+06	1.01945e+07	5.82298e+06	5.86341e+06	5.22787e+06		2	890.014	3.201e-06	5.29
[K].EVTPEGLQMVK.[K]	1xTMT6plex [K11]; 1xTMT6plex [N-Term]	1	1	1	W5P228	W5P228 [234-244]	0	1688.97	11	2.21779e+06	1.95824e+06	2.40405e+06	2.23256e+06	2.42652e+06	2.19578e+06		2	844.986	9.203e-05	2.62
[K].NCGQTVHDEVANK.[Q]	1xCarbamidomethyl [C2]; 1xTMT6plex [K13]; 1xTMT6plex [N-Term]	1	1	2	W5QA59	W5QA59 [84-96]	0	1929.99	13	4.17061e+06	3.30333e+06	4.28448e+06	3.11205e+06	4.02521e+06	3.00881e+06		3	644	1.646e-05	1.93
[K].NCGQMSEIEAK.[V]	1xCarbamidomethyl [C2]; 1xDeamidated [Q4]; 1xTMT6plex [K11]; 1xTMT6plex [N-Term]	1	1	1	W5PQK6	W5PQK6 [294-304]	0	1725.86	11	761632	620869	761920	902179	1.27557e+06	1.27256e+06		2	863.436	3.934e-05	2.12
[K].NCFSEEGPSAVR.[F]	1xCarbamidomethyl [C2]; 1xTMT6plex [N-Term]	1	1	2	W5PIS6	W5PIS6 [255-266]	0	1581.75	12	817916	762343	1.01353e+06	893113	971615	952398		2	791.379	0.0001172	2.59
[R].KFEDATVQSDMK.[H]	1xOxidation [M11]; 2xTMT6plex [K1; K12]; 1xTMT6plex [N-Term]	1	1	2	W5NSB0	W5NSB0 [78-89]	1	2102.14	12	4.91371e+06	4.54083e+06	6.93628e+06	5.19108e+06	5.86691e+06	5.03223e+06		3	701.387	6.034e-05	3.21
[K].NCEDMDECSIR.[N]	2xCarbamidomethyl [C2; C8]; 1xTMT6plex [N-Term]	1	1	10	W5QIN8	W5QIN8 [569-579]	0	1657.68	11	4.9436e+06	5.55093e+06	3.88197e+06	4.57715e+06	5.22728e+06	4.74562e+06		2	829.345	3.665e-06	3.2
[R].KFEDATVQSDMK.[H]	2xTMT6plex [K1; K12]; 1xTMT6plex [N-Term]	1	1	6	W5NSB0	W5NSB0 [78-89]	1	2086.15	12	1.80672e+07	1.81593e+07	1.92668e+07	2.25145e+07	2.82645e+07	2.54442e+07		2	1043.57	1.748e-05	3.42
[K].NAYEESLDQLETLKR.[E]	1xTMT6plex [K14]; 1xTMT6plex [N-Term]	4	4	4	W5PPG6; W5PT09; W5PBN5; W5PIU1	W5PPG6 [1486-1500]; W5PT09 [1483-1497]; W5PBN5 [1486-1500]; W5PIU1 [1497-1511]	1	2267.23	15	1.37864e+07	4.54649e+06	1.6877e+07	4.72608e+06	4.18687e+06	4.64261e+06	Shared	3	756.411	1.574e-07	2.86
[K].EVTWEVLEGDVEK.[E]	1xTMT6plex [K13]; 1xTMT6plex [N-Term]	1	1	6	W5NY43	W5NY43 [300-312]	0	1991.07	13	1.7355e+06	1.59959e+06	1.90515e+06	1.71515e+06	1.90434e+06	1.70387e+06		2	996.044	7.257e-07	3.82
[R].EVVADLALPMADGR.[E]	1xTMT6plex [N-Term]	1	1	1	W5PT40	W5PT40 [336-349]	0	1685.91	14	619789	524861	577627	596073	708804	624939		2	843.455	3.608e-05	4.12
[R].EVVADSVWVDVK.[D]	1xTMT6plex [K12]; 1xTMT6plex [N-Term]	1	1	6	W5NRI1	W5NRI1 [544-555]	0	1804.03	12	6.89183e+06	5.45522e+06	7.28232e+06	1.24103e+07	1.4011e+07	1.221e+07		2	902.513	3.352e-07	4.07
[K].NCLALADDKK.[L]	1xCarbamidomethyl [C2]; 2xTMT6plex [K9; K10]; 1xTMT6plex [N-Term]	1	1	4	W5PZ59	W5PZ59 [296-305]	1	1835.07	10	9.16268e+06	9.65868e+06	10001663	1.26349e+07	1.80468e+07	1.71176e+07		2	918.031	5.76e-05	3.64
[K].NAYEESLDQLETLK.[R]	1xDeamidated [Q9]; 1xTMT6plex [K14]; 1xTMT6plex [N-Term]	4	4	1	W5PPG6; W5PT09; W5PBN5; W5PIU1	W5PPG6 [1486-1499]; W5PT09 [1483-1496]; W5PBN5 [1486-1499]; W5PIU1 [1497-1510]	0	2112.11	14	313021	115536	337398	149945	113460	184354	Shared	3	704.714	7.647e-05	3.4
[K].LEGDLKDLELQADSAVK.[G]	2xTMT6plex [K6; K17]; 1xTMT6plex [N-Term]	1	2	1	W5PGT5	W5PGT5 [1632-1648]	1	2531.45	17	3.47708e+06	3.35713e+06	3.85852e+06	1.30816e+06	1.42651e+06	1.46298e+06		3	844.487	3.269e-08	5.54
[K].EVVEEAENGR.[E]	1xDeamidated [N8]; 1xTMT6plex [N-Term]	1	1	4	W5QHS1	W5QHS1 [56-65]	0	1361.67	10	1.554e+06	1.34768e+06	1.85305e+06	1.48156e+06	1.85465e+06	1.49964e+06		2	681.34	4.604e-05	3.7
[K].EVVEFYRDPQLESNLSR.[V]	1xTMT6plex [N-Term]	1	1	2	W5PER5	W5PER5 [951-967]	1	2310.19	17	959428	975911	1.09935e+06	1.24631e+06	1.4027e+06	1.15201e+06		3	770.731	3.629e-07	4.38
[K].NAVESYTYNIK.[Q]	1xTMT6plex [K11]; 1xTMT6plex [N-Term]	1	1	3	W5NSB0	W5NSB0 [543-553]	0	1759.96	11	4486767	4.328e+06	4.71998e+06	4.72327e+06	5508766	4.73662e+06		2	880.477	5.891e-06	3.48
[K].NAVEEYVYEMR.[D]	1xTMT6plex [N-Term]	1	1	4	W5PVL5	W5PVL5 [620-630]	0	1631.79	11	728975	581101	792670	706706	799672	738778		2	816.404	9.659e-05	2.63
[R].EVVETPLLHPER.[F]	1xTMT6plex [N-Term]	1	1	9	W5QCP6	W5QCP6 [228-239]	0	1647.93	12	2.10293e+06	1.78229e+06	2.37646e+06	2.20863e+06	2.50969e+06	2.30689e+06		3	549.979	2.371e-06	4.46
[K].NAVEEYVYEFR.[D]	1xTMT6plex [N-Term]	1	1	2	W5PQ75	W5PQ75 [609-619]	0	1647.82	11	975075	891153	1.20224e+06	1.19475e+06	1.11375e+06	1.10552e+06		2	824.412	1.106e-05	3.17
[K].NAVEEYVYDFR.[D]	1xTMT6plex [N-Term]	1	1	5	W5Q334	W5Q334 [805-815]	0	1633.81	11	5.56071e+06	4.33549e+06	6.26933e+06	6.32306e+06	6.64619e+06	6.04811e+06		2	817.407	3.787e-05	3.32
[K].NATNVEQSFMTMAAEIK.[K]	1xTMT6plex [K17]; 1xTMT6plex [N-Term]	1	2	2	W5QFH5	W5QFH5 [155-171]	0	2343.21	17	905487	851416	1.00301e+06	1.03327e+06	1.22284e+06	1.11646e+06		2	1172.1	2.161e-08	3.95
[K].NATNVEQAFMTMAAEIK.[K]	1xTMT6plex [K17]; 1xTMT6plex [N-Term]	1	1	2	W5P010	W5P010 [260-276]	0	2327.21	17	4.41906e+06	4.3406e+06	4.3284e+06	4.76499e+06	5.78159e+06	5.37755e+06		2	1164.1	3.208e-11	5.62
[K].NATDLQNSGMSEEELTK.[A]	1xTMT6plex [K17]; 1xTMT6plex [N-Term]	1	1	3	W5PFR9	W5PFR9 [139-155]	0	2325.16	17	2.21995e+06	2.23925e+06	2.25583e+06	2.1015e+06	2.45617e+06	2.7241e+06		3	775.723	1.868e-05	3.1
[K].NAYEESLDQLETLK.[R]	1xTMT6plex [K14]; 1xTMT6plex [N-Term]	4	4	4	W5PPG6; W5PT09; W5PBN5; W5PIU1	W5PPG6 [1486-1499]; W5PT09 [1483-1496]; W5PBN5 [1486-1499]; W5PIU1 [1497-1510]	0	2111.13	14	5.34407e+06	1.66279e+06	5.54023e+06	1.39708e+06	1.04807e+06	1.67328e+06	Shared	2	1056.06	9.928e-08	4.74
[K].EVPDGLLASSK.[G]	1xTMT6plex [K11]; 1xTMT6plex [N-Term]	1	1	4	A6ZE99	A6ZE99 [365-375]	0	1573.92	11	7.77237e+06	7.78273e+06	1.05657e+07	8.33864e+06	9.84239e+06	8.97527e+06		2	787.461	3.907e-05	2.94
[R].NDIFEDAAILCQR.[V]	1xCarbamidomethyl [C11]; 1xTMT6plex [N-Term]	1	1	2	W5QIX6	W5QIX6 [244-256]	0	1793.91	13	539837	449857	525897	542347	650234	579561		2	897.452	2.082e-06	2.81
[K].EVPAGQYPFIVTSDDGR.[K]	1xTMT6plex [N-Term]	1	1	1	W5PUV3	W5PUV3 [257-273]	0	2080.05	17	378290	439953	437367	443091	444191	412722		2	1040.53	9.786e-06	2.09
[R].NESGEIAAIIHPK.[L]	1xTMT6plex [K13]; 1xTMT6plex [N-Term]	1	1	3	W5Q5Q7	W5Q5Q7 [234-246]	0	1837.06	13	2.00853e+06	1.57309e+06	2.44223e+06	2.2603e+06	2.4849e+06	2.39537e+06		3	613.02	6.023e-05	3.88
[K].EVGGAGQTLAIK.[S]	1xTMT6plex [K12]; 1xTMT6plex [N-Term]	1	1	1	W5P556	W5P556 [577-588]	0	1601.96	12	884612	830396	1.02195e+06	1.0333e+06	1.20052e+06	979921		2	801.483	4.058e-05	2.36
[K].NEQAFEEVFQNANFR.[S]	1xTMT6plex [N-Term]	1	1	1	C5ISB1	C5ISB1 [554-568]	0	2072	15	311943	271396	360716	337818	366072	364702		2	1036.5	3.746e-05	2.64
[R].KFLDGIYVSEK.[G]	2xTMT6plex [K1; K11]; 1xTMT6plex [N-Term]	1	2	2	W5NTE7	W5NTE7 [174-184]	1	1986.19	11	1.18319e+07	1.15923e+07	1.23957e+07	1.36515e+07	1.70304e+07	1.45075e+07		3	662.728	1.32e-05	3.19
[R].EVGIPPEQSLETAK.[A]	1xTMT6plex [K14]; 1xTMT6plex [N-Term]	1	1	19	W5PQ98	W5PQ98 [197-210]	0	1956.11	14	6.34966e+06	5.94042e+06	6.99234e+06	7.81389e+06	8.43555e+06	7.66142e+06		2	978.56	3.812e-05	3.6
[R].EVGMPADYVNK.[L]	1xTMT6plex [K11]; 1xTMT6plex [N-Term]	1	1	1	W5PMI8	W5PMI8 [482-492]	0	1680.9	11	1162172	1.15414e+06	1.25114e+06	1.31933e+06	1.49206e+06	1.35583e+06		2	840.948	0.0001143	3.14
[R].NENTFLDLTVQQIEHLNK.[T]	1xTMT6plex [K18]; 1xTMT6plex [N-Term]	1	1	3	W5QFN9	W5QFN9 [134-151]	0	2614.42	18	2.03097e+06	1.99618e+06	2.25937e+06	2.24557e+06	2.51788e+06	2.40215e+06		3	872.141	3.726e-08	5.72
[K].EVGPTYKDPVCLAK.[M]	1xCarbamidomethyl [C11]; 2xTMT6plex [K7; K14]; 1xTMT6plex [N-Term]	1	3	3	W5P4S5	W5P4S5 [520-533]	1	2264.29	14	5.29341e+06	3.77579e+06	5.88044e+06	7.27305e+06	8.94568e+06	7.30658e+06		3	755.429	1.43e-05	3.47
[K].EVGQQLQDDLMK.[V]	1xTMT6plex [K12]; 1xTMT6plex [N-Term]	1	2	2	W5P5P0	W5P5P0 [144-155]	0	1862.01	12	571158	506750	571032	680743	740701	676626		2	931.504	3.266e-05	1.96
[K].EVGSHFDDFVTNLIER.[S]	1xTMT6plex [N-Term]	1	1	2	W5Q5C8	W5Q5C8 [70-85]	0	2107.07	16	1.1051e+06	1.04419e+06	1.28556e+06	1.3639e+06	1.48846e+06	1.44447e+06		2	1054.04	6.483e-07	3.38
[R].NENQLIIFADDTYPR.[W]	1xTMT6plex [N-Term]	1	1	3	W5P416	W5P416 [1020-1034]	0	2038.04	15	805274	723909	911572	1.05484e+06	1.07913e+06	970267		2	1019.53	1.015e-05	2.04
[R].EVGVDINFPK.[V]	1xTMT6plex [K10]; 1xTMT6plex [N-Term]	1	1	13	W5Q038	W5Q038 [5311-5320]	0	1575.91	10	2.5617e+07	2.42518e+07	2.9701e+07	3.06274e+07	3.6088e+07	3.24469e+07		2	788.457	8.235e-05	2.78
[K].NENLAANFLLSQNFDDE.[-]	1xTMT6plex [N-Term]	1	1	3	W5PJ55	W5PJ55 [364-380]	0	2183.05	17	578656	501179	716992	1.66256e+06	868299	818335		3	728.348	5.92e-05	3.69
[K].NENLAANFLLQQNFDED.[-]	1xTMT6plex [N-Term]	1	1	3	W5PB94	W5PB94 [370-386]	0	2224.07	17	490609	411670	636572	483742	539875	468648		3	742.024	1.97e-05	3.15
[K].NENEETLERPVQLPNAAETLQSPGVENAPIEK.[V]	1xTMT6plex [K32]; 1xTMT6plex [N-Term]	1	1	2	W5Q8V2	W5Q8V2 [469-500]	0	3975.07	32	507344	549543	615116	713047	530576	592578		4	994.523	6.684e-07	4.96
[K].EVGVYEALKDDSWLK.[G]	2xTMT6plex [K9; K15]; 1xTMT6plex [N-Term]	1	2	4	W5QFQ1	W5QFQ1 [224-238]	1	2439.37	15	7.96881e+06	6.81946e+06	9.28175e+06	7.57609e+06	8.97388e+06	7.77939e+06		2	1220.18	3.166e-07	4.12
[R].NELQLVDLPTGR.[S]	1xTMT6plex [N-Term]	1	1	2	W5P3N8	W5P3N8 [545-556]	0	1583.9	12	2.5255e+06	2.34044e+06	2.858e+06	2.64164e+06	3.02246e+06	2751157		2	792.452	6.789e-05	3.38
[K].EVHTQAENAEFMK.[N]	1xTMT6plex [K13]; 1xTMT6plex [N-Term]	1	2	2	A0A5J6SC24	A0A5J6SC24 [23-35]	0	1992.03	13	1.26051e+06	1.1908e+06	1.35325e+06	1.65239e+06	1.6185e+06	1.43693e+06		3	664.678	4.705e-06	4.1
[K].EVKEPLPPLSEDFLLDALSK.[D]	2xTMT6plex [K3; K20]; 1xTMT6plex [N-Term]	1	4	1	C3V6M4	C3V6M4 [569-588]	1	2927.69	20	861701	766311	999441	956042	1.17327e+06	899333		3	976.565	7.778e-09	5.58
[K].EVLASDLVVK.[V]	1xTMT6plex [K10]; 1xTMT6plex [N-Term]	1	2	4	W5PFI3	W5PFI3 [118-127]	0	1530.95	10	8.41987e+06	7.30104e+06	1.06838e+07	8.32358e+06	1.00718e+07	8851575		2	765.976	5.643e-05	3.95
[R].NEIPNSHILDQYR.[N]	1xTMT6plex [N-Term]	1	2	2	W5PNA4	W5PNA4 [214-226]	0	1827.96	13	3.54042e+06	3.29607e+06	3.90551e+06	3.65594e+06	3.90169e+06	3.63884e+06		3	609.986	8.209e-05	3.98
[K].NEINIDTLAR.[D]	1xTMT6plex [N-Term]	1	1	4	W5PJY0	W5PJY0 [519-528]	0	1387.77	10	1.66717e+06	1.51845e+06	1.88038e+06	1.86314e+06	2.09668e+06	1.93471e+06		2	694.388	4.482e-05	3.51
[K].NELMYQLEQDRDLQAVLQER.[E]	1xTMT6plex [N-Term]	1	1	2	W5QCQ4	W5QCQ4 [365-384]	1	2720.39	20	1618699	1.6097e+06	1.63815e+06	2.00388e+06	2.07336e+06	1.79076e+06		3	907.465	3.51e-07	4.44
[K].EVGETSQEGK.[S]	1xTMT6plex [K10]; 1xTMT6plex [N-Term]	1	1	6	W5P9T4	W5P9T4 [530-539]	0	1521.82	10	1.85929e+06	1.80279e+06	2.00066e+06	1.86569e+06	2.18594e+06	1.92913e+06		2	761.415	6.198e-05	2.63
[K].NETFNVTLEPLSFK.[R]	1xTMT6plex [K14]; 1xTMT6plex [N-Term]	1	1	5	W5QAR2	W5QAR2 [571-584]	0	2097.16	14	1.02349e+07	9.67001e+06	1.08364e+07	1.65243e+07	2.02762e+07	1.8356e+07		2	1049.08	2.701e-07	5.22
[K].EVGEALCTDPLVSK.[I]	1xCarbamidomethyl [C7]; 1xTMT6plex [K14]; 1xTMT6plex [N-Term]	1	1	4	W5P9A0	W5P9A0 [178-191]	0	1976.08	14	5.20237e+06	3.94386e+06	5.63028e+06	5.26551e+06	5.9949e+06	5.23216e+06		2	988.541	6.246e-05	2.67
[K].EVGEAFTILSDPK.[K]	1xTMT6plex [K13]; 1xTMT6plex [N-Term]	1	1	1	W5Q9X1	W5Q9X1 [430-442]	0	1864.05	13	1.43178e+06	1.23084e+06	1.71299e+06	1700579	1.94975e+06	1.75721e+06		2	932.527	3.779e-06	3.51
[K].EVEGDDVPESIMLEMK.[A]	1xTMT6plex [K16]; 1xTMT6plex [N-Term]	1	1	2	W5Q5S5	W5Q5S5 [579-594]	0	2279.16	16	431453	368402	312114	473640	432414	482551		2	1140.09	2e-05	2.85
[K].NFGEDMDDER.[L]	1xTMT6plex [N-Term]	1	1	11	W5NPI6	W5NPI6 [133-142]	0	1456.62	10	2.97752e+06	2.6061e+06	2.95762e+06	3.19651e+06	3.94819e+06	3.53926e+06		2	728.813	4.688e-05	3.07
[R].KFLEEGQSLQR.[E]	1xTMT6plex [K1]; 1xTMT6plex [N-Term]	1	1	6	W5QIV5	W5QIV5 [1304-1314]	1	1793.03	11	2.19774e+07	2.29975e+07	2.60764e+07	30826573	3.5973e+07	3.18453e+07		2	897.015	7.791e-05	2.85
[R].NFFSQTLGLGTQK.[E]	1xTMT6plex [K13]; 1xTMT6plex [N-Term]	1	1	1	W5P7B1	W5P7B1 [43-55]	0	1899.07	13	739578	777292	928208	984697	1.03704e+06	981740		2	950.031	0.00012	2.08
[K].NFEEVAFDEK.[K]	1xTMT6plex [K10]; 1xTMT6plex [N-Term]	1	1	22	W5Q9H2	W5Q9H2 [378-387]	0	1685.88	10	7.05409e+07	6.45052e+07	8.5538e+07	6.40813e+07	7.56007e+07	6.43997e+07		2	843.443	9.467e-06	3.33
[R].EVENLILENTQLLETK.[N]	1xTMT6plex [K16]; 1xTMT6plex [N-Term]	1	1	1	W5NYV5	W5NYV5 [395-410]	0	2344.34	16	363693	326783	438551	356155	482183	417701		2	1172.67	2.001e-07	3.96
[R].KFLDGNEMTLADCNLLPK.[L]	1xCarbamidomethyl [C13]; 1xDeamidated [N14]; 2xTMT6plex [K1; K18]; 1xTMT6plex [N-Term]	1	1	3	W5P8X9	W5P8X9 [177-194]	1	2767.5	18	6.3422e+06	5815851	7.15772e+06	7952354	9.26134e+06	8.96326e+06		3	923.173	1.07e-07	4.39
[K].NFDFEDVFVK.[I]	1xTMT6plex [K10]; 1xTMT6plex [N-Term]	1	1	1	W5PI58	W5PI58 [138-147]	0	1717.92	10	3824030	3.67637e+06	3988167	3.62273e+06	4.16775e+06	4.00949e+06		2	859.457	5.404e-05	3.98
[R].EVENVAITALEGLK.[G]	1xTMT6plex [K14]; 1xTMT6plex [N-Term]	1	1	1	W5Q0P3	W5Q0P3 [169-182]	0	1944.14	14	276827	292026	1.0737e+06	375404	1.10392e+06	381643		2	972.572	2.737e-07	3.8
[R].NFDEAVAEGVTFVK.[F]	1xDeamidated [N1]; 1xTMT6plex [K14]; 1xTMT6plex [N-Term]	1	1	1	W5Q6N7	W5Q6N7 [243-256]	0	1985.06	14	1.89371e+06	1.6233e+06	2187845	1.49544e+06	1.77398e+06	1.46739e+06		2	993.043	1.984e-05	2.63
[R].NFDEAVAEGVTFVK.[F]	1xTMT6plex [K14]; 1xTMT6plex [N-Term]	1	1	5	W5Q6N7	W5Q6N7 [243-256]	0	1984.08	14	1.7166e+07	1.549e+07	2.07608e+07	1.95258e+07	22687381	1.88072e+07		2	992.54	1.387e-08	4.72
[RK].NELHNLLDKPQLQGIPVLVLGNK.[R]	1xDeamidated [Q11]; 2xTMT6plex [K9; K23]; 1xTMT6plex [N-Term]	2	3	1	C5IWT9; C5IWT8	C5IWT9 [109-131]; C5IWT8 [109-131]	0	3240.93	23	1751184	1.70608e+06	1.62106e+06	1.75291e+06	1.96603e+06	1.89087e+06	Shared	3	1080.98	5.196e-06	3.2
[R].NFDDIQDSWR.[S]	1xTMT6plex [N-Term]	1	2	4	B2LSM7	B2LSM7 [214-223]	0	1524.73	10	4.2627e+06	4.07918e+06	6.03083e+06	3.80788e+06	5.63684e+06	4.00105e+06		2	762.864	2.588e-05	2.71
[K].NFASVQGVSLESGSFPSYSSYR.[L]	1xTMT6plex [N-Term]	1	1	1	W5P8W6	W5P8W6 [2540-2561]	0	2598.27	22	724409	786053	1.03502e+06	877225	1.03338e+06	961734		3	866.754	1.346e-05	4.95
[R].EVESVDLPNCHLIK.[G]	1xCarbamidomethyl [C10]; 1xTMT6plex [K14]; 1xTMT6plex [N-Term]	1	2	3	W5NZ75	W5NZ75 [33-46]	0	2111.16	14	5.75659e+06	4.84469e+06	6.02278e+06	5.52277e+06	6.70612e+06	6067459		3	704.39	1.595e-05	3.67
[K].NFAMIGLGCAEDGEIVVTDMDTIEK.[S]	1xCarbamidomethyl [C9]; 1xTMT6plex [K25]; 1xTMT6plex [N-Term]	1	1	1	W5PVT6	W5PVT6 [486-510]	0	3186.58	25	36272.2	34364.2	28864.8	43072	32867.2	34796		3	1062.86	1.392e-05	3.37
[K].NEVDADLINAGK.[E]	1xDeamidated [N]; 1xTMT6plex [K12]; 1xTMT6plex [N-Term]	1	1	5	W5PGM1	W5PGM1 [357-368]	0	1717.94	12	899709	787106	1.07114e+06	1.14095e+06	1.28e+06	1.27002e+06		2	859.471	6.456e-06	3.18
[K].NEVDADLINAGK.[E]	1xTMT6plex [K12]; 1xTMT6plex [N-Term]	1	1	14	W5PGM1	W5PGM1 [357-368]	0	1716.95	12	1.88753e+07	1.82166e+07	2.29041e+07	2.74148e+07	3.27891e+07	2.96749e+07		2	858.979	6.238e-08	4.43
[K].EVFGDTLNESR.[D]	1xTMT6plex [N-Term]	1	2	3	W5Q349	W5Q349 [242-252]	0	1495.76	11	903410	877146	907353	1.48686e+06	1.65136e+06	1.4639e+06		2	748.381	3.573e-05	3.34
[R].KFLDGNELTLADCNLLPK.[L]	1xCarbamidomethyl [C13]; 2xTMT6plex [K1; K18]; 1xTMT6plex [N-Term]	1	2	3	W5P610	W5P610 [175-192]	1	2748.56	18	4454836	4.0392e+06	4.88063e+06	4.49725e+06	5.26867e+06	4.88132e+06		3	916.851	5.326e-09	5.22
[K].EVFSMAGVVVR.[A]	1xTMT6plex [N-Term]	1	2	3	W5P1D7	W5P1D7 [236-246]	0	1422.8	11	4.47902e+06	4.54713e+06	5.01586e+06	4.99246e+06	5.7504e+06	5.0961e+06		2	711.896	0.0001022	2.89
[K].NETLGGTCLNVGCIPSK.[A]	2xCarbamidomethyl [C8; C13]; 1xTMT6plex [K17]; 1xTMT6plex [N-Term]	1	1	3	W5PB39	W5PB39 [73-89]	0	2278.19	17	4.12669e+06	4.06069e+06	5.13655e+06	5.57448e+06	6.91081e+06	6.54204e+06		2	1139.6	1.48e-08	4.47
[K].NETGGGEGIEVLK.[N]	1xTMT6plex [K13]; 1xTMT6plex [N-Term]	1	1	8	W5NV10	W5NV10 [32-44]	0	1760.98	13	6.43456e+06	5.7811e+06	6.67551e+06	5.2515e+06	9.24864e+06	4.41633e+06		2	880.999	7.751e-07	3.38
[K].EVGDVSILINNAGIVTGR.[K]	1xTMT6plex [N-Term]	1	2	3	C5IS98	C5IS98 [115-132]	0	2056.16	18	4.06699e+06	4122756	4.85174e+06	4.58827e+06	5.13387e+06	4.62372e+06		2	1028.58	7.916e-10	4.67
[K].NFASVQGVSLESGSFPSYSSYR.[L]	1xDeamidated [Q6]; 1xTMT6plex [N-Term]	1	1	2	W5P8W6	W5P8W6 [2540-2561]	0	2599.25	22	1.38149e+06	1.34317e+06	1.82391e+06	1.58625e+06	2.00725e+06	1718356		3	867.085	5.147e-06	3.41
[RK].NELHNLLDKPQLQGIPVLVLGNK.[R]	2xTMT6plex [K9; K23]; 1xTMT6plex [N-Term]	2	3	3	C5IWT9; C5IWT8	C5IWT9 [109-131]; C5IWT8 [109-131]	0	3239.94	23	7.05267e+06	6.76469e+06	7.85308e+06	8.73681e+06	1.02283e+07	1.00518e+07	Shared	4	810.734	6.824e-08	5.88
[K].IEFTPEQIEEFK.[E]	1xTMT6plex [K12]; 1xTMT6plex [N-Term]	1	2	4	A0A0U1Z4T4	A0A0U1Z4T4 [48-59]	0	1968.07	12	1.68008e+07	19045338	2.56471e+07	7.58132e+06	3.26046e+07	6.26935e+06		2	984.539	1.919e-05	4.42
[K].EVIDTGYGILDR.[K]	1xTMT6plex [N-Term]	1	1	1	W5P296	W5P296 [77-88]	0	1579.85	12	326378	346679	372817	365630	411301	411382		2	790.431	1.936e-05	3.31
[K].NDSVVAGGGAIEMELSK.[Y]	1xTMT6plex [K17]; 1xTMT6plex [N-Term]	1	1	4	W5PQF0	W5PQF0 [402-418]	0	2135.14	17	1.34827e+06	1.18324e+06	1.46224e+06	1.49486e+06	1.75681e+06	1.59017e+06		2	1068.08	1.124e-06	2.84
[K].NDSQVLIELHK.[S]	1xTMT6plex [K11]; 1xTMT6plex [N-Term]	1	1	1	W5P536	W5P536 [263-273]	0	1754.02	11	424616	403492	452647	439721	511763	411909		3	585.342	2.405e-05	3.17
[K].EVLSEVSEGTTK.[R]	1xTMT6plex [K12]; 1xTMT6plex [N-Term]	1	2	1	W5P1S0	W5P1S0 [493-504]	0	1736.97	12	533686	494188	619353	664537	734134	662300		2	868.982	2.305e-06	3.92
[R].KFGDPVVQSDMK.[H]	2xTMT6plex [K1; K12]; 1xTMT6plex [N-Term]	1	6	6	W5PG95	W5PG95 [79-90]	1	2038.16	12	2.20307e+07	2.21211e+07	2.15445e+07	2.37474e+07	2.90883e+07	2.61665e+07		2	1019.58	8.29e-06	3.34
[R].NDSPCGTTIGPILASR.[L]	1xCarbamidomethyl [C5]; 1xTMT6plex [N-Term]	1	1	1	W5QG01	W5QG01 [405-420]	0	1887.98	16	522998	561557	573348	532200	596818	530026		2	944.485	1.052e-05	2.52
[R].NDSLAGVVIADSEYPSR.[V]	1xTMT6plex [N-Term]	1	1	4	W5Q2V0	W5Q2V0 [72-88]	0	2022.03	17	280215	271030	350301	323023	321428	276932		3	674.686	6.893e-05	2.96
[K].EVMFTEEDVK.[F]	1xTMT6plex [K10]; 1xTMT6plex [N-Term]	2	3	2	W5Q1L5; W5P2Q3	W5Q1L5 [134-143]; W5P2Q3 [167-176]	0	1684.89	10	1.0587e+06	974242	1.15549e+06	1.27056e+06	1525810	1.48175e+06	Shared	2	842.949	2.048e-05	3.46
[R].NDSFTTCIELGK.[S]	1xCarbamidomethyl [C7]; 1xTMT6plex [K12]; 1xTMT6plex [N-Term]	1	1	2	W5NZX9	W5NZX9 [1963-1974]	0	1842.97	12	1.43862e+06	1.46723e+06	1.4912e+06	1.58541e+06	1.80228e+06	1.64242e+06		2	921.982	1.975e-06	4.13
[K].NDQDTWDYTNPNLSGQGDPGSNPNK.[R]	2xDeamidated [N10; N12]; 1xTMT6plex [K25]; 1xTMT6plex [N-Term]	1	1	1	W5P779	W5P779 [183-207]	0	3194.46	25	94833	96396.8	87378.1	98846.2	89447.1	92551.1		3	1065.5	2.27e-05	3.47
[K].NDQDTWDYTNPNLSGQGDPGSNPNK.[R]	1xDeamidated [N]; 1xTMT6plex [K25]; 1xTMT6plex [N-Term]	1	1	2	W5P779	W5P779 [183-207]	0	3193.47	25	299391	327093	342531	316913	340748	298324		3	1065.17	1.244e-05	3.15
[K].NDPPMEAAGFTAQVIVLDHPGQTSVGYAPVLDCHTAHIACK.[F]	2xCarbamidomethyl [C33; C40]; 1xDeamidated [Q13]; 1xTMT6plex [K41]; 1xTMT6plex [N-Term]	1	1	1	W5QII3	W5QII3 [263-303]	0	4847.4	41	430353	403898	481702	435279	423000	399111		5	970.286	5.166e-05	6.03
[K].NDSVVAGGGAIEMELSK.[Y]	1xOxidation [M13]; 1xTMT6plex [K17]; 1xTMT6plex [N-Term]	1	1	1	W5PQF0	W5PQF0 [402-418]	0	2151.14	17	481662	453246	606439	480398	580403	517294		3	717.716	8.828e-06	3.45
[K].EVMQEVAQLSQFDEELYK.[V]	1xTMT6plex [K18]; 1xTMT6plex [N-Term]	1	2	1	W5QCS4	W5QCS4 [232-249]	0	2644.36	18	353951	298891	373235	403101	412522	425347		3	882.12	4.229e-07	5.36
[K].NDPPMEAAGFTAQVIILNHPGQISAGYAPVLDCHTAHIACK.[F]	2xCarbamidomethyl [C33; C40]; 3xDeamidated [Q13; N18; Q22]; 1xTMT6plex [K41]; 1xTMT6plex [N-Term]	1	6	2	W5PD15	W5PD15 [331-371]	0	4846.4	41	1.69922e+06	1.55673e+06	1.65224e+06	1.55322e+06	1.40924e+06	1.20169e+06		5	970.089	1.899e-06	6.43
[K].NDPPMEAAGFTAQVIILNHPGQISAGYAPVLDCHTAHIACK.[F]	2xCarbamidomethyl [C33; C40]; 1xTMT6plex [K41]; 1xTMT6plex [N-Term]	1	6	2	W5PD15	W5PD15 [331-371]	0	4843.45	41	1.32433e+06	1177787	1.32217e+06	1.28292e+06	1.20762e+06	1.00506e+06		5	969.488	1.712e-05	6.45
[K].NDPIVSSLPTDVK.[T]	1xTMT6plex [K13]; 1xTMT6plex [N-Term]	1	1	5	W5PC25	W5PC25 [208-220]	0	1843.06	13	3.18334e+06	2.91731e+06	3.61033e+06	3.85479e+06	4.57666e+06	4.36115e+06		2	922.026	4.904e-05	2.58
[R].NDPLLMGIPTSENPFK.[D]	1xDeamidated [N13]; 1xTMT6plex [K16]; 1xTMT6plex [N-Term]	1	1	1	W5PP04	W5PP04 [49-64]	0	2232.2	16	1844484	1.99145e+06	1.90942e+06	2.07714e+06	2491556	2.35589e+06		2	1116.6	2.063e-05	3.06
[R].NDPLLMGIPTSENPFK.[D]	1xTMT6plex [K16]; 1xTMT6plex [N-Term]	1	1	7	W5PP04	W5PP04 [49-64]	0	2231.21	16	8.85813e+06	7.74557e+06	9.94264e+06	9.58825e+06	1.12293e+07	1.01977e+07		2	1116.1	3.577e-06	4.07
[R].EVNEVIQNPATITR.[I]	1xTMT6plex [N-Term]	1	1	1	W5QCB6	W5QCB6 [74-87]	0	1813	14	327193	298561	349090	335787	350809	335114		2	907.002	9.041e-06	4.15
[K].NDPHLCDFIETHYLNEQVEAIK.[E]	1xCarbamidomethyl [C6]; 1xDeamidated [N15]; 1xTMT6plex [K22]; 1xTMT6plex [N-Term]	1	5	1	K4PF69	K4PF69 [126-147]	0	3144.57	22	906335	846421	1.00932e+06	1.2794e+06	1.38107e+06	1.25716e+06		4	786.898	2.199e-05	4.04
[K].NDPHLCDFIETHYLNEQVEAIK.[E]	1xCarbamidomethyl [C6]; 1xTMT6plex [K22]; 1xTMT6plex [N-Term]	1	5	1	K4PF69	K4PF69 [126-147]	0	3143.59	22	489451	423062	557166	682848	628804	585820		3	1048.52	1.595e-09	4.11
[K].EVNLAVQDAK.[A]	1xTMT6plex [K10]; 1xTMT6plex [N-Term]	1	1	7	W5PPG3	W5PPG3 [25-34]	0	1544.9	10	1.05948e+07	9.76009e+06	1.21885e+07	1.27858e+07	1.44906e+07	1.33434e+07		2	772.954	4.819e-05	3.96
[K].EVNPALGIDCLHK.[G]	1xCarbamidomethyl [C10]; 1xTMT6plex [K13]; 1xTMT6plex [N-Term]	1	1	1	W5PXX7	W5PXX7 [484-496]	0	1924.07	13	5641978	5422517	6565945	5.49399e+06	6370728	5.99907e+06		3	642.024	1.069e-06	4.33
[R].NDIVNMLVGNK.[I]	1xTMT6plex [K11]; 1xTMT6plex [N-Term]	1	1	5	W5Q3W4	W5Q3W4 [113-123]	0	1674.96	11	6.47512e+06	6.35575e+06	7.32527e+06	7.46096e+06	9.27703e+06	8.26485e+06		2	837.978	4.7e-06	3.95
[K].EVMSDLEESK.[Y]	1xTMT6plex [K10]; 1xTMT6plex [N-Term]	1	1	1	W5QD97	W5QD97 [463-472]	0	1624.85	10	230936	183905	223822	244745	272850	262168		2	812.928	2.466e-05	2.16
[K].EWEMWCEELK.[Q]	1xCarbamidomethyl [C6]; 1xTMT6plex [K10]; 1xTMT6plex [N-Term]	1	2	1	W5QJ27	W5QJ27 [3450-3459]	0	1897.92	10	1.32783e+06	1.39741e+06	1370413	1.72256e+06	2.03433e+06	1.74445e+06		2	949.458	3.487e-05	3.8
[K].LEGALGADTTEDGEEK.[S]	1xTMT6plex [K16]; 1xTMT6plex [N-Term]	1	1	2	W5NW35	W5NW35 [1078-1093]	0	2093.07	16	664574	618746	625534	787622	752304	654418		3	698.359	2.153e-05	3.3
[R].EVLQEGVPLVHQGLK.[A]	1xTMT6plex [K15]; 1xTMT6plex [N-Term]	1	3	3	W5PBE1	W5PBE1 [61-75]	0	2104.25	15	2.91565e+06	2.82082e+06	3.34286e+06	3.10845e+06	3.77795e+06	3.18778e+06		3	702.086	2.674e-05	3.71
[R].EVLEAESAWR.[Y]	1xTMT6plex [N-Term]	1	1	6	W5Q2U7	W5Q2U7 [3413-3422]	0	1418.75	10	5.01403e+06	4.66556e+06	5672022	6594861	7.79524e+06	7.19145e+06		2	709.878	9.49e-05	3.72
[R].EVLELGQVLDTGK.[R]	1xTMT6plex [K13]; 1xTMT6plex [N-Term]	1	1	3	W5Q826	W5Q826 [65-77]	0	1859.09	13	2.35627e+06	1.86463e+06	2.89562e+06	2.47017e+06	2.85105e+06	2.2378e+06		2	930.044	5.385e-06	4.49
[R].NELESYAYSLK.[N]	1xTMT6plex [K11]; 1xTMT6plex [N-Term]	1	1	6	W5PTR5	W5PTR5 [565-575]	0	1774.96	11	1.00137e+07	8.35161e+06	1.08634e+07	9.62787e+06	9.70202e+06	8.65463e+06		2	887.979	7.158e-06	4.94
[R].EVIELPLTNPELFQR.[V]	1xTMT6plex [N-Term]	1	1	3	W5Q805	W5Q805 [161-175]	0	2027.14	15	2.4963e+06	2.03579e+06	2.79407e+06	2.65505e+06	2.863e+06	2.83412e+06		2	1014.07	2.676e-06	3.94
[R].KFHEEEQLLQEREEQLR.[R]	1xTMT6plex [K1]; 1xTMT6plex [N-Term]	2	5	3	P22793; W5QIV5	P22793 [1124-1140]; [1230-1246]; W5QIV5 [1067-1083]; [1120-1136]	2	2699.45	17	1.33085e+06	1.08508e+06	1.55176e+06	1.16544e+06	1.4255e+06	1.35503e+06	Shared	4	675.614	1.174e-05	2.36
[K].NEGVIEFVSYSDMK.[R]	1xTMT6plex [K14]; 1xTMT6plex [N-Term]	1	1	2	W5NWQ4	W5NWQ4 [127-140]	0	2076.07	14	2.52185e+06	2314965	2.54573e+06	2.34149e+06	2.51514e+06	2.21483e+06		2	1038.53	3.467e-06	2.99
[R].EVLEQSGFTADDINK.[V]	1xTMT6plex [K15]; 1xTMT6plex [N-Term]	1	1	2	W5PAY7	W5PAY7 [314-328]	0	2124.12	15	1.30578e+06	1.24947e+06	1.47837e+06	1.50715e+06	1.72229e+06	1.45609e+06		2	1062.56	7.109e-06	2.88
[R].NEGVATYAAAVLFR.[M]	1xTMT6plex [N-Term]	1	4	4	W5NY24	W5NY24 [649-662]	0	1710.94	14	1.06673e+07	9.2749e+06	1.25968e+07	1.12263e+07	1.2568e+07	1.14756e+07		2	855.966	1.704e-06	4
[R].NEGTATYAAAVLFR.[I]	1xTMT6plex [N-Term]	1	1	9	W5Q7R8	W5Q7R8 [640-653]	0	1712.92	14	1.64033e+07	1.64973e+07	1.93372e+07	2.1205e+07	2.50368e+07	2.28591e+07		2	856.956	1.326e-07	5.3
[R].LEFVCSFLQK.[N]	1xCarbamidomethyl [C5]; 1xTMT6plex [K10]; 1xTMT6plex [N-Term]	1	1	3	W5P0C1	W5P0C1 [61-70]	0	1728.98	10	7.17671e+06	6.59353e+06	7.34172e+06	6.19075e+06	7.46403e+06	7.54434e+06		2	864.985	6.658e-05	3.55
[K].NEESLVFVQTDKPIYKPEQTVK.[F]	3xTMT6plex [K12; K16; K22]; 1xTMT6plex [N-Term]	1	1	4	W5NSA6	W5NSA6 [124-145]	0	3509.01	22	3.06819e+06	2.09307e+06	3.48852e+06	5.80409e+06	6.60185e+06	4.82064e+06		4	878.003	2.341e-07	4.71
[K].EVIQEWNLTNIK.[R]	1xTMT6plex [K12]; 1xTMT6plex [N-Term]	1	1	6	W5PQK6	W5PQK6 [355-366]	0	1945.12	12	8.80167e+06	8.00099e+06	9.07085e+06	1.02841e+07	1.18167e+07	1.04953e+07		2	973.053	1.098e-05	4.16
[R].IEGAHPEDRDVSNICVPMTASNTQDR.[M]	1xCarbamidomethyl [C15]; 1xTMT6plex [N-Term]	1	1	1	W5P988	W5P988 [687-712]	1	3141.49	26	1.41882e+06	1.37181e+06	1.51012e+06	1.83702e+06	2.09267e+06	2.02567e+06		4	786.13	2.671e-05	3.59
[R].NEEQVGQAIR.[S]	1xTMT6plex [N-Term]	1	1	4	W5PHN8	W5PHN8 [57-66]	0	1372.74	10	2.4614e+06	2.16161e+06	3.00867e+06	3.41209e+06	3.77621e+06	3.73255e+06		2	686.873	0.0001304	2.76
[R].KFHEEEQLLQER.[E]	1xTMT6plex [K1]; 1xTMT6plex [N-Term]	2	5	18	P22793; W5QIV5	P22793 [1124-1135]; [1230-1241]; W5QIV5 [1067-1078]; [1120-1131]	1	2044.12	12	1.09756e+08	1.06065e+08	1.20232e+08	1.10089e+08	1.28606e+08	1.12279e+08	Shared	3	682.043	8.387e-06	3.84
[K].NEEIDEMLK.[E]	1xTMT6plex [K9]; 1xTMT6plex [N-Term]	1	2	4	W5Q8N4	W5Q8N4 [63-71]	0	1578.84	9	711331	529003	1.36676e+06	609542	1.16859e+06	576207		2	789.925	6.423e-05	2.58
[R].NECFLNHKDDSPDLPK.[L]	1xCarbamidomethyl [C3]; 2xDeamidated [N1; N6]; 2xTMT6plex [K8; K16]; 1xTMT6plex [N-Term]	2	2	11	W5PWE9; P14639	W5PWE9 [123-138]; P14639 [123-138]	1	2618.34	16	8.36543e+06	6883273	9.8931e+06	9122546	9.74529e+06	7.76824e+06	Shared	4	655.337	5.872e-05	2.47
[R].NECFLNHKDDSPDLPK.[L]	1xCarbamidomethyl [C3]; 1xDeamidated [N]; 2xTMT6plex [K8; K16]; 1xTMT6plex [N-Term]	2	2	36	W5PWE9; P14639	W5PWE9 [123-138]; P14639 [123-138]	1	2617.35	16	1.53922e+08	1.07152e+08	148270886	1.52914e+08	1.69529e+08	1.31343e+08	Shared	4	655.091	4.08e-07	4.84
[R].NECFLNHKDDSPDLPK.[L]	1xCarbamidomethyl [C3]; 2xTMT6plex [K8; K16]; 1xTMT6plex [N-Term]	2	2	21	W5PWE9; P14639	W5PWE9 [123-138]; P14639 [123-138]	1	2616.37	16	3.70609e+08	2.5596e+08	3.6499e+08	4.00939e+08	4.54252e+08	3.17248e+08	Shared	3	872.789	4.106e-08	4.44
[K].NEAIQAAHDAVAQEGQCR.[V]	1xCarbamidomethyl [C17]; 1xTMT6plex [N-Term]	1	1	3	W5PUL3	W5PUL3 [165-182]	0	2197.06	18	2.0322e+06	1.87941e+06	2.19751e+06	2.47702e+06	2.5569e+06	2.70451e+06		3	733.022	0.0001047	3.5
[K].NEAGIVSCTAR.[L]	1xCarbamidomethyl [C8]; 1xTMT6plex [N-Term]	1	2	8	W5Q1W7	W5Q1W7 [1087-1097]	0	1406.73	11	1.06889e+07	8.11895e+06	1.1871e+07	1.56181e+07	1.93551e+07	17009180		2	703.867	1.284e-05	3.46
[K].NEAEATEYICR.[L]	1xCarbamidomethyl [C10]; 1xTMT6plex [N-Term]	1	1	2	W5PZB7	W5PZB7 [418-428]	0	1584.75	11	344395	308935	379384	255523	270988	262194		2	792.877	1.881e-05	3.42
[K].NDWMEAEEK.[K]	1xTMT6plex [K9]; 1xTMT6plex [N-Term]	1	2	14	W5PD77	W5PD77 [175-183]	0	1609.79	9	2.0849e+07	2.0236e+07	1.95607e+07	2.07345e+07	2.48878e+07	2.07201e+07		2	805.4	5.016e-05	3.51
[R].KFGYVDFESAEDLEK.[A]	2xTMT6plex [K1; K15]; 1xTMT6plex [N-Term]	1	3	1	W5QHQ7	W5QHQ7 [317-331]	1	2464.32	15	3.99393e+06	4069489	4.46436e+06	5.3525e+06	6255379	5218839		3	822.112	2.361e-06	4.13
[R].EVLGISDTLIR.[L]	1xTMT6plex [N-Term]	1	2	1	W5PQY2	W5PQY2 [365-375]	0	1444.86	11	1176952	969903	1.31894e+06	1260720	1.46885e+06	1.24023e+06		2	722.928	4.123e-05	3.71
[K].NFGEEVDDENLKELFSQFGK.[T]	2xTMT6plex [K12; K20]; 1xTMT6plex [N-Term]	1	1	1	W5QFP1	W5QFP1 [197-216]	1	3032.58	20	883902	829304	1.08702e+06	745274	859554	759748		3	1011.52	1.958e-07	4.19
[K].NAIDDGCVVPGAGAVEVAMAEALVK.[Y]	1xCarbamidomethyl [C7]; 1xTMT6plex [K25]; 1xTMT6plex [N-Term]	1	2	1	W5PJX1	W5PJX1 [400-424]	0	2914.54	25	2.18208e+06	1.87176e+06	2.71813e+06	2.37903e+06	2886339	2505262		3	972.18	3.097e-09	4.95
[K].NAIANASTLAEVER.[L]	1xDeamidated [N5]; 1xTMT6plex [N-Term]	1	2	2	B2LU27	B2LU27 [206-219]	0	1688.9	14	563047	373139	664239	407897	532327	516612		2	844.95	3.816e-05	1.91
[-].MSTENQNVEER.[L]	1xTMT6plex [N-Term]	1	1	1	W5QHJ9	W5QHJ9 [1-11]	0	1565.74	11	334614	347877	411633	349950	390289	328067		2	783.374	3.856e-05	3.15
[R].FAMEPDDFDADALR.[D]	1xTMT6plex [N-Term]	1	1	4	W5QC35	W5QC35 [488-501]	0	1841.86	14	2.06589e+06	1.9286e+06	2.19542e+06	2.20855e+06	3.25241e+06	2.42674e+06		2	921.43	7.533e-07	4.19
[K].FAMVAPDVQIEDGK.[G]	1xTMT6plex [K14]; 1xTMT6plex [N-Term]	1	1	3	W5P353	W5P353 [427-440]	0	1978.07	14	5.37096e+06	5.84779e+06	5.96942e+06	5.7244e+06	7268406	6.86199e+06		2	989.531	1.924e-05	3.39
[K].MSSYAFFVQTCR.[E]	1xCarbamidomethyl [C11]; 1xTMT6plex [N-Term]	2	7	5	W5Q6J0; W5Q343	W5Q6J0 [13-24]; W5Q343 [13-24]	0	1725.83	12	1.17869e+07	1.13042e+07	1.2892e+07	1.15879e+07	1.37091e+07	1.11082e+07	Shared	2	863.41	4.537e-05	2.7
[K].MSSVEDDSDTK.[K]	1xTMT6plex [K11]; 1xTMT6plex [N-Term]	1	2	3	W5PCR3	W5PCR3 [382-392]	0	1671.81	11	530131	553382	649409	659482	816295	673791		2	836.408	3.603e-05	2.31
[K].MSSTFIGNSTAIQELFK.[R]	1xTMT6plex [K17]; 1xTMT6plex [N-Term]	1	2	3	W5Q039	W5Q039 [363-379]	0	2332.26	17	3.79442e+06	3.93262e+06	3.86919e+06	4.99081e+06	5.80905e+06	5.29639e+06		2	1166.63	3.144e-09	5
[R].FAPGDFQGFALVNPQR.[N]	1xTMT6plex [N-Term]	1	1	4	W5PEL7	W5PEL7 [1211-1226]	0	1993.05	16	9.3088e+06	8.77393e+06	1.07077e+07	1.09014e+07	1.22943e+07	1.18816e+07		2	997.02	2.367e-06	3.77
[R].FAPPQPAEPWIFVK.[N]	1xTMT6plex [K14]; 1xTMT6plex [N-Term]	1	1	5	W5QA37	W5QA37 [65-78]	0	2085.19	14	6.93189e+06	6.82527e+06	8.44512e+06	8.11476e+06	8.92451e+06	7.97763e+06		2	1043.09	3.045e-05	3.61
[K].MSQVAPSLSALIGEAVGAR.[L]	1xTMT6plex [N-Term]	1	1	2	W5P916	W5P916 [289-307]	0	2086.15	19	2.13477e+06	2.13204e+06	2.29966e+06	2.5908e+06	2.67199e+06	2.41662e+06		2	1043.58	5.176e-08	4.92
[K].FAQALGLTEAVK.[V]	1xTMT6plex [K12]; 1xTMT6plex [N-Term]	1	2	5	W5PNR9	W5PNR9 [562-573]	0	1706.03	12	6.18422e+06	5.7749e+06	7.36924e+06	7.08789e+06	8.14728e+06	7296912		2	853.511	1.099e-06	3.23
[K].FAQDVSQDDLIR.[A]	1xTMT6plex [N-Term]	1	1	4	W5P9G5	W5P9G5 [135-146]	0	1635.85	12	3.21393e+06	2.60494e+06	3.41763e+06	2.86333e+06	3.39127e+06	3.07297e+06		2	818.429	3.049e-06	2.84
[R].FAQPGSFEYEYAMR.[W]	1xTMT6plex [N-Term]	1	1	3	W5Q681	W5Q681 [257-270]	0	1924.91	14	3.42506e+06	3.4275e+06	3.58524e+06	3.6773e+06	4.03874e+06	3.89725e+06		2	962.956	2.341e-05	3.55
[K].MSQEEVNVFR.[L]	1xTMT6plex [N-Term]	1	1	1	W5PY70	W5PY70 [346-355]	0	1467.75	10	1.64675e+06	1.52281e+06	1.67296e+06	1.47504e+06	1.82206e+06	1.63143e+06		2	734.371	9.682e-05	3.04
[R].FASEASGYQDNIAR.[L]	1xTMT6plex [N-Term]	1	1	12	W5QG29	W5QG29 [356-369]	0	1757.87	14	1.76773e+07	1.9321e+07	1.62607e+07	9.90002e+06	1.06661e+07	9.78398e+06		2	879.431	3.323e-07	5.11
[R].FASEIAGVDDLGTTGR.[G]	1xTMT6plex [N-Term]	1	1	5	W5QB34	W5QB34 [185-200]	0	1837.95	16	3.03816e+06	2.30089e+06	3.47112e+06	2.66619e+06	3.1192e+06	2.75861e+06		2	919.472	3.559e-07	3.1
[R].FASENDLPEWK.[E]	1xTMT6plex [K11]; 1xTMT6plex [N-Term]	1	1	6	W5QAB7	W5QAB7 [58-68]	0	1793.95	11	2.06273e+07	1.5958e+07	2.73682e+07	1.7215e+07	19108234	1.69036e+07		2	897.47	3.074e-05	3.67
[K].MSISEGTVSDK.[S]	1xTMT6plex [K11]; 1xTMT6plex [N-Term]	1	2	1	W5P564	W5P564 [1510-1520]	0	1611.87	11	717002	661121	874426	871127	1.00731e+06	807160		2	806.434	1.317e-05	2.56
[K].MSINAEEVVVGDLVEVK.[G]	1xTMT6plex [K17]; 1xTMT6plex [N-Term]	1	2	3	P04074	P04074 [176-192]	0	2289.28	17	2.08452e+06	2.03088e+06	2.07666e+06	2.40918e+06	2.61236e+06	2.72999e+06		2	1145.14	3.876e-07	1.81
[R].MSLIEEEGVKR.[I]	1xTMT6plex [K10]; 1xTMT6plex [N-Term]	1	3	2	Q5MIB5	Q5MIB5 [429-439]	1	1749	11	1.30163e+06	1.15931e+06	1.47194e+06	1.73508e+06	2.28185e+06	2.05632e+06		2	874.998	6.44e-05	3.63
[K].FASQQGMTAYGTR.[R]	1xTMT6plex [N-Term]	1	2	2	Q7YRL2	Q7YRL2 [173-185]	0	1646.82	13	2.12777e+06	2.48016e+06	2.12929e+06	1.75212e+06	1.87971e+06	1.8214e+06		2	823.907	2.311e-07	4.73
[R].MSLIEEEGVK.[R]	1xTMT6plex [K10]; 1xTMT6plex [N-Term]	1	3	3	Q5MIB5	Q5MIB5 [429-438]	0	1592.9	10	1.16482e+07	1.01685e+07	1.29751e+07	1.62349e+07	1.83607e+07	1.67645e+07		2	796.948	9.57e-05	3.32
[K].LEGVLAEVAQHYQDTLIR.[A]	1xTMT6plex [N-Term]	1	1	3	W5PU66	W5PU66 [621-638]	0	2284.25	18	1.89795e+06	1.86748e+06	2.32097e+06	2.55328e+06	2.91893e+06	2.78536e+06		3	762.081	1.681e-09	7.48
[K].MSGGWELEVNGTEAK.[L]	1xDeamidated [N10]; 1xTMT6plex [K15]; 1xTMT6plex [N-Term]	1	1	4	W5NZL1	W5NZL1 [102-116]	0	2067.05	15	5.55724e+06	4487680	6.07397e+06	5.659e+06	6.783e+06	6.28671e+06		2	1034.03	2.332e-06	3.01
[R].FAIQDISVEETSAK.[E]	1xTMT6plex [K14]; 1xTMT6plex [N-Term]	4	5	19	W5P0L8; W5P9P1; W5QJ62; W5P707	W5P0L8 [141-154]; W5P9P1 [149-162]; W5QJ62 [112-125]; W5P707 [122-135]	0	1996.1	14	3.78657e+07	3.50434e+07	4.22947e+07	4.59714e+07	4.95986e+07	4.60731e+07	Shared	2	998.55	7.303e-08	4.88
[K].KESDLNGAQIK.[L]	1xDeamidated [N6]; 2xTMT6plex [K1; K11]; 1xTMT6plex [N-Term]	1	1	4	W5Q9T3	W5Q9T3 [124-134]	1	1891.11	11	1.25914e+07	1.26786e+07	1.3499e+07	9.84473e+06	1.17032e+07	9.85808e+06		3	631.04	6.06e-05	3.78
[R].FALGIFAINEAVEK.[G]	1xTMT6plex [K14]; 1xTMT6plex [N-Term]	1	1	1	W5PU66	W5PU66 [676-689]	0	1980.16	14	649573	643467	717942	927505	1.05849e+06	998877		2	990.582	2.824e-05	2.68
[R].MSVDAVEIETLR.[K]	1xTMT6plex [N-Term]	1	2	2	W5PNR9	W5PNR9 [102-113]	0	1591.86	12	834475	748868	931485	1.03331e+06	1.14079e+06	1.0253e+06		2	796.434	5.256e-05	2.57
[K].MTISQQEFGR.[T]	1xTMT6plex [N-Term]	1	1	1	A7UHZ2	A7UHZ2 [263-272]	0	1425.74	10	2477022	2.22892e+06	2.95701e+06	2.7045e+06	3.25077e+06	2865916		2	713.364	8.474e-05	4.02
[K].FADLSEAANR.[N]	1xTMT6plex [N-Term]	2	3	19	K4P1S1; A4ZYA6	K4P1S1 [217-226]; A4ZYA6 [295-304]	0	1322.69	10	1.27948e+08	1.45632e+08	1.43132e+08	1.60899e+08	2.04497e+08	1.83139e+08	Shared	2	661.844	4.51e-05	3.21
[K].FADLSEAANR.[N]	1xDeamidated [N9]; 1xTMT6plex [N-Term]	2	3	9	K4P1S1; A4ZYA6	K4P1S1 [217-226]; A4ZYA6 [295-304]	0	1323.67	10	5.94116e+06	5.88567e+06	6.09055e+06	7.50069e+06	8.95795e+06	8.18071e+06	Shared	2	662.336	2.566e-05	3.77
[K].FADLSEAANRNNDALR.[Q]	1xDeamidated [N11]; 1xTMT6plex [N-Term]	2	3	4	K4P1S1; A4ZYA6	K4P1S1 [217-232]; A4ZYA6 [295-310]	1	2007.01	16	2.81448e+06	2.62905e+06	3.15377e+06	3.36415e+06	4.09616e+06	3.69964e+06	Shared	3	669.671	3.403e-05	3.51
[K].MTLPDVDMDLK.[G]	1xTMT6plex [K11]; 1xTMT6plex [N-Term]	1	1	5	W5Q038	W5Q038 [1069-1079]	0	1735.94	11	1.37288e+07	1.40215e+07	1.43653e+07	1.75436e+07	2.06323e+07	1.78623e+07		2	868.471	9.925e-06	4.12
[R].MTLADDVTLDDLIMAK.[D]	1xTMT6plex [K16]; 1xTMT6plex [N-Term]	1	1	4	W5NZR9	W5NZR9 [380-395]	0	2223.2	16	3.69688e+06	3.59902e+06	3.91596e+06	4.37116e+06	4.67289e+06	4.36949e+06		2	1112.09	2.507e-07	2.38
[K].MTGLVDEAIDTK.[S]	1xOxidation [M1]; 1xTMT6plex [K12]; 1xTMT6plex [N-Term]	2	2	8	W5PFJ0; W5PFI7	W5PFJ0 [636-647]; W5PFI7 [640-651]	0	1766.96	12	2.56213e+06	2.39868e+06	4.24368e+06	2.79047e+06	3.60918e+06	3.26915e+06	Shared	2	883.982	1.931e-05	2.01
[K].MTGLVDEAIDTK.[S]	1xTMT6plex [K12]; 1xTMT6plex [N-Term]	2	2	5	W5PFJ0; W5PFI7	W5PFJ0 [636-647]; W5PFI7 [640-651]	0	1750.97	12	7.9851e+06	7.7595e+06	8.7781e+06	7.93914e+06	9.38219e+06	8.62641e+06	Shared	2	875.981	7.111e-07	4.83
[R].LEGVEGVAHIIDPK.[A]	1xTMT6plex [K14]; 1xTMT6plex [N-Term]	1	1	4	W5NYP8	W5NYP8 [2244-2257]	0	1935.13	14	7.42774e+06	6.76371e+06	7707055	8.155e+06	8.92472e+06	8.50719e+06		2	968.061	2.311e-05	2.71
[K].MTFSNPSELDELMSEEAYEK.[Y]	1xTMT6plex [K20]; 1xTMT6plex [N-Term]	1	1	1	W5NTG3	W5NTG3 [149-168]	0	2808.34	20	780646	750728	817083	783834	1.03479e+06	748211		3	936.775	1.445e-06	4.11
[K].MTESSLPSASK.[T]	1xTMT6plex [K11]; 1xTMT6plex [N-Term]	1	2	8	W5PGT5	W5PGT5 [643-653]	0	1595.87	11	1.65361e+07	1.78747e+07	1.51493e+07	9.00065e+06	1.0301e+07	9.73451e+06		2	798.433	5.711e-06	3.08
[K].KEPALLELEGK.[K]	2xTMT6plex [K1; K11]; 1xTMT6plex [N-Term]	1	2	12	W5QG16	W5QG16 [314-324]	1	1914.19	11	3.86531e+07	3.67792e+07	4.58077e+07	5.10337e+07	6.25759e+07	5.92316e+07		3	638.729	3.75e-07	4.96
[R].MTDQEAIQDLWQWR.[K]	1xTMT6plex [N-Term]	1	5	12	W5QIQ4	W5QIQ4 [278-291]	0	2049.01	14	2.436e+07	2.34126e+07	2.65592e+07	2.51661e+07	3.22291e+07	2.7967e+07		2	1025	1.17e-07	4.33
[K].MTDEEIMEK.[L]	1xTMT6plex [K9]; 1xTMT6plex [N-Term]	1	1	5	W5QGL6	W5QGL6 [227-235]	0	1583.81	9	2.56709e+06	2.19657e+06	2.66265e+06	2.85741e+06	3.27682e+06	3.22133e+06		2	792.405	4.972e-05	2.91
[R].MTAFDADDPATDNALLR.[Y]	1xTMT6plex [N-Term]	1	1	6	W5PIJ5	W5PIJ5 [162-178]	0	2066.01	17	1.23117e+06	1.21362e+06	1.32768e+06	1.50137e+06	1.77078e+06	1.64472e+06		2	1033.5	5.71e-06	3.35
[R].FAERPALLELER.[F]	1xTMT6plex [N-Term]	1	1	1	W5NV20	W5NV20 [486-497]	0	1672.96	12	869781	823726	950437	731288	945366	827086		3	558.321	6.282e-05	4.68
[R].MTAAQPSETTVGNMVR.[R]	1xTMT6plex [N-Term]	1	1	1	W5NTZ6	W5NTZ6 [68-83]	0	1921.97	16	447253	379942	438168	484893	490976	479651		2	961.48	1.868e-05	3.42
[K].MSVQPTVSLGGFEITPPVVLR.[L]	1xOxidation [M1]; 1xTMT6plex [N-Term]	1	5	2	W5QIQ4	W5QIQ4 [81-101]	0	2472.37	21	1.29878e+06	1.24045e+06	1.58154e+06	1.37227e+06	1.47473e+06	1.40171e+06		2	1236.68	2.295e-05	3.33
[K].MSVQPTVSLGGFEITPPVVLR.[L]	1xTMT6plex [N-Term]	1	5	6	W5QIQ4	W5QIQ4 [81-101]	0	2456.38	21	2.29562e+07	2.02293e+07	2.36366e+07	2.57143e+07	3.18772e+07	2.55593e+07		2	1228.69	1.588e-09	5.89
[R].FAGGSLEMLQQMISK.[G]	1xTMT6plex [K15]; 1xTMT6plex [N-Term]	1	1	6	B6UV59	B6UV59 [611-625]	0	2098.14	15	9.06759e+06	8.70714e+06	9.53834e+06	1.23528e+07	1.34615e+07	1.34594e+07		2	1049.57	1.056e-08	5.82
[R].FAGGSLEMLQQMISK.[G]	1xDeamidated [Q11]; 1xTMT6plex [K15]; 1xTMT6plex [N-Term]	1	1	1	B6UV59	B6UV59 [611-625]	0	2099.13	15	1.04591e+06	962605	1.03796e+06	1.3039e+06	1.34394e+06	1.26646e+06		2	1050.07	0.0001032	3.66
[R].MSVIEEGDCK.[R]	1xCarbamidomethyl [C9]; 1xTMT6plex [K10]; 1xTMT6plex [N-Term]	2	2	5	W5PB77; Q5MIB6	W5PB77 [430-439]; Q5MIB6 [429-438]	0	1625.83	10	5.05941e+06	4.87416e+06	5364838	6.79177e+06	7.84068e+06	6.74248e+06	Shared	2	813.414	2.581e-05	2.97
[R].FAGLHFFNPVPLMK.[L]	1xTMT6plex [K14]; 1xTMT6plex [N-Term]	1	1	3	W5PEH2	W5PEH2 [166-179]	0	2076.19	14	2.23316e+06	1.87121e+06	2.41308e+06	3.48035e+06	2.79077e+06	2.71229e+06		3	692.732	6.626e-05	4.31
[R].FAHTNIESLVNK.[Y]	1xTMT6plex [K12]; 1xTMT6plex [N-Term]	1	2	3	C6JUQ0	C6JUQ0 [184-195]	0	1831.05	12	9.65163e+06	9.51564e+06	9.57385e+06	8.93873e+06	1.13839e+07	9.0721e+06		2	916.025	7.327e-06	2.96
[K].FAEIVEENLK.[S]	1xTMT6plex [K10]; 1xTMT6plex [N-Term]	1	1	4	W5NZQ2	W5NZQ2 [215-224]	0	1649.95	10	1.10994e+07	9.84492e+06	1.26895e+07	1.41177e+07	1.72037e+07	1.51847e+07		2	825.474	2.119e-05	4.17
[K].MTMSTVVLK.[A]	1xTMT6plex [K9]; 1xTMT6plex [N-Term]	1	1	2	W5P812	W5P812 [63-71]	0	1467.87	9	494101	461192	564428	654085	699540	729998		2	734.433	9.168e-05	2.62
[K].FATVEVTDKPVDEALR.[E]	1xTMT6plex [K9]; 1xTMT6plex [N-Term]	1	1	4	W5QI36	W5QI36 [41-56]	0	2248.26	16	4.70447e+06	4.39509e+06	5.41528e+06	5.30313e+06	6.14845e+06	5.74452e+06		2	1124.63	5.19e-08	4.43
[K].IEGYEDQVLITEHGDLGNGK.[F]	1xDeamidated [N/Q]; 1xTMT6plex [K20]; 1xTMT6plex [N-Term]	1	4	4	W5NPQ6	W5NPQ6 [57-76]	0	2646.37	20	587728	555004	683782	671936	803324	664341		3	882.792	2.269e-08	4.71
[K].MQPDQQVVINCAIVR.[G]	1xCarbamidomethyl [C11]; 1xTMT6plex [N-Term]	1	1	1	W5PK38	W5PK38 [56-70]	0	2000.06	15	582053	590131	657711	764073	919515	818637		2	1000.53	8.357e-07	4.18
[K].FDDENFILK.[H]	1xTMT6plex [K9]; 1xTMT6plex [N-Term]	2	8	11	W5QFW0; K4P1S5	W5QFW0 [234-242]; K4P1S5 [83-91]	0	1598.88	9	2.32453e+08	2.3169e+08	2.53271e+08	2.42378e+08	3.16644e+08	2.88476e+08	Shared	2	799.938	0.0001236	2.48
[R].FDDGAGGDNEVQR.[T]	1xTMT6plex [N-Term]	1	1	6	W5QCP6	W5QCP6 [324-336]	0	1608.75	13	4.38354e+06	2.72271e+06	4.43703e+06	3.4867e+06	4.16658e+06	3.81853e+06		2	804.876	2.155e-07	3.32
[R].MQNNTTDDETAEKEGK.[S]	2xTMT6plex [K13; K16]; 1xTMT6plex [N-Term]	1	2	3	W5PD77	W5PD77 [137-152]	1	2498.26	16	4.65123e+06	4.003e+06	5412847	3.2676e+06	4.23927e+06	3.70103e+06		3	833.429	2.465e-07	2.89
[R].MQNNTTDDETAEK.[E]	1xTMT6plex [K13]; 1xTMT6plex [N-Term]	1	2	12	W5PD77	W5PD77 [137-149]	0	1954.94	13	5.88592e+06	5.94047e+06	6.1828e+06	6.65665e+06	7.46373e+06	5.84793e+06		2	977.973	1.08e-07	3.9
[R].KELGLDEGVDNLK.[A]	2xTMT6plex [K1; K13]; 1xTMT6plex [N-Term]	1	1	1	W5PCB1	W5PCB1 [206-218]	1	2117.24	13	1.43729e+06	1.3959e+06	1.80196e+06	1.53847e+06	1.76838e+06	1.58881e+06		3	706.414	2.904e-06	2.58
[R].FDDTNPEKEEAK.[F]	2xTMT6plex [K8; K12]; 1xTMT6plex [N-Term]	1	1	4	W5Q0S2	W5Q0S2 [302-313]	1	2110.13	12	1.05298e+07	1.00999e+07	1.2729e+07	1.11064e+07	1.21749e+07	1.111e+07		3	704.047	4.376e-05	4.37
[K].MQMLEDEDDLAYAETEKK.[A]	2xTMT6plex [K17; K18]; 1xTMT6plex [N-Term]	1	1	2	W5NYP8	W5NYP8 [4328-4345]	1	2846.44	18	2.0046e+06	1.9268e+06	2.05551e+06	2.04102e+06	2.11122e+06	2.10641e+06		3	949.485	5.08e-08	4.57
[-].MQLKPMEINPEMLNK.[V]	2xTMT6plex [K4; K15]; 1xTMT6plex [N-Term]	1	1	1	W5PUL3	W5PUL3 [1-15]	0	2503.41	15	1.47028e+06	1.52126e+06	1652307	1.33877e+06	1.53599e+06	1.52948e+06		3	835.132	3.343e-05	3.71
[K].MQLEEQVLTVSSEIPK.[R]	1xTMT6plex [K16]; 1xTMT6plex [N-Term]	1	1	1	W5NZT2	W5NZT2 [86-101]	0	2289.28	16	371249	382110	543208	393996	417168	388959		3	763.759	1.574e-05	3.46
[R].MQLAQLCYNPDHEK.[L]	1xCarbamidomethyl [C7]; 1xDeamidated [N9]; 1xTMT6plex [K14]; 1xTMT6plex [N-Term]	1	2	2	W5QDF4	W5QDF4 [118-131]	0	2206.1	14	5.30835e+06	4.96376e+06	5804912	6.54084e+06	7.84397e+06	7.23933e+06		3	736.04	1.414e-05	3.99
[R].FDEILEASDGIMVAR.[G]	1xTMT6plex [N-Term]	1	1	2	W5QC41	W5QC41 [316-330]	0	1894.98	15	580098	531120	647536	733177	851626	787937		2	947.988	3.908e-06	2.78
[R].MQLAQLCYNPDHEK.[L]	1xCarbamidomethyl [C7]; 1xTMT6plex [K14]; 1xTMT6plex [N-Term]	1	2	5	W5QDF4	W5QDF4 [118-131]	0	2205.12	14	5.66056e+06	5.24419e+06	6.4303e+06	6.75327e+06	8.18725e+06	7.67733e+06		3	735.706	2.678e-05	3.8
[K].FDEYFSAGCAPGSQR.[N]	1xCarbamidomethyl [C9]; 1xTMT6plex [N-Term]	1	2	14	W5PF65	W5PF65 [499-513]	0	1920.87	15	3.04697e+07	2.07101e+07	3.34919e+07	1.68697e+07	1.78708e+07	1.50611e+07		2	960.936	2.181e-08	4
[K].MQHLNPDPQLVPEQITTDINPECLVSPR.[Y]	1xCarbamidomethyl [C23]; 1xDeamidated [Q14]; 1xTMT6plex [N-Term]	1	2	2	W5QIT6	W5QIT6 [498-525]	0	3471.74	28	424677	357589	495324	600591	646008	631485		3	1157.92	1.164e-08	4.33
[R].FDGALNVDLTEFQTNLVPYPR.[I]	1xTMT6plex [N-Term]	3	8	5	D0VWZ0; W5QC30; C5ISA2	D0VWZ0 [244-264]; W5QC30 [247-267]; C5ISA2 [244-264]	0	2638.37	21	3.23377e+06	3.10383e+06	3.57827e+06	4.085e+06	4.0326e+06	3.99452e+06	Shared	2	1319.68	5.414e-11	4.37
[R].FDGALNVDLTEFQTNLVPYPR.[I]	1xDeamidated [Q/N]; 1xTMT6plex [N-Term]	3	8	3	D0VWZ0; W5QC30; C5ISA2	D0VWZ0 [244-264]; W5QC30 [247-267]; C5ISA2 [244-264]	0	2639.36	21	582178	563459	633678	695343	666083	626925	Shared	2	1320.18	1.831e-07	3.68
[R].FDGALNVDLTEFQTNLVPYPR.[I]	2xDeamidated [N15; N/Q]; 1xTMT6plex [N-Term]	3	8	3	D0VWZ0; W5QC30; C5ISA2	D0VWZ0 [244-264]; W5QC30 [247-267]; C5ISA2 [244-264]	0	2640.34	21	1.5383e+06	1.34928e+06	1.7232e+06	1.79456e+06	1.71497e+06	1.60963e+06	Shared	3	880.783	1.837e-06	4.46
[K].FDGAVEAVAVR.[Q]	1xTMT6plex [N-Term]	1	1	2	W5QGG8	W5QGG8 [520-530]	0	1362.76	11	1.64763e+06	1.48648e+06	2.05886e+06	1.80208e+06	2.25498e+06	2.10321e+06		2	681.878	8.593e-05	3.27
[K].MQHLNPDPQLVPEQITTDINPECLVSPR.[Y]	1xCarbamidomethyl [C23]; 1xTMT6plex [N-Term]	1	2	1	W5QIT6	W5QIT6 [498-525]	0	3470.76	28	291374	260335	373336	466057	520263	512317		4	868.441	1.134e-05	2.78
[R].FDGLCQQAELR.[A]	1xCarbamidomethyl [C5]; 1xTMT6plex [N-Term]	1	1	1	W5P352	W5P352 [691-701]	0	1565.79	11	1.40105e+06	1.44201e+06	1.50886e+06	1.51306e+06	1.75315e+06	1.40787e+06		2	783.398	3.207e-05	3.99
[K].FDGILGMAYPR.[I]	1xTMT6plex [N-Term]	1	2	7	Q9MZS8	Q9MZS8 [168-178]	0	1468.78	11	1.89533e+07	18837217	2.05501e+07	2.03105e+07	2.20053e+07	2.045e+07		2	734.889	8.919e-06	2.14
[K].MQEVVANLQYDDGSGMK.[R]	1xTMT6plex [K17]; 1xTMT6plex [N-Term]	1	1	2	W5PQ34	W5PQ34 [1105-1121]	0	2343.17	17	2.23451e+06	1.31594e+06	1.76972e+06	1.41947e+06	1.53226e+06	1.33679e+06		3	781.724	4.279e-06	4.11
[R].FDDAVVQSDMK.[H]	1xOxidation [M10]; 1xTMT6plex [K11]; 1xTMT6plex [N-Term]	1	1	4	W5NPN4	W5NPN4 [78-88]	0	1728.89	11	3.67555e+06	3.40404e+06	5476011	3.94396e+06	4.35995e+06	3.63631e+06		2	864.946	1.838e-05	2.68
[R].FDDAVVQSDMK.[H]	1xTMT6plex [K11]; 1xTMT6plex [N-Term]	1	1	4	W5NPN4	W5NPN4 [78-88]	0	1712.89	11	7.10172e+06	6.4912e+06	7.95939e+06	7.98299e+06	9332125	8.39728e+06		2	856.951	5.675e-06	3.92
[R].MQQAEQALQDLLR.[E]	1xTMT6plex [N-Term]	1	3	1	W5NRI0	W5NRI0 [654-666]	0	1772.95	13	756551	781575	763569	1.09264e+06	1213215	1.11095e+06		2	886.973	8.454e-06	4.01
[R].MQQQLDEYQELLDIK.[L]	1xTMT6plex [K15]; 1xTMT6plex [N-Term]	1	1	8	W5P640	W5P640 [344-358]	0	2352.25	15	6.34627e+06	6.68062e+06	6.53628e+06	7.82569e+06	8.84316e+06	8.66706e+06		2	1176.63	1.384e-07	3.8
[R].MSEESYFESK.[T]	1xTMT6plex [K10]; 1xTMT6plex [N-Term]	1	1	3	W5NRF9	W5NRF9 [338-347]	0	1694.83	10	3.21155e+06	2.88557e+06	3.32892e+06	3.26884e+06	3.47799e+06	3.14428e+06		2	847.913	7.786e-05	2.8
[K].FCECDNFNCDR.[S]	3xCarbamidomethyl [C2; C4; C9]; 1xTMT6plex [N-Term]	1	2	9	B0FYY4	B0FYY4 [552-562]	0	1765.69	11	8.33166e+06	8.37195e+06	8.98544e+06	7.30426e+06	8.27108e+06	7.55532e+06		2	883.349	1.905e-05	3.15
[K].KEMQPTHPIR.[L]	1xTMT6plex [K1]; 1xTMT6plex [N-Term]	3	8	5	W5Q0Q1; W5QBD7; W5P303	W5Q0Q1 [159-168]; W5QBD7 [160-169]; W5P303 [196-205]	1	1694.98	10	6.92143e+06	3.96344e+06	5409155	5.65935e+06	6.24717e+06	6.08895e+06	Shared	3	565.659	1.737e-05	4.01
[R].FCEVIPGLNDTAENLLR.[T]	1xCarbamidomethyl [C2]; 1xTMT6plex [N-Term]	1	1	1	W5PQG6	W5PQG6 [247-263]	0	2190.14	17	1.18828e+06	1049561	1.50181e+06	1.34087e+06	1.56764e+06	1.3976e+06		2	1095.57	6.52e-06	2.75
[K].MSATFIGNSTAIQELFK.[R]	1xOxidation [M1]; 1xTMT6plex [K17]; 1xTMT6plex [N-Term]	3	4	3	W5NSS8; W5NUI0; D0VWY9	W5NSS8 [345-361]; W5NUI0 [289-305]; D0VWY9 [363-379]	0	2332.26	17	4.22404e+06	4.02076e+06	6.90881e+06	4.54182e+06	5.32003e+06	4.89493e+06	Shared	2	1166.63	9.768e-08	3.59
[K].FCFSNEFSTFTHK.[T]	1xCarbamidomethyl [C2]; 1xTMT6plex [K13]; 1xTMT6plex [N-Term]	1	1	3	W5Q4H1	W5Q4H1 [109-121]	0	2110.05	13	14019327	1.26828e+07	1.51056e+07	13385752	1.53629e+07	1.37122e+07		3	704.015	8.641e-05	2.91
[K].FCGVEDAVSEMTR.[Q]	1xCarbamidomethyl [C2]; 1xTMT6plex [N-Term]	1	2	8	W5PJN0	W5PJN0 [43-55]	0	1729.81	13	5.61247e+06	4.91033e+06	6.29978e+06	7.38799e+06	8.56791e+06	7.74265e+06		2	865.406	1.63e-07	3.93
[K].MSATFIGNSTAIQELFK.[R]	1xDeamidated [N/Q]; 1xTMT6plex [K17]; 1xTMT6plex [N-Term]	3	4	7	W5NSS8; W5NUI0; D0VWY9	W5NSS8 [345-361]; W5NUI0 [289-305]; D0VWY9 [363-379]	0	2317.25	17	9.49879e+06	8.86569e+06	1.07647e+07	1.08882e+07	1.2323e+07	1.21787e+07	Shared	2	1159.12	2.564e-09	5.51
[K].MSATFIGNSTAIQELFK.[R]	1xTMT6plex [K17]; 1xTMT6plex [N-Term]	3	4	10	W5NSS8; W5NUI0; D0VWY9	W5NSS8 [345-361]; W5NUI0 [289-305]; D0VWY9 [363-379]	0	2316.27	17	3.09541e+07	2.83466e+07	3.30897e+07	3.61135e+07	4.05111e+07	3.72189e+07	Shared	2	1158.63	2.189e-10	6.02
[R].MSASQLEALCPQVINAALALAAKPQSK.[L]	1xCarbamidomethyl [C10]; 1xDeamidated [Q12]; 2xTMT6plex [K23; K27]; 1xTMT6plex [N-Term]	1	1	1	W5Q5C7	W5Q5C7 [452-478]	0	3498.96	27	818705	831855	963786	1.00337e+06	1.02186e+06	1.03277e+06		3	1166.99	3.923e-10	4.62
[R].FCLEGMEESGSEGLDALIFAQK.[D]	1xCarbamidomethyl [C2]; 1xTMT6plex [K22]; 1xTMT6plex [N-Term]	1	1	2	W5P3I5	W5P3I5 [160-181]	0	2889.44	22	492468	421099	559210	587388	652000	624291		3	963.815	6.186e-06	4
[K].MSGGPEICQEYPGTLR.[R]	1xCarbamidomethyl [C8]; 1xTMT6plex [N-Term]	1	1	2	W5P9B0	W5P9B0 [669-684]	0	2023.98	16	3.17444e+06	3.70955e+06	3.39241e+06	5.09662e+06	5.28019e+06	4.27231e+06		2	1012.48	4.526e-07	4.35
[R].MSASQLEALCPQVINAALALAAKPQSK.[L]	1xCarbamidomethyl [C10]; 2xTMT6plex [K23; K27]; 1xTMT6plex [N-Term]	1	1	1	W5Q5C7	W5Q5C7 [452-478]	0	3497.98	27	568363	541342	636757	641815	730079	638590		4	875.242	3.304e-08	5.12
[R].FCIWTESAFR.[K]	1xCarbamidomethyl [C2]; 1xTMT6plex [N-Term]	1	2	3	W5Q9Z9	W5Q9Z9 [262-271]	0	1545.77	10	1.54413e+07	14265934	17031667	1.80128e+07	2.35038e+07	1.83529e+07		2	773.382	9.093e-05	3.06
[R].FCNGLTQIETLFK.[S]	1xCarbamidomethyl [C2]; 1xTMT6plex [K13]; 1xTMT6plex [N-Term]	2	3	4	W5NSF7; B6E3I6	W5NSF7 [35-47]; B6E3I6 [80-92]	0	2029.12	13	6.2916e+06	6028444	7.10851e+06	6.57154e+06	7.71769e+06	6.16592e+06	Shared	2	1015.05	6.801e-06	4
[R].MRPGVACSVSQAQK.[D]	1xCarbamidomethyl [C7]; 1xTMT6plex [K14]; 1xTMT6plex [N-Term]	2	2	2	W5Q3A0; W5NTE7	W5Q3A0 [127-140]; W5NTE7 [128-141]	0	1977.08	14	3.3798e+06	3.30064e+06	3.47238e+06	3.5909e+06	4.50287e+06	4.09231e+06	Shared	3	659.692	1.128e-05	4.2
[R].MREEVITLIR.[S]	1xTMT6plex [N-Term]	1	1	4	W5PU66	W5PU66 [945-954]	1	1488.88	10	3.87192e+06	3.82752e+06	4.54583e+06	4.56226e+06	5.76287e+06	5.161e+06		3	496.96	4.107e-05	3.82
[K].IEGYPDPEVVWFK.[D]	1xTMT6plex [K13]; 1xTMT6plex [N-Term]	1	2	5	W5QG43	W5QG43 [1846-1858]	0	2037.11	13	1.82528e+07	1.82982e+07	1.82462e+07	8.50321e+06	1.04375e+07	7.01824e+06		2	1019.05	1.615e-06	4.59
[R].MQVTELEDELTAAEDAK.[L]	1xTMT6plex [K17]; 1xTMT6plex [N-Term]	1	1	1	W5PWH2	W5PWH2 [1523-1539]	0	2351.21	17	47444	41016.1	53978	56338.1	73841.8	74416.2		3	784.409	9.986e-05	3.73
[R].FCVGDEVSMADLCLAPQVANADR.[F]	2xCarbamidomethyl [C2; C13]; 1xTMT6plex [N-Term]	1	2	1	W5NWM7	W5NWM7 [153-175]	0	2767.31	23	601866	584532	665693	748605	871037	835321		3	923.111	0.000118	3.35
[K].MQTQFTDAQK.[H]	1xTMT6plex [K10]; 1xTMT6plex [N-Term]	1	1	6	W5Q7Z7	W5Q7Z7 [554-563]	0	1655.88	10	1.97842e+07	2.14104e+07	1.95319e+07	3.29287e+07	3.86414e+07	3.55655e+07		2	828.441	6.842e-05	4.18
[K].MQTDKPFDQTTISLQMGTNK.[G]	2xTMT6plex [K5; K20]; 1xTMT6plex [N-Term]	1	1	2	W5Q7L1	W5Q7L1 [175-194]	0	2971.58	20	2353378	2.25554e+06	2.496e+06	3.61277e+06	3.69953e+06	3.64342e+06		3	991.195	2.601e-08	4.62
[R].MQQQLDEYQELLDIK.[L]	1xDeamidated [Q9]; 1xOxidation [M1]; 1xTMT6plex [K15]; 1xTMT6plex [N-Term]	1	1	1	W5P640	W5P640 [344-358]	0	2369.23	15	123604	117785	185624	109907	126678	119476		3	790.422	1.683e-05	2.77
[R].MQQQLDEYQELLDIK.[L]	1xOxidation [M1]; 1xTMT6plex [K15]; 1xTMT6plex [N-Term]	1	1	4	W5P640	W5P640 [344-358]	0	2368.25	15	1.31742e+06	1.3006e+06	1.75827e+06	1.35971e+06	1.51285e+06	1.3352e+06		3	790.085	1.695e-06	3.87
[K].IEGYEDQVLITEHGDLGNGK.[F]	2xDeamidated [Q7; N18]; 1xTMT6plex [K20]; 1xTMT6plex [N-Term]	1	4	2	W5NPQ6	W5NPQ6 [57-76]	0	2647.35	20	339903	293924	384265	403748	429485	387737		3	883.129	3.147e-05	2.96
[K].FADEHVPGSPFTVK.[I]	1xTMT6plex [K14]; 1xTMT6plex [N-Term]	1	1	6	W5PT68	W5PT68 [2113-2126]	0	1989.08	14	1.29336e+07	1.20181e+07	1.50256e+07	1.5816e+07	1.92842e+07	1.73001e+07		2	995.042	5.34e-05	3.67
[R].FADEAAMLEK.[L]	1xTMT6plex [K10]; 1xTMT6plex [N-Term]	1	1	6	W5NWU0	W5NWU0 [98-107]	0	1582.86	10	5.48851e+06	5.05694e+06	6.0256e+06	5.67039e+06	6.6975e+06	5.67853e+06		2	791.93	3.22e-05	3.4
[K].MTNGFSGADLTEICQR.[A]	1xCarbamidomethyl [C14]; 1xTMT6plex [N-Term]	1	1	3	W5PRJ4	W5PRJ4 [678-693]	0	2028.97	16	2.21625e+06	2.02259e+06	2.5442e+06	2.51399e+06	2.81045e+06	2.49082e+06		2	1014.98	1.814e-09	3.91
[K].NADPAELELIVPSPAFILAAESLPK.[I]	1xTMT6plex [K25]; 1xTMT6plex [N-Term]	1	1	8	W5QCP9	W5QCP9 [984-1008]	0	3063.74	25	1.7965e+07	1.94434e+07	1.65038e+07	1.72897e+07	1.93617e+07	1.72177e+07		2	1532.36	3.04e-09	4.68
[K].NADMSEEMQQDSVECATQALEK.[Y]	1xCarbamidomethyl [C15]; 1xDeamidated [Q]; 1xTMT6plex [K22]; 1xTMT6plex [N-Term]	1	1	2	W5PS90	W5PS90 [12-33]	0	2973.35	22	270956	265993	280030	391968	376816	342016		3	991.794	3.755e-06	4.22
[K].NADMSEEMQQDSVECATQALEK.[Y]	1xCarbamidomethyl [C15]; 1xTMT6plex [K22]; 1xTMT6plex [N-Term]	1	1	1	W5PS90	W5PS90 [12-33]	0	2972.37	22	130867	120787	134091	190765	179628	169479		3	991.462	2.895e-06	4.18
[K].NADMSEDMQQDAVDCATQAMEK.[Y]	1xCarbamidomethyl [C15]; 1xTMT6plex [K22]; 1xTMT6plex [N-Term]	1	1	1	W5PEV7	W5PEV7 [53-74]	0	2946.3	22	167271	166250	176748	217410	219491	202133		3	982.766	1.543e-08	5.83
[K].NADGYIDLEELK.[I]	1xTMT6plex [K12]; 1xTMT6plex [N-Term]	1	2	1	A0A1L2D5U0	A0A1L2D5U0 [107-118]	0	1837.99	12	320632	247972	852587	239118	197665	200137		2	919.503	2.698e-06	2.72
[R].EYFCWEGAFQHVGK.[A]	1xCarbamidomethyl [C4]; 1xTMT6plex [K14]; 1xTMT6plex [N-Term]	1	1	4	W5Q0L1	W5Q0L1 [536-549]	0	2216.1	14	1.19612e+07	1.14724e+07	1.41126e+07	1.47759e+07	1.84243e+07	1.76197e+07		3	739.368	9.718e-05	3.88
[R].EYFGEFGEIEAIELPMDPK.[S]	1xOxidation [M16]; 1xTMT6plex [K19]; 1xTMT6plex [N-Term]	1	1	2	W5P8K5	W5P8K5 [172-190]	0	2688.35	19	664676	597610	856433	699872	759856	736094		3	896.784	4.088e-06	4.53
[R].EYFGGFGEVESIELPMDNK.[T]	1xTMT6plex [K19]; 1xTMT6plex [N-Term]	1	2	6	W5NR04	W5NR04 [122-140]	0	2619.31	19	4.66032e+06	4.72081e+06	5.37955e+06	5.90801e+06	6.43843e+06	5.83514e+06		2	1310.15	1.249e-08	4.54
[R].EYFGGFGEVESIELPMDNK.[T]	1xOxidation [M16]; 1xTMT6plex [K19]; 1xTMT6plex [N-Term]	1	2	2	W5NR04	W5NR04 [122-140]	0	2635.3	19	2.46531e+06	1.96498e+06	3.22039e+06	2.16487e+06	2.33383e+06	2.29616e+06		3	879.099	2.385e-07	4.88
[R].NADGYIDAEELAEIFR.[A]	1xTMT6plex [N-Term]	1	1	4	A8WEG2	A8WEG2 [106-121]	0	2055.02	16	687391	280133	707395	247681	206219	233241		2	1028.01	2.916e-07	2.76
[K].NADEAIQFINER.[E]	1xTMT6plex [N-Term]	1	3	4	W5Q9L8	W5Q9L8 [344-355]	0	1648.85	12	2.5839e+06	2.47468e+06	2.86414e+06	3.6842e+06	4.44862e+06	4.13911e+06		2	824.926	1.375e-05	3.53
[K].EYGGLDVLVNNAGIAFK.[T]	1xTMT6plex [K17]; 1xTMT6plex [N-Term]	1	2	2	W5PW57	W5PW57 [80-96]	0	2238.25	17	1.46589e+06	1.26124e+06	1.6627e+06	1.82514e+06	1.81059e+06	1.70852e+06		3	746.751	7.183e-06	3.3
[K].EYGGLNVLVNNAGIAFK.[T]	1xDeamidated [N6]; 1xTMT6plex [K17]; 1xTMT6plex [N-Term]	1	1	1	W5PWG8	W5PWG8 [80-96]	0	2238.25	17	1.33492e+06	1.10783e+06	1.48656e+06	1.57936e+06	1.46468e+06	1.4142e+06		3	746.753	5.366e-05	3.4
[R].NAAQAEQDQDTAGWFDVLQK.[V]	1xTMT6plex [K20]; 1xTMT6plex [N-Term]	1	2	1	W5PXJ0	W5PXJ0 [1344-1363]	0	2693.36	20	360714	359282	425766	420509	477623	428857		3	898.456	1.578e-05	3.96
[R].NAAKDEIDSAVK.[M]	2xTMT6plex [K4; K12]; 1xTMT6plex [N-Term]	1	1	6	W5NVE5	W5NVE5 [40-51]	1	1948.13	12	1.2564e+07	11082598	1.37643e+07	1.25736e+07	1.49109e+07	1.36677e+07		3	650.047	2.283e-06	3.92
[R].EYLDIDQMIFDR.[E]	1xTMT6plex [N-Term]	1	1	3	W5P1J8	W5P1J8 [176-187]	0	1786.89	12	320427	298617	302056	426302	469144	417454		2	893.943	2.58e-05	3.07
[R].LEGGSGGDSEVQR.[T]	1xTMT6plex [N-Term]	1	1	13	W5PW97	W5PW97 [265-277]	0	1519.75	13	4.03787e+06	3.60077e+06	4.49273e+06	4.555e+06	5.23709e+06	5.02363e+06		2	760.381	1.599e-07	3.61
[R].KEVEGDDVPESIMLEMK.[A]	2xTMT6plex [K1; K17]; 1xTMT6plex [N-Term]	1	1	3	W5Q5S5	W5Q5S5 [578-594]	1	2636.41	17	1385091	1.34083e+06	1.5249e+06	1.75875e+06	1.69631e+06	1.67728e+06		3	879.477	6.609e-05	2.92
[R].IEGLLAAFPK.[L]	1xTMT6plex [K10]; 1xTMT6plex [N-Term]	1	1	8	W5PLQ6	W5PLQ6 [29-38]	0	1516.95	10	6.19315e+06	5.82473e+06	7.49769e+06	6.87105e+06	7.56385e+06	7.19647e+06		2	758.973	0.0001147	2.21
[K].EYLLGSTAEEK.[A]	1xTMT6plex [K11]; 1xTMT6plex [N-Term]	1	1	3	W5Q682	W5Q682 [58-68]	0	1697.94	11	1.44363e+06	1.34455e+06	1.57714e+06	1.50245e+06	1.62664e+06	1.57808e+06		2	849.465	7.808e-06	3.13
[K].EYILVEEAK.[L]	1xTMT6plex [K9]; 1xTMT6plex [N-Term]	1	1	4	W5Q1C9	W5Q1C9 [48-56]	0	1551.9	9	3.37642e+06	2.78476e+06	4.38431e+06	2.21649e+06	2.53022e+06	2.17002e+06		2	776.455	0.0001166	3.3
[K].EYLPIGGLAEFCK.[A]	1xCarbamidomethyl [C12]; 1xTMT6plex [K13]; 1xTMT6plex [N-Term]	1	1	2	W5NUG0	W5NUG0 [95-107]	0	1955.07	13	2.36068e+06	2.23068e+06	2.68103e+06	2.90959e+06	3.19835e+06	2.77616e+06		2	978.034	1.587e-06	3.87
[R].MYAPAWVAPEALQK.[K]	1xTMT6plex [K14]; 1xTMT6plex [N-Term]	1	2	2	H9CH14	H9CH14 [350-363]	0	2033.13	14	1601551	1.59666e+06	1.67733e+06	1.64797e+06	1.81557e+06	1.77248e+06		2	1017.06	1.538e-05	3.59
[K].EYELLSDELNQK.[S]	1xTMT6plex [K12]; 1xTMT6plex [N-Term]	1	1	3	W5PVU0	W5PVU0 [515-526]	0	1939.04	12	666204	598657	801475	814483	833936	770662		2	970.024	4.268e-07	3.41
[R].NAEALAELSESLR.[N]	1xTMT6plex [N-Term]	1	1	2	W5NW56	W5NW56 [263-275]	0	1631.88	13	805396	796674	954692	823757	965715	861714		2	816.443	5.513e-07	3.58
[R].NAEALEELSR.[E]	1xTMT6plex [N-Term]	1	1	6	W5NWM5	W5NWM5 [78-87]	0	1360.73	10	1.39337e+06	1.27814e+06	1.61364e+06	1.40108e+06	1.5806e+06	1.47905e+06		2	680.867	5.051e-05	3.5
[R].NAEAMQQGPGLSGK.[V]	1xTMT6plex [K14]; 1xTMT6plex [N-Term]	1	1	1	W5NR09	W5NR09 [843-856]	0	1845.99	14	1.03742e+06	946814	1.00351e+06	950925	1.054e+06	976381		2	923.496	3.028e-06	4.5
[K].NAIANASTLAEVER.[L]	1xTMT6plex [N-Term]	1	2	6	B2LU27	B2LU27 [206-219]	0	1687.92	14	4.08026e+06	3.87095e+06	4.6609e+06	4.20714e+06	4.9742e+06	4.69728e+06		2	844.462	5.198e-09	3.75
[K].NAGVEGSLIVEK.[I]	1xDeamidated [N1]; 1xTMT6plex [K12]; 1xTMT6plex [N-Term]	1	1	4	W5Q1L2	W5Q1L2 [482-493]	0	1674.97	12	1.84156e+06	1.56377e+06	2.0928e+06	1.74915e+06	2.14937e+06	1.9024e+06		2	837.986	0.0001265	1.75
[R].EWLSQSAYTCQVEHNK.[E]	1xCarbamidomethyl [C10]; 1xTMT6plex [K16]; 1xTMT6plex [N-Term]	1	1	2	W5NXW9	W5NXW9 [193-208]	0	2438.22	16	1.00078e+06	862441	1.19949e+06	1.99523e+06	2.05312e+06	1.67066e+06		3	813.41	5.606e-06	5.21
[K].NAGVEGSLIVEK.[I]	1xTMT6plex [K12]; 1xTMT6plex [N-Term]	1	1	11	W5Q1L2	W5Q1L2 [482-493]	0	1673.98	12	1.27636e+07	1.17842e+07	1.45839e+07	13251200	1.46264e+07	1.32571e+07		2	837.489	3.503e-07	3.99
[R].NAGTEQDLGIQYK.[A]	1xDeamidated [N/Q]; 1xTMT6plex [K13]; 1xTMT6plex [N-Term]	1	1	5	W5Q5C7	W5Q5C7 [166-178]	0	1896.01	13	2.73606e+06	2.68022e+06	2.92443e+06	2.62878e+06	2.95031e+06	3.35727e+06		2	948.508	3.914e-05	3.23
[R].NAGTEQDLGIQYK.[A]	1xTMT6plex [K13]; 1xTMT6plex [N-Term]	1	1	3	W5Q5C7	W5Q5C7 [166-178]	0	1895.03	13	2.55142e+06	2.30534e+06	2.54918e+06	2.91853e+06	3.28491e+06	3.1924e+06		2	948.011	4.557e-05	2.33
[K].EWNVLDTECR.[S]	1xCarbamidomethyl [C9]; 1xTMT6plex [N-Term]	1	2	1	W5PUF4	W5PUF4 [682-691]	0	1550.75	10	517154	535695	487657	277325	297729	267137		2	775.879	4.795e-05	3.55
[R].NAGMETPSGVCAALAAAR.[V]	1xCarbamidomethyl [C11]; 1xTMT6plex [N-Term]	1	5	1	A0A286SF73	A0A286SF73 [230-247]	0	1975.99	18	534303	486798	521118	604997	687857	630040		2	988.494	6.464e-07	3.63
[R].NAFACFDEEATGTIQEDYLR.[E]	1xCarbamidomethyl [C5]; 1xTMT6plex [N-Term]	1	3	2	W5PKY9	W5PKY9 [105-124]	0	2579.19	20	199239	172541	201959	198936	244489	221058		3	860.403	0.0001085	1.51
[R].EWTDGLFTHVLR.[K]	1xTMT6plex [N-Term]	1	1	4	W5NYP8	W5NYP8 [2274-2285]	0	1702.91	12	3.53325e+06	3.33161e+06	4.13389e+06	4.35157e+06	4.7737e+06	4.44055e+06		3	568.305	0.0001111	4.82
[R].EWTQPENLDLLEVR.[V]	1xTMT6plex [N-Term]	1	1	5	D8X187	D8X187 [256-269]	0	1971.04	14	1.2021e+06	1.02312e+06	1.40309e+06	1.31961e+06	1.45063e+06	1.3948e+06		2	986.023	4.129e-07	3.99
[K].IEGLQSLVNLR.[E]	1xTMT6plex [N-Term]	1	1	3	W5Q9D0	W5Q9D0 [227-237]	0	1470.88	11	4626746	4.15145e+06	5.19385e+06	4.98717e+06	5.90249e+06	5.76104e+06		2	735.938	1.084e-05	3.3
[K].EWVNLNHPVLLEDPVLSAIAK.[K]	1xTMT6plex [K21]; 1xTMT6plex [N-Term]	1	1	5	W5PMM4	W5PMM4 [226-246]	0	2815.61	21	5.56042e+06	5.4582e+06	6.84178e+06	5.52764e+06	6.15843e+06	5.85501e+06		3	939.203	1.447e-08	6.33
[R].NAFACFDEEASGFIHEDHLR.[E]	1xCarbamidomethyl [C5]; 1xDeamidated [N1]; 1xTMT6plex [N-Term]	1	1	1	W5Q2S8	W5Q2S8 [245-264]	0	2595.18	20	172609	203555	189653	142795	150919	134728		4	649.551	8.177e-05	3.84
[R].NAFACFDEEASGFIHEDHLR.[E]	1xCarbamidomethyl [C5]; 1xTMT6plex [N-Term]	1	1	2	W5Q2S8	W5Q2S8 [245-264]	0	2594.19	20	269193	282628	300689	247588	254854	226110		4	649.3	5.137e-07	5.21
[K].KEVVEEAENGR.[E]	1xDeamidated [N9]; 1xTMT6plex [K1]; 1xTMT6plex [N-Term]	1	1	15	W5QHS1	W5QHS1 [55-65]	1	1718.93	11	1.30434e+07	1.25063e+07	1.39646e+07	1.12623e+07	1.47512e+07	1.01784e+07		2	859.963	1.525e-05	2.81
[K].NAEQAVTQLK.[V]	1xTMT6plex [K10]; 1xTMT6plex [N-Term]	1	2	1	W5QIX0	W5QIX0 [478-487]	0	1559.92	10	1.36836e+06	1.21336e+06	1471513	1.42966e+06	1.76599e+06	1.46371e+06		2	780.46	8.844e-05	3.75
[K].NAEPLINLDVNNPDFK.[A]	1xTMT6plex [K16]; 1xTMT6plex [N-Term]	1	1	2	W5QHQ1	W5QHQ1 [102-117]	0	2271.24	16	2.29095e+06	2.04682e+06	2.58894e+06	2.15293e+06	2.76782e+06	2.31685e+06		2	1136.11	2.609e-07	4.53
[R].NAENAIEALKEYEPEMGK.[V]	2xTMT6plex [K10; K18]; 1xTMT6plex [N-Term]	2	5	1	W5Q3Y9; W5NVR5	W5Q3Y9 [127-144]; W5NVR5 [130-147]	1	2723.45	18	1.96172e+06	1.1672e+06	1.94053e+06	943010	1.22086e+06	1.02998e+06	Shared	3	908.485	5.477e-10	5.25
[R].NAENAIEALK.[E]	1xDeamidated [N1]; 1xTMT6plex [K10]; 1xTMT6plex [N-Term]	2	5	3	W5Q3Y9; W5NVR5	W5Q3Y9 [127-136]; W5NVR5 [130-139]	0	1531.87	10	1.00436e+06	844378	1.09842e+06	814457	1.03083e+06	872233	Shared	2	766.439	0.0001252	2.64
[R].NAENAIEALK.[E]	1xTMT6plex [K10]; 1xTMT6plex [N-Term]	2	5	5	W5Q3Y9; W5NVR5	W5Q3Y9 [127-136]; W5NVR5 [130-139]	0	1530.89	10	1.13401e+07	8.52063e+06	1.37461e+07	9.16118e+06	1.07789e+07	9.37751e+06	Shared	2	765.944	3.679e-05	4.39
[K].EYEATLEDCCAK.[DE]	2xCarbamidomethyl [C9; C10]; 1xTMT6plex [K12]; 1xTMT6plex [N-Term]	2	2	93	W5PWE9; P14639	W5PWE9 [375-386]; P14639 [375-386]	0	1946.92	12	3.36953e+08	2.15637e+08	3.41461e+08	3.18328e+08	3.38758e+08	2.63125e+08	Shared	2	973.963	1.477e-07	4.04
[K].EYEATLEDCCAKDDPHACYATVFDK.[L]	3xCarbamidomethyl [C9; C10; C18]; 2xTMT6plex [K12; K25]; 1xTMT6plex [N-Term]	1	1	2	W5PWE9	W5PWE9 [375-399]	1	3695.73	25	1.03163e+06	569203	1.0146e+06	844375	832025	802499		4	924.686	1.782e-05	4.27
[K].EYEDLLASVR.[A]	1xTMT6plex [N-Term]	1	1	1	W5NWH4	W5NWH4 [373-382]	0	1423.76	10	321807	269343	341151	361589	435685	393803		2	712.387	0.0001043	2.67
[K].EWYQTCSNNGLVAGFQSR.[Y]	1xCarbamidomethyl [C6]; 1xDeamidated [N/Q]; 1xTMT6plex [N-Term]	1	1	8	W5PHI8	W5PHI8 [101-118]	0	2347.1	18	8.40522e+06	7.78267e+06	8.27164e+06	9.42235e+06	1.00873e+07	9.20977e+06		2	1174.05	1.659e-09	5.12
[K].MWEVLESTTQTK.[A]	1xTMT6plex [K12]; 1xTMT6plex [N-Term]	1	1	7	W5NZX9	W5NZX9 [1361-1372]	0	1911.03	12	8.60312e+06	8.3136e+06	9.51065e+06	9.62331e+06	1.12707e+07	9.6463e+06		2	956.013	2.881e-06	3.28
[K].MWEELPEVVR.[Q]	1xTMT6plex [N-Term]	1	1	4	W5QGP1	W5QGP1 [261-270]	0	1516.8	10	4.04373e+06	3.4612e+06	4.46348e+06	4.49983e+06	5.32438e+06	5.21079e+06		2	758.901	0.0001093	2.35
[K].MWDLNSNQAIQIAQHDAPVK.[T]	1xDeamidated [Q11]; 1xTMT6plex [K20]; 1xTMT6plex [N-Term]	1	2	1	W5Q988	W5Q988 [112-131]	0	2738.43	20	754875	728070	914004	909611	981478	896342		3	913.483	3.496e-06	4.42
[R].MVNHFIAEFK.[R]	1xTMT6plex [K10]; 1xTMT6plex [N-Term]	1	1	11	W5NPN4	W5NPN4 [238-247]	0	1693.95	10	4.75295e+07	4.45923e+07	5.03089e+07	5.43824e+07	6.8495e+07	5.95658e+07		2	847.474	4.628e-05	4.01
[R].LEGNPIILGK.[H]	1xTMT6plex [K10]; 1xTMT6plex [N-Term]	1	1	11	W5PEL2	W5PEL2 [273-282]	0	1511.96	10	1.98272e+08	2.1478e+08	1.70286e+08	1.61501e+08	2.06174e+08	1.6579e+08		2	756.475	1.885e-05	3.55
[R].LEGNTVGVEAAR.[V]	1xTMT6plex [N-Term]	1	1	3	W5Q9T2	W5Q9T2 [97-108]	0	1444.8	12	1359194	1.11518e+06	1.60194e+06	1.3262e+06	1.46845e+06	1.20636e+06		2	722.899	1.628e-06	3.68
[K].MVLENFGGDGHAR.[G]	1xOxidation [M1]; 1xTMT6plex [N-Term]	1	1	1	W5Q5H8	W5Q5H8 [262-274]	0	1647.81	13	693146	634288	763314	668732	777411	672926		3	549.943	4.951e-05	4.42
[K].MVLENFGGDGHAR.[G]	1xDeamidated [N5]; 1xTMT6plex [N-Term]	1	1	1	W5Q5H8	W5Q5H8 [262-274]	0	1632.8	13	232689	198969	223471	269563	306490	255250		3	544.935	5.118e-05	3.41
[K].EYVNAGEVSSR.[K]	1xTMT6plex [N-Term]	1	1	4	W5PDY8	W5PDY8 [574-584]	0	1439.73	11	1.09856e+06	955441	1.17609e+06	1.33016e+06	1.33211e+06	1.1764e+06		2	720.368	6.483e-05	2.33
[K].EYVNAGEVSSR.[K]	1xDeamidated [N4]; 1xTMT6plex [N-Term]	1	1	3	W5PDY8	W5PDY8 [574-584]	0	1440.72	11	592538	492843	567524	621804	660372	558619		2	720.86	0.0001034	2.54
[K].MVLENFGGDGHAR.[G]	1xTMT6plex [N-Term]	1	1	10	W5Q5H8	W5Q5H8 [262-274]	0	1631.82	13	1.83141e+07	1.75085e+07	20241685	2.20621e+07	2.7571e+07	2.44184e+07		2	816.407	0.0001268	3.12
[R].MVLAAAGGLEHR.[Q]	1xTMT6plex [N-Term]	1	1	4	W5Q5G6	W5Q5G6 [229-240]	0	1453.81	12	7.92211e+06	7.28694e+06	9.63011e+06	9.06068e+06	1.0407e+07	1.03246e+07		3	485.274	7.527e-07	4.73
[K].EYYEALPELK.[L]	1xTMT6plex [K10]; 1xTMT6plex [N-Term]	1	3	6	Q5MIB5	Q5MIB5 [731-740]	0	1712.95	10	3.59505e+06	3.42447e+06	4.0259e+06	4.96901e+06	5.22738e+06	4.79279e+06		2	856.978	7.088e-05	3.26
[R].MVELEDLFQALNNK.[N]	1xTMT6plex [K14]; 1xTMT6plex [N-Term]	1	1	1	W5P2Y4	W5P2Y4 [106-119]	0	2122.16	14	2712980	2697105	3.1385e+06	4545013	5.70603e+06	4676948		2	1061.58	6.616e-06	4.72
[K].EYSVLNAIDQAR.[V]	1xTMT6plex [N-Term]	1	2	1	W5NUY7	W5NUY7 [2618-2629]	0	1607.86	12	713180	567400	821566	649009	754784	653614		2	804.432	5.973e-06	3.08
[K].FAAATGATPIAGR.[F]	1xTMT6plex [N-Term]	1	3	6	D5HKJ4	D5HKJ4 [90-102]	0	1432.81	13	9.3686e+06	8.90422e+06	1.0333e+07	9.53008e+06	1.1082e+07	1.01398e+07		2	716.907	1.155e-05	3.24
[K].MTVCLETENK.[S]	1xCarbamidomethyl [C4]; 1xTMT6plex [K10]; 1xTMT6plex [N-Term]	1	2	1	W5Q634	W5Q634 [201-210]	0	1682.89	10	981382	1.02033e+06	1.09399e+06	1.41474e+06	1.63933e+06	1.55412e+06		2	841.939	0.0001078	3.1
[R].MTTVSSEEGK.[Q]	1xTMT6plex [K10]; 1xTMT6plex [N-Term]	1	1	2	W5PZI9	W5PZI9 [38-47]	0	1526.81	10	4220833	3.73848e+06	4.43688e+06	4.01315e+06	4.45608e+06	4.40404e+06		2	763.907	8.285e-05	4.07
[K].MTTETASEDDNFGTAQSNK.[A]	1xDeamidated [N11]; 1xTMT6plex [K19]; 1xTMT6plex [N-Term]	1	1	1	W5PNV5	W5PNV5 [1855-1873]	0	2506.17	19	126971	143060	158540	132647	139930	133669		3	836.065	2.975e-05	2.43
[K].MTTETASEDDNFGTAQSNK.[A]	1xTMT6plex [K19]; 1xTMT6plex [N-Term]	1	1	5	W5PNV5	W5PNV5 [1855-1873]	0	2505.18	19	1.87736e+06	1.9889e+06	2.06611e+06	1.78176e+06	1.89775e+06	1.66137e+06		3	835.727	2.953e-06	2.96
[K].MTSTPETLLEEIEAK.[N]	1xTMT6plex [K15]; 1xTMT6plex [N-Term]	1	2	1	W5PDD3	W5PDD3 [128-142]	0	2150.17	15	219433	207096	231935	245177	278645	253625		2	1075.58	2.839e-05	2.79
[K].MTNYDVEHTIK.[K]	1xTMT6plex [K11]; 1xTMT6plex [N-Term]	1	1	3	W5PEC3	W5PEC3 [649-659]	0	1808.96	11	4.36046e+06	4.08699e+06	4.36508e+06	4.38234e+06	4.80687e+06	4.37782e+06		2	904.978	9.49e-06	3.22
[R].FAAYFQQGDMESNGK.[Y]	1xDeamidated [N13]; 1xTMT6plex [K15]; 1xTMT6plex [N-Term]	1	1	4	W5P323	W5P323 [348-362]	0	2152.04	15	4.65372e+06	4.10356e+06	4.35398e+06	4.53542e+06	4.91145e+06	4.31471e+06		2	1076.52	1.206e-05	3.89
[K].MTNTAENTPAILDTK.[D]	1xTMT6plex [K15]; 1xTMT6plex [N-Term]	1	1	1	W5PNC9	W5PNC9 [315-329]	0	2078.12	15	1.13302e+06	1091059	1.21181e+06	1.44658e+06	1.83128e+06	1372247		2	1039.56	7.554e-08	5.43
[K].IEGTPLETVQEK.[L]	1xTMT6plex [K12]; 1xTMT6plex [N-Term]	1	1	3	W5Q5T4	W5Q5T4 [24-35]	0	1802.03	12	4.66066e+06	4.26515e+06	5519276	5.24066e+06	6.17758e+06	5.61891e+06		2	901.52	7.914e-05	4.01
[K].FACNGTVIEHPEYGEVIQLQGDQR.[K]	1xCarbamidomethyl [C3]; 2xDeamidated [N4; Q18]; 1xTMT6plex [N-Term]	1	2	4	W5Q7J3	W5Q7J3 [67-90]	0	2991.44	24	1.22694e+06	1.05669e+06	1.47149e+06	1.28636e+06	1.40941e+06	1.31141e+06		3	997.817	7.503e-07	4.97
[K].MTNGFSGADLTEICQR.[A]	1xCarbamidomethyl [C14]; 1xDeamidated [N3]; 1xTMT6plex [N-Term]	1	1	14	W5PRJ4	W5PRJ4 [678-693]	0	2029.95	16	1.12312e+07	1.07114e+07	1.24974e+07	1.18243e+07	1.32642e+07	1.31488e+07		2	1015.48	4.051e-09	4.29
[R].MTVDEHGQLVSCSMDDTVR.[Y]	1xCarbamidomethyl [C12]; 1xTMT6plex [N-Term]	1	1	3	W5PDL1	W5PDL1 [406-424]	0	2409.1	19	3.53519e+06	658346	1.30587e+06	317616	619889	4.05155e+06		3	803.701	6.167e-05	2.94
[K].EWLEGEDLSEELKK.[E]	2xTMT6plex [K13; K14]; 1xTMT6plex [N-Term]	1	1	1	W5P272	W5P272 [1018-1031]	1	2392.32	14	1.08213e+06	928458	1.15024e+06	1.05055e+06	1.21906e+06	1.08063e+06		3	798.11	4.259e-08	3.85
[R].MVNNGHSFNVEFDDSQDK.[A]	1xDeamidated [N]; 1xTMT6plex [K18]; 1xTMT6plex [N-Term]	2	2	11	W5PTU7; P00922	W5PTU7 [62-79]; P00922 [59-76]	0	2542.19	18	2.07652e+07	1.68489e+07	2.02588e+07	2.51168e+07	2.89121e+07	27640613	Shared	3	848.064	1.589e-06	4.77
[R].MVNNGHSFNVEFDDSQDK.[A]	2xDeamidated [N4; N9]; 1xOxidation [M1]; 1xTMT6plex [K18]; 1xTMT6plex [N-Term]	2	2	3	W5PTU7; P00922	W5PTU7 [62-79]; P00922 [59-76]	0	2559.17	18	999978	794173	1.13717e+06	1.19339e+06	1.4057e+06	1.2561e+06	Shared	3	853.733	2.83e-05	4.76
[K].MWDLNSNQAIQIAQHDAPVK.[T]	1xTMT6plex [K20]; 1xTMT6plex [N-Term]	1	2	2	W5Q988	W5Q988 [112-131]	0	2737.45	20	1.54889e+06	1.50072e+06	1.87776e+06	1800982	1.97334e+06	1.80135e+06		3	913.148	5.432e-08	4.57
[R].MVYWTDVAGR.[T]	1xTMT6plex [N-Term]	1	1	4	W5QHQ8	W5QHQ8 [1194-1203]	0	1426.74	10	11940067	12912787	13163942	1.33943e+07	1.44706e+07	1.31616e+07		2	713.87	0.0001174	2.86
[R].MVVPVAALFTPLR.[E]	1xTMT6plex [N-Term]	1	1	1	W5PF11	W5PF11 [34-46]	0	1642.99	13	695877	684954	816975	683722	668639	636482		2	821.993	1.441e-06	3.62
[K].KETKPEPMEENLPENKK.[K]	2xDeamidated [N11; N15]; 4xTMT6plex [K1; K4; K16; K17]; 1xTMT6plex [N-Term]	1	1	1	W5NW66	W5NW66 [195-211]	2	3188.81	17	673375	584636	797318	762527	892245	800504		5	638.569	7.596e-06	3.29
[R].EYQELMNIK.[L]	1xTMT6plex [K9]; 1xTMT6plex [N-Term]	2	2	9	W5Q6V2; W5Q6E8	W5Q6V2 [361-369]; W5Q6E8 [382-390]	0	1625.9	9	5.68118e+07	5.20677e+07	5.51109e+07	5.61549e+07	6.44932e+07	5.62025e+07	Shared	2	813.449	6.233e-05	2.66
[K].MVVESAYEVIK.[L]	1xTMT6plex [K11]; 1xTMT6plex [N-Term]	1	1	17	W5QGD1	W5QGD1 [237-247]	0	1725.99	11	3.08776e+07	2.755e+07	3.46652e+07	3.48763e+07	4.15383e+07	37200257		2	863.491	1.453e-06	5.18
[R].EYQELMNTK.[L]	1xTMT6plex [K9]; 1xTMT6plex [N-Term]	2	2	23	W5Q6V9; W5Q687	W5Q6V9 [337-345]; W5Q687 [431-439]	0	1613.86	9	2.89706e+08	2.91714e+08	2.81008e+08	5.00125e+08	5.26819e+08	4.96348e+08	Shared	2	807.429	3.08e-05	3.54
[R].EYQELMNTK.[L]	1xDeamidated [N/Q]; 1xTMT6plex [K9]; 1xTMT6plex [N-Term]	2	2	43	W5Q6V9; W5Q687	W5Q6V9 [337-345]; W5Q687 [431-439]	0	1614.84	9	4.60473e+07	4.26494e+07	4.93408e+07	6.55718e+07	6.80647e+07	6.92743e+07	Shared	2	807.926	9.581e-05	3.08
[R-].MVTGDNINTAR.[A]	1xTMT6plex [N-Term]	2	7	2	W5Q289; W5Q3L8	W5Q289 [706-716]; W5Q3L8 [255-265]	0	1420.74	11	3.04488e+06	2928729	3224328	4.10547e+06	4842997	4.51566e+06	Shared	2	710.874	7.085e-05	2.84
[KR].EYQELMNVK.[L]	1xTMT6plex [K9]; 1xTMT6plex [N-Term]	6	7	11	W5Q6D3; W5Q6J4; W5Q5N9; W5Q6G0; W5Q6B8; W5Q5X7	W5Q6D3 [448-456]; W5Q6J4 [439-447]; W5Q5N9 [368-376]; W5Q6G0 [425-433]; W5Q6B8 [427-435]; W5Q5X7 [434-442]	0	1611.88	9	2.69266e+07	2.36099e+07	2.79085e+07	4.17775e+07	4.63287e+07	4.54049e+07	Shared	2	806.44	9.756e-05	3.49
[R].MVSSYVGENAEFER.[Q]	1xTMT6plex [N-Term]	1	1	6	W5PGM1	W5PGM1 [111-124]	0	1846.88	14	2578457	2.42127e+06	2.8136e+06	3.19224e+06	3.29603e+06	3.23133e+06		2	923.939	1.44e-06	4.47
[R].KESYSVYVYK.[V]	2xTMT6plex [K1; K10]; 1xTMT6plex [N-Term]	1	12	7	W5Q9Y2	W5Q9Y2 [35-44]	1	1953.13	10	6.47758e+07	6.42404e+07	57436261	4.98456e+07	4.50946e+07	4.14114e+07		3	651.708	5.689e-05	4.28
[R].MVSHLAEEFK.[R]	1xTMT6plex [K10]; 1xTMT6plex [N-Term]	1	1	5	W5NSB0	W5NSB0 [240-249]	0	1648.91	10	1.15532e+07	1.13788e+07	1.26819e+07	1.5357e+07	18825434	1.68659e+07		2	824.956	0.0001263	4.2
[K].MVSDINSGWQHLEQAEK.[G]	1xDeamidated [Q/N]; 1xTMT6plex [K17]; 1xTMT6plex [N-Term]	1	2	2	W5P707	W5P707 [348-364]	0	2431.23	17	3.06741e+06	2.76234e+06	4.07467e+06	4.87004e+06	4.93914e+06	4.70161e+06		3	811.082	2.22e-05	4.53
[K].EYQEVMNSK.[L]	1xTMT6plex [K9]; 1xTMT6plex [N-Term]	7	17	24	P15241; E3VW87; W5Q6H2; Q4U200; W5Q6A0; Q28582; P25691	P15241 [391-399]; E3VW87 [388-396]; W5Q6H2 [400-408]; Q4U200 [55-63]; W5Q6A0 [407-415]; Q28582 [389-397]; P25691 [404-412]	0	1585.83	9	4.17339e+08	3.37948e+08	3.80665e+08	4.90717e+08	5.08583e+08	4.05945e+08	Shared	2	793.413	6.333e-05	2.81
[K].EYQEVMNSK.[L]	1xDeamidated [N/Q]; 1xTMT6plex [K9]; 1xTMT6plex [N-Term]	7	17	46	P15241; E3VW87; W5Q6H2; Q4U200; W5Q6A0; Q28582; P25691	P15241 [391-399]; E3VW87 [388-396]; W5Q6H2 [400-408]; Q4U200 [55-63]; W5Q6A0 [407-415]; Q28582 [389-397]; P25691 [404-412]	0	1586.81	9	6.63629e+07	5.13868e+07	6.54293e+07	8.09692e+07	82199401	8.00601e+07	Shared	2	793.91	4.697e-05	3.07
[K].MVSDINSGWQHLEQAEK.[G]	1xTMT6plex [K17]; 1xTMT6plex [N-Term]	1	2	2	W5P707	W5P707 [348-364]	0	2430.25	17	1.08245e+07	10861963	10376404	1.46458e+07	16724298	15365756		3	810.746	9.82e-05	1.74
[R].MVRPNQDGTLIASCSNDQTVR.[V]	1xCarbamidomethyl [C14]; 1xTMT6plex [N-Term]	1	1	2	W5Q3A5	W5Q3A5 [239-259]	0	2591.29	21	1.71057e+06	1.74404e+06	1.84217e+06	1.98129e+06	2.18705e+06	1.90626e+06		3	864.43	1.564e-08	5.02
[K].MVQTPYGIVPDVYEK.[E]	1xTMT6plex [K15]; 1xTMT6plex [N-Term]	1	1	2	W5P195	W5P195 [173-187]	0	2197.2	15	2.49812e+06	2.0731e+06	2.26652e+06	2.09738e+06	2.10952e+06	2.07146e+06		2	1099.09	2.695e-06	3.81
[R].EYQLNDSAAYYLNDLER.[I]	1xTMT6plex [N-Term]	1	2	5	W5PKD3	W5PKD3 [146-162]	0	2306.11	17	847024	815149	827534	948536	890993	861988		2	1153.56	6.639e-08	3.7
[R].MVQEQCCHNQLEELHCATGINLANEQDSCTAPR.[G]	4xCarbamidomethyl [C6; C7; C16; C29]; 1xTMT6plex [N-Term]	1	1	1	W5QDP8	W5QDP8 [56-88]	0	4142.84	33	210881	175901	195001	230563	220295	202403		4	1036.46	4.785e-10	9.29
[R].EYQLNDSASYYLNDLDR.[I]	1xTMT6plex [N-Term]	1	1	4	W5QD75	W5QD75 [108-124]	0	2308.09	17	689932	647638	651498	743242	762924	697444		2	1154.55	1.287e-06	2.82
[R].LEGLTDEINFYR.[Q]	1xTMT6plex [N-Term]	1	1	4	W5Q5N9	W5Q5N9 [209-220]	0	1698.89	12	1.31174e+07	1.11732e+07	1.54243e+07	1.48177e+07	1.56651e+07	1.49605e+07		2	849.943	8.002e-07	4.33
[K].MVPVSVQQSLAAYNQR.[K]	1xTMT6plex [N-Term]	1	1	2	W5Q3T9	W5Q3T9 [358-373]	0	2020.08	16	3.2566e+06	2810139	3.46325e+06	3.33423e+06	3.7535e+06	3.55961e+06		2	1010.54	1.781e-06	3.47
[K].MVSGFIPLKPTVK.[M]	2xTMT6plex [K9; K13]; 1xTMT6plex [N-Term]	1	1	6	W5NSA6	W5NSA6 [1389-1401]	0	2104.32	13	1.13426e+07	9.42849e+06	1.21384e+07	1.91921e+07	1.87391e+07	1.62978e+07		3	702.104	2.415e-06	3.87
[K].NLTEEMAGLDETIAK.[L]	1xOxidation [M6]; 1xTMT6plex [K15]; 1xTMT6plex [N-Term]	2	2	5	W5PPG6; W5PT09	W5PPG6 [981-995]; W5PT09 [979-993]	0	2109.11	15	1.70981e+06	1.41946e+06	2.77212e+06	1.89732e+06	2.08749e+06	1.95247e+06	Shared	3	703.708	6.525e-05	3.67
[K].EVEERPAPTPWGSK.[M]	1xTMT6plex [K14]; 1xTMT6plex [N-Term]	1	1	2	W5QBL7	W5QBL7 [175-188]	0	2041.11	14	3714179	3.25864e+06	3.91289e+06	4.48879e+06	5346964	4.97917e+06		2	1021.06	2.102e-05	2.45
[R].EVEENGIVLDPLK.[A]	1xDeamidated [N5]; 1xTMT6plex [K13]; 1xTMT6plex [N-Term]	1	1	1	W5Q5K0	W5Q5K0 [381-393]	0	1914.08	13	111786	93542.9	129157	133270	135761	128270		2	957.549	8.585e-05	1.86
[K].NIFNEDTSDFSGMSETK.[G]	1xTMT6plex [K17]; 1xTMT6plex [N-Term]	1	1	6	W5P8T8	W5P8T8 [307-323]	0	2380.14	17	1.17903e+07	1.03325e+07	1.26075e+07	1.71443e+07	1.99307e+07	1.892e+07		2	1190.57	1.199e-08	4.63
[K].NLFFSTNIDDAIK.[E]	1xTMT6plex [K13]; 1xTMT6plex [N-Term]	1	1	2	W5PQL0	W5PQL0 [68-80]	0	1956.08	13	3.20873e+06	2.84471e+06	3.85492e+06	3.47356e+06	4.23632e+06	3.41801e+06		2	978.543	6.772e-07	4.28
[K].ESWEMSSEEK.[L]	1xTMT6plex [K10]; 1xTMT6plex [N-Term]	1	1	5	W5PNZ5	W5PNZ5 [286-295]	0	1699.82	10	2.35921e+06	2.09225e+06	2.51301e+06	2.50757e+06	2.65316e+06	2.26797e+06		2	850.412	2.035e-05	3.16
[K].ESWEMSSEEKLEQSTIVK.[E]	2xTMT6plex [K10; K18]; 1xTMT6plex [N-Term]	1	1	2	W5PNZ5	W5PNZ5 [286-303]	1	2827.5	18	3.70531e+06	3.25787e+06	4.17794e+06	3.36438e+06	4.08866e+06	3.55578e+06		3	943.167	1.331e-06	2.63
[K].ESWEMSSEEKLEQSTIVK.[E]	1xDeamidated [Q13]; 2xTMT6plex [K10; K18]; 1xTMT6plex [N-Term]	1	1	1	W5PNZ5	W5PNZ5 [286-303]	1	2828.48	18	1.14046e+06	1.05849e+06	1.35411e+06	1.03689e+06	1.29488e+06	1184629		3	943.502	3.19e-06	2.44
[K].KGAVVEDAEEPKTEPEAK.[K]	3xTMT6plex [K1; K12; K18]; 1xTMT6plex [N-Term]	2	2	1	W5NUX2; W5QEQ3	W5NUX2 [7-24]; W5QEQ3 [7-24]	2	2843.62	18	1.66624e+06	1.62263e+06	2.0039e+06	1.41989e+06	1.65603e+06	1.46645e+06	Shared	4	711.655	5.061e-05	4.57
[K].KGAVVEDAEEPK.[T]	2xTMT6plex [K1; K12]; 1xTMT6plex [N-Term]	2	2	2	W5NUX2; W5QEQ3	W5NUX2 [7-18]; W5QEQ3 [7-18]	1	1959.14	12	5.43362e+06	5819332	6.22462e+06	6.40185e+06	7.50969e+06	6.66519e+06	Shared	3	653.716	5.413e-06	4.52
[R].NIFDFNALK.[E]	1xTMT6plex [K9]; 1xTMT6plex [N-Term]	1	1	8	W5PJB6	W5PJB6 [234-242]	0	1539.89	9	3.75069e+07	3.27599e+07	4.96849e+07	36926898	4.58721e+07	4.21342e+07		2	770.444	7.783e-05	3.48
[K].ESYNVQLQLPAR.[V]	1xTMT6plex [N-Term]	1	1	1	W5QHQ8	W5QHQ8 [322-333]	0	1646.91	12	1.40322e+06	1.42902e+06	1.50038e+06	1.30828e+06	1.35655e+06	1.16227e+06		2	823.95	4.729e-05	3.57
[K].ESYSVYVYK.[V]	1xTMT6plex [K9]; 1xTMT6plex [N-Term]	1	12	12	W5Q9Y2	W5Q9Y2 [36-44]	0	1595.87	9	1.60568e+08	1.55178e+08	1.43425e+08	1.04977e+08	9.16894e+07	8.14349e+07		2	798.435	7.214e-05	3.03
[R].ESYVETELIFALAK.[T]	1xTMT6plex [K14]; 1xTMT6plex [N-Term]	1	1	1	W5PUT6	W5PUT6 [1169-1182]	0	2071.17	14	1.26797e+06	1.14907e+06	1284501	1.29037e+06	1.23626e+06	1.24047e+06		2	1036.08	3.227e-08	5.51
[K].ETAAEQKEDQSEDK.[K]	2xTMT6plex [K7; K14]; 1xTMT6plex [N-Term]	1	1	2	W5PIF9	W5PIF9 [115-128]	1	2295.19	14	908812	872017	913942	898070	870250	870666		3	765.733	7.718e-05	2.11
[K].NLEWIAGGTWTPSALK.[F]	1xTMT6plex [K16]; 1xTMT6plex [N-Term]	1	1	5	W5PTN6	W5PTN6 [664-679]	0	2202.23	16	1.04266e+08	1.1246e+08	9.3096e+07	1.12782e+08	1.25516e+08	1.05157e+08		2	1101.61	1.8e-08	5.76
[R].ETACTTGVLQTLTLFK.[G]	1xCarbamidomethyl [C4]; 1xTMT6plex [K16]; 1xTMT6plex [N-Term]	1	1	6	W5QG01	W5QG01 [440-455]	0	2241.26	16	8.95444e+06	9.02423e+06	9.62582e+06	1.04564e+07	1.15371e+07	1.08432e+07		2	1121.12	3.23e-08	5.62
[R].ETADTDTADQVMASFK.[I]	1xTMT6plex [K16]; 1xTMT6plex [N-Term]	1	1	8	W5QJ62	W5QJ62 [813-828]	0	2188.08	16	3.54503e+06	3.18498e+06	3.27279e+06	3.63127e+06	4.14889e+06	3448341		2	1094.55	3.418e-10	4.55
[R].NIEVMNSFELLSHTVEEK.[I]	1xTMT6plex [K18]; 1xTMT6plex [N-Term]	1	1	1	W5Q942	W5Q942 [84-101]	0	2577.36	18	1.32489e+06	1194293	1.53131e+06	1.428e+06	1.5944e+06	1.50592e+06		3	859.784	0.0001239	3.92
[R].KGASLSPEEILGEEEEEVVR.[L]	1xTMT6plex [K1]; 1xTMT6plex [N-Term]	1	1	1	W5NSB9	W5NSB9 [355-374]	1	2658.42	20	92901.7	90037.4	102687	108324	124497	121349		3	886.814	6.769e-05	2.95
[R].ETADTDTAEQVIASFR.[I]	1xTMT6plex [N-Term]	1	1	2	W5P0L8	W5P0L8 [823-838]	0	1982.99	16	441639	218344	490277	217094	229294	195221		2	991.997	4.127e-09	3.17
[R].NLETLQQELGIEGENR.[V]	1xTMT6plex [N-Term]	1	1	2	W5NUL7	W5NUL7 [226-241]	0	2072.08	16	355099	350882	389754	390501	474925	430722		2	1036.54	1.968e-07	3.76
[R].ETAEADVASLNR.[R]	1xTMT6plex [N-Term]	1	1	11	W5QI04	W5QI04 [63-74]	0	1504.78	12	1.02345e+06	953022	1.11312e+06	1.04242e+06	1.23521e+06	1.04329e+06		2	752.896	1.133e-06	2.84
[R].NLESTVSQIEK.[E]	1xTMT6plex [K11]; 1xTMT6plex [N-Term]	1	2	1	W5PGB5	W5PGB5 [476-486]	0	1705.97	11	1.94949e+06	1.71223e+06	2.07544e+06	2.0599e+06	2.36056e+06	2.13574e+06		2	853.489	7.605e-06	4.71
[K].ETAENYLGHTAK.[N]	1xTMT6plex [K12]; 1xTMT6plex [N-Term]	1	1	1	W5Q4W8	W5Q4W8 [176-187]	0	1791.96	12	716260	709855	671070	689395	752700	578586		2	896.483	0.0001263	1.77
[R].ETAETDTAEQVVASFK.[I]	1xTMT6plex [K16]; 1xTMT6plex [N-Term]	1	1	2	W5P9P1	W5P9P1 [829-844]	0	2184.14	16	999235	892079	3.15875e+06	1.08625e+06	812040	924912		3	728.717	2.092e-06	4.93
[K].NIFNEDTSDFSGMSETK.[G]	1xDeamidated [N4]; 1xTMT6plex [K17]; 1xTMT6plex [N-Term]	1	1	2	W5P8T8	W5P8T8 [307-323]	0	2381.12	17	1.13915e+06	1.05319e+06	1.32327e+06	1.48365e+06	1.70167e+06	1.58901e+06		2	1191.07	1.597e-06	2.99
[K].ESVNAAFEMTLAEGVK.[L]	1xOxidation [M9]; 1xTMT6plex [K16]; 1xTMT6plex [N-Term]	1	1	3	W5NQC6	W5NQC6 [243-258]	0	2170.15	16	2.17425e+06	1.97449e+06	3.15909e+06	2.33777e+06	2.74118e+06	2.42182e+06		3	724.049	0.0001012	3.35
[K].ESVNAAFEMTLAEGVK.[L]	1xTMT6plex [K16]; 1xTMT6plex [N-Term]	1	1	2	W5NQC6	W5NQC6 [243-258]	0	2154.15	16	1.52594e+06	1.43565e+06	1.58327e+06	1.62436e+06	1.76646e+06	1.84629e+06		2	1077.57	8.347e-08	5.35
[R].ESVLTATSILNNPIVK.[A]	1xTMT6plex [K16]; 1xTMT6plex [N-Term]	1	1	4	W5Q245	W5Q245 [439-454]	0	2157.29	16	7232959	6.77528e+06	7.97395e+06	7.09459e+06	7.8828e+06	7.44649e+06		2	1079.14	1.704e-07	4.49
[K].NILFVITKPDVYK.[S]	2xTMT6plex [K8; K13]; 1xTMT6plex [N-Term]	1	4	6	W5PEL1	W5PEL1 [1767-1779]	0	2237.39	13	1.8761e+07	1.57324e+07	2.04263e+07	2.10221e+07	2.12534e+07	1.86355e+07		3	746.463	5.18e-07	4.69
[K].NLIEMSELEIK.[H]	1xTMT6plex [K11]; 1xTMT6plex [N-Term]	1	1	2	W5Q9H8	W5Q9H8 [375-385]	0	1777.02	11	3.15358e+06	2883695	3.33472e+06	2.75497e+06	3.12103e+06	2.76005e+06		2	889.01	1.375e-05	3.78
[R].NLIDEDGNNQWPEGLK.[F]	1xTMT6plex [K16]; 1xTMT6plex [N-Term]	1	1	4	W5NXX1	W5NXX1 [183-198]	0	2300.19	16	3.35473e+06	3.00754e+06	4.19847e+06	3.89504e+06	4.50727e+06	3.99734e+06		2	1150.6	2.726e-07	4.38
[K].ESTEAQSLEAFYEK.[L]	1xTMT6plex [K14]; 1xTMT6plex [N-Term]	1	1	1	W5PFX4	W5PFX4 [651-664]	0	2090.07	14	163574	162619	181866	180545	181903	179567		2	1045.54	2.326e-05	2.35
[K].NLIDAGVDALR.[V]	1xTMT6plex [N-Term]	1	1	4	W5Q1I6	W5Q1I6 [312-322]	0	1385.79	11	5.16433e+06	4.62751e+06	5.73793e+06	6.61586e+06	6.75235e+06	5.88519e+06		2	693.403	3.671e-05	3.74
[K].NLKPIKPMQFLGDEETVR.[K]	1xDeamidated [Q9]; 2xTMT6plex [K3; K6]; 1xTMT6plex [N-Term]	1	1	4	W5P2R0	W5P2R0 [177-194]	0	2803.6	18	7.30393e+06	6.90965e+06	8.33953e+06	8.14103e+06	9.96117e+06	9.29296e+06		3	935.211	3.887e-06	2.51
[K].NLKPIKPMQFLGDEETVR.[K]	2xTMT6plex [K3; K6]; 1xTMT6plex [N-Term]	1	1	6	W5P2R0	W5P2R0 [177-194]	0	2802.62	18	1.77258e+07	1.55451e+07	1.9993e+07	1.86457e+07	2.27091e+07	2.11251e+07		4	701.406	4.323e-07	5.36
[R].ESTGAQVQVAGDMLPNSTER.[A]	1xTMT6plex [N-Term]	2	3	1	W5Q4P4; W5QE14	W5Q4P4 [125-144]; W5QE14 [125-144]	0	2319.14	20	43912.6	30576.7	43494.9	33969.9	48638.4	37925.4	Shared	2	1160.07	2.838e-06	2.54
[K].NLKPEDFQLLCLDGSR.[K]	1xCarbamidomethyl [C11]; 1xTMT6plex [K3]; 1xTMT6plex [N-Term]	1	1	3	W5PFC9	W5PFC9 [580-595]	0	2363.28	16	4.01885e+06	4.17821e+06	4663763	6.61475e+06	7.87651e+06	6.54377e+06		3	788.429	8.486e-05	3.11
[K].NLHTLILINNK.[I]	1xDeamidated [N]; 1xTMT6plex [K11]; 1xTMT6plex [N-Term]	1	2	12	W5Q2F5	W5Q2F5 [107-117]	0	1752.08	11	2.72731e+07	2.46708e+07	2.67819e+07	2.95348e+07	3.37288e+07	3.12875e+07		2	876.539	5.956e-06	4.41
[K].NLHTLILINNK.[I]	1xTMT6plex [K11]; 1xTMT6plex [N-Term]	1	2	30	W5Q2F5	W5Q2F5 [107-117]	0	1751.09	11	1.70486e+08	1.51749e+08	1.58446e+08	1.9897e+08	2.22556e+08	1.87492e+08		2	876.045	7.76e-06	5.39
[R].ETAETDTAEQVVASFK.[I]	1xDeamidated [Q10]; 1xTMT6plex [K16]; 1xTMT6plex [N-Term]	1	1	2	W5P9P1	W5P9P1 [829-844]	0	2185.13	16	208971	157918	768330	186186	179863	183310		3	729.054	1.779e-06	4.39
[R].ESTPDELLRPLAELALER.[Q]	1xTMT6plex [N-Term]	1	1	3	W5PXM9	W5PXM9 [118-135]	0	2281.26	18	1.8727e+06	1.83989e+06	2.08241e+06	2.44582e+06	2.87667e+06	2.60145e+06		3	761.087	6.559e-06	2.75
[K].NLGTALAELR.[T]	1xTMT6plex [N-Term]	1	1	7	W5PQK6	W5PQK6 [1034-1043]	0	1286.76	10	1.75251e+07	1.63783e+07	1.98288e+07	1.8394e+07	2.16734e+07	1.88876e+07		2	643.882	6.856e-05	3.3
[R].NLGSINTELQDVQR.[I]	1xTMT6plex [N-Term]	1	1	7	W5QGX9	W5QGX9 [137-150]	0	1815.98	14	5.78928e+06	5.51357e+06	6.39552e+06	5.68046e+06	6.59684e+06	6.06328e+06		2	908.494	5.391e-08	3.27
[K].ESVDGQWVCISDVNK.[G]	1xCarbamidomethyl [C9]; 1xTMT6plex [K15]; 1xTMT6plex [N-Term]	1	1	4	W5PPQ6	W5PPQ6 [291-305]	0	2194.12	15	6.43992e+06	6.13681e+06	7.20897e+06	5.82971e+06	6.40066e+06	5.72579e+06		2	1097.57	1.339e-06	2.73
[K].ESVDGQWVCISDVNK.[G]	1xCarbamidomethyl [C9]; 1xDeamidated [Q6]; 1xTMT6plex [K15]; 1xTMT6plex [N-Term]	1	1	1	W5PPQ6	W5PPQ6 [291-305]	0	2195.11	15	250976	230509	263865	246788	255703	250419		2	1098.06	1.851e-05	2.9
[K].NIGNLFEEAEK.[L]	1xTMT6plex [K11]; 1xTMT6plex [N-Term]	1	1	4	W5PBD8	W5PBD8 [1412-1422]	0	1721.95	11	3.92269e+06	3.79052e+06	4.15363e+06	3.43334e+06	3.6444e+06	3.32261e+06		2	861.476	7.26e-06	4.21
[K].ESVELLLEDWHK.[F]	1xTMT6plex [K12]; 1xTMT6plex [N-Term]	1	2	2	W5QJ27	W5QJ27 [513-524]	0	1956.08	12	533630	499170	576187	546790	642902	551952		3	652.696	3.556e-05	3.8
[R].ESVEQQADSFK.[A]	1xTMT6plex [K11]; 1xTMT6plex [N-Term]	1	2	2	W5QGU2	W5QGU2 [471-481]	0	1725.91	11	520520	440490	540760	574486	596948	516728		2	863.451	2.674e-05	3.28
[K].KGCHPNDIENPR.[G]	1xCarbamidomethyl [C3]; 1xTMT6plex [K1]; 1xTMT6plex [N-Term]	1	2	3	B0FYY4	B0FYY4 [73-84]	1	1895	12	4.18675e+06	4.28727e+06	4.54573e+06	4.21754e+06	5.08684e+06	4.43445e+06		3	632.331	3.158e-05	2.74
[K].NLGGASAQVESSSLQR.[T]	1xTMT6plex [N-Term]	1	2	1	W5PVR3	W5PVR3 [13-28]	0	1832.97	16	406124	433603	462206	387336	434484	392908		2	916.984	9.183e-08	3.2
[K].NLFTEAGCSVK.[A]	1xCarbamidomethyl [C8]; 1xTMT6plex [K11]; 1xTMT6plex [N-Term]	1	2	4	W5P9A1	W5P9A1 [494-504]	0	1683.91	11	8.33098e+06	8.37423e+06	9.86831e+06	1.01162e+07	1.30945e+07	1.16062e+07		2	842.454	7.925e-06	3.27
[K].NIFNEDTSDFSGMSETK.[G]	1xOxidation [M13]; 1xTMT6plex [K17]; 1xTMT6plex [N-Term]	1	1	7	W5P8T8	W5P8T8 [307-323]	0	2396.13	17	5.76634e+06	4.95547e+06	6.91173e+06	7.69539e+06	8.84049e+06	8.19593e+06		3	799.379	0.0001285	3.35
[R].NIGVEVFSLGIK.[A]	1xTMT6plex [K12]; 1xTMT6plex [N-Term]	1	1	1	W5P8W6	W5P8W6 [266-277]	0	1734.06	12	129082	126211	145728	175348	204947	190955		2	867.527	1.147e-05	2.37
[R].NIIGLQMGTNK.[F]	1xTMT6plex [K11]; 1xTMT6plex [N-Term]	1	2	6	Q7YRL2	Q7YRL2 [162-172]	0	1646.97	11	1.32909e+07	14941035	1.35815e+07	1.28498e+07	14791551	15261586		2	823.983	2.542e-06	4.33
[K].NLEPILEGYIGNLR.[K]	1xTMT6plex [N-Term]	1	1	4	W5Q659	W5Q659 [191-204]	0	1830.03	14	6.3051e+06	5.20804e+06	6.43092e+06	5.43764e+06	6.06216e+06	5.37129e+06		2	915.515	1.659e-06	3.85
[R].ETALQMEQVWR.[R]	1xTMT6plex [N-Term]	1	1	6	W5PS45	W5PS45 [231-241]	0	1619.84	11	9.76903e+06	9.95798e+06	9.29581e+06	8.73328e+06	9.61596e+06	8.98051e+06		2	810.419	3.22e-05	2.87
[R].NLDLNSIIDEVK.[N]	1xDeamidated [N]; 1xTMT6plex [K12]; 1xTMT6plex [N-Term]	1	1	7	W5Q611	W5Q611 [306-317]	0	1832.04	12	4.39022e+06	4.75496e+06	4.73712e+06	6.73676e+06	7.92298e+06	8.41167e+06		2	916.522	6.269e-07	2.92
[R].NLDLNSIIDEVK.[N]	1xTMT6plex [K12]; 1xTMT6plex [N-Term]	1	1	11	W5Q611	W5Q611 [306-317]	0	1831.06	12	4.6639e+07	6.12108e+07	5.09951e+07	1.00602e+08	1.13518e+08	1.15834e+08		2	916.028	1.216e-07	4.15
[R].NLDLNSIIAEVR.[A]	1xDeamidated [N5]; 1xTMT6plex [N-Term]	1	1	1	W5Q624	W5Q624 [292-303]	0	1586.9	12	4.12613e+06	12134341	3.97307e+06	1.59165e+06	1449235	1.5715e+06		2	793.946	1.482e-05	3.73
[R].ETENDDLTNVIQK.[M]	1xTMT6plex [K13]; 1xTMT6plex [N-Term]	1	1	10	W5PT14	W5PT14 [552-564]	0	1977.05	13	2.58362e+06	2.1876e+06	2.82082e+06	2.43977e+06	2.70777e+06	2.44998e+06		3	659.689	2.732e-06	3.75
[R].NLDLNSIIAEVR.[A]	1xTMT6plex [N-Term]	1	1	4	W5Q624	W5Q624 [292-303]	0	1585.91	12	9.6359e+06	8.89792e+06	1.16286e+07	1.07273e+07	1.1649e+07	1.03116e+07		2	793.454	2.283e-06	3.97
[K].NIDINDVTPNCR.[V]	1xCarbamidomethyl [C11]; 1xTMT6plex [N-Term]	1	1	3	W5PW97	W5PW97 [108-119]	0	1659.83	12	2.40464e+06	2170505	2.47828e+06	2.54439e+06	3.04078e+06	2.66108e+06		2	830.414	5.498e-05	2.66
[R].NLDIERPTYTNLNR.[L]	1xDeamidated [N]; 1xTMT6plex [N-Term]	2	9	11	D0VWZ0; C5ISA2	D0VWZ0 [216-229]; C5ISA2 [216-229]	0	1949.03	14	1.40057e+07	1.17348e+07	1.53963e+07	1.32692e+07	1.47473e+07	1.36607e+07	Shared	3	650.346	4.52e-06	4.03
[R].NLDIERPTYTNLNR.[L]	1xTMT6plex [N-Term]	2	9	13	D0VWZ0; C5ISA2	D0VWZ0 [216-229]; C5ISA2 [216-229]	0	1948.04	14	7.0465e+07	6.20597e+07	7.55816e+07	7.29283e+07	7.57385e+07	6.84531e+07	Shared	3	650.015	3.749e-05	4.2
[K].ETESTPPVTMDLASAEGTVPPTDQEMAPVK.[G]	1xDeamidated [Q24]; 1xTMT6plex [K30]; 1xTMT6plex [N-Term]	1	1	2	W5NXB5	W5NXB5 [355-384]	0	3587.77	30	259305	223656	312265	306504	367393	341829		3	1196.61	7.38e-05	1.85
[R].NLDLDSIIAEVR.[A]	1xDeamidated [N1]; 1xTMT6plex [N-Term]	1	1	1	W5Q5U5	W5Q5U5 [321-332]	0	1587.88	12	626397	574916	655557	682836	645703	635392		2	794.436	1.735e-05	3.94
[K].ETETQDTVGIYQNFEK.[K]	1xTMT6plex [K16]; 1xTMT6plex [N-Term]	1	1	1	W5NPP9	W5NPP9 [298-313]	0	2360.2	16	463836	367355	529705	548267	600892	529347		3	787.403	3.025e-05	4.03
[K].ETETQDTVGIYQNFEK.[K]	1xDeamidated [Q12]; 1xTMT6plex [K16]; 1xTMT6plex [N-Term]	1	1	1	W5NPP9	W5NPP9 [298-313]	0	2361.19	16	195349	170290	227563	232310	246167	258433		3	787.74	6.208e-05	3.61
[K].ETFDPEKETIPDIDPNAK.[L]	2xTMT6plex [K7; K18]; 1xTMT6plex [N-Term]	1	1	1	W5PFV7	W5PFV7 [776-793]	1	2746.48	18	447866	479267	496133	606467	605840	534910		3	916.163	4.374e-06	3.12
[R].NLDLDSIIAEVK.[A]	1xDeamidated [N1]; 1xTMT6plex [K12]; 1xTMT6plex [N-Term]	3	3	3	W5Q6D3; W5Q5S8; W5Q6B8	W5Q6D3 [328-339]; W5Q5S8 [291-302]; W5Q6B8 [307-318]	0	1789.04	12	4.01279e+06	3.74641e+06	4.52071e+06	7.36293e+06	8.60804e+06	8.88934e+06	Shared	2	895.016	1.716e-07	4.26
[R].NLDLDSIIAEVK.[A]	1xTMT6plex [K12]; 1xTMT6plex [N-Term]	3	3	20	W5Q6D3; W5Q5S8; W5Q6B8	W5Q6D3 [328-339]; W5Q5S8 [291-302]; W5Q6B8 [307-318]	0	1788.05	12	1.57795e+08	1.43543e+08	1.69577e+08	3.07568e+08	3.66069e+08	3.43778e+08	Shared	2	894.523	2.07e-07	4.85
[K].ETFGVNNTVYGIDAMNPSSR.[D]	1xTMT6plex [N-Term]	1	1	2	W5P0D4	W5P0D4 [85-104]	0	2401.17	20	976459	892894	1.05309e+06	1.11971e+06	1.14908e+06	1.11386e+06		2	1201.08	2.717e-06	3.59
[R].NLDLDGIIAEVK.[A]	1xTMT6plex [K12]; 1xTMT6plex [N-Term]	1	1	13	W5Q5N9	W5Q5N9 [248-259]	0	1758.04	12	4.89965e+07	4.84429e+07	5.3834e+07	5.85248e+07	7.03053e+07	6.24484e+07		2	879.517	7.459e-07	5.38
[R].ETFPEATIIKPADIFGR.[E]	1xTMT6plex [K10]; 1xTMT6plex [N-Term]	1	1	3	W5PI58	W5PI58 [193-209]	0	2363.34	17	4.47794e+06	4.40098e+06	5.35968e+06	5.16412e+06	6.04444e+06	6.04411e+06		3	788.444	2.009e-07	4.8
[K].ETFQSIFLDVSHAK.[L]	1xTMT6plex [K14]; 1xTMT6plex [N-Term]	1	1	2	W5PPP8	W5PPP8 [166-179]	0	2080.15	14	3.80703e+06	3.53755e+06	4.26045e+06	4.90474e+06	5.17586e+06	4.85724e+06		3	694.048	3.419e-05	4.46
[K].NLDKEYLPIGGLAEFCK.[A]	1xCarbamidomethyl [C16]; 2xTMT6plex [K4; K17]; 1xTMT6plex [N-Term]	1	1	6	W5NUG0	W5NUG0 [91-107]	1	2654.48	17	1.26975e+07	1.1307e+07	1.4519e+07	1.20775e+07	1.32956e+07	1.23146e+07		3	885.493	7.923e-10	5.67
[R].NLDFQDVLDK.[L]	1xTMT6plex [K10]; 1xTMT6plex [N-Term]	1	1	3	W5Q9D9	W5Q9D9 [442-451]	0	1664.93	10	1.3913e+07	1.30456e+07	1.66614e+07	1.55904e+07	1.77368e+07	1.84087e+07		2	832.962	7.64e-05	3.45
[K].NLDFGIDMDSR.[I]	1xTMT6plex [N-Term]	1	1	2	W5PVA4	W5PVA4 [640-650]	0	1511.74	11	2.18555e+06	2.03468e+06	2.4736e+06	2594235	3.08283e+06	2.70131e+06		2	756.369	4.559e-05	3.04
[R].ETGERPSNEEIMR.[F]	1xTMT6plex [N-Term]	1	1	6	W5Q2P3	W5Q2P3 [279-291]	0	1776.87	13	1.12502e+06	1.03674e+06	1.2666e+06	1.43668e+06	1.74925e+06	1.68091e+06		3	592.964	0.0001151	3.2
[R].NLDIYEQQVTTAAR.[K]	1xTMT6plex [N-Term]	1	1	1	W5Q0V2	W5Q0V2 [25-38]	0	1850.98	14	685944	643054	728548	705277	756267	734590		2	925.987	1.64e-05	2.63
[K].NLDNAAEAAEQFK.[L]	1xTMT6plex [K13]; 1xTMT6plex [N-Term]	1	1	2	W5PPF4	W5PPF4 [36-48]	0	1879	13	1.02734e+06	802405	978460	1.24338e+06	1.31437e+06	1.09214e+06		2	939.999	4.876e-05	2.45
[R].NIDSEEVGK.[I]	1xTMT6plex [K9]; 1xTMT6plex [N-Term]	2	2	45	W5QCP9; Q9MZW2	W5QCP9 [1759-1767]; Q9MZW2 [32-40]	0	1448.8	9	2.8958e+08	3.12015e+08	2.783e+08	3.12324e+08	3.50452e+08	2.94256e+08	Shared	2	724.903	6.576e-05	2.86
[K].ETEGNIPPAETFMSTK.[D]	1xDeamidated [N5]; 1xTMT6plex [K16]; 1xTMT6plex [N-Term]	1	1	1	W5QFK2	W5QFK2 [4250-4265]	0	2211.13	16	442837	419932	462826	502126	614835	465361		2	1106.07	0.0001112	2.48
[K].NLELNDDTVLNEIK.[L]	1xTMT6plex [K14]; 1xTMT6plex [N-Term]	1	1	2	W5PL13	W5PL13 [319-332]	0	2088.16	14	466084	395966	513040	496218	546827	502007		2	1044.58	9.613e-06	2.73
[R].NIELICQENEGENNPVLQR.[I]	1xCarbamidomethyl [C6]; 1xDeamidated [N9]; 1xTMT6plex [N-Term]	1	2	1	W5P3N0	W5P3N0 [248-266]	0	2499.23	19	49864.9	58871	65634.4	69357.8	74656.4	72265.7		2	1250.13	1.914e-05	3.17
[R].NIELICQENEGENNPVLQR.[I]	1xCarbamidomethyl [C6]; 1xTMT6plex [N-Term]	1	2	4	W5P3N0	W5P3N0 [248-266]	0	2498.25	19	2.19037e+06	1249058	2.26585e+06	1.64382e+06	2.13175e+06	2.1394e+06		3	833.421	5.543e-07	5.39
[K].NLEGYVGFANLPNQVYR.[K]	1xTMT6plex [N-Term]	1	1	2	W5P4C7	W5P4C7 [6-22]	0	2183.14	17	6.04389e+06	4.71738e+06	7.17668e+06	8.47839e+06	8291947	6805216		2	1092.07	2.276e-07	4.03
[R].ETCGCCDCEK.[R]	4xCarbamidomethyl [C3; C5; C6; C8]; 1xTMT6plex [K10]; 1xTMT6plex [N-Term]	1	1	15	W5PTN6	W5PTN6 [570-579]	0	1776.74	10	1.26655e+07	1.33074e+07	1.27871e+07	1.30338e+07	1.59773e+07	1.37679e+07		2	888.872	6.598e-06	2.92
[R].ETDCGVHINAGPEIGVASTK.[A]	1xCarbamidomethyl [C4]; 1xDeamidated [N9]; 1xTMT6plex [K20]; 1xTMT6plex [N-Term]	2	2	1	W5QEY8; W5NTN0	W5QEY8 [379-398]; W5NTN0 [560-579]	0	2514.29	20	284067	265364	268406	291339	299188	251008	Shared	3	838.77	0.0001053	3.05
[R].ETDDTLVLSFVGQTR.[V]	1xTMT6plex [N-Term]	1	1	1	W5PQ34	W5PQ34 [420-434]	0	1910.01	15	148812	128244	155842	154064	172601	153527		2	955.508	2.235e-05	1.86
[K].ETDDVFDALMLK.[S]	1xTMT6plex [K12]; 1xTMT6plex [N-Term]	1	2	1	W5QAD1	W5QAD1 [544-555]	0	1854.99	12	299197	276978	330488	363131	435116	356405		2	927.994	2.118e-06	2.82
[K].LEESYDLSEPLAR.[L]	1xTMT6plex [N-Term]	1	1	3	D8X187	D8X187 [277-289]	0	1750.91	13	329346	251955	364358	485110	361517	355676		2	875.962	2.035e-06	2.71
[K].KFYPLEIDYGQDEEAVK.[K]	2xTMT6plex [K1; K17]; 1xTMT6plex [N-Term]	1	1	1	W5NRR3	W5NRR3 [639-655]	1	2731.48	17	779230	743907	934462	915368	1.05902e+06	960226		3	911.158	3.518e-05	3.08
[K].ETDKNISEAFEDLSK.[L]	2xTMT6plex [K4; K15]; 1xTMT6plex [N-Term]	1	1	2	W5PHU6	W5PHU6 [137-151]	1	2413.31	15	2.07894e+06	1.90029e+06	2.37634e+06	2.36793e+06	2.70317e+06	2.40131e+06		3	805.106	7.949e-07	3.94
[K].NLEPEWAAAATEVK.[E]	1xTMT6plex [K14]; 1xTMT6plex [N-Term]	1	1	10	W5Q282	W5Q282 [195-208]	0	1987.09	14	1.49224e+07	1.37485e+07	1.69942e+07	1.41225e+07	16430053	1.50401e+07		2	994.048	4.447e-08	3.36
[R].ETDLQELFRPFGSISR.[I]	1xTMT6plex [N-Term]	1	1	2	W5Q0G0	W5Q0G0 [252-267]	0	2124.13	16	3.93707e+06	3.52898e+06	4.63897e+06	3.81131e+06	4322152	3.99295e+06		3	708.709	2.741e-06	4.78
[R].ETDTYEWVFSPPLEETR.[K]	1xTMT6plex [N-Term]	1	1	2	W5Q233	W5Q233 [1698-1714]	0	2328.12	17	253985	204486	303889	446494	338725	348952		3	776.709	1.032e-05	3.39
[K].ETEASSEVK.[L]	1xTMT6plex [K9]; 1xTMT6plex [N-Term]	1	2	7	W5P5I3	W5P5I3 [47-55]	0	1437.78	9	5.01215e+06	2.98178e+06	5.33614e+06	6.23349e+06	7.58345e+06	7.12838e+06		2	719.396	0.0001109	2.31
[K].NLDTGEEIPLSLAEEK.[L]	1xTMT6plex [K16]; 1xTMT6plex [N-Term]	1	1	1	W5Q5Q8	W5Q5Q8 [360-375]	0	2216.21	16	177711	153647	232121	195122	212785	201247		3	739.406	8.92e-05	3.82
[K].ETEAVIPDHCVFASNTSALPIGEIATVSK.[R]	1xCarbamidomethyl [C10]; 1xTMT6plex [K29]; 1xTMT6plex [N-Term]	1	1	1	B6UV59	B6UV59 [461-489]	0	3514.85	29	557840	519935	575402	641711	652706	579421		3	1172.28	3.26e-08	5.21
[K].ETEAVIPDHCVFASNTSALPIGEIATVSK.[R]	1xCarbamidomethyl [C10]; 1xDeamidated [N15]; 1xTMT6plex [K29]; 1xTMT6plex [N-Term]	1	1	3	B6UV59	B6UV59 [461-489]	0	3515.83	29	6.57891e+06	5.3469e+06	6.48388e+06	6.48926e+06	7.65455e+06	8.28145e+06		3	1172.62	1.247e-08	4.9
[K].NLDSTTVAIHDEEIYCK.[S]	1xCarbamidomethyl [C16]; 1xTMT6plex [K17]; 1xTMT6plex [N-Term]	1	2	1	W5PZX1	W5PZX1 [43-59]	0	2466.26	17	816315	690718	817222	821825	858045	800735		3	822.751	3.201e-06	4.5
[R].ETEEILADVLK.[V]	1xTMT6plex [K11]; 1xTMT6plex [N-Term]	1	2	1	C5ISA3	C5ISA3 [124-134]	0	1718	11	115855	111223	121179	146803	151934	148427		2	859.505	3.926e-05	2.4
[R].NIDSEEVGKIASNSATAFR.[V]	1xDeamidated [N13]; 1xTMT6plex [K9]; 1xTMT6plex [N-Term]	2	2	1	W5QCP9; Q9MZW2	W5QCP9 [1759-1777]; Q9MZW2 [32-50]	1	2468.3	19	559485	448910	648786	1.44727e+06	735963	1.62079e+06	Shared	3	823.438	5.801e-06	2.99
[R].NIDSEEVGKIASNSATAFR.[V]	1xTMT6plex [K9]; 1xTMT6plex [N-Term]	2	2	2	W5QCP9; Q9MZW2	W5QCP9 [1759-1777]; Q9MZW2 [32-50]	1	2467.32	19	5472538	5126876	6.05007e+06	9.73743e+06	6.81872e+06	1.14151e+07	Shared	3	823.105	3.053e-06	2.86
[R].ETEGGTVLTATTSELEAINKR.[V]	1xTMT6plex [K20]; 1xTMT6plex [N-Term]	1	1	2	W5PJ45	W5PJ45 [852-872]	1	2678.46	21	425476	418693	472532	409268	416550	465053		3	893.488	3.72e-06	2.93
[R].ETEGGTVLTATTSELEAINKR.[V]	1xDeamidated [N19]; 1xTMT6plex [K20]; 1xTMT6plex [N-Term]	1	1	1	W5PJ45	W5PJ45 [852-872]	1	2679.45	21	894520	871080	1.05986e+06	818068	999122	987640		3	893.828	3.451e-05	2.22
[K].NLEAVETLGSTSTICSDK.[T]	1xCarbamidomethyl [C15]; 1xTMT6plex [K18]; 1xTMT6plex [N-Term]	1	4	6	P04074	P04074 [358-375]	0	2383.24	18	1.12251e+07	9.97294e+06	1.43974e+07	1.47379e+07	1.79295e+07	1.44663e+07		2	1192.12	3.821e-08	4.78
[R].ESSVSQASDSEGYSGDQSR.[H]	1xTMT6plex [N-Term]	1	1	5	W5QIW0	W5QIW0 [21-39]; [130-148]; [239-257]; [332-350]	0	2204.97	19	4.00647e+06	2.4433e+06	4.1129e+06	4.34208e+06	5.1533e+06	5.44312e+06		2	1102.99	5.625e-11	3.86
[K].KGDECEFLGHSK.[N]	1xCarbamidomethyl [C5]; 2xTMT6plex [K1; K12]; 1xTMT6plex [N-Term]	1	1	2	W5NWF7	W5NWF7 [248-259]	1	2094.13	12	3.72636e+06	3.477e+06	3.98513e+06	3.97414e+06	4.74372e+06	4.02935e+06		3	698.713	3.73e-06	4.25
[K].NILIATGSEVTPFPGITIDEDTVVSSTGALSLK.[K]	1xTMT6plex [K33]; 1xTMT6plex [N-Term]	1	1	2	W5PB39	W5PB39 [178-210]	0	3804.09	33	22117.9	51522.7	48364	52719.3	48049.2	53507.2		4	951.779	1.773e-06	5.08
[R].NLQVEYEQLK.[E]	1xTMT6plex [K10]; 1xTMT6plex [N-Term]	1	2	3	W5NUY7	W5NUY7 [3281-3290]	0	1721.98	10	4.23566e+06	3.26413e+06	4.1331e+06	4.51429e+06	4.17737e+06	3.36691e+06		2	861.49	6.005e-05	3.8
[R].ESGVELFAIGVK.[N]	1xTMT6plex [K12]; 1xTMT6plex [N-Term]	1	1	3	W5Q5Q6	W5Q5Q6 [292-303]	0	1707.01	12	3.84814e+06	3.93814e+06	3.63284e+06	3.14141e+06	2.94596e+06	2.67831e+06		2	854.001	7.872e-05	3.95
[R].NIQVDEANLLTWQGLIVPDNPPYDK.[G]	1xTMT6plex [K25]; 1xTMT6plex [N-Term]	1	1	2	W5Q399	W5Q399 [17-41]	0	3310.77	25	1.23469e+06	1.13472e+06	1.2292e+06	962731	1.0436e+06	934175		3	1104.26	4.766e-07	2.58
[R].NLQTLEIELQSLLATK.[H]	1xTMT6plex [K16]; 1xTMT6plex [N-Term]	2	3	5	W5Q0H4; W5Q0K6	W5Q0H4 [305-320]; W5Q0K6 [309-324]	0	2272.35	16	3.51422e+07	3.13913e+07	3.62453e+07	3.46719e+07	4.34284e+07	3.6938e+07	Shared	2	1136.67	1.347e-08	7.07
[K].NLQTEQASLQSENTQFESETQK.[L]	1xTMT6plex [K22]; 1xTMT6plex [N-Term]	1	1	1	W5PFX4	W5PFX4 [887-908]	0	2998.5	22	117129	113273	127574	132527	144644	129665		3	1000.17	2.825e-06	3.95
[K].ESKEETPGTEWEK.[V]	2xTMT6plex [K3; K13]; 1xTMT6plex [N-Term]	1	1	2	W5NVY3	W5NVY3 [181-193]	1	2237.19	13	3.2741e+06	3.30355e+06	3.66098e+06	3.21511e+06	3.79415e+06	3.16312e+06		3	746.402	2.982e-05	2.65
[R].NLQTCMEVLEALCDGSLGDCK.[E]	3xCarbamidomethyl [C5; C13; C20]; 1xTMT6plex [K21]; 1xTMT6plex [N-Term]	1	1	1	W5PW51	W5PW51 [748-768]	0	2871.38	21	1.10431e+06	876749	1.51747e+06	1131633	1.25869e+06	1.159e+06		3	957.79	1.045e-06	5.08
[R].ESKPPDTSTDECK.[V]	1xCarbamidomethyl [C12]; 2xTMT6plex [K3; K13]; 1xTMT6plex [N-Term]	1	1	21	W5PF65	W5PF65 [351-363]	0	2181.13	13	1.06693e+08	6.717e+07	1.20556e+08	7.03042e+07	7.77912e+07	6.09889e+07		3	727.716	3.06e-06	4.53
[K].NLQQEISDLTEQIAEGGKR.[M]	1xTMT6plex [K18]; 1xTMT6plex [N-Term]	1	1	2	W5PT09	W5PT09 [1501-1519]	1	2587.41	19	580283	283466	1.28304e+06	326574	344952	318210		4	647.604	1.683e-06	5.89
[K].NLQQEISDLTEQIAEGGK.[RQH]	1xTMT6plex [K18]; 1xTMT6plex [N-Term]	3	3	2	W5PT09; W5PBN5; W5PIU1	W5PT09 [1501-1518]; W5PBN5 [1504-1521]; W5PIU1 [1515-1532]	0	2431.31	18	33105268	8.88584e+06	37270430	4.95323e+06	2.73273e+06	4.24067e+06	Shared	2	1216.15	1.408e-09	5.86
[R].NLQPGSEYAVSLVAVK.[G]	1xDeamidated [Q3]; 1xTMT6plex [K16]; 1xTMT6plex [N-Term]	1	2	2	W5QDG7	W5QDG7 [1056-1071]	0	2134.22	16	2.91912e+06	2.42897e+06	2.68649e+06	2679486	2858857	2574820		2	1067.61	4.355e-06	2.83
[R].NLQPETQYTVTVVPVYSEGDGGR.[T]	1xTMT6plex [N-Term]	1	1	4	W5P8W6	W5P8W6 [1906-1928]	0	2738.38	23	2.72687e+06	1.96477e+06	2.86145e+06	1.86948e+06	1.83283e+06	3.63303e+06		2	1369.69	2.244e-10	4.07
[R].NLQNLLILTAIK.[A]	1xTMT6plex [K12]; 1xTMT6plex [N-Term]	1	1	5	W5PUT6	W5PUT6 [1026-1037]	0	1812.17	12	4.70434e+06	4.4375e+06	5.26511e+06	5.13041e+06	5.81945e+06	5.28567e+06		2	906.582	1.85e-06	4.11
[R].NLQEVLGEEK.[L]	1xTMT6plex [K10]; 1xTMT6plex [N-Term]	1	1	4	W5QIA8	W5QIA8 [54-63]	0	1616.93	10	6.42173e+06	5.69399e+06	7.18655e+06	6.84789e+06	7.84085e+06	7.28847e+06		2	808.964	4.563e-05	4.45
[R].KGEDLANINQWVK.[E]	2xTMT6plex [K1; K13]; 1xTMT6plex [N-Term]	1	1	6	W5PXC8	W5PXC8 [198-210]	1	2202.28	13	1.38062e+07	1.1324e+07	1.46854e+07	1.38519e+07	1.65493e+07	1.42852e+07		3	734.76	2.074e-05	4.83
[R].NLQEIQQAGER.[L]	1xTMT6plex [N-Term]	1	1	5	W5QBG6	W5QBG6 [37-47]	0	1514.81	11	4.16493e+06	3.89716e+06	4.47316e+06	3.96546e+06	4.80449e+06	4.08958e+06		2	757.912	7.851e-05	2.42
[K].IEELQLIVNDK.[S]	1xTMT6plex [K11]; 1xTMT6plex [N-Term]	1	1	7	W5PW97	W5PW97 [34-44]	0	1772.06	11	1.09761e+07	1.13633e+07	1.35685e+07	1.38492e+07	1.72641e+07	1.62579e+07		2	886.526	4.911e-05	3.52
[K].NLQEEISDLTEQLGSSGK.[T]	1xTMT6plex [K18]; 1xTMT6plex [N-Term]	1	2	3	W5QDF3	W5QDF3 [1504-1521]	0	2406.28	18	240787	226425	601097	283516	246337	277827		2	1203.64	4.083e-06	2.35
[K].NLQEEISDLTEQLGEGGK.[N]	1xTMT6plex [K18]; 1xTMT6plex [N-Term]	1	1	2	W5NVG7	W5NVG7 [76-93]	0	2418.28	18	58633.8	39820.4	103638	57031.2	357705	69150.3		3	806.761	5.983e-06	3.68
[K].NLQEAEEWYK.[S]	1xDeamidated [Q/N]; 1xTMT6plex [K10]; 1xTMT6plex [N-Term]	2	3	6	K4P1S1; A4ZYA6	K4P1S1 [205-214]; A4ZYA6 [283-292]	0	1768.92	10	4.05475e+06	3.95405e+06	4.27404e+06	4.40987e+06	5.16498e+06	4.7616e+06	Shared	2	884.963	1.587e-05	3.65
[K].NLQEAEEWYK.[S]	1xTMT6plex [K10]; 1xTMT6plex [N-Term]	2	3	14	K4P1S1; A4ZYA6	K4P1S1 [205-214]; A4ZYA6 [283-292]	0	1767.93	10	1.11269e+08	1.21272e+08	1.1145e+08	1.34266e+08	1.49409e+08	1.33553e+08	Shared	2	884.465	1.588e-05	4.37
[R].NIQDTSDLDAIAK.[D]	1xTMT6plex [K13]; 1xTMT6plex [N-Term]	1	1	8	W5PDX8	W5PDX8 [269-281]	0	1862.03	13	5.09066e+06	4.13846e+06	5.59322e+06	5.25795e+06	6132441	5.71163e+06		2	931.516	9.764e-08	3.85
[K].KGDVEGSQSQDEGEGSGESER.[G]	1xDeamidated [Q]; 1xTMT6plex [K1]; 1xTMT6plex [N-Term]	1	1	3	W5PJ45	W5PJ45 [1059-1079]	1	2626.21	21	319446	317941	328544	302845	329929	288701		3	876.082	5.815e-07	3.09
[K].ESGSSQDVAQGPQESAR.[G]	1xTMT6plex [N-Term]	1	1	1	W5Q2Q4	W5Q2Q4 [415-431]	0	1961.94	17	75252.5	57894.5	86796.3	64838.6	65944.6	60966.8		2	981.475	1.352e-07	3.57
[K].NLQVSLTSK.[Q]	1xTMT6plex [K9]; 1xTMT6plex [N-Term]	1	1	19	W5QCP9	W5QCP9 [2454-2462]	0	1447.89	9	1.46938e+08	1.56054e+08	1.48155e+08	1.78542e+08	2.06788e+08	1.85116e+08		2	724.441	7.388e-05	3.09
[K].NLQYYDISAK.[S]	1xTMT6plex [K10]; 1xTMT6plex [N-Term]	1	2	5	C5IJA0	C5IJA0 [143-152]	0	1672.93	10	1.16568e+07	1.04389e+07	1.25317e+07	1.06201e+07	1.16251e+07	1.07491e+07		2	836.965	2.579e-05	4.43
[R].KGEEEHLGILGPQLHADVGDK.[V]	2xTMT6plex [K1; K21]; 1xTMT6plex [N-Term]	1	3	1	W5P4S5	W5P4S5 [795-815]	1	2929.64	21	459927	381272	504418	558978	648950	556866		5	586.728	2.671e-06	3.27
[K].NLTEEMAGLDEIIAK.[L]	1xOxidation [M6]; 1xTMT6plex [K15]; 1xTMT6plex [N-Term]	1	2	3	W5QDF3	W5QDF3 [977-991]	0	2121.15	15	1.0215e+06	862896	2.20928e+06	1.03351e+06	1.3473e+06	1.05601e+06		3	707.72	4.132e-06	3.41
[K].ESEIIDFFLGASLK.[D]	1xTMT6plex [K14]; 1xTMT6plex [N-Term]	1	3	1	W5Q675	W5Q675 [96-109]	0	2027.15	14	2.6097e+06	2.52815e+06	2.86162e+06	3.41984e+06	3.43118e+06	3.10711e+06		2	1014.07	5.245e-06	3.42
[K].ESEIIDFFLGASLKDEVLK.[I]	2xTMT6plex [K14; K19]; 1xTMT6plex [N-Term]	1	2	1	W5Q675	W5Q675 [96-114]	1	2840.63	19	1.6057e+06	1.45331e+06	1.80136e+06	1.6755e+06	1.93908e+06	1.50308e+06		3	947.543	1.6e-06	3.9
[K].NLTEEMAGLDEIIAK.[L]	1xTMT6plex [K15]; 1xTMT6plex [N-Term]	1	2	3	W5QDF3	W5QDF3 [977-991]	0	2105.16	15	1.41089e+06	1.08719e+06	5.28443e+06	1.51187e+06	4.14315e+06	1.32017e+06		2	1053.08	2.422e-10	4.86
[R].ESESAPGDFSLSVK.[F]	1xTMT6plex [K14]; 1xTMT6plex [N-Term]	1	1	2	W5PLS7	W5PLS7 [87-100]	0	1911.01	14	1.42584e+06	1.28571e+06	1.46914e+06	1.44501e+06	1.71528e+06	1.48001e+06		2	956.005	5.863e-05	2.21
[R].ESESEDASPAAPQAVK.[K]	1xDeamidated [Q13]; 1xTMT6plex [K16]; 1xTMT6plex [N-Term]	1	3	1	C5ISB3	C5ISB3 [450-465]	0	2075.05	16	302180	176880	342281	281494	356580	284846		2	1038.04	0.0001034	1.95
[K].NLTEELAGLDETIAK.[L]	1xTMT6plex [K15]; 1xTMT6plex [N-Term]	1	1	2	W5PWV8	W5PWV8 [976-990]	0	2075.16	15	943332	218722	121378	133596	122225	118794		3	692.391	5.498e-06	3.3
[R].NLSTVMDEIHTVLK.[K]	1xTMT6plex [K14]; 1xTMT6plex [N-Term]	1	1	2	W5P588	W5P588 [1116-1129]	0	2058.17	14	2313979	2.21982e+06	2.33549e+06	2.17562e+06	2.40381e+06	1.9896e+06		3	686.722	3.898e-05	4.33
[R].KGEESEEEWAPAEK.[I]	2xTMT6plex [K1; K14]; 1xTMT6plex [N-Term]	1	1	2	W5Q3W1	W5Q3W1 [330-343]	1	2306.21	14	1.27097e+06	1.24308e+06	1.49661e+06	1.25774e+06	1348814	1.3569e+06		3	769.408	5.214e-05	3.57
[K].NLSTFAVDGGTCK.[V]	1xCarbamidomethyl [C12]; 1xTMT6plex [K13]; 1xTMT6plex [N-Term]	1	2	3	C5IWT4	C5IWT4 [148-160]	0	1827.97	13	2.86356e+06	2.73734e+06	3.344e+06	3.1223e+06	4.02652e+06	3.63723e+06		2	914.48	4.353e-05	3.01
[R].NLSIYDGPEQR.[F]	1xTMT6plex [N-Term]	1	1	4	W5P1M1	W5P1M1 [549-559]	0	1520.79	11	3.09625e+06	2.95461e+06	3587038	3.01489e+06	3022346	2.72737e+06		2	760.897	0.0001236	3.26
[K].NLQCLVIDEADR.[I]	1xCarbamidomethyl [C4]; 1xTMT6plex [N-Term]	1	2	4	W5PR35	W5PR35 [415-426]	0	1674.87	12	763043	702543	851347	846033	853917	883752		2	837.937	1.395e-05	2.62
[R].ESFLTSPEELYR.[V]	1xTMT6plex [N-Term]	1	1	3	W5NX31	W5NX31 [213-224]	0	1699.87	12	1.12724e+06	936306	1.44372e+06	1.13124e+06	1.2177e+06	1.06454e+06		2	850.441	2.236e-05	3.45
[R].NISHYEEQLVK.[M]	1xTMT6plex [K11]; 1xTMT6plex [N-Term]	1	1	1	W5Q3N5	W5Q3N5 [282-292]	0	1818.02	11	708358	694111	763384	802291	878627	816160		2	909.508	3.277e-05	2.5
[R].KGEEEHLGILGPQLHADVGDK.[V]	1xDeamidated [Q13]; 2xTMT6plex [K1; K21]; 1xTMT6plex [N-Term]	1	3	1	W5P4S5	W5P4S5 [795-815]	1	2930.62	21	459927	381272	504418	558978	648950	556866		5	586.93	1.64e-05	3.41
[R].ESGAAEQVDNK.[G]	1xTMT6plex [K11]; 1xTMT6plex [N-Term]	1	1	7	W5QC46	W5QC46 [865-875]	0	1605.85	11	2.10291e+06	1.93118e+06	2.37054e+06	2.3119e+06	2.7053e+06	2.397e+06		2	803.425	4.235e-06	3.48
[R].ESGCSFLLALMQK.[H]	1xCarbamidomethyl [C4]; 1xTMT6plex [K13]; 1xTMT6plex [N-Term]	1	3	3	W5PVG1	W5PVG1 [429-441]	0	1942.05	13	6.32232e+06	6.25902e+06	6.87695e+06	8.7186e+06	1.04468e+07	9.30758e+06		2	971.522	1.247e-06	2.32
[K].NISFTVWDVGGQDK.[I]	1xTMT6plex [K14]; 1xTMT6plex [N-Term]	1	3	8	C5IWU0	C5IWU0 [60-73]	0	2024.09	14	7.41436e+06	7.24741e+06	9.0231e+06	9.8986e+06	1.12026e+07	1.02505e+07		2	1012.54	9.487e-09	5.08
[K].ESGEGQGGYAK.[E]	1xTMT6plex [K11]; 1xTMT6plex [N-Term]	1	2	6	W5PFI3	W5PFI3 [280-290]	0	1540.8	11	5.72219e+06	5.2416e+06	5.6373e+06	5.07159e+06	5.44168e+06	4.59751e+06		2	770.902	1.126e-06	2.41
[K].NISEAFEDLSK.[L]	1xTMT6plex [K11]; 1xTMT6plex [N-Term]	1	1	3	W5PHU6	W5PHU6 [141-151]	0	1710.93	11	2613934	2.54818e+06	2.82781e+06	3.23278e+06	3.42038e+06	3.38574e+06		2	855.962	2.564e-05	2.91
[R].ESGLEVPQKVVLPSDVTR.[Y]	1xTMT6plex [K9]; 1xTMT6plex [N-Term]	1	1	1	W5Q759	W5Q759 [402-419]	1	2411.39	18	1.85538e+06	1.52552e+06	2.01362e+06	2.3555e+06	2.25452e+06	2231466		3	804.469	9.127e-05	3.22
[K].NISEAEEWYK.[S]	1xTMT6plex [K10]; 1xTMT6plex [N-Term]	1	1	9	W5QG29	W5QG29 [288-297]	0	1726.91	10	3.30724e+07	3.78253e+07	2.99227e+07	1.6447e+07	1.75853e+07	1.7044e+07		2	863.952	4.235e-05	4.24
[K].NISAISQNLSGEYFR.[Y]	1xTMT6plex [N-Term]	1	1	3	W5PQK8	W5PQK8 [19-33]	0	1928.01	15	4.39313e+06	3.77145e+06	4802964	4511970	5.14107e+06	4.52391e+06		2	964.506	6.775e-05	3.03
[R].NLRPEESQNEAQAR.[D]	1xTMT6plex [N-Term]	1	1	3	W5PG74	W5PG74 [98-111]	0	1870.96	14	2.01955e+06	1.97958e+06	2.41218e+06	2.43958e+06	2890647	2338583		3	624.324	2.309e-06	3.72
[R].ESFNPESYELDK.[S]	1xTMT6plex [K12]; 1xTMT6plex [N-Term]	1	1	2	W5P7C2	W5P7C2 [5-16]	0	1915.97	12	2.65898e+06	1.9705e+06	2.3708e+06	3.42988e+06	4.70091e+06	4354282		2	958.486	5.302e-06	2.88
[K].ESLRGDALGAFNGLSPEDQGNYGAVK.[E]	1xDeamidated [N12]; 1xTMT6plex [K26]; 1xTMT6plex [N-Term]	1	1	1	W5QE21	W5QE21 [132-157]	1	3124.6	26	523790	455066	609135	559769	602889	618504		3	1042.2	1.044e-05	4.55
[K].NIPQMSFDDTDREPDQTFSLNR.[D]	1xTMT6plex [N-Term]	1	1	3	W5PB61	W5PB61 [17-38]	1	2855.35	22	1.88595e+06	1.76407e+06	2.0605e+06	1.99022e+06	2.19822e+06	2.00129e+06		3	952.449	6.587e-07	4.39
[R].ESLSEEEAQK.[M]	1xTMT6plex [K10]; 1xTMT6plex [N-Term]	1	2	8	W5Q255	W5Q255 [678-687]	0	1607.85	10	1.89924e+06	1.55994e+06	1.95102e+06	1.7881e+06	1.99224e+06	1.89013e+06		2	804.432	4.78e-05	2.21
[R].ESQFQQDLRPLQDEQEEK.[R]	1xTMT6plex [K18]; 1xTMT6plex [N-Term]	2	2	5	P22793; W5QIV5	P22793 [886-903]; W5QIV5 [852-869]	0	2705.38	18	1.57139e+06	1.47285e+06	1.85541e+06	1.96686e+06	2.16201e+06	1.8483e+06	Shared	3	902.466	5.236e-09	3.8
[R].ESQFQQDLRPLQDEQEEK.[R]	1xDeamidated [Q]; 1xTMT6plex [K18]; 1xTMT6plex [N-Term]	2	2	5	P22793; W5QIV5	P22793 [886-903]; W5QIV5 [852-869]	0	2706.36	18	1.37998e+06	1.27826e+06	1.63822e+06	1.51401e+06	1.82437e+06	1.45035e+06	Shared	3	902.795	2.224e-06	3.51
[R].ESQFQQDLRPLQDEQEEKR.[E]	1xTMT6plex [K18]; 1xTMT6plex [N-Term]	2	2	8	P22793; W5QIV5	P22793 [886-904]; W5QIV5 [852-870]	1	2861.48	19	1.86583e+07	2.01882e+07	2.53609e+07	1.91011e+07	2.18694e+07	1.89658e+07	Shared	4	716.124	1.231e-06	5.53
[R].ESQFQQDLRPLQDEQEEKR.[E]	1xDeamidated [Q12]; 1xTMT6plex [K18]; 1xTMT6plex [N-Term]	2	2	2	P22793; W5QIV5	P22793 [886-904]; W5QIV5 [852-870]	1	2862.46	19	350171	378558	491490	336029	379942	334677	Shared	3	954.83	1.909e-05	3.48
[K].NLMNAVVQTVK.[AM]	1xTMT6plex [K11]; 1xTMT6plex [N-Term]	1	2	4	W5Q5C7	W5Q5C7 [824-834]	0	1675	11	8.19152e+06	8.06941e+06	9.53346e+06	1.01321e+07	1.20038e+07	11021595		2	837.996	6.765e-05	3.15
[R].ESQGNESDLFMSYFPR.[G]	1xTMT6plex [N-Term]	1	1	4	W5QH35	W5QH35 [144-159]	0	2135.99	16	6.1122e+06	5.6062e+06	6.28405e+06	8.03038e+06	8.69127e+06	7735602		2	1068.49	5.132e-09	6.11
[K].NLITQLDSTFIR.[R]	1xTMT6plex [N-Term]	1	1	2	W5PX92	W5PX92 [22-33]	0	1649.94	12	2.18917e+06	2.39439e+06	2.42655e+06	2.94131e+06	3.52446e+06	3.46938e+06		2	825.467	2.181e-06	3.47
[K].NLLTGETEADPEMIK.[R]	1xTMT6plex [K15]; 1xTMT6plex [N-Term]	1	1	4	W5PIE4	W5PIE4 [173-187]	0	2119.14	15	2.17433e+06	2.08881e+06	2.42441e+06	2.5356e+06	2.9194e+06	2.68126e+06		2	1060.07	5.906e-06	2.46
[K].KGDILTLLNSTNK.[D]	2xTMT6plex [K1; K13]; 1xTMT6plex [N-Term]	1	1	4	W5PJ75	W5PJ75 [990-1002]	1	2104.29	13	6.43279e+06	7.06021e+06	6.97969e+06	1.31524e+07	8.51841e+06	1.05273e+07		2	1052.64	6.75e-06	4.08
[R].NLLTAAADAIER.[V]	1xTMT6plex [N-Term]	1	1	1	W5PAU8	W5PAU8 [405-416]	0	1486.84	12	407894	388904	507277	436662	569445	515349		2	743.922	7.289e-05	2.57
[K].KGDILLDENCCVESLPDKDGK.[K]	2xCarbamidomethyl [C10; C11]; 3xTMT6plex [K1; K18; K21]; 1xTMT6plex [N-Term]	1	1	1	W5PRE5	W5PRE5 [266-286]	2	3321.78	21	529558	468502	582272	549769	584259	568444		4	831.197	7.892e-06	3.78
[K].ESQFLKEELVAAVEDVR.[K]	1xTMT6plex [K6]; 1xTMT6plex [N-Term]	1	1	1	W5Q5C7	W5Q5C7 [82-98]	1	2420.34	17	1.59449e+06	1.52544e+06	1839104	1.88738e+06	2.25373e+06	2111587		3	807.447	3.135e-08	4.82
[K].ESSASEGADQK.[M]	1xTMT6plex [K11]; 1xTMT6plex [N-Term]	2	3	9	W5PCR3; W5PDQ3	W5PCR3 [371-381]; W5PDQ3 [369-379]	0	1566.8	11	3479498	3.72479e+06	3.97923e+06	3.94005e+06	4.43173e+06	4.11619e+06	Shared	2	783.904	3.991e-06	3.47
[K].NLLQEQLQAETELYAEAEEMR.[V]	1xOxidation [M20]; 1xTMT6plex [N-Term]	1	2	1	W5PGT5	W5PGT5 [899-919]	0	2753.35	21	17478.1	18384.2	32504.3	20433.9	25152.8	15965		3	918.453	4.771e-06	4.18
[R].ESSCLALNDLLR.[G]	1xCarbamidomethyl [C4]; 1xTMT6plex [N-Term]	1	2	5	W5P9T6	W5P9T6 [1175-1186]	0	1619.86	12	4.88085e+06	4.42406e+06	5.60396e+06	6.13392e+06	6.9962e+06	6.64965e+06		2	810.431	1.77e-05	2.56
[K].NLLQEQLQAETELYAEAEEMR.[V]	1xTMT6plex [N-Term]	1	2	1	W5PGT5	W5PGT5 [899-919]	0	2737.36	21	14963.9	10931.9			14514.6	11422.1		3	913.125	4.193e-07	4.06
[R].ESSGLPSTLGTR.[E]	1xTMT6plex [N-Term]	1	1	3	W5QB90	W5QB90 [517-528]	0	1433.78	12	3.90221e+06	3.34028e+06	4.31684e+06	3.73385e+06	4.20685e+06	3.92169e+06		2	717.394	1.486e-05	3.66
[R].NILQEGQEAILR.[R]	1xTMT6plex [N-Term]	1	1	7	W5PTA9	W5PTA9 [246-257]	0	1612.92	12	5.20531e+06	4.60954e+06	6.11849e+06	5.35912e+06	6.42399e+06	5.7812e+06		2	806.963	1.164e-06	4.14
[R].NIIPFDQMTIEDLNEVFPETK.[L]	1xTMT6plex [K21]; 1xTMT6plex [N-Term]	1	1	1	W5PP37	W5PP37 [124-144]	0	2951.55	21	1.07593e+06	1.04219e+06	1.07002e+06	1.19851e+06	1.2615e+06	1.24744e+06		2	1476.27	4.195e-06	3.05
[K].KGDEVQCEIEELGVIVNK.[V]	1xCarbamidomethyl [C7]; 2xTMT6plex [K1; K18]; 1xTMT6plex [N-Term]	1	1	4	W5PXA6	W5PXA6 [296-313]	1	2746.53	18	3.20127e+06	2.74259e+06	3.45284e+06	3.27043e+06	3.46658e+06	3.2415e+06		3	916.175	4.354e-07	5.2
[R].KGDEVDGIDEVAK.[K]	2xTMT6plex [K1; K13]; 1xTMT6plex [N-Term]	1	1	11	W5NRR3	W5NRR3 [212-224]	1	2062.16	13	1.49126e+07	1.51033e+07	1.63598e+07	1.54858e+07	1.81819e+07	1.65618e+07		3	688.055	3.961e-06	4.9
[K].NIILEEGKEILVGDVGQTVDDPYATFVK.[M]	2xTMT6plex [K8; K28]; 1xTMT6plex [N-Term]	1	2	4	W5Q9P7	W5Q9P7 [45-72]	1	3750.08	28	2.82143e+07	2.80749e+07	30207258	33438229	3.82875e+07	3.28808e+07		3	1250.69	5.287e-11	8.87
[K].ESSSCGEDTPSK.[K]	1xCarbamidomethyl [C5]; 1xTMT6plex [K12]; 1xTMT6plex [N-Term]	1	1	3	W5NVX3	W5NVX3 [70-81]	0	1741.83	12	965988	857156	1.00784e+06	890782	1.11457e+06	922113		2	871.417	3.694e-05	2.43
[K].ESSSEQYVPDVFYK.[D]	1xTMT6plex [K14]; 1xTMT6plex [N-Term]	1	1	2	W5QAL9	W5QAL9 [414-427]	0	2136.09	14	1.15447e+06	1.04218e+06	1.3358e+06	1.28502e+06	1.38021e+06	1.31281e+06		2	1068.55	3.97e-05	2.55
[K].KGDFELLCK.[D]	1xCarbamidomethyl [C8]; 2xTMT6plex [K1; K9]; 1xTMT6plex [N-Term]	1	1	7	W5PF65	W5PF65 [582-590]	1	1797.05	9	4.16632e+07	2.6392e+07	4.8462e+07	2.94371e+07	3.23445e+07	2.63707e+07		3	599.686	6.465e-05	4.02
[K].ETGQQIGDEVR.[A]	1xTMT6plex [N-Term]	1	1	2	W5NZ83	W5NZ83 [149-159]	0	1460.75	11	417383	410788	493445	426340	518400	418705		2	730.88	8.743e-06	3.34
[K].NINADEAAAMGAVYQAAALSK.[A]	1xTMT6plex [K21]; 1xTMT6plex [N-Term]	1	1	2	W5PSK1	W5PSK1 [408-428]	0	2537.34	21	2.39834e+06	2.21643e+06	2.96661e+06	2.81169e+06	3.21256e+06	3.14011e+06		3	846.444	8.131e-08	5.69
[R].NLNAPVQPFEDPEHMK.[N]	1xTMT6plex [K16]; 1xTMT6plex [N-Term]	1	1	5	W5PBS4	W5PBS4 [2184-2199]	0	2324.21	16	25503258	2.16307e+07	2.75521e+07	25135752	2.73617e+07	2.71236e+07		3	775.403	1.833e-05	4.09
[K].ESLSEEEATSFIK.[Q]	1xTMT6plex [K13]; 1xTMT6plex [N-Term]	1	1	3	W5QHW2	W5QHW2 [83-95]	0	1928.03	13	561873	489827	640788	701147	829133	783986		2	964.519	1.988e-06	2.4
[K].NLPPEEQMISALPDIK.[V]	1xDeamidated [Q7]; 1xTMT6plex [K16]; 1xTMT6plex [N-Term]	1	1	1	W5QDE0	W5QDE0 [408-423]	0	2254.24	16	232587	219931	273604	272440	263929	244479		3	752.088	2.825e-05	3.62
[K].NLPPEEQMISALPDIK.[V]	1xTMT6plex [K16]; 1xTMT6plex [N-Term]	1	1	2	W5QDE0	W5QDE0 [408-423]	0	2253.26	16	1.23085e+06	1.14191e+06	1.48895e+06	1.38076e+06	1.61807e+06	1.45259e+06		2	1127.13	7.598e-06	3.04
[K].NIPMTLELLQSTR.[I]	1xTMT6plex [N-Term]	1	1	3	W5PWT8	W5PWT8 [12-24]	0	1744.98	13	3.41001e+06	3.3417e+06	4.04574e+06	4.05898e+06	4.56826e+06	4.21702e+06		2	872.99	2.3e-05	3.59
[K].ESLSTAAECVR.[V]	1xCarbamidomethyl [C9]; 1xTMT6plex [N-Term]	1	1	2	W5NZ71	W5NZ71 [460-470]	0	1451.74	11	921821	793501	1.03297e+06	1.14554e+06	1.25987e+06	1.1355e+06		2	726.371	7.21e-05	2.51
[K].ESLTEDEATQFLK.[Q]	1xTMT6plex [K13]; 1xTMT6plex [N-Term]	1	1	3	W5PNP6	W5PNP6 [109-121]	0	1969.05	13	636485	522370	712943	847067	932093	881081		3	657.022	2.32e-05	3.05
[K].NLPIYSEEIVEMYK.[G]	1xTMT6plex [K14]; 1xTMT6plex [N-Term]	1	1	5	W5QBQ9	W5QBQ9 [126-139]	0	2186.18	14	9.82189e+06	8.76711e+06	1.00425e+07	1.23976e+07	1.25818e+07	1.15259e+07		2	1093.59	1.075e-07	5.03
[K].KGDVEGSQSQDEGEGSGESER.[G]	1xTMT6plex [K1]; 1xTMT6plex [N-Term]	1	1	1	W5PJ45	W5PJ45 [1059-1079]	1	2625.23	21	138519	121921	121208	118038	114463	133920		3	875.742	4.739e-08	3.86
[K].ESLVAELSATK.[E]	1xTMT6plex [K11]; 1xTMT6plex [N-Term]	1	2	1	W5Q2P6	W5Q2P6 [851-861]	0	1605.95	11	1.63186e+06	1.44153e+06	1.88986e+06	1.79023e+06	1.90983e+06	2096316		2	803.472	3.201e-05	2.48
[K].ESIVDVEGVVR.[K]	1xTMT6plex [N-Term]	1	2	5	W5PLJ1	W5PLJ1 [111-121]	0	1430.81	11	652788	579027	727333	711508	734509	673912		2	715.905	1.925e-05	2.27
[K].NLPIENTTDCLSTMASVCR.[V]	2xCarbamidomethyl [C10; C18]; 1xTMT6plex [N-Term]	1	1	2	W5PD48	W5PD48 [263-281]	0	2411.16	19	1.79144e+06	1.47632e+06	2.12345e+06	1.91787e+06	2.08322e+06	1905268		3	804.39	1.661e-05	3.85
[R].ESQDTSFTTLVER.[V]	1xTMT6plex [N-Term]	1	1	2	W5QEY8	W5QEY8 [86-98]	0	1741.88	13	655484	598178	741067	620045	769310	660780		2	871.437	8.381e-06	2.46
[R].NLPGLVQEGEPFSEEATLFTK.[E]	1xDeamidated [Q7]; 1xTMT6plex [K21]; 1xTMT6plex [N-Term]	1	1	1	W5NVT3	W5NVT3 [541-561]	0	2765.46	21	279964	264857	301286	299519	304496	372616		3	922.491	2.529e-05	3.6
[K].ESMKDDVTGEPLIR.[R]	1xTMT6plex [K4]; 1xTMT6plex [N-Term]	1	1	4	W5QI77	W5QI77 [156-169]	1	2048.11	14	1.34217e+07	1.38338e+07	1.47085e+07	1.5283e+07	1.83625e+07	1.6212e+07		3	683.37	2.21e-05	3.11
[R].NIPGITLLNVSK.[L]	1xTMT6plex [K12]; 1xTMT6plex [N-Term]	1	4	7	W5Q9Z9	W5Q9Z9 [236-247]	0	1727.08	12	6.5709e+06	6.11815e+06	7.69159e+06	6.84163e+06	7.9117e+06	7.34761e+06		2	864.038	1.206e-06	3.8
[K].KGDSSAEELK.[L]	2xTMT6plex [K1; K10]; 1xTMT6plex [N-Term]	1	1	11	W5P1C7	W5P1C7 [136-145]	1	1751.02	10	51609491	4.52782e+07	5.68729e+07	4.52123e+07	5.23669e+07	4.84207e+07		3	584.342	9.37e-06	3.96
[R].NIPEDSADMAK.[L]	1xTMT6plex [K11]; 1xTMT6plex [N-Term]	1	1	3	W5QDE5	W5QDE5 [80-90]	0	1648.86	11	1.17525e+06	1.09768e+06	1.46461e+06	1.33793e+06	1.5783e+06	1.49477e+06		2	824.935	3.996e-05	3.6
[K].NLNSDMDSILASLK.[M]	1xTMT6plex [K14]; 1xTMT6plex [N-Term]	1	1	4	B6UV59	B6UV59 [647-660]	0	1979.09	14	7.37104e+06	7.09732e+06	8.16879e+06	9475322	1.12136e+07	1.0612e+07		2	990.04	2.426e-08	5.85
[R].NINPAVDHCCK.[T]	2xCarbamidomethyl [C9; C10]; 1xTMT6plex [K11]; 1xTMT6plex [N-Term]	1	2	1	W5PXI3	W5PXI3 [490-500]	0	1785.91	11	1.75093e+06	1.59361e+06	1.9218e+06	1.49598e+06	1.72999e+06	1.45069e+06		3	595.974	9.926e-05	3.49
[R].KGDSNANSDVCAAALR.[G]	1xCarbamidomethyl [C11]; 1xTMT6plex [K1]; 1xTMT6plex [N-Term]	1	2	1	W5PE20	W5PE20 [563-578]	1	2107.1	16	1.45957e+06	1.4281e+06	1.50432e+06	1.74852e+06	1.76836e+06	2.16301e+06		3	703.035	1.172e-06	3.07
[R].LEEMLKPLVEEGLR.[C]	1xTMT6plex [K6]; 1xTMT6plex [N-Term]	1	1	3	W5P8G0	W5P8G0 [72-85]	0	2114.23	14	2.83865e+06	2.73457e+06	3.12699e+06	3493556	3.82241e+06	3.79605e+06		3	705.408	2.231e-05	3.24
[K].NINDAWVCTNDMFR.[L]	1xCarbamidomethyl [C8]; 1xTMT6plex [N-Term]	1	1	13	W5NZ10	W5NZ10 [107-120]	0	1984.92	14	1.92383e+07	1.81286e+07	2.27851e+07	2.25033e+07	2.80485e+07	2.56881e+07		2	992.958	4.801e-05	3.79
[R].ESPVQEVHVK.[K]	1xTMT6plex [K10]; 1xTMT6plex [N-Term]	1	1	4	W5NQ79	W5NQ79 [355-364]	0	1609.93	10	3.6127e+06	3.4989e+06	4.45994e+06	3.49696e+06	4.45863e+06	3.32375e+06		3	537.313	9.005e-05	4.08
[K].NINCSVDESLQR.[F]	1xCarbamidomethyl [C4]; 1xTMT6plex [N-Term]	1	1	1	W5PAS5	W5PAS5 [138-149]	0	1663.83	12	563246	483184	632725	626683	738521	652626		2	832.415	2.887e-06	3.45
[R].NLPGLVQEGEPFSEEATLFTK.[E]	1xTMT6plex [K21]; 1xTMT6plex [N-Term]	1	1	1	W5NVT3	W5NVT3 [541-561]	0	2764.48	21	1.62488e+06	1.45172e+06	1.86806e+06	1.86534e+06	2.33444e+06	2.0651e+06		3	922.158	8.645e-05	4.9
[K].NFGEEVDDENLKELFSQFGK.[T]	1xDeamidated [N10]; 2xTMT6plex [K12; K20]; 1xTMT6plex [N-Term]	1	1	2	W5QFP1	W5QFP1 [197-216]	1	3033.57	20	2.51767e+06	2.28286e+06	2.97554e+06	2228898	2.44868e+06	2.42363e+06		3	1011.86	7.805e-07	4.96
[R].NIDEHANEDVER.[M]	1xTMT6plex [N-Term]	1	2	3	W5QAY5	W5QAY5 [106-117]	0	1669.8	12	2.28794e+06	1.86767e+06	2.33015e+06	2.40617e+06	3.04066e+06	2.73574e+06		3	557.271	4.283e-05	3.56
[K].NIDEDELLGK.[L]	1xTMT6plex [K10]; 1xTMT6plex [N-Term]	1	1	3	W5QIH5	W5QIH5 [14-23]	0	1603.89	10	1.31646e+06	1.32465e+06	1.48378e+06	1.51143e+06	1.87625e+06	1.47032e+06		2	802.454	8.782e-05	3.07
[K].NGGQETIEMVK.[G]	1xDeamidated [N1]; 1xTMT6plex [K11]; 1xTMT6plex [N-Term]	1	1	10	W5PA64	W5PA64 [751-761]	0	1664.89	11	1.78914e+07	1.92152e+07	19171188	2.70821e+07	3.17735e+07	2.76736e+07		2	832.952	8.424e-06	3.52
[K].EVAEDELVAAEGLLK.[K]	1xTMT6plex [K15]; 1xTMT6plex [N-Term]	1	1	3	W5PVY4	W5PVY4 [1780-1794]	0	2044.16	15	275740	300404	267937	195270	181832	172895		3	682.057	9.018e-07	2.63
[K].EVAELEANLPCTCK.[V]	2xCarbamidomethyl [C11; C13]; 1xTMT6plex [K14]; 1xTMT6plex [N-Term]	1	1	1	W5QCA6	W5QCA6 [40-53]	0	2092.08	14	548193	433242	598408	571514	618736	577268		3	698.03	7.695e-05	3.22
[R].NGGFIHFDDTSEPPTETVR.[K]	1xDeamidated [N1]; 1xTMT6plex [N-Term]	1	1	1	W5NSA6	W5NSA6 [718-736]	0	2349.12	19	98620.8	78684.6	116890	110511	124966	103918		3	783.713	9.219e-06	3.26
[K].KFPGIPFPLDAAVECHR.[G]	1xCarbamidomethyl [C15]; 1xTMT6plex [K1]; 1xTMT6plex [N-Term]	1	1	11	W5QAB1	W5QAB1 [136-152]	1	2412.33	17	1.48139e+07	1.28461e+07	1.7647e+07	2.1165e+07	2.53331e+07	2.21143e+07		4	603.832	1.237e-07	4.91
[K].NGFSSVQATQLQTTQSVEGATGSAVK.[S]	3xDeamidated [N1; Q7; Q10]; 1xTMT6plex [K26]; 1xTMT6plex [N-Term]	1	1	1	W5NVV3	W5NVV3 [619-644]	0	3057.56	26	283206	263747	331707	271076	339715	294373		3	1019.87	4.25e-05	4.52
[K].EVAENQQNQTSDPEEEK.[G]	1xTMT6plex [K17]; 1xTMT6plex [N-Term]	1	2	2	W5PWQ4	W5PWQ4 [29-45]	0	2433.18	17	134061	123029	139950	160175	175770	166058		3	811.731	2.247e-05	4.19
[K].NGFSSVQATQLQTTQSVEGATGSAVK.[S]	2xDeamidated [Q7; Q10]; 1xTMT6plex [K26]; 1xTMT6plex [N-Term]	1	1	1	W5NVV3	W5NVV3 [619-644]	0	3056.58	26	488109	492064	490859	331033	343447	304731		3	1019.53	1.745e-05	3.5
[K].EVAEVNLWGTVR.[V]	1xTMT6plex [N-Term]	1	1	3	W5QGP1	W5QGP1 [163-174]	0	1601.88	12	2.57497e+06	2.33069e+06	2.96052e+06	3.18718e+06	3.42558e+06	3.19621e+06		2	801.447	4.203e-05	3.46
[K].EVAFFNNFLTDAK.[R]	1xTMT6plex [K13]; 1xTMT6plex [N-Term]	1	2	3	W5Q255	W5Q255 [746-758]	0	1974.07	13	7.94041e+06	8.4544e+06	9.70183e+06	8.55176e+06	1.01528e+07	9.48501e+06		2	987.532	2.449e-07	4.56
[K].EVAFWNELLSR.[E]	1xTMT6plex [N-Term]	1	1	5	W5QA37	W5QA37 [541-551]	0	1592.86	11	1.21614e+07	1.28933e+07	1.42683e+07	1.62927e+07	1.92952e+07	1.77209e+07		2	796.928	1.482e-05	3.47
[K].NGFSSVQATQLQTTQSVEGATGSAVK.[S]	1xDeamidated [N1]; 1xTMT6plex [K26]; 1xTMT6plex [N-Term]	1	1	1	W5NVV3	W5NVV3 [619-644]	0	3055.59	26	198942	187740	268377	202856	251952	253930		3	1019.2	1.472e-07	4.25
[R].EVALGVGIPEDAIFTMPDR.[G]	1xTMT6plex [N-Term]	1	1	3	W5P812	W5P812 [167-185]	0	2259.19	19	871544	749394	972264	1.26368e+06	1.27284e+06	1.14764e+06		2	1130.09	4.926e-07	4.98
[K].NGEVQNLAVK.[C]	1xDeamidated [N1]; 1xTMT6plex [K10]; 1xTMT6plex [N-Term]	1	2	6	W5NVQ4	W5NVQ4 [61-70]	0	1530.89	10	4.92462e+06	4566619	5.67337e+06	5.37566e+06	6.14663e+06	5.6786e+06		2	765.943	6.954e-05	3.25
[R].NGETVPVDEQFDKEK.[A]	1xDeamidated [N/Q]; 2xTMT6plex [K13; K15]; 1xTMT6plex [N-Term]	1	1	5	W5PVU0	W5PVU0 [370-384]	1	2423.29	15	3.69145e+06	3.35583e+06	4.27104e+06	4.71637e+06	5.44912e+06	4.96241e+06		3	808.427	9.575e-07	3.58
[R].NGETVPVDEQFDKEK.[A]	2xTMT6plex [K13; K15]; 1xTMT6plex [N-Term]	1	1	1	W5PVU0	W5PVU0 [370-384]	1	2422.31	15	560288	560894	625544	724187	867242	708819		3	808.104	1.103e-05	3.36
[R].EVAQGLCDAIR.[L]	1xCarbamidomethyl [C7]; 1xTMT6plex [N-Term]	1	1	2	W5Q9R2	W5Q9R2 [89-99]	0	1460.77	11	3.77385e+06	3.35475e+06	3.9168e+06	4.20888e+06	5.01969e+06	4.6377e+06		2	730.889	4.093e-05	3.99
[K].EVAQLSEAAPVPTETQASK.[L]	1xDeamidated [Q16]; 1xTMT6plex [K19]; 1xTMT6plex [N-Term]	1	1	1	W5QDA7	W5QDA7 [604-622]	0	2415.3	19	167015	145350	177252	194167	211354	180648		3	805.776	5.751e-05	2.09
[K].NGETGPQGPPGPTGPSGDK.[G]	2xDeamidated [N1; Q7]; 1xTMT6plex [K19]; 1xTMT6plex [N-Term]	1	2	8	W5Q4S0	W5Q4S0 [612-630]	0	2210.1	19	2.84587e+06	2.729e+06	3.48342e+06	3.93033e+06	3.81726e+06	3.4485e+06		3	737.368	4.131e-09	5.09
[K].NGETGPQGPPGPTGPSGDK.[G]	1xDeamidated [N/Q]; 1xTMT6plex [K19]; 1xTMT6plex [N-Term]	1	2	65	W5Q4S0	W5Q4S0 [612-630]	0	2209.11	19	1.1074e+08	1.19226e+08	9.81557e+07	1.30777e+08	1.3511e+08	1.04586e+08		2	1105.06	1.996e-10	3.19
[K].NGETGPQGPPGPTGPSGDK.[G]	1xTMT6plex [K19]; 1xTMT6plex [N-Term]	1	2	10	W5Q4S0	W5Q4S0 [612-630]	0	2208.13	19	6.6027e+07	5.25737e+07	6.78884e+07	6.17837e+07	7.36721e+07	7.52352e+07		2	1104.57	6.98e-09	3.7
[R].LEFESLEALK.[Q]	1xTMT6plex [K10]; 1xTMT6plex [N-Term]	1	1	1	W5P1T1	W5P1T1 [627-636]	0	1636.96	10	2.14184e+06	2188978	2.63811e+06	2298367	2.56866e+06	2.39703e+06		2	818.975	7.625e-05	3.02
[R].KFNALFAQGNYSEAAK.[V]	2xTMT6plex [K1; K16]; 1xTMT6plex [N-Term]	1	1	1	W5PUT6	W5PUT6 [370-385]	1	2446.37	16	3.01277e+06	3.00509e+06	3.62735e+06	3554028	4455035	4.37449e+06		3	816.128	3.206e-06	5.29
[K].EVAEAYEVLSDPK.[K]	1xTMT6plex [K13]; 1xTMT6plex [N-Term]	1	1	3	W5PV03	W5PV03 [54-66]	0	1908.04	13	618656	615577	697976	704677	729418	651781		2	954.518	2.742e-05	2.64
[K].EVAEAYEVLSDKR.[K]	1xTMT6plex [K12]; 1xTMT6plex [N-Term]	1	1	3	W5QFN1	W5QFN1 [48-60]	1	1967.08	13	1.53937e+06	2.4113e+06	2.18633e+06	1.90693e+06	2.13583e+06	1.87403e+06		3	656.364	5.192e-07	3.73
[R].NGGQILVADLR.[G]	1xDeamidated [N1]; 1xTMT6plex [N-Term]	1	1	11	W5PPQ6	W5PPQ6 [44-54]	0	1385.79	11	9.08347e+06	8.78459e+06	1.08492e+07	8.62644e+06	1.02724e+07	9.22654e+06		2	693.4	2.671e-05	3.05
[R].EVADGLCLEVEGK.[M]	1xCarbamidomethyl [C7]; 1xTMT6plex [K13]; 1xTMT6plex [N-Term]	1	2	15	K4P438	K4P438 [22-34]	0	1877.01	13	6.63843e+06	5.67992e+06	7.71983e+06	7.73926e+06	9.03778e+06	7.65696e+06		2	939.005	3.107e-08	3.16
[R].ETVSEESNVLCLSK.[S]	1xCarbamidomethyl [C11]; 1xTMT6plex [K14]; 1xTMT6plex [N-Term]	1	2	14	W5PN84	W5PN84 [697-710]	0	2053.09	14	2.46322e+07	2.13588e+07	2.91036e+07	2.72471e+07	2.87543e+07	2.47864e+07		2	1027.05	1.104e-08	4.59
[R].IEFDNDADPSSESKEDQWMGVTVQSQGPGGK.[V]	2xTMT6plex [K14; K31]; 1xTMT6plex [N-Term]	1	1	2	W5NSV3	W5NSV3 [36-66]	1	4025.96	31	755038	753142	849398	986407	969321	984600		4	1007.24	1.186e-06	5.43
[K].NGPVEGAFSVYSDFLLYK.[S]	1xTMT6plex [K18]; 1xTMT6plex [N-Term]	1	1	1	P83205	P83205 [246-263]	0	2464.32	18	732285	645083	775422	752315	783915	656463		2	1232.65	5.814e-07	4.04
[K].ETVTTCGEGER.[C]	1xCarbamidomethyl [C6]; 1xTMT6plex [N-Term]	1	1	3	W5P798	W5P798 [37-47]	0	1467.69	11	4.13527e+06	3.71515e+06	4.2248e+06	5.87637e+06	6.61358e+06	5.83842e+06		2	734.351	8.531e-06	3.8
[R].ETVVEVPQVTWEDIGGLEDVK.[R]	1xTMT6plex [K21]; 1xTMT6plex [N-Term]	1	1	2	W5PRJ4	W5PRJ4 [466-486]	0	2800.5	21	554953	570713	707247	957203	913493	901537		3	934.167	2.806e-07	5.51
[R].ETVVEVPQVTWEDIGGLEDVKR.[E]	1xTMT6plex [K21]; 1xTMT6plex [N-Term]	1	1	6	W5PRJ4	W5PRJ4 [466-487]	1	2956.6	22	8.23951e+06	7.3207e+06	9.72128e+06	8.44958e+06	8.97584e+06	8.66822e+06		3	986.199	1.08e-14	6.99
[R].ETVVEVPQVTWEDIGGLEDVKR.[E]	1xDeamidated [Q8]; 1xTMT6plex [K21]; 1xTMT6plex [N-Term]	1	1	1	W5PRJ4	W5PRJ4 [466-487]	1	2957.59	22	328198	258111	350809	338665	352853	311006		4	740.154	6.633e-05	4.25
[R].NGPLPIPSEGSGFTK.[L]	1xDeamidated [N1]; 1xTMT6plex [K15]; 1xTMT6plex [N-Term]	1	2	3	W5P9T6	W5P9T6 [818-832]	0	1960.08	15	1.92219e+06	1.69297e+06	2.22316e+06	2.06468e+06	2.28876e+06	2.10942e+06		2	980.539	3.231e-05	3
[R].NGPALLEAYER.[V]	1xDeamidated [N1]; 1xTMT6plex [N-Term]	1	1	8	W5PVX4	W5PVX4 [8-18]	0	1462.77	11	2.21272e+06	1.81294e+06	2.56662e+06	2.6867e+06	2.87535e+06	2.60706e+06		2	731.894	0.0001155	2.77
[R].NGPALLEAYER.[V]	1xTMT6plex [N-Term]	1	1	1	W5PVX4	W5PVX4 [8-18]	0	1461.79	11	505696	460412	539125	560541	648510	562655		2	731.397	8.026e-05	2.72
[R].NGNQAFNEDNLK.[F]	1xDeamidated [N1]; 1xTMT6plex [K12]; 1xTMT6plex [N-Term]	1	1	5	W5P5I4	W5P5I4 [59-70]	0	1822.93	12	3.46293e+06	2.97589e+06	4.14119e+06	3.53123e+06	4.01546e+06	3.96679e+06		2	911.964	1.643e-06	3.76
[K].EVASNTEMIQTSK.[S]	1xTMT6plex [K13]; 1xTMT6plex [N-Term]	2	2	14	O77727; W5Q6A4	O77727 [305-317]; W5Q6A4 [310-322]	0	1896.01	13	1.73574e+07	1.86436e+07	1.72884e+07	2.20288e+07	2.62011e+07	2.35524e+07	Shared	2	948.508	7.423e-08	5.17
[R].NGNPNGEGLPHWPAYDHK.[E]	2xDeamidated [N3; N]; 1xTMT6plex [K18]; 1xTMT6plex [N-Term]	1	1	5	W5QA37	W5QA37 [504-521]	0	2463.21	18	2.08402e+06	2.00894e+06	2.2816e+06	2.52538e+06	2.77198e+06	2.54562e+06		4	616.555	4.443e-05	3.92
[R].NGLVNGEVHNEDGR.[S]	2xDeamidated [N1; N5]; 1xTMT6plex [N-Term]	1	1	2	W5PBF7	W5PBF7 [29-42]	0	1740.84	14	440570	424100	469638	394584	417233	389825		3	580.95	7.041e-05	1.82
[R].NGIPVTDGVSQTVFLPR.[D]	2xDeamidated [N1; Q11]; 1xTMT6plex [N-Term]	1	8	1	I6W7C1	I6W7C1 [148-164]	0	2031.1	17	767926	812844	897206	1.78562e+06	2077934	1.90173e+06		2	1016.06	4.28e-07	3.46
[R].NGIPVTDGVSQTVFLPR.[D]	1xDeamidated [N1]; 1xTMT6plex [N-Term]	1	8	3	I6W7C1	I6W7C1 [148-164]	0	2030.11	17	3.18045e+06	3.26962e+06	3.17251e+06	4.72172e+06	5.56907e+06	5.18656e+06		2	1015.55	7.366e-08	4.08
[R].ETYGDMADCCEK.[Q]	2xCarbamidomethyl [C9; C10]; 1xTMT6plex [K12]; 1xTMT6plex [N-Term]	2	2	166	W5PWE9; P14639	W5PWE9 [106-117]; P14639 [106-117]	0	1936.85	12	7.61211e+08	5.05527e+08	7.39745e+08	7.28414e+08	7.85815e+08	6.12437e+08	Shared	2	968.929	1.679e-07	4.05
[R].ETYGDMADCCEK.[Q]	2xCarbamidomethyl [C9; C10]; 1xOxidation [M6]; 1xTMT6plex [K12]; 1xTMT6plex [N-Term]	2	2	91	W5PWE9; P14639	W5PWE9 [106-117]; P14639 [106-117]	0	1952.84	12	1.43312e+08	9.8671e+07	1.71102e+08	1.37232e+08	1.4651e+08	1.11892e+08	Shared	3	651.619	5.598e-05	3.63
[R].NGLPDHTDPEDNEIVCFLK.[V]	1xCarbamidomethyl [C16]; 1xDeamidated [N1]; 1xTMT6plex [K19]; 1xTMT6plex [N-Term]	1	1	2	W5PTE5	W5PTE5 [1128-1146]	0	2672.33	19	648649	657605	783369	964040	1.02467e+06	958240		3	891.448	1.14e-05	3.47
[R].NGLLTEHNICEVNGQNVIGLK.[D]	1xCarbamidomethyl [C10]; 2xDeamidated [N1; N8]; 1xTMT6plex [K21]; 1xTMT6plex [N-Term]	1	1	1	W5Q1W2	W5Q1W2 [292-312]	0	2782.48	21	429431	402879	514949	605808	593477	572027		3	928.158	4.57e-05	3.41
[K].EVAAEETAKPGPDK.[G]	2xTMT6plex [K9; K14]; 1xTMT6plex [N-Term]	1	1	2	W5PKQ5	W5PKQ5 [1278-1291]	0	2129.21	14	1.01053e+06	896875	1.00771e+06	922906	1.09805e+06	860414		3	710.406	4.196e-05	3.92
[R].EVAAFAQFGSDLDAATQQLLSR.[G]	1xTMT6plex [N-Term]	1	2	4	W5NY50	W5NY50 [442-463]	0	2567.33	22	3.7993e+06	3.56159e+06	4.29547e+06	3.80755e+06	4.50143e+06	4.1161e+06		2	1284.16	2.716e-12	6.75
[R].NGIHDLDNISFPK.[Q]	1xDeamidated [N1]; 1xTMT6plex [K13]; 1xTMT6plex [N-Term]	1	1	7	W5QE19	W5QE19 [187-199]	0	1929.05	13	4.79875e+06	4.51551e+06	5.34477e+06	5.62631e+06	6.33398e+06	5.59126e+06		2	965.022	9.452e-06	2.67
[K].NGGSPALNNNPR.[K]	1xDeamidated [N1]; 1xTMT6plex [N-Term]	1	1	3	W5PD88	W5PD88 [16-27]	0	1440.74	12	1.28955e+06	1.28344e+06	1.39254e+06	1.30408e+06	1.36488e+06	1.25073e+06		2	720.87	4.131e-06	3.85
[K].NGNLPEFGEAVATASK.[A]	1xDeamidated [N1]; 1xTMT6plex [K16]; 1xTMT6plex [N-Term]	1	1	9	W5PQK6	W5PQK6 [1411-1426]	0	2064.1	16	7.82044e+06	7.30548e+06	8.56592e+06	7.72758e+06	8575372	7.81679e+06		3	688.704	1.207e-06	3.86
[K].ETVPEVPPLLFSDEEEK.[A]	1xTMT6plex [K17]; 1xTMT6plex [N-Term]	1	1	2	W5NX08	W5NX08 [710-726]	0	2416.29	17	161877	137770	208574	332400	374275	300022		3	806.1	9.78e-05	3.04
[K].EVASNTEMIQTSK.[S]	1xDeamidated [N/Q]; 1xTMT6plex [K13]; 1xTMT6plex [N-Term]	2	2	5	O77727; W5Q6A4	O77727 [305-317]; W5Q6A4 [310-322]	0	1897	13	2.26114e+06	2.16706e+06	2.45827e+06	2.43553e+06	2.52542e+06	2.20866e+06	Shared	2	949	1.306e-06	3.63
[K].NGEFFMSPNDFVTR.[Y]	2xDeamidated [N1; N9]; 1xTMT6plex [N-Term]	1	1	1	W5P1S3	W5P1S3 [30-43]	0	1891.87	14							No Quan Values	2	946.445	9.714e-05	2.07
[K].NFYNEHEEITNLTPQQLIDLR.[H]	1xTMT6plex [N-Term]	1	1	1	W5PVN5	W5PVN5 [216-236]	0	2816.44	21	511225	435967	549900	514923	583761	542480		3	939.482	5.992e-05	3.45
[R].NFWVSGLSSTTR.[A]	1xTMT6plex [N-Term]	1	2	1	W5PCR3	W5PCR3 [407-418]	0	1583.84	12	2.80818e+06	2.51075e+06	3.17566e+06	3.10087e+06	3.58839e+06	3421814		2	792.417	4.592e-05	4.03
[R].NFVDSPIIVDIAK.[D]	1xTMT6plex [K13]; 1xTMT6plex [N-Term]	1	1	1	W5P1A5	W5P1A5 [435-447]	0	1889.11	13	3.05604e+06	3478272	3274094	4.14285e+06	4.01461e+06	3.20164e+06		2	945.056	5.621e-05	2.4
[K].NFSGAELEGLVR.[A]	1xTMT6plex [N-Term]	1	1	1	W5PMS2	W5PMS2 [430-441]	0	1520.83	12	1.10144e+06	1.07736e+06	1345809	1.29319e+06	1.40214e+06	1392175		2	760.916	1.807e-05	3.1
[K].EVDPQVNWEALVEEK.[L]	1xTMT6plex [K15]; 1xTMT6plex [N-Term]	1	1	4	W5P352	W5P352 [113-127]	0	2243.2	15	608959	581787	663444	662602	726078	607540		2	1122.1	4.015e-07	2.47
[K].NFPNAIEHTLQWAR.[D]	1xTMT6plex [N-Term]	1	2	7	W5PVT6	W5PVT6 [636-649]	0	1926.02	14	20672920	1.61537e+07	2.33187e+07	2.00209e+07	2.37386e+07	2.18557e+07		3	642.672	9.847e-07	5.52
[K].NFNNVPYMVGINK.[Q]	1xTMT6plex [K13]; 1xTMT6plex [N-Term]	1	1	3	W5QA37	W5QA37 [339-351]	0	1968.08	13	4478089	4.36028e+06	4.97051e+06	5.08179e+06	5.79887e+06	5.19158e+06		2	984.544	6.738e-07	3.47
[R].KFLEQEEQLHREEQEELR.[R]	1xTMT6plex [K1]; 1xTMT6plex [N-Term]	2	2	3	P22793; W5QIV5	P22793 [1419-1436]; W5QIV5 [1329-1346]	2	2828.49	18	2.07039e+06	1.9673e+06	2.32042e+06	2.08221e+06	2.31485e+06	2.09123e+06	Shared	4	707.877	1.415e-05	3.43
[K].NFINNPVAQADWAAK.[K]	1xDeamidated [N1]; 1xTMT6plex [K15]; 1xTMT6plex [N-Term]	1	2	2	W5PGT5	W5PGT5 [27-41]	0	2118.14	15	3.97574e+06	4166891	4.25971e+06	4.18269e+06	4.72747e+06	4.39155e+06		2	1059.57	3.319e-06	3.01
[R].EVDTEYEAR.[S]	1xTMT6plex [N-Term]	1	1	5	W5P566	W5P566 [415-423]	0	1340.65	9	728568	622810	779217	663505	738042	550342		2	670.83	6.792e-05	2.5
[K].NFINNPVAQADWAAK.[K]	1xTMT6plex [K15]; 1xTMT6plex [N-Term]	1	2	4	W5PGT5	W5PGT5 [27-41]	0	2117.15	15	6.75854e+06	7.37759e+06	6.97234e+06	3.66842e+06	4.07215e+06	4.0139e+06		2	1059.07	7.473e-09	5.1
[K].EVDVGLAADVGTLQR.[L]	1xTMT6plex [N-Term]	1	1	4	W5P772	W5P772 [257-271]	0	1771.98	15	533761	483388	583707	632993	702210	688777		2	886.491	5.423e-05	3.08
[R].EVDYLETQNPALPCVEVDEK.[V]	1xCarbamidomethyl [C14]; 1xTMT6plex [K20]; 1xTMT6plex [N-Term]	1	1	3	W5QFB2	W5QFB2 [93-112]	0	2806.42	20	435721	371617	505702	500772	490115	535507		4	702.359	9.131e-06	4.09
[R].EVDYLETQNPALPCVEVDEK.[V]	1xCarbamidomethyl [C14]; 1xDeamidated [N9]; 1xTMT6plex [K20]; 1xTMT6plex [N-Term]	1	1	2	W5QFB2	W5QFB2 [93-112]	0	2807.41	20	249455	230981	223096	227705	215214	201433		3	936.481	9.885e-06	4.34
[K].NFINNPLAQADWAAK.[K]	1xDeamidated [N]; 1xTMT6plex [K15]; 1xTMT6plex [N-Term]	1	1	3	W5QBQ9	W5QBQ9 [15-29]	0	2132.15	15	3.62278e+06	3.42936e+06	4.01037e+06	4.4451e+06	4.85266e+06	4.44975e+06		2	1066.58	3.541e-06	3.22
[K].NFINNPLAQADWAAK.[K]	1xTMT6plex [K15]; 1xTMT6plex [N-Term]	1	1	8	W5QBQ9	W5QBQ9 [15-29]	0	2131.17	15	1.76079e+07	1.70989e+07	1.9837e+07	2.39174e+07	2.81139e+07	2.54992e+07		2	1066.08	2.505e-08	4.69
[R].NFILDQTNVSAAAQR.[R]	1xDeamidated [N/Q]; 1xTMT6plex [N-Term]	1	1	4	W5P4I9	W5P4I9 [492-506]	0	1877.99	15	4.32989e+06	4.35013e+06	4.81182e+06	4.80905e+06	5.76632e+06	5.47764e+06		2	939.496	2.284e-06	3.09
[R].NFILDQTNVSAAAQR.[R]	1xTMT6plex [N-Term]	1	1	8	W5P4I9	W5P4I9 [492-506]	0	1877.01	15	1.58482e+07	1.54413e+07	1.86826e+07	1.96688e+07	2.50086e+07	2.35921e+07		2	939.002	8.741e-07	4.8
[K].NFGIGQDIQPK.[R]	1xDeamidated [N/Q]; 1xTMT6plex [K11]; 1xTMT6plex [N-Term]	2	2	2	W5P0H3; W5P381	W5P0H3 [38-48]; W5P381 [41-51]	0	1675.94	11	1.00597e+06	876316	1.09767e+06	1.01142e+06	1149569	1.15109e+06	Shared	2	838.471	9.439e-05	3.09
[K].NFGIGQDIQPK.[R]	1xTMT6plex [K11]; 1xTMT6plex [N-Term]	2	2	10	W5P0H3; W5P381	W5P0H3 [38-48]; W5P381 [41-51]	0	1674.96	11	3.10768e+07	2.86053e+07	3.60637e+07	3.55562e+07	4.30824e+07	4.07737e+07	Shared	2	837.976	3.982e-05	2.49
[K].EVEELEQLTQK.[L]	1xTMT6plex [K11]; 1xTMT6plex [N-Term]	1	1	7	W5Q9H1	W5Q9H1 [344-354]	0	1804.01	11	3.50299e+06	3.51483e+06	4.10206e+06	4.23026e+06	4.97783e+06	4.514e+06		2	902.507	2.738e-06	4.33
[K].EVEELEQLTQK.[L]	1xDeamidated [Q7]; 1xTMT6plex [K11]; 1xTMT6plex [N-Term]	1	1	1	W5Q9H1	W5Q9H1 [344-354]	0	1804.99	11	618360	539252	740709	715852	782564	753827		2	903.008	7.421e-05	3.47
[K].EVEELILTESK.[K]	1xTMT6plex [K11]; 1xTMT6plex [N-Term]	1	1	2	W5NPT5	W5NPT5 [171-181]	0	1748.01	11	957848	853770	1.038e+06	851378	1.01266e+06	931730		2	874.509	2.39e-06	4.05
[K].NGDRGETGPAGPSGAPGPAGSR.[G]	1xTMT6plex [N-Term]	1	1	7	W5Q4S0	W5Q4S0 [1062-1083]	1	2194.08	22	5.95714e+06	4.98572e+06	6.71103e+06	4.93406e+06	5.14093e+06	4.26432e+06		3	732.029	3.267e-10	6.22
[K].EVDILISTALIPGK.[K]	1xTMT6plex [K14]; 1xTMT6plex [N-Term]	1	2	2	W5PFI3	W5PFI3 [310-323]	0	1927.19	14	6.48524e+06	5.18496e+06	5.18508e+06	4.99128e+06	5.5553e+06	4.76413e+06		2	964.092	3.543e-05	2.82
[R].EVDIGIPDATGR.[L]	1xTMT6plex [N-Term]	1	1	10	W5PRJ4	W5PRJ4 [366-377]	0	1471.8	12	2.31196e+07	2.17881e+07	2.66314e+07	2.44706e+07	2.946e+07	2.54675e+07		2	736.4	6.722e-06	3.43
[K].NGDRGETGPAGPSGAPGPAGSR.[G]	1xDeamidated [N1]; 1xTMT6plex [N-Term]	1	1	16	W5Q4S0	W5Q4S0 [1062-1083]	1	2195.06	22	9.94538e+06	8.82487e+06	9.73587e+06	7.3074e+06	8.49505e+06	7.65424e+06		3	732.359	3.556e-11	7.13
[R].NGEDQLQDMELVETRPSGDGTFQK.[W]	1xDeamidated [Q7]; 1xTMT6plex [K24]; 1xTMT6plex [N-Term]	3	24	1	A0A1Z1VUP7; A0A2P9DU36; R9WH56	A0A1Z1VUP7 [244-267]; A0A2P9DU36 [235-258]; R9WH56 [241-264]	0	3153.54	24	108786	95056.1	115635	242972	282067	298144	Shared	3	1051.86	7.703e-06	2.81
[R].NGEDQLQDMELVETRPSGDGTFQK.[W]	1xTMT6plex [K24]; 1xTMT6plex [N-Term]	3	24	3	A0A1Z1VUP7; A0A2P9DU36; R9WH56	A0A1Z1VUP7 [244-267]; A0A2P9DU36 [235-258]; R9WH56 [241-264]	0	3152.56	24	302526	251190	301358	575889	580973	561795	Shared	4	788.89	2.57e-05	2.97
[R].EVATNSELVQSGK.[S]	1xTMT6plex [K13]; 1xTMT6plex [N-Term]	2	4	35	U3MXA9; W5Q6L8	U3MXA9 [293-305]; W5Q6L8 [281-293]	0	1820.02	13	3.07182e+08	3.00313e+08	3.27785e+08	4.96912e+08	5.70461e+08	5.2114e+08	Shared	2	910.507	1.174e-07	4.48
[R].EVATNSELVQSGK.[S]	1xDeamidated [N/Q]; 1xTMT6plex [K13]; 1xTMT6plex [N-Term]	2	4	61	U3MXA9; W5Q6L8	U3MXA9 [293-305]; W5Q6L8 [281-293]	0	1821	13	8.16635e+07	7.79009e+07	8.61439e+07	1.32202e+08	1.4786e+08	1.47009e+08	Shared	2	911.004	1.459e-07	4.36
[R].EVATNSELVQSGKSEISELR.[R]	1xTMT6plex [K13]; 1xTMT6plex [N-Term]	2	4	2	U3MXA9; W5Q6L8	U3MXA9 [293-312]; W5Q6L8 [281-300]	1	2634.44	20	1.80951e+06	1.58521e+06	1.90951e+06	2.44479e+06	2.59053e+06	2.33086e+06	Shared	3	878.809	3.7e-09	3.95
[K].EVCCPVPNLNNDGSITLR.[R]	2xCarbamidomethyl [C3; C4]; 1xTMT6plex [N-Term]	1	2	1	W5PBY0	W5PBY0 [378-395]	0	2287.14	18	157398	117414	224704	341753	357948	281502		2	1144.07	1.799e-05	3.16
[K].EVCFACVDGK.[E]	2xCarbamidomethyl [C3; C6]; 1xTMT6plex [K10]; 1xTMT6plex [N-Term]	1	1	3	W5PUT6	W5PUT6 [1258-1267]	0	1642.83	10	1.54821e+07	1.5405e+07	1.64481e+07	1.57552e+07	1.73016e+07	1.55981e+07		2	821.915	4.934e-05	3.72
[K].NGEDLGVAFR.[I]	1xDeamidated [N1]; 1xTMT6plex [N-Term]	1	1	3	W5Q5S5	W5Q5S5 [380-389]	0	1307.68	10	568501	503316	640035	578848	621978	621023		2	654.337	8.71e-05	2.46
[R].NGDTCVTLLDLELYNPK.[G]	1xCarbamidomethyl [C5]; 1xDeamidated [N1]; 1xTMT6plex [K17]; 1xTMT6plex [N-Term]	1	1	1	W5PBS4	W5PBS4 [284-300]	0	2424.27	17	396068	360836	410318	373952	413743	384024		3	808.758	1.342e-05	4.06
[K].IEFPILDDSSELQVK.[A]	1xTMT6plex [K15]; 1xTMT6plex [N-Term]	1	1	5	W5P8E9	W5P8E9 [427-441]	0	2191.23	15	2.84299e+06	2.88615e+06	3.34013e+06	4.16419e+06	4.58789e+06	4.13865e+06		2	1096.11	8.205e-08	3.48
[R].EVCSEQAETGPCR.[A]	2xCarbamidomethyl [C3; C12]; 1xTMT6plex [N-Term]	1	1	3	W5Q0C6	W5Q0C6 [289-301]	0	1751.79	13	757570	695428	875098	983839	1.1491e+06	1.02127e+06		2	876.401	6.876e-07	2.88
[R].NGEGAMYVPDDLLPVYR.[E]	1xDeamidated [N1]; 1xTMT6plex [N-Term]	1	3	4	P82197	P82197 [121-137]	0	2139.06	17	601783	491871	603420	534576	507427	528268		2	1070.04	8.823e-05	2.92
[K].NGDSVMVLPTIPEEEAKK.[L]	1xDeamidated [N1]; 2xTMT6plex [K17; K18]; 1xTMT6plex [N-Term]	1	2	7	M4T8F1	M4T8F1 [183-200]	1	2645.47	18	4.16349e+06	3.64135e+06	4.73046e+06	4.56614e+06	5140982	5.11522e+06		3	882.494	7.518e-07	4.33
[K].EVDDFFEQEK.[T]	1xTMT6plex [K10]; 1xTMT6plex [N-Term]	1	1	5	W5Q9H8	W5Q9H8 [204-213]	0	1743.88	10	1.46069e+06	1.30967e+06	1.60426e+06	1.23428e+06	1.42938e+06	1.25838e+06		2	872.451	8.515e-06	2.74
[K].EVDEDFDSK.[L]	1xTMT6plex [K9]; 1xTMT6plex [N-Term]	1	1	9	W5PK33	W5PK33 [139-147]	0	1541.77	9	4.17346e+06	3.68209e+06	4.87444e+06	4.58704e+06	5.98831e+06	4.792e+06		2	771.387	0.0001145	3.11
[K].EVDEGAWETK.[I]	1xTMT6plex [K10]; 1xTMT6plex [N-Term]	1	1	5	W5P2K6	W5P2K6 [90-99]	0	1621.85	10	3.5658e+06	3.5708e+06	3.83131e+06	4.23225e+06	4.68115e+06	4.48951e+06		2	811.423	6.214e-05	3.46
[K].NGDSVMVLPTIPEEEAK.[K]	1xDeamidated [N1]; 1xOxidation [M6]; 1xTMT6plex [K17]; 1xTMT6plex [N-Term]	1	2	14	M4T8F1	M4T8F1 [183-199]	0	2304.2	17	3.01296e+06	2.67794e+06	3.44087e+06	3.23399e+06	3.65583e+06	3.33147e+06		3	768.738	0.0001131	3.22
[K].EVDELSQSFQTTK.[D]	1xTMT6plex [K13]; 1xTMT6plex [N-Term]	1	1	4	W5NZ80	W5NZ80 [376-388]	0	1970.05	13	3.63637e+06	3.30479e+06	4.07597e+06	4.54476e+06	5.08471e+06	4.66168e+06		2	985.523	4.698e-06	3.75
[K].EVDEQMLAIQSK.[N]	1xTMT6plex [K12]; 1xTMT6plex [N-Term]	1	2	3	W5Q039	W5Q039 [325-336]	0	1849.01	12	1.62387e+06	1.57701e+06	1.68395e+06	1.98602e+06	2.31196e+06	2.10373e+06		2	925.004	8.706e-06	4.16
[K].EVDEQMLNVQNK.[N]	1xTMT6plex [K12]; 1xTMT6plex [N-Term]	4	6	22	W5NSS8; W5PPT6; W5NUI0; D0VWY9	W5NSS8 [307-318]; W5PPT6 [325-336]; W5NUI0 [251-262]; D0VWY9 [325-336]	0	1905.02	12	7.30155e+07	6.66941e+07	7.65213e+07	8.0191e+07	9.41213e+07	8.12449e+07	Shared	2	953.01	2.237e-06	4.22
[K].EVDEQMLNVQNK.[N]	1xDeamidated [N/Q]; 1xTMT6plex [K12]; 1xTMT6plex [N-Term]	4	6	22	W5NSS8; W5PPT6; W5NUI0; D0VWY9	W5NSS8 [307-318]; W5PPT6 [325-336]; W5NUI0 [251-262]; D0VWY9 [325-336]	0	1906	12	8.84369e+06	7.99751e+06	9.70178e+06	9.69536e+06	1.10412e+07	1.07558e+07	Shared	2	953.498	6.336e-06	3.11
[K].NGDSVMVLPTIPEEEAK.[K]	1xDeamidated [N1]; 1xTMT6plex [K17]; 1xTMT6plex [N-Term]	1	2	6	M4T8F1	M4T8F1 [183-199]	0	2288.21	17	3.83504e+06	3.40665e+06	4.16938e+06	4.4999e+06	5.18437e+06	4.82548e+06		2	1144.61	5.029e-06	3.87
[K].EVDEQMLNVQNK.[N]	1xOxidation [M6]; 1xTMT6plex [K12]; 1xTMT6plex [N-Term]	4	6	23	W5NSS8; W5PPT6; W5NUI0; D0VWY9	W5NSS8 [307-318]; W5PPT6 [325-336]; W5NUI0 [251-262]; D0VWY9 [325-336]	0	1921.01	12	1.91278e+07	1.74084e+07	2.74363e+07	1.97227e+07	2.2196e+07	1.87253e+07	Shared	2	961.007	6.575e-07	2.79
[K].NGDSVMVLPTIPEEEAK.[K]	1xTMT6plex [K17]; 1xTMT6plex [N-Term]	1	2	3	M4T8F1	M4T8F1 [183-199]	0	2287.23	17	1.56096e+06	1.31907e+06	1.92273e+06	1.81327e+06	2.02397e+06	2.24485e+06		2	1144.13	3.298e-06	2.93
[K].EVDAQPVSQKPPPPSEK.[V]	1xDeamidated [Q9]; 2xTMT6plex [K10; K17]; 1xTMT6plex [N-Term]	1	2	1	W5NYH4	W5NYH4 [346-362]	0	2521.41	17	971970	891129	1.08573e+06	1.06478e+06	1.26672e+06	1.06551e+06		3	841.146	3.487e-05	3.72
[R].ETVPEDAEGTAPVR.[W]	1xTMT6plex [N-Term]	1	1	5	W5PE67	W5PE67 [408-421]	0	1699.87	14	400997	392904	404007	973354	734886	624498		2	850.438	7.892e-05	2.53
[K].NGQDLGIAFK.[I]	1xTMT6plex [K10]; 1xTMT6plex [N-Term]	1	1	3	W5P4I9	W5P4I9 [338-347]	0	1520.88	10	8.18076e+06	7.63222e+06	8.68423e+06	8.98444e+06	1.05468e+07	8.85769e+06		2	760.941	7.383e-05	4.43
[K].ETVNETGFQLK.[A]	1xTMT6plex [K11]; 1xTMT6plex [N-Term]	1	1	2	W5QG87	W5QG87 [142-152]	0	1723.96	11	1.77296e+06	1.76435e+06	2438236	1.77116e+06	2.08904e+06	2.92575e+06		2	862.48	3.317e-06	3.76
[K].NKYEDEINKR.[T]	2xTMT6plex [K2; K9]; 1xTMT6plex [N-Term]	3	4	10	W5Q6D3; W5Q687; W5Q6B8	W5Q6D3 [252-261]; W5Q687 [235-244]; W5Q6B8 [231-240]	2	1996.14	10	7.36746e+07	6.90783e+07	8.75297e+07	9.18136e+07	9.77122e+07	1.06572e+08	Shared	3	666.051	7.921e-06	3.13
[K].ETILAECQGMIK.[R]	1xCarbamidomethyl [C7]; 1xTMT6plex [K12]; 1xTMT6plex [N-Term]	1	1	1	W5PMI8	W5PMI8 [275-286]	0	1851.01	12	722871	653048	792106	785990	904733	820156		2	926.003	7.569e-06	2.6
[R].NKILTATVDNANVVLQIDNAR.[L]	1xDeamidated [N]; 1xTMT6plex [K2]; 1xTMT6plex [N-Term]	1	1	4	W5Q6L8	W5Q6L8 [139-159]	1	2741.56	21	6778499	6.07583e+06	8.31233e+06	12369229	8.7247e+06	1.30736e+07		3	914.518	2.229e-08	6.82
[R].NKILTATVDNANVVLQIDNAR.[L]	1xTMT6plex [K2]; 1xTMT6plex [N-Term]	1	1	6	W5Q6L8	W5Q6L8 [139-159]	1	2740.57	21	8.27182e+06	7.59527e+06	1.00643e+07	1.66774e+07	1.07827e+07	1.69581e+07		3	914.191	9.135e-10	7.01
[R].NKILTATVDNANILLQIDNAR.[L]	1xTMT6plex [K2]; 1xTMT6plex [N-Term]	1	2	10	U3MXA9	U3MXA9 [151-171]	1	2768.6	21	1.30509e+07	1.22855e+07	1.47064e+07	2.15138e+07	1.59956e+07	2.24733e+07		3	923.535	1.052e-10	6.4
[R].NKLAELEDALQK.[A]	2xTMT6plex [K2; K12]; 1xTMT6plex [N-Term]	1	1	1	W5Q687	W5Q687 [409-420]	1	2059.24	12	1.63107e+06	1.41408e+06	1.89023e+06	1.99059e+06	2.17374e+06	2.37692e+06		3	687.079	4.384e-05	2.87
[R].ETLLNSAATSLNSK.[V]	1xTMT6plex [K14]; 1xTMT6plex [N-Term]	2	2	4	W5QFZ3; W5PHP4	W5QFZ3 [124-137]; W5PHP4 [145-158]	0	1907.08	14	5.93087e+06	5.69871e+06	6.463e+06	7.22012e+06	8.7964e+06	7.89367e+06	Shared	2	954.045	2.985e-07	4.28
[R].ETLLNSAATSLNSK.[V]	1xDeamidated [N]; 1xTMT6plex [K14]; 1xTMT6plex [N-Term]	2	2	4	W5QFZ3; W5PHP4	W5QFZ3 [124-137]; W5PHP4 [145-158]	0	1908.07	14	4.78914e+06	4.42833e+06	5.29462e+06	5.28738e+06	5.86384e+06	5.39501e+06	Shared	2	954.546	4.364e-05	3.31
[K].NKHEAMITDLEER.[L]	1xTMT6plex [K2]; 1xTMT6plex [N-Term]	1	1	5	W5QBQ9	W5QBQ9 [1025-1037]	1	2044.09	13	1.35871e+07	1.27871e+07	15495867	1.38271e+07	1.59476e+07	1.39705e+07		3	682.031	1.122e-05	3
[K].NKEEAAEYAK.[L]	2xTMT6plex [K2; K10]; 1xTMT6plex [N-Term]	1	3	4	W5PXV8	W5PXV8 [202-211]	1	1840.04	10	33320413	2.96936e+07	3.42618e+07	30530638	3.35168e+07	3.15595e+07		3	614.018	2.817e-05	3.88
[R].ETLPAEQDLTTK.[N]	1xTMT6plex [K12]; 1xTMT6plex [N-Term]	1	1	23	W5P9U4	W5P9U4 [197-208]	0	1804.01	12	1.47735e+07	1.22518e+07	1.61255e+07	1.47172e+07	1.66703e+07	1.61545e+07		2	902.508	3.4e-07	4.41
[K].NKEDQYDHLDAADMLK.[V]	2xTMT6plex [K2; K16]; 1xTMT6plex [N-Term]	1	1	2	W5PVL5	W5PVL5 [719-734]	1	2593.35	16	2.02375e+06	1.75378e+06	2.18723e+06	2276571	2.47866e+06	2.2161e+06		3	865.121	1.927e-05	4.58
[K].NKDTGTYEDFVEGLR.[V]	1xTMT6plex [K2]; 1xTMT6plex [N-Term]	1	2	1	A0A0U1Z4T4	A0A0U1Z4T4 [128-142]	1	2202.14	15	1.53747e+06	1.30963e+06	2.432e+06	1.07216e+06	1.73073e+06	1064087		3	734.715	4.37e-05	3.17
[K].ETIPLQESTLYTQDR.[L]	1xTMT6plex [N-Term]	1	1	6	W5QG24	W5QG24 [255-269]	0	2023.05	15	1.54613e+06	1.3774e+06	1.77672e+06	1.61383e+06	1.86076e+06	1.72224e+06		2	1012.03	4.505e-06	3.13
[K].ETLQALESGQASVDAVTK.[T]	1xTMT6plex [K18]; 1xTMT6plex [N-Term]	1	1	7	W5Q3C2	W5Q3C2 [2153-2170]	0	2305.27	18	4.38536e+06	4.32645e+06	5.09622e+06	7.71438e+06	8.61312e+06	7.76423e+06		3	769.092	1.56e-08	5.73
[K].NKDQGTYEDYVEGLR.[V]	1xDeamidated [N1]; 1xTMT6plex [K2]; 1xTMT6plex [N-Term]	1	2	2	B0FZM4	B0FZM4 [72-86]	1	2246.13	15	1.4027e+06	1.30526e+06	1.55797e+06	1.0982e+06	1.37997e+06	1.10524e+06		3	749.389	7.213e-05	3.06
[K].NKDQGTYEDYVEGLR.[V]	1xTMT6plex [K2]; 1xTMT6plex [N-Term]	1	2	9	B0FZM4	B0FZM4 [72-86]	1	2245.15	15	2.52955e+07	2.41612e+07	2.71271e+07	1.63272e+07	1.99266e+07	1.3182e+07		3	749.05	2.12e-07	4.48
[K].IEEVIGAGEFGEVCR.[G]	1xCarbamidomethyl [C14]; 1xTMT6plex [N-Term]	1	2	2	W5QHB1	W5QHB1 [593-607]	0	1893.96	15	477665	455792	532504	582137	583202	625998		2	947.48	1.877e-06	2.9
[K].NKDPLNDTVVGLYQK.[S]	2xTMT6plex [K2; K15]; 1xTMT6plex [N-Term]	2	2	3	W5PT09; W5PBN5	W5PT09 [598-612]; W5PBN5 [600-614]	1	2391.39	15	9.8391e+06	3731964	5.36632e+06	4.89657e+06	4.99154e+06	4.77296e+06	Shared	3	797.795	1.842e-05	3.97
[K].LEEVMQELQALR.[A]	1xTMT6plex [N-Term]	1	1	1	W5PR73	W5PR73 [465-476]	0	1687.93	12	660350	573458	622518	765898	911006	814255		2	844.46	1.613e-06	3.47
[R].ETLQQMAEVTR.[E]	1xTMT6plex [N-Term]	1	1	8	W5QAL0	W5QAL0 [124-134]	0	1534.81	11	8.48044e+06	7.74746e+06	1.00511e+07	7674454	8.35369e+06	6.89742e+06		2	767.906	2.143e-05	3.62
[K].NKDDQVTVIGAGVTLHEALAAADLLK.[R]	1xDeamidated [Q5]; 2xTMT6plex [K2; K26]; 1xTMT6plex [N-Term]	1	1	3	W5Q5G8	W5Q5G8 [498-523]	1	3350.91	26	594937	614740	683994	829182	851742	795305		3	1117.64	8.936e-12	5.82
[K].NKDDQVTVIGAGVTLHEALAAADLLK.[R]	2xTMT6plex [K2; K26]; 1xTMT6plex [N-Term]	1	1	6	W5Q5G8	W5Q5G8 [498-523]	1	3349.93	26	3.74296e+06	3.39874e+06	4.36037e+06	4.3454e+06	4.84231e+06	4.25114e+06		3	1117.3	9.624e-12	6.78
[R].KFTDFEEVRQEIEVETDR.[V]	1xTMT6plex [K1]; 1xTMT6plex [N-Term]	1	1	1	W5Q6V5	W5Q6V5 [90-107]	2	2728.42	18	548220	492833	677018	612909	714417	722269		4	682.856	1.729e-05	4.51
[R].NKYETEINITK.[T]	2xTMT6plex [K2; K11]; 1xTMT6plex [N-Term]	1	1	3	W5Q7Z7	W5Q7Z7 [1156-1166]	1	2040.19	11	5.26726e+06	4.93606e+06	5.64658e+06	5.75654e+06	6.92475e+06	5.97673e+06		3	680.731	2.087e-06	4.11
[R].KFVADGIFK.[A]	2xTMT6plex [K1; K9]; 1xTMT6plex [N-Term]	1	1	9	W5PPH6	W5PPH6 [48-56]	1	1712.07	9	3.20058e+07	2.99928e+07	3.7765e+07	3.48389e+07	43239387	4.17206e+07		3	571.359	2.334e-05	3.59
[K].ETLEQLSEFNDSLK.[K]	1xTMT6plex [K14]; 1xTMT6plex [N-Term]	1	1	4	W5PA76	W5PA76 [48-61]	0	2111.13	14	1.51964e+06	1.47233e+06	1.69002e+06	1.59789e+06	2.16723e+06	1.59978e+06		2	1056.06	8.226e-07	2.82
[K].ETGVISVLTTGLDR.[E]	1xTMT6plex [N-Term]	1	1	3	W5NZU3	W5NZU3 [322-335]	0	1689.96	14	1.86326e+07	1.81903e+07	2.11959e+07	19890939	2.48944e+07	21670107		2	845.483	2.066e-07	3.36
[K].NIDDGTSDRPYSHALVAGIDR.[Y]	1xTMT6plex [N-Term]	1	1	2	A0A140GI28	A0A140GI28 [28-48]	0	2501.26	21	1.31816e+06	1.13012e+06	1.38128e+06	1.38951e+06	1.42326e+06	1.25958e+06		3	834.417	2.18e-08	5.68
[K].NLDDGIDDER.[L]	1xTMT6plex [N-Term]	1	3	17	W5NPI6	W5NPI6 [236-245]	0	1390.66	10	6.85961e+06	6.16004e+06	7.36128e+06	6.76787e+06	7.62123e+06	6.96522e+06		2	695.836	1.333e-05	2.63
[K].ETGWPFCADEDWGEK.[C]	1xCarbamidomethyl [C7]; 1xTMT6plex [K15]; 1xTMT6plex [N-Term]	1	1	8	W5Q5H8	W5Q5H8 [52-66]	0	2285.06	15	9.85325e+06	7.86169e+06	1.06163e+07	1.2802e+07	1.40059e+07	1.07976e+07		2	1143.03	9.531e-09	4.6
[R].NIDCYNTDFCVR.[V]	2xCarbamidomethyl [C4; C10]; 1xTMT6plex [N-Term]	1	1	3	W5NXT4	W5NXT4 [309-320]	0	1805.81	12	1.41199e+06	1.41516e+06	1.56053e+06	1.56375e+06	1.53715e+06	1525622		2	903.403	2.79e-05	3.51
[K].NLDCPELISEFMK.[K]	1xCarbamidomethyl [C4]; 1xTMT6plex [K13]; 1xTMT6plex [N-Term]	1	1	3	C8BKD4	C8BKD4 [55-67]	0	2054.07	13	2.25513e+06	2.23015e+06	2.51116e+06	2.52569e+06	2.94377e+06	2.59719e+06		3	685.357	1.148e-05	3.48
[R].LEETNSMLTK.[D]	1xTMT6plex [K10]; 1xTMT6plex [N-Term]	1	2	1	W5PGB5	W5PGB5 [941-950]	0	1623.9	10	1890236	1662988	1.8739e+06	1.91857e+06	2.49564e+06	2.11857e+06		2	812.459	9.745e-05	3.15
[K].NICFTVWDVGGQDK.[I]	1xCarbamidomethyl [C3]; 1xTMT6plex [K14]; 1xTMT6plex [N-Term]	2	3	5	C5IWT0; C5IWS9	C5IWT0 [60-73]; C5IWS9 [60-73]	0	2097.08	14	1.67646e+07	1.57423e+07	1.82095e+07	1.786e+07	21356832	1.96762e+07	Shared	2	1049.04	3.774e-07	4.71
[R].ETKDTDIVDEAIYYFK.[A]	2xTMT6plex [K3; K16]; 1xTMT6plex [N-Term]	1	1	1	W5Q5K9	W5Q5K9 [57-72]	1	2637.43	16	819001	678962	888970	858819	895058	973822		3	879.812	9.354e-07	3.75
[R].NLATTVTEEILEK.[S]	1xTMT6plex [K13]; 1xTMT6plex [N-Term]	1	1	3	W5PCK4	W5PCK4 [347-359]	0	1919.11	13	1.39748e+06	1.54799e+06	1.6561e+06	1.58499e+06	1.76424e+06	1.65711e+06		2	960.056	2.333e-06	2.95
[K].ETKPEPMEEDLPENK.[K]	2xTMT6plex [K3; K15]; 1xTMT6plex [N-Term]	1	1	1	W5P359	W5P359 [257-271]	0	2473.31	15	632755	569093	673838	719182	809284	684663		3	825.104	2.152e-05	3.6
[K].NKDDQITLDEFK.[E]	2xTMT6plex [K2; K12]; 1xTMT6plex [N-Term]	1	2	3	W5Q515	W5Q515 [161-172]	1	2153.21	12	8.72073e+06	8.06754e+06	9724236	1.14966e+07	1.42403e+07	1.28534e+07		3	718.403	2.508e-05	3.17
[K].ETKPEPMEEDLPENKK.[Q]	3xTMT6plex [K3; K15; K16]; 1xTMT6plex [N-Term]	1	1	1	W5P359	W5P359 [257-272]	1	2830.57	16	550110	459312	562209	441863	488057	432587		3	944.189	2.447e-07	4.09
[R].ETLAQLQQEFQR.[A]	1xTMT6plex [N-Term]	1	2	3	D0EP88	D0EP88 [106-117]	0	1719.92	12	1.2058e+06	1.12412e+06	1.4643e+06	1.38877e+06	1.59631e+06	1.43927e+06		2	860.463	2.404e-05	3.57
[R].ETIATYQLFVETVDVNGR.[T]	1xDeamidated [N16]; 1xTMT6plex [N-Term]	1	1	2	W5PIJ5	W5PIJ5 [101-118]	0	2285.19	18	1.20594e+06	1.0316e+06	1.17899e+06	1.28867e+06	1.30374e+06	1.10824e+06		3	762.397	7.67e-05	2.4
[K].ETIDAVPNAIPGR.[T]	1xTMT6plex [N-Term]	1	1	9	W5PLU3	W5PLU3 [60-72]	0	1581.88	13	5.05723e+06	4.23524e+06	5.47942e+06	5.12044e+06	5.79491e+06	5.83467e+06		2	791.44	5.701e-05	4.07
[R].NLANTVTEEILEK.[A]	1xDeamidated [N]; 1xTMT6plex [K13]; 1xTMT6plex [N-Term]	1	1	2	W5PUJ4	W5PUJ4 [359-371]	0	1933.09	13	203372	184808	223329	188948	223142	225393		2	967.045	3.153e-05	2.88
[R].NLANTVTEEILEK.[A]	1xTMT6plex [K13]; 1xTMT6plex [N-Term]	1	1	2	W5PUJ4	W5PUJ4 [359-371]	0	1932.11	13	2.12915e+06	2.17309e+06	2.31661e+06	2.04767e+06	2.36642e+06	2.2883e+06		2	966.553	1.373e-07	5.81
[K].NIANPTATLLASCMMLDHLK.[L]	1xCarbamidomethyl [C13]; 1xTMT6plex [K20]; 1xTMT6plex [N-Term]	1	1	1	W5P958	W5P958 [319-338]	0	2672.43	20	851552	812826	936046	958150	1.04143e+06	973854		3	891.477	2.89e-05	3.7
[R].NLAMGVNLTSMSK.[I]	1xTMT6plex [K13]; 1xTMT6plex [N-Term]	1	1	4	W5Q6P4	W5Q6P4 [71-83]	0	1824.01	13	6.53865e+06	5.75794e+06	8.43913e+06	6800336	8027677	8.30798e+06		2	912.506	1.445e-06	4.54
[K].NLAIELAEWNVR.[V]	1xTMT6plex [N-Term]	1	1	1	W5QD93	W5QD93 [196-207]	0	1656.93	12	1293101	1172814	1.58943e+06	1.54089e+06	2.07832e+06	1.94654e+06		2	828.961	7.767e-05	2.97
[R].NLALCPANHAPLR.[E]	1xCarbamidomethyl [C5]; 1xTMT6plex [N-Term]	1	3	4	W5NY24	W5NY24 [517-529]	0	1675.93	13	6.23638e+06	6.56908e+06	8.18165e+06	8.20482e+06	9.84324e+06	9.32611e+06		2	838.468	0.0001188	3.22
[R].NLALCPANHAPLQEAAVIPR.[L]	1xCarbamidomethyl [C5]; 1xDeamidated [N8]; 1xTMT6plex [N-Term]	1	1	1	W5Q7R8	W5Q7R8 [509-528]	0	2385.29	20	1.06332e+06	1.0364e+06	1318173	1.3561e+06	1.50694e+06	1.40071e+06		3	795.774	5.16e-07	4.87
[R].NLALCPANHAPLQEAAVIPR.[L]	1xCarbamidomethyl [C5]; 1xTMT6plex [N-Term]	1	1	10	W5Q7R8	W5Q7R8 [509-528]	0	2384.31	20	7.60866e+06	7.37514e+06	9.09996e+06	9.321e+06	1.11755e+07	1.03212e+07		2	1192.65	3.436e-09	4.77
[R].NLASVGLNLIASGGTAK.[A]	1xTMT6plex [K17]; 1xTMT6plex [N-Term]	1	1	2	W5QDE5	W5QDE5 [23-39]	0	2044.22	17	3.67048e+06	3.52588e+06	4.47388e+06	5.35891e+06	6870809	6171153		2	1022.6	6.994e-08	5.13
[K].ETLSQAETK.[S]	1xTMT6plex [K9]; 1xTMT6plex [N-Term]	1	1	3	W5P9L8	W5P9L8 [1479-1487]	0	1464.83	9	2.7222e+06	2.60773e+06	2.78732e+06	2.53303e+06	2.92886e+06	2.59969e+06		2	732.915	0.0001147	3.18
[R].NHPEPTPEQITEALGGNLCR.[C]	1xCarbamidomethyl [C19]; 1xTMT6plex [N-Term]	1	1	2	W5Q416	W5Q416 [134-153]	0	2462.23	20	653290	587942	757139	683601	824485	722918		3	821.417	5.308e-06	4.51
[K].ETLTYLSFLEEER.[I]	1xTMT6plex [N-Term]	1	1	1	W5PUM8	W5PUM8 [693-705]	0	1858.96	13	726953	691882	836635	788657	880870	767933		2	929.977	8.204e-05	2.51
[R].NGYELSPTAAANFTR.[R]	1xDeamidated [N1]; 1xTMT6plex [N-Term]	1	1	5	W5QE19	W5QE19 [72-86]	0	1841.92	15	7246078	6.39174e+06	7.57569e+06	6.92384e+06	7.30195e+06	6.83829e+06		2	921.459	2.191e-07	4.29
[R].NGYELSPTAAANFTR.[R]	1xTMT6plex [N-Term]	1	1	1	W5QE19	W5QE19 [72-86]	0	1840.94	15	1027636	1.03309e+06	1.28558e+06	1.2521e+06	1.3956e+06	1.29114e+06		2	920.968	5.967e-05	3.43
[R].ETSGNLEQLLLAVVK.[S]	1xTMT6plex [K15]; 1xTMT6plex [N-Term]	2	2	3	W5PZM9; K4P221	W5PZM9 [228-242]; K4P221 [107-121]	0	2072.24	15	1.4698e+07	1.75352e+07	1.39263e+07	1.45607e+07	1.81993e+07	1.51392e+07	Shared	2	1036.61	3.23e-09	5.74
[K].NGWSAQPVCIK.[S]	1xCarbamidomethyl [C9]; 1xDeamidated [N1]; 1xTMT6plex [K11]; 1xTMT6plex [N-Term]	1	1	2	D6PZY4	D6PZY4 [488-498]	0	1718.93	11	5677584	4.6703e+06	6.64732e+06	7583183	8.91913e+06	7290997		2	859.961	7.378e-06	4.25
[R].NGVSEENLAK.[L]	1xDeamidated [N1]; 1xTMT6plex [K10]; 1xTMT6plex [N-Term]	1	1	3	W5NW17	W5NW17 [399-408]	0	1519.84	10	2.1477e+06	1.89862e+06	2.46956e+06	2.37113e+06	2.90428e+06	2.78702e+06		2	760.423	6.587e-05	2.04
[K].NGVQAMVEFDSVQSAQR.[A]	1xDeamidated [N1]; 1xTMT6plex [N-Term]	1	1	8	W5P779	W5P779 [135-151]	0	2096.03	17	1.43232e+06	1.34628e+06	1.7488e+06	1.73075e+06	2.23836e+06	1.95335e+06		3	699.344	9.187e-06	5.02
[K].NGVLDEATIATILK.[E]	1xDeamidated [N1]; 1xTMT6plex [K14]; 1xTMT6plex [N-Term]	1	1	2	W5NSJ5	W5NSJ5 [115-128]	0	1917.13	14	1.04314e+06	976588	1.11327e+06	1.22707e+06	1.32732e+06	1.33993e+06		2	959.066	1.259e-07	4.61
[R].ETTDTDTADQVIASFK.[V]	1xTMT6plex [K16]; 1xTMT6plex [N-Term]	1	1	11	W5P707	W5P707 [804-819]	0	2200.14	16	7.17083e+06	7.13356e+06	8.01405e+06	7.6165e+06	9.58917e+06	7.95723e+06		2	1100.57	2.724e-08	3.51
[K].NGTAGLIPSPELQEWR.[V]	1xDeamidated [N1]; 1xTMT6plex [N-Term]	1	2	2	W5NXK9	W5NXK9 [570-585]	0	1998.05	16	427763	435961	494393	519734	579924	532592		2	999.528	9.346e-07	3.69
[R].ETTEVDLLTK.[E]	1xTMT6plex [K10]; 1xTMT6plex [N-Term]	1	1	4	W5P0F8	W5P0F8 [51-60]	0	1606.93	10	4.4202e+06	4.09241e+06	5.0565e+06	3.81999e+06	4.28425e+06	4.00878e+06		2	803.963	0.0001054	2.2
[R].NGSYDIGMACGVESMSLADR.[G]	1xCarbamidomethyl [C10]; 1xDeamidated [N1]; 1xTMT6plex [N-Term]	1	1	1	W5NS74	W5NS74 [139-158]	0	2363.05	20	247028	181056	325326	232565	247204	228430		3	788.349	3.607e-05	3.85
[R].ETQTEYEWSVDSSK.[L]	1xTMT6plex [K14]; 1xTMT6plex [N-Term]	1	1	16	W5Q7Z7	W5Q7Z7 [1900-1913]	0	2147.05	14	7.00974e+06	6.62643e+06	7.73555e+06	7.99788e+06	8.30135e+06	7.75595e+06		2	1074.03	1.353e-09	4.44
[K].NGSDADIDEGLYSR.[Q]	1xDeamidated [N1]; 1xTMT6plex [N-Term]	1	1	8	W5PVT6	W5PVT6 [44-57]	0	1741.81	14	947100	800250	989308	936224	1.02185e+06	938243		2	871.409	2.66e-06	2.7
[K].KFPVFNPATEEK.[L]	2xTMT6plex [K1; K12]; 1xTMT6plex [N-Term]	1	1	5	P51977	P51977 [37-48]	1	2094.22	12	1.52419e+07	13984599	1.84763e+07	16760794	2.0517e+07	1.90431e+07		3	698.741	1.996e-05	4.45
[K].NGSCGVSYIAQEPGNYEVSIK.[F]	1xCarbamidomethyl [C4]; 1xDeamidated [N1]; 1xTMT6plex [K21]; 1xTMT6plex [N-Term]	1	1	3	W5PT68	W5PT68 [2283-2303]	0	2731.36	21	7.9411e+06	5.30467e+06	8.73923e+06	5.93593e+06	6.24092e+06	5.64651e+06		3	911.123	5.174e-05	3.62
[K].ETTVQTEDLLISESPK.[E]	1xTMT6plex [K16]; 1xTMT6plex [N-Term]	1	1	2	W5P6S8	W5P6S8 [824-839]	0	2248.23	16	323809	244070	319478	332076	390375	335908		3	750.082	9.84e-06	4.18
[K].NGQPESEDKYGTTTSQLDADGSYFLYSR.[L]	3xDeamidated [N1; Q3; Q16]; 1xTMT6plex [K9]; 1xTMT6plex [N-Term]	1	1	1	W5PH95	W5PH95 [329-356]	1	3590.67	28	433001	360291	517958	897052	838292	688994		3	1197.57	3.158e-09	3.39
[K].NGQPESEDKYGTTTSQLDADGSYFLYSR.[L]	2xDeamidated [Q3; Q16]; 1xTMT6plex [K9]; 1xTMT6plex [N-Term]	1	1	2	W5PH95	W5PH95 [329-356]	1	3589.69	28	2.29611e+06	1.79047e+06	2.10425e+06	2.37635e+06	2.20765e+06	1.95849e+06		3	1197.24	8.6e-07	4.48
[K].NGQPESEDKYGTTTSQLDADGSYFLYSR.[L]	1xDeamidated [N1]; 1xTMT6plex [K9]; 1xTMT6plex [N-Term]	1	1	10	W5PH95	W5PH95 [329-356]	1	3588.7	28	5.21335e+06	3.81463e+06	5.92949e+06	7.20754e+06	6.24964e+06	5.62682e+06		3	1196.9	1.22e-10	5.61
[K].NGQPESEDKYGTTTSQLDADGSYFLYSR.[L]	1xTMT6plex [K9]; 1xTMT6plex [N-Term]	1	1	2	W5PH95	W5PH95 [329-356]	1	3587.72	28	2.44937e+06	1.96133e+06	2.37639e+06	3.3771e+06	3099739	2377702		3	1196.57	4.568e-11	5.49
[K].NGQMNCHEGVVK.[V]	1xCarbamidomethyl [C6]; 1xDeamidated [N1]; 1xTMT6plex [K12]; 1xTMT6plex [N-Term]	1	1	5	W5PTS4	W5PTS4 [94-105]	0	1831.92	12	1.50463e+07	1.49408e+07	1.74793e+07	1.68502e+07	1.92034e+07	17531149		3	611.31	1.781e-05	3.76
[K].NGQISADEPK.[T]	1xDeamidated [N1]; 1xTMT6plex [K10]; 1xTMT6plex [N-Term]	1	2	19	W5PD77	W5PD77 [229-238]	0	1517.82	10	5.23394e+06	5.3251e+06	5.48258e+06	4.36463e+06	5.12671e+06	4.91921e+06		2	759.414	0.000104	2.36
[K].NGQDLGIAFK.[I]	1xDeamidated [N1]; 1xTMT6plex [K10]; 1xTMT6plex [N-Term]	1	1	10	W5P4I9	W5P4I9 [338-347]	0	1521.87	10	4.46651e+07	4.6131e+07	5.01786e+07	4.28904e+07	4.97595e+07	4.909e+07		2	761.434	1.597e-05	2.69
[K].ETVNATFPVAIVMLR.[A]	1xTMT6plex [N-Term]	1	1	1	W5QHD5	W5QHD5 [215-229]	0	1890.07	15	1.0709e+06	1.01917e+06	1.31919e+06	1.3672e+06	1.54491e+06	1.46281e+06		2	945.537	4.024e-05	3.28
[K].NGSCGVSYIAQEPGNYEVSIK.[F]	1xCarbamidomethyl [C4]; 3xDeamidated [N1; Q11; N15]; 1xTMT6plex [K21]; 1xTMT6plex [N-Term]	1	1	1	W5PT68	W5PT68 [2283-2303]	0	2733.33	21	735588	652315	823667	982613	979078	898822		3	911.792	4.102e-05	4.03
[K].ETGTQAESPAPAQVPGR.[A]	1xTMT6plex [N-Term]	1	1	1	W5PAC8	W5PAC8 [349-365]	0	1924.99	17	217368	187328	258492	227705	232303	255169		3	642.338	5.024e-05	2.62
[K].NHAVVCQGCHNAIDPEVQR.[V]	2xCarbamidomethyl [C6; C9]; 1xTMT6plex [N-Term]	1	1	3	Q09YJ2	Q09YJ2 [356-374]	0	2433.17	19	2.9843e+06	2.92272e+06	3.06855e+06	3.205e+06	3.65008e+06	3.12376e+06		3	811.728	2.374e-07	3.97
[K].NHDEESLECLCR.[L]	2xCarbamidomethyl [C9; C11]; 1xTMT6plex [N-Term]	2	4	5	W5PFY7; W5QHD6	W5PFY7 [948-959]; W5QHD6 [955-966]	0	1790.8	12	660436	529573	746302	650885	769394	759620	Shared	3	597.604	6.012e-05	2.81
[R].ETLVQDNIQWPTGLAVDYHNER.[L]	1xTMT6plex [N-Term]	1	1	2	W5PBS4	W5PBS4 [4024-4045]	0	2827.42	22	1.85632e+06	1.48287e+06	2.07272e+06	2.05693e+06	2.21802e+06	1.99531e+06		3	943.144	2.451e-06	4.73
[R].ETLVYLTHLDYVDTER.[I]	1xTMT6plex [N-Term]	1	1	1	W5QG19	W5QG19 [460-475]	0	2196.14	16	895780	816058	958941	890578	888364	894815		3	732.713	1.105e-06	4.74
[K].ETMCSSENPILSQCFDR.[S]	2xCarbamidomethyl [C4; C14]; 1xTMT6plex [N-Term]	1	1	8	W5PSC5	W5PSC5 [577-593]	0	2303.03	17	6.3307e+06	5.40348e+06	7.78218e+06	6.4045e+06	7.66588e+06	6.15439e+06		2	1152.01	6.707e-07	3.14
[R].NHMENGGDHR.[Y]	1xDeamidated [N5]; 1xTMT6plex [N-Term]	1	1	9	W5Q530	W5Q530 [426-435]	0	1396.62	10	5.05219e+06	5.16013e+06	4.9398e+06	7.16023e+06	8.57589e+06	7.75435e+06		4	349.908	0.0001057	3.67
[K].ETMQFLNDR.[L]	1xDeamidated [N/Q]; 1xTMT6plex [N-Term]	9	27	33	P25690; E3VW79; W5Q5X4; B0LKP1; P02534; E3VW78; W5Q288; B0LKP2; W5Q505	P25690 [58-66]; E3VW79 [74-82]; W5Q5X4 [96-104]; B0LKP1 [99-107]; P02534 [57-65]; E3VW78 [58-66]; W5Q288 [91-99]; B0LKP2 [106-114]; W5Q505 [106-114]	0	1383.68	9	5.4206e+07	4.5087e+07	5.33486e+07	6.296e+07	6.49951e+07	6.56884e+07	Shared	2	692.342	5.914e-05	2.87
[R].IEEVPELPLVVEDK.[V]	1xTMT6plex [K14]; 1xTMT6plex [N-Term]	1	2	8	W5Q9Z9	W5Q9Z9 [157-170]	0	2067.2	14	1.14295e+07	1.045e+07	1.18605e+07	1.42973e+07	1.57182e+07	1.47133e+07		2	1034.1	7.355e-08	4.59
[K].NHLVEIPPNLPSSLVELR.[I]	1xDeamidated [N9]; 1xTMT6plex [N-Term]	1	2	3	O46390	O46390 [149-166]	0	2257.28	18	3.16139e+06	2.89717e+06	3.76304e+06	3.7511e+06	4.38377e+06	4.12424e+06		2	1129.14	1.697e-05	3.14
[K].NHLVEIPPNLPSSLVELR.[I]	1xTMT6plex [N-Term]	1	2	19	O46390	O46390 [149-166]	0	2256.29	18	2.8534e+07	2.6417e+07	3.56748e+07	3.39552e+07	3.83974e+07	3.65446e+07		3	752.762	3.914e-06	5.4
[R].ETNLDSLPLVDTHSK.[R]	1xTMT6plex [K15]; 1xTMT6plex [N-Term]	2	3	40	K4P1S1; A4ZYA6	K4P1S1 [347-361]; A4ZYA6 [425-439]	0	2127.17	15	1.13667e+08	1.17255e+08	1.20806e+08	1.58994e+08	1.81423e+08	1.60118e+08	Shared	2	1064.08	1.384e-09	4.56
[R].ETNLDSLPLVDTHSK.[R]	1xDeamidated [N3]; 1xTMT6plex [K15]; 1xTMT6plex [N-Term]	2	3	13	K4P1S1; A4ZYA6	K4P1S1 [347-361]; A4ZYA6 [425-439]	0	2128.15	15	1.34867e+07	1.35086e+07	1.4665e+07	1.76272e+07	2.03591e+07	1.83587e+07	Shared	3	710.052	1.687e-07	4.38
[K].NHKEEMQVLQCAAGGNVNVEMNAAPGVDLTVLLNNMR.[A]	1xCarbamidomethyl [C11]; 1xDeamidated [N]; 1xTMT6plex [K3]; 1xTMT6plex [N-Term]	1	2	2	W5Q0H4	W5Q0H4 [220-256]	1	4496.26	37	631618	605028	690202	856838	798455	779920		4	1124.82	1.094e-13	9.39
[R].ETQSQLETER.[C]	1xTMT6plex [N-Term]	1	1	12	W5Q7Z7	W5Q7Z7 [1871-1880]	0	1449.74	10	1.43976e+07	1.40166e+07	1.45822e+07	1.76641e+07	2.12065e+07	1.98222e+07		2	725.372	6.829e-05	3.83
[R].IEEVPELPLVVEDKVEGYK.[K]	2xTMT6plex [K14; K19]; 1xTMT6plex [N-Term]	1	2	7	W5Q9Z9	W5Q9Z9 [157-175]	1	2872.65	19	6.72082e+06	5.50788e+06	7.19115e+06	6.41854e+06	6.38838e+06	6.71237e+06		3	958.216	2.744e-10	5.67
[K].NHEEEMNSLR.[G]	1xDeamidated [N]; 1xTMT6plex [N-Term]	1	1	19	W5Q6L8	W5Q6L8 [217-226]	0	1488.7	10	5.55867e+06	5.04553e+06	6.37398e+06	6.83133e+06	7.60823e+06	7.4129e+06		3	496.903	0.0001271	4.45
[R].ETPLKPIPVEALCDFEGDQGLISR.[G]	1xCarbamidomethyl [C13]; 1xTMT6plex [K5]; 1xTMT6plex [N-Term]	1	1	5	W5P352	W5P352 [374-397]	0	3142.69	24	4.09045e+06	4.12948e+06	4.55863e+06	4.73373e+06	5.17415e+06	4.62649e+06		3	1048.23	2.612e-09	5.48
[K].NHEEEMNSLR.[G]	1xTMT6plex [N-Term]	1	1	31	W5Q6L8	W5Q6L8 [217-226]	0	1487.71	10	2.15626e+07	2.08538e+07	2.34165e+07	2.58949e+07	2.89624e+07	2.60942e+07		2	744.361	1.689e-05	2.48
[R].ETPPDALILESPFTNIR.[E]	1xTMT6plex [N-Term]	1	1	2	W5PCD7	W5PCD7 [202-218]	0	2142.16	17	827898	767444	941558	974179	1.04429e+06	1.00265e+06		2	1071.58	8.398e-07	3.94
[K].NHEEEMKEFSNQLAGQVNVEMDAAPGVDLTR.[V]	1xOxidation [M21]; 1xTMT6plex [K7]; 1xTMT6plex [N-Term]	2	2	1	O77727; W5Q6A4	O77727 [241-271]; W5Q6A4 [246-276]	1	3932.92	31	226596	216677	243256	248855	249703	247886	Shared	4	983.979	8.731e-09	4.3
[R].ETQALILAPTR.[E]	1xTMT6plex [N-Term]	1	1	1	W5NVU4	W5NVU4 [106-116]	0	1441.86	11	1.54089e+06	1.73909e+06	2.24195e+06	2215887	1.64144e+06	1.49074e+06		2	721.43	7.788e-05	3.22
[K].NHEEEMKEFSNQLAGQVNVEMDAAPGVDLTR.[V]	3xDeamidated [Q12; Q16; N18]; 1xTMT6plex [K7]; 1xTMT6plex [N-Term]	2	2	1	O77727; W5Q6A4	O77727 [241-271]; W5Q6A4 [246-276]	1	3919.87	31	864112	825265	890296	886629	873686	839277	Shared	4	980.73	3.233e-08	6.2
[R].ETQDPTAQSLAASLSTR.[Q]	1xTMT6plex [N-Term]	1	1	1	W5PB87	W5PB87 [713-729]	0	2005.04	17	208825	202205	235526	239450	242843	229451		2	1003.02	6.893e-05	1.48
[K].NHEEEMKEFSNQLAGQVNVEMDAAPGVDLTR.[V]	1xTMT6plex [K7]; 1xTMT6plex [N-Term]	2	2	2	O77727; W5Q6A4	O77727 [241-271]; W5Q6A4 [246-276]	1	3916.92	31	1.15268e+06	1.14759e+06	1.24991e+06	1.33869e+06	1.3076e+06	1297555	Shared	4	979.982	1.226e-09	8.17
[R].ETQETLALTQGK.[L]	1xTMT6plex [K12]; 1xTMT6plex [N-Term]	1	1	1	W5QBG8	W5QBG8 [56-67]	0	1777.01	12	1.28059e+06	1.37561e+06	1.62982e+06	1.30134e+06	1.8239e+06	1.51727e+06		2	889.008	4.282e-05	2.01
[K].NHEEEANSLR.[S]	1xTMT6plex [N-Term]	1	2	15	E3VW79	E3VW79 [209-218]	0	1427.71	10	3.29651e+07	3.10593e+07	3.61039e+07	4.53037e+07	4.35242e+07	3.91118e+07		2	714.354	8.051e-05	3.58
[R].IEFDNDADPSSESK.[E]	1xTMT6plex [K14]; 1xTMT6plex [N-Term]	1	1	3	W5NSV3	W5NSV3 [36-49]	0	2011.99	14	496732	471657	472971	579267	685795	544236		2	1006.5	7.013e-05	2.24
[R].FDHILYTGNTAVGK.[I]	1xTMT6plex [K14]; 1xTMT6plex [N-Term]	1	2	6	W5Q9L8	W5Q9L8 [178-191]	0	1994.11	14	2.40557e+07	2.09668e+07	2.73243e+07	3.01395e+07	3.47479e+07	3.11619e+07		2	997.555	4.672e-05	3.46
[R].ELISNSSDALDK.[I]	1xDeamidated [N5]; 1xTMT6plex [K12]; 1xTMT6plex [N-Term]	1	2	8	A8DR93	A8DR93 [47-58]	0	1750.95	12	3.35922e+06	2.65782e+06	3.81429e+06	3.56056e+06	3.84004e+06	3.7528e+06		2	875.977	2.301e-05	3.83
[R].ELISNASDALEK.[L]	1xTMT6plex [K12]; 1xTMT6plex [N-Term]	1	1	2	W5NW44	W5NW44 [94-105]	0	1747.98	12	1.9222e+06	1.74497e+06	2.29843e+06	1.85559e+06	2.14438e+06	2.18519e+06		2	874.496	7.525e-07	4.26
[K].EDPHACYATVFDK.[L]	1xCarbamidomethyl [C6]; 1xTMT6plex [K13]; 1xTMT6plex [N-Term]	1	1	36	P14639	P14639 [387-399]	0	2011	13	2.82209e+08	1.38584e+08	3.28808e+08	7.54983e+07	6.92953e+07	7.04743e+07		2	1006	9.626e-08	4.04
[R].EDPLIIPVPASENPFR.[E]	1xTMT6plex [N-Term]	1	1	3	W5P002	W5P002 [51-66]	0	2023.11	16	3.25106e+06	2.88714e+06	3.77109e+06	3.77488e+06	3.98743e+06	3.64033e+06		2	1012.05	8.271e-05	3.09
[R].SAEQITDSVR.[R]	1xTMT6plex [N-Term]	1	1	3	W5QGS6	W5QGS6 [246-255]	0	1334.71	10	1.97663e+06	1.55759e+06	1.95578e+06	2.03525e+06	2.11672e+06	1.87259e+06		2	667.861	5.199e-05	2.97
[K].EDPNLVPSISNK.[R]	1xTMT6plex [K12]; 1xTMT6plex [N-Term]	1	1	10	W5PW27	W5PW27 [89-100]	0	1771	12	1.8068e+07	1.76544e+07	1.99256e+07	18594166	2.16327e+07	2.00931e+07		2	885.998	1.22e-05	3.26
[K].SAEPSPTVMSSSLGSNLSELDR.[L]	1xDeamidated [N16]; 1xTMT6plex [N-Term]	1	1	3	W5PQI0	W5PQI0 [123-144]	0	2494.22	22	1.28533e+06	1.12473e+06	1.47691e+06	1.4344e+06	1646667	1.58848e+06		3	832.082	7.471e-06	3.62
[K].SAEPSPTVMSSSLGSNLSELDR.[L]	1xTMT6plex [N-Term]	1	1	1	W5PQI0	W5PQI0 [123-144]	0	2493.23	22	325846	287060	341869	351031	377705	378998		3	831.746	1.359e-06	3.69
[K].SAEPAGGAAEGPR.[Q]	1xTMT6plex [N-Term]	1	1	5	W5PDN1	W5PDN1 [393-405]	0	1398.72	13	1.66019e+06	1.34081e+06	1.68493e+06	1.48198e+06	1.63806e+06	1.46603e+06		2	699.865	2.044e-05	2.53
[K].EDQIQVIGNLK.[N]	1xTMT6plex [K11]; 1xTMT6plex [N-Term]	1	1	3	W5QI12	W5QI12 [1298-1308]	0	1715.01	11	2.42217e+06	2.33322e+06	2.84133e+06	2.43538e+06	2.80601e+06	2.48785e+06		2	858.003	7.046e-06	3.64
[R].SAELPDAVGPIVQLQEK.[L]	1xTMT6plex [K17]; 1xTMT6plex [N-Term]	1	2	2	W5P405	W5P405 [34-50]	0	2252.29	17	1.42631e+06	1.43675e+06	1.64884e+06	1.53109e+06	1.72271e+06	1.67004e+06		3	751.431	2.038e-06	4.57
[R].EDQSILCTGESGAGK.[T]	1xCarbamidomethyl [C7]; 1xTMT6plex [K15]; 1xTMT6plex [N-Term]	4	5	12	W5PGT5; W5NU63; W5PWH2; W5QBQ9	W5PGT5 [178-192]; W5NU63 [170-184]; W5PWH2 [146-160]; W5QBQ9 [166-180]	0	2010.02	15	6.25466e+07	7.16035e+07	5.9832e+07	6.19816e+07	7.19198e+07	6.00229e+07	Shared	2	1005.51	5.19e-09	4.9
[K].SAEIDSDDTGGSAAQK.[Q]	1xDeamidated [Q15]; 1xTMT6plex [K16]; 1xTMT6plex [N-Term]	1	1	4	W5PVU0	W5PVU0 [815-830]	0	2010.99	16	1926279	1.52145e+06	2.16713e+06	2.14884e+06	2.43675e+06	2.15209e+06		3	671.006	6.939e-05	3.35
[K].EDQTEYLEER.[R]	1xTMT6plex [N-Term]	2	4	11	A8DR93; W5PHW0	A8DR93 [192-201]; W5PHW0 [187-196]	0	1540.73	10	1.51905e+07	1.42027e+07	1.69068e+07	1.63892e+07	1.87183e+07	1.7812e+07	Shared	2	770.865	4.363e-05	3.89
[K].SAEIDSDDTGGSAAQK.[Q]	1xTMT6plex [K16]; 1xTMT6plex [N-Term]	1	1	7	W5PVU0	W5PVU0 [815-830]	0	2010	16	2.44399e+06	2.10018e+06	2.78719e+06	2.81257e+06	3.23341e+06	2.93274e+06		3	670.672	3.353e-05	4.31
[R].LDQQVEDFRR.[T]	1xTMT6plex [N-Term]	1	1	9	W5NWM2	W5NWM2 [286-295]	1	1534.82	10	7.41284e+06	5.62911e+06	9.01049e+06	5.13236e+06	5.98906e+06	4.98538e+06		3	512.276	3.16e-05	3.91
[K].EDQVLQQNPPK.[F]	1xTMT6plex [K11]; 1xTMT6plex [N-Term]	1	3	4	W5QDF3	W5QDF3 [73-83]	0	1753.98	11	2.34076e+06	2.20344e+06	4.04088e+06	2.42971e+06	2.43236e+06	2.20426e+06		2	877.5	0.0001095	2.5
[K].EDSAVFYELK.[Q]	1xTMT6plex [K10]; 1xTMT6plex [N-Term]	1	1	4	W5QCS1	W5QCS1 [860-869]	0	1658.9	10	1.88245e+06	1.86576e+06	2.06641e+06	1.9595e+06	2.33999e+06	2.14258e+06		2	829.956	3.157e-05	3.75
[R].SAEDETADLPTKPTK.[I]	2xTMT6plex [K12; K15]; 1xTMT6plex [N-Term]	1	2	1	W5QAN9	W5QAN9 [63-77]	0	2290.27	15	587644	587171	707621	656306	706070	651973		3	764.095	1.186e-05	3.26
[R].EDSLAVWDALER.[Y]	1xTMT6plex [N-Term]	1	1	2	W5QBJ9	W5QBJ9 [498-509]	0	1632.84	12	855804	976610	805254	1.17493e+06	1.3686e+06	1.37924e+06		2	816.926	1.21e-06	3.64
[R].EDSLDSVLFLK.[K]	1xTMT6plex [K11]; 1xTMT6plex [N-Term]	1	1	2	W5PUS0	W5PUS0 [283-293]	0	1723.99	11	5.72254e+06	5.32419e+06	6.16661e+06	5.72233e+06	6.73236e+06	6.13466e+06		2	862.493	5.264e-06	2.72
[K].EDSNLSLQEK.[K]	1xTMT6plex [K10]; 1xTMT6plex [N-Term]	1	1	10	W5PU66	W5PU66 [1499-1508]	0	1620.88	10	1.24949e+07	1.28258e+07	1.39844e+07	1.60932e+07	1.83232e+07	1.51807e+07		2	810.948	4.835e-05	2.1
[R].SAEAVLGEALTDFSLR.[L]	1xTMT6plex [N-Term]	1	2	2	W5PJZ2	W5PJZ2 [148-163]	0	1908.03	16	3.69299e+06	2.62377e+06	4.23004e+06	8.33331e+06	9.9042e+06	8.06507e+06		2	954.512	4.403e-09	5.1
[K].EDSSSTEFVEK.[R]	1xTMT6plex [K11]; 1xTMT6plex [N-Term]	1	1	6	W5QCB0	W5QCB0 [189-199]	0	1715.87	11	2.17051e+06	1.42276e+06	2.01223e+06	1.36569e+06	1830694	1.69014e+06		2	858.44	1.388e-06	2.94
[K].SAEAAAEATK.[N]	1xTMT6plex [K10]; 1xTMT6plex [N-Term]	1	1	4	W5PSZ8	W5PSZ8 [526-535]	0	1406.79	10	3.85906e+06	3.42133e+06	4.46835e+06	4.43747e+06	5.32975e+06	4.76091e+06		2	703.896	3.04e-05	3.16
[K].SAFIDDLCGSR.[R]	1xCarbamidomethyl [C8]; 1xTMT6plex [N-Term]	1	1	2	W5QI29	W5QI29 [469-479]	0	1469.73	11	4.05036e+06	4.01717e+06	4.65819e+06	5.54776e+06	6.39806e+06	5952688		2	735.366	5.749e-05	3.1
[K].EDNHPFDLGLYNEAVK.[I]	1xTMT6plex [K16]; 1xTMT6plex [N-Term]	1	1	1	W5P6T4	W5P6T4 [89-104]	0	2319.2	16	839601	753335	931686	967801	1.08084e+06	942734		3	773.737	6.214e-05	3.73
[R].SAFQDSDMLEVR.[V]	1xTMT6plex [N-Term]	1	1	3	W5P0R7	W5P0R7 [70-81]	0	1626.8	12	685390	608787	761538	811763	870534	807602		2	813.9	3.715e-05	2.28
[R].KLPAGAAEDDVAGSAEPGPR.[V]	1xTMT6plex [K1]; 1xTMT6plex [N-Term]	1	1	1	W5PE67	W5PE67 [172-191]	1	2366.27	20	448177	441740	446592	646621	784308	694757		3	789.425	1.492e-10	6.21
[R].SALQSINEWAAQTTDGK.[L]	1xDeamidated [Q/N]; 1xTMT6plex [K17]; 1xTMT6plex [N-Term]	1	2	3	K4P490	K4P490 [168-184]	0	2279.19	17	3.33921e+06	3.18236e+06	3651869	2.93199e+06	3.35123e+06	2.95828e+06		2	1140.1	4.637e-07	4.59
[R].SALQSINEWAAQTTDGK.[L]	1xTMT6plex [K17]; 1xTMT6plex [N-Term]	1	2	9	K4P490	K4P490 [168-184]	0	2278.21	17	2.36064e+07	2.26645e+07	2.67981e+07	20151541	2.38441e+07	2.09576e+07		2	1139.6	3.245e-09	5.6
[R].KLPGDVTEGEVISLGLPFGK.[V]	2xTMT6plex [K1; K20]; 1xTMT6plex [N-Term]	1	2	8	W5PI44	W5PI44 [65-84]	1	2743.62	20	1.87912e+07	1.77789e+07	2.16189e+07	1.93403e+07	2.29042e+07	2.19256e+07		2	1372.3	5.614e-10	5.27
[R].KLPFLNWDAFPK.[L]	2xTMT6plex [K1; K12]; 1xTMT6plex [N-Term]	1	1	2	W5P403	W5P403 [79-90]	1	2163.29	12	7934448	6.50751e+06	7.72771e+06	9894136	9483125	9534817		3	721.762	8.172e-05	3.82
[K].EDLPAENGETK.[N]	1xDeamidated [N7]; 1xTMT6plex [K11]; 1xTMT6plex [N-Term]	1	4	3	W5QET4	W5QET4 [73-83]	0	1661.86	11	415894	482895	445073	581696	581404	475448		2	831.432	6.292e-05	2.62
[K].EDLPGFVFESNR.[G]	1xTMT6plex [N-Term]	1	1	1	W5P7R2	W5P7R2 [783-794]	0	1638.83	12	576800	524736	608977	647539	740901	700340		2	819.916	6.558e-05	3.01
[K].EDLQELNDR.[L]	1xTMT6plex [N-Term]	1	1	13	W5P640	W5P640 [33-41]	0	1360.69	9	1.05109e+07	1.18058e+07	9.9128e+06	1.2851e+07	1.38617e+07	1.18304e+07		2	680.849	3.431e-05	2.55
[K].SALFSSLLSSLPQDK.[I]	1xTMT6plex [K15]; 1xTMT6plex [N-Term]	1	1	4	W5PNC9	W5PNC9 [735-749]	0	2051.18	15	2.25417e+06	2189415	2.67984e+06	3.02582e+06	3.12213e+06	2.97513e+06		2	1026.09	7.528e-07	3.41
[K].EDIQSVMTEVR.[R]	1xTMT6plex [N-Term]	1	1	2	W5PAH6	W5PAH6 [473-483]	0	1535.79	11	396105	318716	457350	420600	457736	455724		2	768.403	2.266e-05	2.79
[R].EDLRLPEGDLGK.[E]	1xTMT6plex [K12]; 1xTMT6plex [N-Term]	1	2	15	W5PQK7	W5PQK7 [113-124]	1	1800.03	12	4.7361e+07	4.26334e+07	5.71331e+07	4.24338e+07	5.43244e+07	4.62046e+07		3	600.676	1.309e-05	3.08
[K].SALENMLSETQSR.[Y]	1xTMT6plex [N-Term]	1	1	7	W5Q1S9	W5Q1S9 [309-321]	0	1694.86	13	3.69344e+06	3.86912e+06	4.55856e+06	4.1439e+06	4.53171e+06	4.32363e+06		2	847.929	2.63e-06	2.97
[K].SADVNVFAIGVEDADEGALK.[E]	1xTMT6plex [K20]; 1xTMT6plex [N-Term]	1	1	2	W5QCP9	W5QCP9 [168-187]	0	2478.31	20	557561	653173	540736	576331	632285	526154		2	1239.65	1.439e-07	4.03
[R].EDLSPSVTQLAAECVQR.[G]	1xCarbamidomethyl [C14]; 1xTMT6plex [N-Term]	1	1	9	W5P094	W5P094 [124-140]	0	2132.09	17	1.66747e+06	1.69182e+06	1.76324e+06	1.6277e+06	1.67377e+06	1.57776e+06		2	1066.54	1.537e-07	4.85
[R].SAGWNIPMGR.[L]	1xTMT6plex [N-Term]	1	1	17	W5PF65	W5PF65 [143-152]	0	1317.69	10	1.441e+08	9.46303e+07	1.50458e+08	1.00006e+08	1.12805e+08	9.5867e+07		2	659.346	0.0001163	3.24
[K].KIPDPDSDDVSEVDAR.[H]	1xTMT6plex [K1]; 1xTMT6plex [N-Term]	1	1	3	W5Q7P6	W5Q7P6 [678-693]	1	2216.14	16	3.19043e+06	2.74055e+06	3.33318e+06	3.32235e+06	3.68787e+06	3.4165e+06		3	739.385	1.919e-05	4.12
[K].SAGIASLGVGDR.[N]	1xTMT6plex [N-Term]	1	1	11	W5QCP9	W5QCP9 [1544-1555]	0	1331.75	12	6.73054e+07	5.73457e+07	6.94065e+07	5.47327e+07	6.38685e+07	5.50547e+07		2	666.375	6.025e-06	3.29
[K].EDIYAVEIVGGATR.[I]	1xTMT6plex [N-Term]	1	1	5	W5PVL5	W5PVL5 [334-347]	0	1721.93	14	1.79263e+06	1.56087e+06	1.97626e+06	1.85654e+06	1.99738e+06	1.75526e+06		2	861.467	5.851e-07	3.61
[K].EDLYLKPIQR.[T]	1xTMT6plex [K6]; 1xTMT6plex [N-Term]	1	2	6	W5PN84	W5PN84 [556-565]	0	1733.04	10	1.40701e+07	1.16024e+07	1.59236e+07	1.47088e+07	1.69154e+07	1.47787e+07		3	578.347	7.243e-05	2.11
[R].SAGLAFSLYQAMAK.[D]	1xTMT6plex [K14]; 1xTMT6plex [N-Term]	1	2	7	K4P490	K4P490 [47-60]	0	1916.07	14	1.34121e+07	1.05469e+07	1.5214e+07	9.77881e+06	1.05268e+07	9.80971e+06		2	958.533	2.139e-08	4.88
[K].EDMAGIPEAK.[Q]	1xTMT6plex [K10]; 1xTMT6plex [N-Term]	1	1	8	W5QEE8	W5QEE8 [448-457]	0	1518.82	10	1.08631e+07	1.13739e+07	1.12671e+07	8.02923e+06	9.00851e+06	7.84856e+06		2	759.913	2.654e-05	3.45
[K].SAGDLDALAFDGR.[T]	1xTMT6plex [N-Term]	1	1	2	W5PAT6	W5PAT6 [1858-1870]	0	1536.79	13	629026	526472	655794	681248	801204	711877		2	768.9	1.715e-07	4.09
[R].EDMESVLDK.[M]	1xTMT6plex [K9]; 1xTMT6plex [N-Term]	1	1	5	W5PS58	W5PS58 [339-347]	0	1523.8	9	3.15817e+06	2.98034e+06	3.17189e+06	2.55651e+06	2.99458e+06	2.7991e+06		2	762.407	8.974e-05	2.68
[K].SAGDGEDSKTETQPPEAK.[A]	1xDeamidated [Q13]; 2xTMT6plex [K9; K18]; 1xTMT6plex [N-Term]	1	2	1	W5NYH4	W5NYH4 [539-556]	1	2535.3	18	435300	380633	459982	448442	547875	437239		3	845.774	3.736e-06	2.92
[R].SAGACTAAAFLK.[E]	1xCarbamidomethyl [C5]; 1xTMT6plex [K12]; 1xTMT6plex [N-Term]	1	1	5	W5NZQ2	W5NZQ2 [461-472]	0	1625.91	12	7.59198e+06	6.98977e+06	8.74561e+06	9.38711e+06	1.13795e+07	1.06775e+07		2	813.455	1.546e-05	4.34
[R].SAKPVGPEDMGATAVYELDTEKER.[D]	2xTMT6plex [K3; K22]; 1xTMT6plex [N-Term]	1	2	1	W5PJ52	W5PJ52 [105-128]	1	3280.73	24	758905	750220	969772	934565	1.05623e+06	914062		4	820.939	2.745e-05	4.86
[R].SALQSINEWAAQTTDGKLPEVTK.[D]	2xTMT6plex [K17; K23]; 1xTMT6plex [N-Term]	1	2	5	K4P490	K4P490 [168-190]	1	3174.76	23	1.75298e+07	1.59122e+07	2.02796e+07	1.34227e+07	1.56366e+07	1.37796e+07		3	1058.92	5.041e-08	3.89
[K].EDTEEYNLR.[D]	1xTMT6plex [N-Term]	1	2	8	W5Q7M7	W5Q7M7 [135-143]	0	1397.67	9	1.41471e+06	1.46914e+06	1.44926e+06	1.48741e+06	1.64595e+06	1.48722e+06		2	699.341	0.0001003	2.85
[R].SADLTGLEQR.[V]	1xTMT6plex [N-Term]	1	1	11	W5PUF6	W5PUF6 [1137-1146]	0	1318.72	10	2.16853e+07	1.93652e+07	2.33465e+07	2.18613e+07	2.51377e+07	2.2438e+07		2	659.859	8.589e-05	3.33
[R].EEAESTLQSFR.[Q]	1xTMT6plex [N-Term]	2	3	22	K4P1S1; A4ZYA6	K4P1S1 [119-129]; A4ZYA6 [197-207]	0	1525.77	11	1.5393e+07	1.82031e+07	1.70459e+07	1.94344e+07	2.23111e+07	2.13107e+07	Shared	2	763.389	3.297e-06	3.46
[K].EEAGAPGGAAYTK.[R]	1xTMT6plex [K13]; 1xTMT6plex [N-Term]	1	1	4	W5QEH9	W5QEH9 [335-347]	0	1679.9	13	7.10499e+06	6.87989e+06	7.08856e+06	5.7987e+06	6.31281e+06	5.46996e+06		2	840.455	9.19e-07	3.33
[R].EEAGFTLGASDTTASLK.[G]	1xTMT6plex [K17]; 1xTMT6plex [N-Term]	1	1	2	W5PJT9	W5PJT9 [400-416]	0	2156.15	17	918680	1.02801e+06	1.01275e+06	733214	875662	801783		2	1078.57	9.179e-08	3.78
[K].SAAEVIAQAR.[K]	1xTMT6plex [N-Term]	1	2	5	W5PJ56	W5PJ56 [259-268]	0	1244.72	10	1.87291e+07	1.67717e+07	2.00429e+07	1.60645e+07	1.94739e+07	1.83542e+07		2	622.859	4.606e-05	3.67
[R].SAADSISESIPVGPK.[V]	1xTMT6plex [K15]; 1xTMT6plex [N-Term]	1	1	4	W5P689	W5P689 [779-793]	0	1916.07	15	6.43591e+06	5.54049e+06	7.23621e+06	6.68234e+06	7.77957e+06	7.00528e+06		2	958.54	9.863e-07	3.69
[K].EEAPDILCLQETK.[C]	1xCarbamidomethyl [C8]; 1xTMT6plex [K13]; 1xTMT6plex [N-Term]	2	3	7	W5NUX2; W5QEQ3	W5NUX2 [86-98]; W5QEQ3 [86-98]	0	2004.07	13	4.12649e+06	4.23057e+06	4.65062e+06	4.2132e+06	4.49157e+06	4.13063e+06	Shared	2	1002.54	6.39e-07	3.55
[K].EEAQAEIEQYR.[L]	1xTMT6plex [N-Term]	1	1	3	W5P7L2	W5P7L2 [38-48]	0	1594.79	11	154084	136659	168957	162443	169694	162718		2	797.897	5.342e-05	3.02
[K].EEASDYLELDTIK.[N]	1xTMT6plex [K13]; 1xTMT6plex [N-Term]	1	1	4	W5Q4E1	W5Q4E1 [253-265]	0	1984.05	13	4.41054e+06	3.74469e+06	4.62835e+06	4.43031e+06	4.68411e+06	4.09004e+06		2	992.529	2.116e-07	4.55
[R].IDQYQGADAVGLEEK.[I]	1xTMT6plex [K15]; 1xTMT6plex [N-Term]	1	1	9	W5P4S2	W5P4S2 [85-99]	0	2094.11	15	5.46655e+06	4.49185e+06	6.15094e+06	5.4567e+06	6.08447e+06	5.97803e+06		2	1047.56	4.53e-09	4.57
[K].KLNNLSFLYLDHNALESVPLNLPESLR.[V]	1xDeamidated [N13]; 1xTMT6plex [K1]; 1xTMT6plex [N-Term]	1	1	2	W5PEL2	W5PEL2 [212-238]	1	3568.98	27	1.62351e+06	1.52213e+06	1.6108e+06	1.74192e+06	1.5655e+06	1.56518e+06		4	892.999	4.05e-09	6.47
[K].KLNNLSFLYLDHNALESVPLNLPESLR.[V]	1xTMT6plex [K1]; 1xTMT6plex [N-Term]	1	1	1	W5PEL2	W5PEL2 [212-238]	1	3567.99	27	664165	614938	656961	750797	717516	710475		4	892.752	4.359e-09	6.54
[R].RWEYENELAK.[V]	1xTMT6plex [K10]; 1xTMT6plex [N-Term]	1	1	1	W5Q7Z7	W5Q7Z7 [1289-1298]	1	1795.97	10	682262	638222	729700	871569	884357	855641		3	599.326	0.0001215	4.35
[R].RWEVAALQSQLR.[I]	1xTMT6plex [N-Term]	1	1	3	W5Q0F9	W5Q0F9 [148-159]	1	1685.96	12	2.30954e+06	2249983	2.86219e+06	2.70517e+06	3.32442e+06	3.29053e+06		3	562.658	8.623e-05	3.77
[K].EEDASLSSPAVVMPTMGR.[-]	1xTMT6plex [N-Term]	1	1	2	W5NS43	W5NS43 [519-536]	0	2106.04	18	323375	314997	491484	379058	411425	380315		2	1053.52	1.156e-06	2.51
[R].RVSEAELASR.[E]	1xTMT6plex [N-Term]	1	1	3	W5NU17	W5NU17 [85-94]	1	1346.76	10	966565	690600	855211	1.03415e+06	1.02701e+06	990219		3	449.591	0.0001265	4.25
[K].EEDKEPIIELFVK.[A]	2xTMT6plex [K4; K13]; 1xTMT6plex [N-Term]	1	1	2	W5P8X9	W5P8X9 [12-24]	1	2276.34	13	2.04931e+06	2.08806e+06	2.22073e+06	2.86693e+06	3.03163e+06	2797339		3	759.444	4.279e-05	3.69
[K].RVIISAPSADAPMFVMGVNHEK.[Y]	1xTMT6plex [K22]; 1xTMT6plex [N-Term]	1	3	4	D7R7V6	D7R7V6 [116-137]	1	2827.54	22	3.35753e+06	3.11442e+06	4.03603e+06	4.22487e+06	4.93547e+06	4.59714e+06		4	707.634	6.423e-08	4.47
[R].RVLDEITLCR.[T]	1xCarbamidomethyl [C9]; 1xTMT6plex [N-Term]	1	1	1	W5Q0H4	W5Q0H4 [191-200]	1	1503.85	10	214404	202633	276791	263118	267283	287882		3	501.953	7.611e-05	4.98
[R].EEEAGPALALSLIER.[Y]	1xTMT6plex [N-Term]	1	1	4	W5NRL0	W5NRL0 [268-282]	0	1827.01	15	322646	237193	352421	510626	596070	514128		2	914.008	5.672e-06	3.87
[R].RVLDELTLAR.[TA]	1xTMT6plex [N-Term]	4	6	6	W5Q702; U3MXA9; W5Q6L8; W5Q1E7	W5Q702 [165-174]; U3MXA9 [200-209]; W5Q6L8 [188-197]; W5Q1E7 [247-256]	1	1414.86	10	5.5349e+06	4.84715e+06	6.30655e+06	6.37879e+06	7.0006e+06	6.88561e+06	Shared	3	472.288	3.518e-05	4.88
[R].RVEENVQQQK.[T]	1xTMT6plex [K10]; 1xTMT6plex [N-Term]	1	1	12	W5Q7Z7	W5Q7Z7 [1373-1382]	1	1715.98	10	3.06006e+07	32164416	3.50394e+07	4.44987e+07	5.72056e+07	5.08922e+07		3	572.664	1.381e-06	4.72
[R].RVDSAEWGVDLPSVEAQLGSHR.[G]	1xTMT6plex [N-Term]	1	1	4	W5Q2U7	W5Q2U7 [666-687]	1	2637.36	22	4.33797e+06	3.80577e+06	5.18505e+06	4.14388e+06	4.5435e+06	4.24254e+06		4	660.093	9.47e-05	4.2
[R].EEEEFNTGPLSVLTQSVK.[N]	1xTMT6plex [K18]; 1xTMT6plex [N-Term]	1	1	2	W5PKG8	W5PKG8 [20-37]	0	2465.32	18	1390619	1.24979e+06	1.81864e+06	2.22937e+06	2.10204e+06	2.52221e+06		3	822.439	1.128e-05	4.45
[K].SAAGEFADDPCSSVK.[R]	1xCarbamidomethyl [C11]; 1xTMT6plex [K15]; 1xTMT6plex [N-Term]	1	1	14	W5Q5C7	W5Q5C7 [106-120]	0	1998.98	15	1.71404e+07	2.01215e+07	2.02241e+07	2.06724e+07	2.40765e+07	1.98606e+07		2	999.997	1.105e-06	3.47
[R].SAALQSTQSQEEFKLEDLK.[K]	1xDeamidated [Q10]; 2xTMT6plex [K14; K19]; 1xTMT6plex [N-Term]	1	1	1	W5PWQ7	W5PWQ7 [74-92]	1	2840.55	19	576338	541305	705928	672542	774834	685896		3	947.526	0.0001067	2.53
[K].EEAENNLAAFR.[A]	1xTMT6plex [N-Term]	1	1	8	W5QG29	W5QG29 [202-212]	0	1492.76	11	5.24224e+06	6.68716e+06	4.91127e+06	2.86787e+06	3.1654e+06	2.76978e+06		2	746.883	3.728e-06	2.57
[K].SAAQAAAQTNSNAAGK.[Q]	1xDeamidated [Q/N]; 1xTMT6plex [K16]; 1xTMT6plex [N-Term]	1	1	6	W5PNR4	W5PNR4 [53-68]	0	1920.02	16	7.7393e+06	8.13488e+06	9.65904e+06	8.9826e+06	1.12636e+07	9.28127e+06		2	960.509	1.271e-07	4.87
[R].EDTSVLLQQTK.[R]	1xTMT6plex [K11]; 1xTMT6plex [N-Term]	1	1	1	W5P8U8	W5P8U8 [551-561]	0	1719.99	11	387622	439121	464536	528772	590899	535526		2	860.492	5.883e-05	2.94
[K].SADGVIVSGVK.[D]	1xTMT6plex [K11]; 1xTMT6plex [N-Term]	1	1	2	W5P9Y1	W5P9Y1 [176-186]	0	1489.9	11	5.16757e+06	4.3129e+06	5.28263e+06	5.07973e+06	5.98594e+06	5.57931e+06		2	745.45	1.282e-05	3.97
[K].EDVFLSVPCILGQNGISDVVK.[V]	1xCarbamidomethyl [C9]; 1xDeamidated [N14]; 1xTMT6plex [K21]; 1xTMT6plex [N-Term]	1	2	1	W5PIN6	W5PIN6 [285-305]	0	2748.49	21	1.92752e+06	1.76073e+06	2.65649e+06	1948745	2161946	2093841		2	1374.74	9.983e-08	5.15
[R].SADFVVESIGSEVGSLGFAIEGPSQAK.[I]	1xTMT6plex [K27]; 1xTMT6plex [N-Term]	1	1	4	W5PT68	W5PT68 [567-593]	0	3139.66	27	254381	233859	290591	390822	409006	387154		3	1047.22	4.448e-10	6.84
[K].SADFVVEAIGTEVGTLGFSIEGPSQAK.[I]	1xTMT6plex [K27]; 1xTMT6plex [N-Term]	1	1	2	W5NZK9	W5NZK9 [552-578]	0	3167.69	27	131595	118347	128654	86132	76209.3	85404.8		3	1056.57	1.394e-07	3.04
[K].SADFVVEAIGDDVGTLGFSVEGPSQAK.[I]	1xTMT6plex [K27]; 1xTMT6plex [N-Term]	1	1	3	W5P5A0	W5P5A0 [593-619]	0	3153.64	27	91280.2	89269.9	86570.2	77166	98627.1	104008		4	789.161	5.337e-07	3.66
[R].EDVLTLLLPVMGDSK.[S]	1xTMT6plex [K15]; 1xTMT6plex [N-Term]	1	1	1	W5QHD8	W5QHD8 [566-580]	0	2088.2	15	1.77147e+06	1.64229e+06	1.8819e+06	2.08337e+06	2.42527e+06	2305916		2	1044.6	1.485e-05	4.04
[K].EDVIWELLNHAQEHFGK.[D]	1xTMT6plex [K17]; 1xTMT6plex [N-Term]	1	1	4	W5PF65	W5PF65 [283-299]	0	2523.34	17	3.82063e+06	2.88231e+06	3.7105e+06	3.92844e+06	3.93247e+06	3.54551e+06		4	631.585	3.978e-08	5.41
[K].EDVIWELLNHAQEHFGK.[D]	1xDeamidated [N9]; 1xTMT6plex [K17]; 1xTMT6plex [N-Term]	1	1	4	W5PF65	W5PF65 [283-299]	0	2524.32	17	3.53476e+06	2.53134e+06	3584219	3.86694e+06	3.95451e+06	3.37492e+06		4	631.832	1.514e-06	4.63
[K].SADFPNFNPSSLLPK.[A]	1xTMT6plex [K15]; 1xTMT6plex [N-Term]	1	1	5	W5PTU7	W5PTU7 [175-189]	0	2092.15	15	9.03969e+06	7.54992e+06	1.01062e+07	1.03097e+07	1.22354e+07	1.19872e+07		2	1046.57	1.008e-05	2.66
[K].SADESGQALLAAGHYASDEVR.[E]	1xDeamidated [Q7]; 1xTMT6plex [N-Term]	1	1	1	W5PJ75	W5PJ75 [419-439]	0	2377.15	21	801004	604207	763048	724998	780514	693224		3	793.059	5.776e-06	3.33
[K].SADTLWGIQK.[ED]	1xTMT6plex [K10]; 1xTMT6plex [N-Term]	3	4	9	W5PIN6; Q7YS10; W5QGD1	W5PIN6 [319-328]; Q7YS10 [26-35]; W5QGD1 [323-332]	0	1576.91	10	1.14143e+07	1.01803e+07	1.3289e+07	1.20739e+07	1.47947e+07	1.32529e+07	Shared	2	788.952	2.417e-05	3.44
[K].SADESGQALLAAGHYASDEVR.[E]	1xTMT6plex [N-Term]	1	1	3	W5PJ75	W5PJ75 [419-439]	0	2376.16	21	3.78428e+06	3.86786e+06	4.81941e+06	4.75819e+06	5.3176e+06	4.66515e+06		3	792.72	2.791e-07	4.91
[R].SADEPMTTFVVCNECGNR.[W]	2xCarbamidomethyl [C12; C15]; 1xTMT6plex [N-Term]	1	1	5	W5PWT8	W5PWT8 [259-276]	0	2316.03	18	2.21015e+06	1.50923e+06	2.30042e+06	2.01872e+06	2.37365e+06	2.38584e+06		3	772.68	5.981e-06	3.75
[R].IDQVNQLLELDHQK.[R]	1xTMT6plex [K14]; 1xTMT6plex [N-Term]	1	1	2	W5QIM2	W5QIM2 [402-415]	0	2151.22	14	2.41821e+06	2.27376e+06	2.94427e+06	2.86979e+06	3.40761e+06	3.11866e+06		3	717.741	3.775e-06	4.95
[R].EDYIEFASLDGSNR.[H]	1xTMT6plex [N-Term]	1	1	4	W5PBS4	W5PBS4 [3159-3172]	0	1844.89	14	548904	426755	493335	472972	516013	415908		2	922.952	5.847e-06	3.13
[R].SADDSLSGVVR.[C]	1xTMT6plex [N-Term]	1	1	3	W5NQB9	W5NQB9 [711-721]	0	1334.71	11	6.35183e+06	6.80898e+06	6.94161e+06	6.33943e+06	7.88996e+06	6.91035e+06		2	667.858	5.206e-05	1.48
[K].EEAAAGGGSTGETAGK.[T]	1xTMT6plex [K16]; 1xTMT6plex [N-Term]	1	1	8	W5PSI1	W5PSI1 [39-54]	0	1850.95	16	2.58496e+06	2.36806e+06	2.61423e+06	2.61971e+06	2.86566e+06	2.4929e+06		2	925.977	2.866e-06	2.65
[R].EEAAALQALQLDR.[Q]	1xTMT6plex [N-Term]	1	1	3	W5Q9L9	W5Q9L9 [760-772]	0	1656.91	13	885233	1.03402e+06	1.18391e+06	1.27106e+06	1.50888e+06	1.29223e+06		2	828.959	1.095e-06	3.45
[R].EEAADLSSLKPR.[L]	1xTMT6plex [K10]; 1xTMT6plex [N-Term]	1	1	1	W5PKQ2	W5PKQ2 [90-101]	0	1774.01	12	661120	646322	727958	945871	1107421	1.01231e+06		3	592.004	1.12e-05	2.84
[R].EEAAEVASLDINNIISNSDRPR.[R]	1xTMT6plex [N-Term]	1	2	1	W5P3B3	W5P3B3 [514-535]	0	2642.36	22	73700.4	74622.4	86189	97914.4	79387.4	75689.8		3	881.462	7.306e-06	2.2
[R].SACDTVDTWLDDTAK.[G]	1xCarbamidomethyl [C3]; 1xTMT6plex [K15]; 1xTMT6plex [N-Term]	1	1	8	W5NYP8	W5NYP8 [4196-4210]	0	2156.06	15	1.0018e+07	9.22159e+06	1.11639e+07	1.13334e+07	1.34427e+07	1.23373e+07		2	1078.53	1.323e-05	3
[R].EEACDCLFEIVNK.[G]	2xCarbamidomethyl [C4; C6]; 1xTMT6plex [K13]; 1xTMT6plex [N-Term]	1	2	2	W5P005	W5P005 [241-253]	0	2085.04	13	674523	577808	763155	800319	881585	746574		3	695.681	8.384e-05	3.28
[K].SAAQAAAQTNSNAAGK.[Q]	2xDeamidated [Q4; N12]; 1xTMT6plex [K16]; 1xTMT6plex [N-Term]	1	1	1	W5PNR4	W5PNR4 [53-68]	0	1921	16	319633	344369	402600	342091	384499	351665		2	961.01	4.74e-05	3.6
[R].EDVVTNGIGR.[V]	1xDeamidated [N6]; 1xTMT6plex [N-Term]	1	1	13	W5PBS4	W5PBS4 [1926-1935]	0	1289.69	10	3.93724e+06	3.07914e+06	3.68659e+06	3.01701e+06	3.76382e+06	3.15559e+06		2	645.35	0.0001235	2.26
[K].SALTVQFVQGIFVEK.[Y]	1xTMT6plex [K15]; 1xTMT6plex [N-Term]	2	2	4	W5NSD5; W5QED8	W5NSD5 [17-31]; W5QED8 [17-31]	0	2124.25	15	1.37113e+06	1.26956e+06	1.51256e+06	1.68614e+06	1.57983e+06	1.65153e+06	Shared	2	1062.62	6.104e-06	3.57
[K].SAIVHLINYQDDAELATR.[A]	1xTMT6plex [N-Term]	1	1	3	W5Q7R8	W5Q7R8 [127-144]	0	2258.2	18	4491274	4.32856e+06	5635229	4.93974e+06	5682271	5415579		3	753.4	9.752e-06	4.69
[R].EDLECLIQEQMK.[K]	1xCarbamidomethyl [C5]; 1xTMT6plex [K12]; 1xTMT6plex [N-Term]	1	1	3	W5PHR3	W5PHR3 [69-80]	0	1994.03	12	522033	548468	523212	567959	691632	629856		2	997.521	6.799e-06	3.57
[K].SCLVCQASFCELHLKPHLEGAAFR.[D]	3xCarbamidomethyl [C2; C5; C10]; 1xTMT6plex [K15]; 1xTMT6plex [N-Term]	1	1	3	W5Q530	W5Q530 [172-195]	0	3288.68	24	3.78131e+06	3.16121e+06	3.51283e+06	3.84479e+06	4.75529e+06	4273634		5	658.537	0.0001069	4.29
[K].IDQLEGDHQLIQEALIFDNK.[H]	1xTMT6plex [K20]; 1xTMT6plex [N-Term]	1	1	6	W5QJ62	W5QJ62 [657-676]	0	2797.51	20	9.99484e+06	1.05186e+07	1.06501e+07	1.08266e+07	1.24041e+07	1.10341e+07		2	1399.25	1.473e-10	3.99
[K].ECVAGASGSEEVKDLEHK.[L]	1xCarbamidomethyl [C2]; 2xTMT6plex [K13; K18]; 1xTMT6plex [N-Term]	1	2	2	W5QIX0	W5QIX0 [1104-1121]	1	2632.39	18	914858	898417	999550	1.193e+06	1.3842e+06	1.1579e+06		4	658.851	3.986e-08	5.26
[K].SCLLLQFTDK.[R]	1xCarbamidomethyl [C2]; 1xTMT6plex [K10]; 1xTMT6plex [N-Term]	2	3	5	W5Q3E6; W5QED1	W5Q3E6 [23-32]; W5QED1 [25-34]	0	1682.96	10	1.06656e+07	9.47179e+06	1.205e+07	1.12213e+07	1.26337e+07	1.15107e+07	Shared	2	841.974	4.989e-05	3.39
[R].SCFESLEADK.[T]	1xCarbamidomethyl [C2]; 1xTMT6plex [K10]; 1xTMT6plex [N-Term]	1	2	1	W5PXI3	W5PXI3 [508-517]	0	1643.84	10	1.20124e+06	979089	1.32316e+06	1.27154e+06	1.42554e+06	1.32481e+06		2	822.423	8.975e-05	1.82
[K].SCESNSPFPVHPGTPECCTHEGLEK.[K]	3xCarbamidomethyl [C2; C17; C18]; 1xTMT6plex [K25]; 1xTMT6plex [N-Term]	1	2	1	W5PTG9	W5PTG9 [95-119]	0	3314.53	25	366592	272022	357400	391682	357316	269839		4	829.384	4.817e-08	4.4
[R].SCDCDPMGSQDGGR.[C]	2xCarbamidomethyl [C2; C4]; 1xTMT6plex [N-Term]	1	1	2	W5PYU4	W5PYU4 [413-426]	0	1770.7	14	331371	340783	303179	296984	325734	329843		2	885.86	4.451e-05	3.65
[R].ECYCPPDFPSALYCDSR.[N]	3xCarbamidomethyl [C2; C4; C14]; 1xTMT6plex [N-Term]	1	1	14	W5NUA0	W5NUA0 [75-91]	0	2366.01	17	1.64651e+07	1.52873e+07	1.79476e+07	2.18567e+07	2.51111e+07	2.25928e+07		2	1183.51	1.932e-07	4.69
[K].SCCTSVNEVICHGIPDR.[R]	3xCarbamidomethyl [C2; C3; C11]; 1xTMT6plex [N-Term]	1	1	1	W5Q2N7	W5Q2N7 [154-170]	0	2233.04	17	385268	366088	449611	456839	414402	424727		3	745.013	1.776e-06	3.79
[R].LDQLIYIPLPDEK.[S]	1xTMT6plex [K13]; 1xTMT6plex [N-Term]	1	1	5	W5PRJ4	W5PRJ4 [639-651]	0	2015.18	13	3.16586e+06	3.10812e+06	3.90291e+06	3.76325e+06	4.12658e+06	3.59729e+06		2	1008.09	2.305e-05	3.93
[K].SCAFAPADVTSEKDVQAALTLAR.[E]	1xCarbamidomethyl [C2]; 1xDeamidated [Q16]; 1xTMT6plex [K13]; 1xTMT6plex [N-Term]	1	1	3	W5PF12	W5PF12 [57-79]	1	2880.52	23	3.74646e+06	3.4832e+06	4.22715e+06	3.05017e+06	3.45142e+06	3.17521e+06		3	960.846	5.727e-09	4.27
[R].EDAEAWFNEK.[S]	1xTMT6plex [K10]; 1xTMT6plex [N-Term]	1	1	7	W5Q0K6	W5Q0K6 [272-281]	0	1696.86	10	4.6971e+06	6.86439e+06	8.06837e+06	5.74308e+06	6.50636e+06	5.46581e+06		2	848.928	2.455e-05	3.42
[K].EDAIAFAEK.[N]	1xTMT6plex [K9]; 1xTMT6plex [N-Term]	1	1	7	W5PE07	W5PE07 [127-135]	0	1451.81	9	5.59238e+06	5.69119e+06	6.58789e+06	5.62428e+06	6.62089e+06	6.03238e+06		2	726.407	9.141e-05	3.18
[K].SCAFAPADVTSEK.[D]	1xCarbamidomethyl [C2]; 1xTMT6plex [K13]; 1xTMT6plex [N-Term]	1	1	6	W5PF12	W5PF12 [57-69]	0	1840.95	13	1.01603e+07	9.73476e+06	1.07231e+07	8.83503e+06	1.00121e+07	9.08687e+06		2	920.972	2.956e-07	3.92
[R].EDALELTEK.[L]	1xTMT6plex [K9]; 1xTMT6plex [N-Term]	1	2	1	W5PYP0	W5PYP0 [149-157]	0	1505.85	9	298722	286591	305903	302372	349925	311099		2	753.427	9.945e-05	2.56
[K].SCAEFLIQSK.[T]	1xCarbamidomethyl [C2]; 1xTMT6plex [K10]; 1xTMT6plex [N-Term]	1	2	3	W5PP37	W5PP37 [100-109]	0	1640.91	10	4.74676e+06	4.80663e+06	5.23413e+06	4.98172e+06	6.22894e+06	5.82808e+06		2	820.953	5.263e-06	3.31
[R].EDAMAMVDHCLK.[K]	1xCarbamidomethyl [C10]; 1xTMT6plex [K12]; 1xTMT6plex [N-Term]	1	1	7	W5Q648	W5Q648 [549-560]	0	1877.93	12	1.06632e+07	8.86342e+06	1.34679e+07	9.52362e+06	1.11439e+07	9.57712e+06		3	626.645	2.03e-06	3.08
[R].SAYQEAMDISK.[K]	1xOxidation [M7]; 1xTMT6plex [K11]; 1xTMT6plex [N-Term]	2	2	14	O77642; W5QAA1	O77642 [149-159]; W5QAA1 [149-159]	0	1716.89	11	1.35949e+07	1.27312e+07	2.04676e+07	1.36515e+07	1.5021e+07	1.18204e+07	Shared	2	858.945	1.327e-05	2.61
[R].SAYQEAMDISK.[K]	1xTMT6plex [K11]; 1xTMT6plex [N-Term]	2	2	8	O77642; W5QAA1	O77642 [149-159]; W5QAA1 [149-159]	0	1700.89	11	4.11652e+07	3.41993e+07	4.1891e+07	5.26037e+07	5.98751e+07	4.34313e+07	Shared	2	850.944	2.694e-06	4.59
[R].EDAPIGPHLQSMPSEQIR.[N]	1xTMT6plex [N-Term]	1	1	2	W5NRL8	W5NRL8 [487-504]	0	2234.14	18	467030	500594	549995	534043	596755	539119		3	745.383	3.232e-06	4.17
[R].EDAQVAAEILEMADTSSGDK.[S]	1xTMT6plex [K20]; 1xTMT6plex [N-Term]	1	1	3	W5PEC3	W5PEC3 [601-620]	0	2538.26	20	151917	144442	136199	184319	159744	172426		3	846.76	1.473e-07	5.08
[K].SAYLMGLNSADLLK.[G]	1xDeamidated [N8]; 1xTMT6plex [K14]; 1xTMT6plex [N-Term]	1	2	1	W5QDF3	W5QDF3 [384-397]	0	1955.09	14	2.41375e+06	2.0574e+06	3779872	2.73942e+06	3.9081e+06	2.5233e+06		2	978.051	1.423e-05	4.07
[K].SAYEFSETESMLK.[I]	1xTMT6plex [K13]; 1xTMT6plex [N-Term]	1	1	8	W5PRR5	W5PRR5 [231-243]	0	1980	13	1.15315e+07	1.08032e+07	1.25359e+07	1.38581e+07	1.33937e+07	1.39547e+07		2	990.503	1.132e-07	3.47
[K].ECSLDSDYFK.[Y]	1xCarbamidomethyl [C2]; 1xTMT6plex [K10]; 1xTMT6plex [N-Term]	1	1	2	W5P8W0	W5P8W0 [594-603]	0	1721.85	10	1.15593e+06	1.09164e+06	1.33982e+06	1.24653e+06	1.34581e+06	1.27995e+06		2	861.419	4.673e-05	3.22
[K].SCPEAIDEIFR.[S]	1xCarbamidomethyl [C2]; 1xTMT6plex [N-Term]	1	2	6	W5PFL8	W5PFL8 [171-181]	0	1565.78	11	5.81848e+06	6.42845e+06	5.88866e+06	9.34094e+06	8.50727e+06	7.57087e+06		2	783.394	9.906e-05	3.89
[R].LDQEVAEVDKNIELLR.[K]	1xTMT6plex [K10]; 1xTMT6plex [N-Term]	1	1	1	W5PID5	W5PID5 [278-293]	1	2342.33	16	1.34183e+06	1.37404e+06	1.71445e+06	1.8859e+06	2294670	1.95536e+06		3	781.445	1.254e-06	4
[R].ECPSDECGAGVFMASHFDR.[H]	2xCarbamidomethyl [C2; C7]; 1xOxidation [M13]; 1xTMT6plex [N-Term]	1	3	5	W5NX91	W5NX91 [135-153]	0	2417.02	19	3.60227e+06	3.14501e+06	4.23879e+06	4.08223e+06	4.82014e+06	4.24027e+06		3	806.338	8.573e-08	4.43
[R].SDALNSAIDK.[M]	1xTMT6plex [K10]; 1xTMT6plex [N-Term]	1	1	3	W5Q5C7	W5Q5C7 [361-370]	0	1491.84	10	8.5412e+06	8.16185e+06	9.18617e+06	9.42606e+06	1.17608e+07	9.77799e+06		2	746.42	6.329e-05	4.04
[K].SDALETLGFLNHYQMK.[N]	1xTMT6plex [K16]; 1xTMT6plex [N-Term]	1	1	3	W5P779	W5P779 [459-474]	0	2325.23	16	1.20712e+07	1.0996e+07	1.18411e+07	1.22967e+07	1.49946e+07	1.22794e+07		3	775.742	1.223e-06	5.36
[K].SDADLTWNSLR.[G]	1xTMT6plex [N-Term]	1	1	2	W5PFC9	W5PFC9 [460-470]	0	1506.77	11	2.45511e+06	1.9422e+06	2.91806e+06	2.5261e+06	2.69482e+06	2.21619e+06		2	753.887	1.481e-05	3.34
[K].KLQDFASTVELLEEGKK.[K]	3xTMT6plex [K1; K16; K17]; 1xTMT6plex [N-Term]	1	2	1	W5PGT5	W5PGT5 [1389-1405]	2	2851.7	17	3.68512e+06	3.73433e+06	3.83775e+06	2.53551e+06	2.72308e+06	2617869		4	713.676	8.263e-06	3.38
[R].ECDTNGWTNDIPICEVVK.[C]	2xCarbamidomethyl [C2; C14]; 1xDeamidated [N5]; 1xTMT6plex [K18]; 1xTMT6plex [N-Term]	2	2	3	W5PFF9; D6PZY4	W5PFF9 [128-145]; D6PZY4 [121-138]	0	2609.26	18	289630	215335	360663	448020	472886	500983	Shared	2	1305.14	1.01e-05	2.87
[R].ECEDVMDWINDK.[E]	1xCarbamidomethyl [C2]; 1xTMT6plex [K12]; 1xTMT6plex [N-Term]	1	1	5	W5PJ75	W5PJ75 [157-168]	0	2011.95	12	1.76382e+06	2.03978e+06	1.82077e+06	2.37696e+06	2.70084e+06	2.07226e+06		2	1006.48	1.558e-06	3.3
[K].KLQDFASTVELLEEGK.[K]	2xTMT6plex [K1; K16]; 1xTMT6plex [N-Term]	1	2	7	W5PGT5	W5PGT5 [1389-1404]	1	2494.44	16	1.46567e+07	1.57847e+07	1.43373e+07	7.66052e+06	8.92958e+06	8.36456e+06		3	832.144	1.261e-09	6.58
[K].KIQDEDNWFEINEYTGDLK.[T]	1xDeamidated [N12]; 2xTMT6plex [K1; K19]; 1xTMT6plex [N-Term]	1	2	1	W5P9V8	W5P9V8 [510-528]	1	3045.57	19	448625	433707	504687	612256	646281	610827		3	1015.87	6.291e-07	4.69
[R].ECELSPGVNR.[D]	1xCarbamidomethyl [C2]; 1xTMT6plex [N-Term]	1	2	3	W5Q255	W5Q255 [489-498]	0	1389.7	10	1.86745e+07	1.18591e+07	1.0322e+07	1.19374e+07	1.12657e+07	9.77263e+06		2	695.352	0.0001189	3.25
[R].SCVDVNECATGFHR.[C]	2xCarbamidomethyl [C2; C8]; 1xTMT6plex [N-Term]	1	1	5	W5QHQ8	W5QHQ8 [915-928]	0	1880.86	14	2.91941e+06	2.87187e+06	3.32173e+06	2.72769e+06	3.14988e+06	2.77937e+06		3	627.625	4.535e-05	5.42
[R].ECEQAGSTAPSVFSR.[A]	1xCarbamidomethyl [C2]; 1xTMT6plex [N-Term]	1	1	1	W5NR30	W5NR30 [50-64]	0	1854.89	15	261170	345145	345350	347826	342915	352021		2	927.948	2.818e-06	2.88
[K].EDASGNIVYEK.[N]	1xTMT6plex [K11]; 1xTMT6plex [N-Term]	1	1	1	W5PT76	W5PT76 [108-118]	0	1682.9	11	727929	986253	556936	381496	412126	392935		2	841.953	5.684e-05	2.39
[K].KIQASTMAFK.[Q]	2xTMT6plex [K1; K10]; 1xTMT6plex [N-Term]	1	1	7	W5PE01	W5PE01 [117-126]	1	1812.1	10	1.97928e+07	1.70514e+07	2.02365e+07	1.92815e+07	2.35801e+07	2.15755e+07		2	906.551	6.027e-05	3.07
[R].ECLPLIIFLR.[N]	1xCarbamidomethyl [C2]; 1xTMT6plex [N-Term]	1	4	3	W5Q8J9	W5Q8J9 [39-48]	0	1502.9	10	2.79497e+06	2.73759e+06	3.05852e+06	2.9957e+06	3.45778e+06	3.27458e+06		2	751.948	5.483e-05	2.98
[R].ECLQALEFLHANQVIHR.[D]	1xCarbamidomethyl [C2]; 1xTMT6plex [N-Term]	1	1	1	W5QGL6	W5QGL6 [351-367]	0	2307.22	17	455537	412005	505510	596190	708249	647740		4	577.557	0.0001157	4.33
[K].ECLQSASLIQSSDPDFR.[I]	1xCarbamidomethyl [C2]; 1xTMT6plex [N-Term]	1	2	3	W5P9V8	W5P9V8 [54-70]	0	2182.06	17	597295	517667	693503	726078	789700	650104		2	1091.53	3.265e-05	2.37
[K].SCVDENLTPQDK.[Q]	1xCarbamidomethyl [C2]; 1xTMT6plex [K12]; 1xTMT6plex [N-Term]	1	1	24	W5P3B2	W5P3B2 [66-77]	0	1863.95	12	1.20276e+08	9.90852e+07	1.27975e+08	8.61416e+07	8.53054e+07	7.34326e+07		2	932.482	3.452e-07	3.43
[K].SCTNPTEDFVQELLAK.[L]	1xCarbamidomethyl [C2]; 1xTMT6plex [K16]; 1xTMT6plex [N-Term]	1	1	1	W5P696	W5P696 [85-100]	0	2310.21	16	750854	754898	806376	395396	529287	422192		3	770.734	1.48e-06	4.2
[K].SCSGVEFSTSGSSNTDTGK.[V]	1xCarbamidomethyl [C2]; 1xTMT6plex [K19]; 1xTMT6plex [N-Term]	1	1	3	W5PG36	W5PG36 [46-64]	0	2366.12	19	2.96233e+06	3.00133e+06	3.18768e+06	3.30073e+06	3.79194e+06	3.2697e+06		2	1183.56	6.887e-10	4.62
[R].SCQQGCPLPGNACPLPTYER.[S]	3xCarbamidomethyl [C2; C6; C13]; 2xDeamidated [Q3; N11]; 1xTMT6plex [N-Term]	1	1	1	W5QI38	W5QI38 [268-287]	0	2536.15	20	1.3702e+06	1.15356e+06	1.2304e+06	1.36031e+06	1.31031e+06	1.1719e+06		2	1268.59	3.226e-06	3.12
[R].SCQQGCPLPGNACPLPTYER.[S]	3xCarbamidomethyl [C2; C6; C13]; 1xDeamidated [N11]; 1xTMT6plex [N-Term]	1	1	2	W5QI38	W5QI38 [268-287]	0	2535.16	20	2.47616e+06	2.22487e+06	2.68878e+06	2.47396e+06	2.83299e+06	2.50695e+06		2	1268.09	4.761e-07	3.76
[R].SCQQGCPLPGNACPLPTYER.[S]	3xCarbamidomethyl [C2; C6; C13]; 1xTMT6plex [N-Term]	1	1	5	W5QI38	W5QI38 [268-287]	0	2534.18	20	8.11335e+06	7.70399e+06	8.59959e+06	8.92446e+06	9.72301e+06	8.46292e+06		2	1267.59	3.782e-09	4.99
[R].SCQDINECEHR.[N]	2xCarbamidomethyl [C2; C8]; 1xTMT6plex [N-Term]	1	1	4	W5PSC8	W5PSC8 [285-295]	0	1676.73	11	1.02478e+06	1.09599e+06	1.13396e+06	826163	905951	808763		2	838.87	3.161e-06	3.21
[R].ECPSDECGAGVFMASHFDR.[H]	2xCarbamidomethyl [C2; C7]; 1xTMT6plex [N-Term]	1	3	16	W5NX91	W5NX91 [135-153]	0	2401.02	19	1.054e+07	9.38934e+06	1.33056e+07	1.23697e+07	1.27835e+07	1.28174e+07		3	801.011	3.196e-09	5.55
[K].SCVDENLTPQDKQDALSALNK.[I]	1xCarbamidomethyl [C2]; 2xTMT6plex [K12; K21]; 1xTMT6plex [N-Term]	1	1	1	W5P3B2	W5P3B2 [66-86]	1	3033.61	21	637135	510589	854451	354629	347981	340586		3	1011.87	5.682e-05	2.71
[R].SAYDSTMETMNYTQIR.[T]	1xTMT6plex [N-Term]	1	2	3	Q2TCH3	Q2TCH3 [577-592]	0	2139.99	16	2.20244e+06	2.09314e+06	2.40645e+06	2.21749e+06	2.33239e+06	2.12492e+06		2	1070.5	1.247e-08	4.21
[R].EDAVFLGNEAQR.[R]	1xTMT6plex [N-Term]	1	1	2	W5QHC9	W5QHC9 [143-154]	0	1577.81	12	350871	244159	325783	378950	409739	368796		2	789.415	4.204e-05	1.98
[R].EDAVLEYLK.[I]	1xTMT6plex [K9]; 1xTMT6plex [N-Term]	1	1	10	W5P4R1	W5P4R1 [273-281]	0	1537.89	9	1.02346e+07	9.38753e+06	1.07545e+07	1.31815e+07	1.45071e+07	1.3277e+07		2	769.447	0.0001307	3.53
[K].EDGAISTIVLR.[G]	1xTMT6plex [N-Term]	1	1	5	W5PYM5	W5PYM5 [368-378]	0	1402.81	11	4.44274e+06	4.05947e+06	5.08699e+06	4.95864e+06	5.38844e+06	5.24483e+06		2	701.911	1.646e-05	3.56
[K].SASLASIDAELQK.[L]	1xTMT6plex [K13]; 1xTMT6plex [N-Term]	1	1	2	W5PVU0	W5PVU0 [527-539]	0	1791.03	13	3.57799e+06	2.76668e+06	3.15043e+06	4.88986e+06	4.56374e+06	3.7392e+06		3	597.678	4.154e-05	3.49
[R].SASGFCQGGGAGGGFGGR.[S]	1xCarbamidomethyl [C6]; 1xTMT6plex [N-Term]	1	1	9	W5Q5Z3	W5Q5Z3 [81-98]	0	1815.84	18	8.64217e+07	7.95341e+07	9.47611e+07	8.38948e+07	9.77806e+07	8.69658e+07		2	908.426	6.271e-10	5.05
[K].EDGGGWWYNR.[C]	1xTMT6plex [N-Term]	1	2	9	W5NQ46	W5NQ46 [430-439]	0	1468.68	10	1.52578e+07	1.24466e+07	1.63828e+07	1.87894e+07	1.82509e+07	1.52863e+07		2	734.839	6.259e-05	3.2
[K].SASDLSEDLFK.[V]	1xTMT6plex [K11]; 1xTMT6plex [N-Term]	1	1	1	W5QGL7	W5QGL7 [593-603]	0	1669.9	11	449770	454826	538372	485664	554444	533461		2	835.455	1.023e-05	3.09
[R].SAQSLSSYNPFEDEDDTGSTVSEKEDIK.[A]	2xTMT6plex [K24; K28]; 1xTMT6plex [N-Term]	1	1	1	W5QCP7	W5QCP7 [354-381]	1	3765.84	28	120612	101511	131531	142122	135188	135372		4	942.214	1.916e-06	3.56
[R].EDGPGIPTDIK.[L]	1xTMT6plex [K11]; 1xTMT6plex [N-Term]	1	1	6	W5Q1R1	W5Q1R1 [312-322]	0	1599.9	11	1.06519e+07	9.76806e+06	1.10427e+07	1.096e+07	1.32573e+07	1.25058e+07		2	800.453	2.966e-05	2.93
[K].EDGQEYAQVIK.[M]	1xTMT6plex [K11]; 1xTMT6plex [N-Term]	1	1	4	B9VH02	B9VH02 [30-40]	0	1737.94	11	2.10694e+06	1.83408e+06	2.16135e+06	2.15717e+06	2.32927e+06	1.95516e+06		2	869.478	1.549e-05	3.85
[R].EDGRPLPSSTQQR.[H]	1xTMT6plex [N-Term]	1	1	22	W5PEL7	W5PEL7 [1576-1588]	0	1699.89	13	2.79307e+07	2.71579e+07	2.68822e+07	2.43443e+07	2.88998e+07	2.52763e+07		3	567.302	2.138e-05	4.49
[R].SAQFEHTLLVTDTGCEILTR.[R]	1xCarbamidomethyl [C15]; 1xTMT6plex [N-Term]	1	1	1	W5Q2N7	W5Q2N7 [316-335]	0	2520.3	20	360499	333842	416197	397067	421941	414830		3	840.765	0.0001163	3.64
[R].EDGYSDASGFGYCFR.[E]	1xCarbamidomethyl [C13]; 1xTMT6plex [N-Term]	1	2	4	W5PA58	W5PA58 [279-293]	0	1959.84	15	1.86179e+06	1.98317e+06	3.07706e+06	1.87357e+06	1.2346e+06	1.25782e+06		2	980.422	4.646e-05	2.58
[K].SASLQQQISDDAGAASSAQGELTEMK.[R]	1xTMT6plex [K26]; 1xTMT6plex [N-Term]	1	1	2	W5Q0V6	W5Q0V6 [285-310]	0	3081.54	26	663511	488556	717831	698777	770117	672652		3	1027.85	1.22e-09	6.9
[R].LDQPMTEIVSR.[V]	1xTMT6plex [N-Term]	1	1	7	W5PVT6	W5PVT6 [1012-1022]	0	1517.82	11	4.11963e+07	37442155	4.61009e+07	4.57942e+07	5.36613e+07	5.02496e+07		2	759.41	9.428e-06	3.06
[K].EDKGTGVVTSVPSDSPDDFAALR.[D]	1xTMT6plex [K3]; 1xTMT6plex [N-Term]	1	1	1	W5Q2Z5	W5Q2Z5 [388-410]	1	2821.46	23	605653	492232	664918	599801	659071	712418		3	941.156	5.045e-08	4.88
[K].EDKLECSEELGDLVK.[S]	1xCarbamidomethyl [C6]; 2xTMT6plex [K3; K15]; 1xTMT6plex [N-Term]	1	1	7	W5PUT6	W5PUT6 [457-471]	1	2451.33	15	2.98616e+07	2.94656e+07	3.99585e+07	3.77721e+07	4.06529e+07	3.74918e+07		3	817.778	1.66e-07	4.86
[K].SAPSVTLFPPSKEELDTNK.[A]	1xDeamidated [N18]; 2xTMT6plex [K12; K19]; 1xTMT6plex [N-Term]	1	1	8	W5PSQ7	W5PSQ7 [134-152]	1	2748.53	19	1.47705e+07	1.47516e+07	1.76187e+07	1.84903e+07	2.19765e+07	1.95716e+07		3	916.85	2.418e-06	3.41
[K].SAPSVTLFPPSKEELDTNK.[A]	2xTMT6plex [K12; K19]; 1xTMT6plex [N-Term]	1	1	61	W5PSQ7	W5PSQ7 [134-152]	1	2747.54	19	1.40497e+08	1.30236e+08	1.66417e+08	1.76692e+08	2.04804e+08	1.78507e+08		3	916.516	1.38e-11	5.37
[R].SAPSLSTCATSEDSLVLYNR.[V]	1xCarbamidomethyl [C8]; 1xTMT6plex [N-Term]	1	1	2	W5PQF8	W5PQF8 [736-755]	0	2400.19	20	921062	758973	1.01373e+06	969796	1.0556e+06	1.00502e+06		3	800.737	7.036e-05	4.56
[K].EDIDAAIETYNLLSEK.[W]	1xTMT6plex [K16]; 1xTMT6plex [N-Term]	1	1	1	W5NT70	W5NT70 [181-196]	0	2282.22	16	301022	291818	367698	399852	382108	359161		3	761.404	2.796e-05	3.55
[K].EDLDKVEPAVIEAQNAVK.[S]	2xTMT6plex [K5; K18]; 1xTMT6plex [N-Term]	1	1	7	W5NYP8	W5NYP8 [3276-3293]	1	2655.52	18	7.55033e+06	7.57192e+06	8.07212e+06	7.7125e+06	8.9854e+06	7.87418e+06		3	885.843	2.852e-08	4.79
[K].SANPGISIGDVAK.[K]	1xTMT6plex [K13]; 1xTMT6plex [N-Term]	1	2	2	W5PG42	W5PG42 [131-143]	0	1686.98	13	4.27097e+06	4.22044e+06	4.71306e+06	3.54261e+06	3.96568e+06	3.61797e+06		2	843.987	2.072e-07	4.42
[R].SANAEDAQELSDVEK.[A]	1xDeamidated [N/Q]; 1xTMT6plex [K15]; 1xTMT6plex [N-Term]	1	1	6	W5NWK8	W5NWK8 [6-20]	0	2065.03	15	455718	360401	509042	550155	624427	588895		3	689.015	0.0001027	2.66
[R].SANAEDAQELSDVEK.[A]	1xTMT6plex [K15]; 1xTMT6plex [N-Term]	1	1	13	W5NWK8	W5NWK8 [6-20]	0	2064.05	15	2.59363e+06	2.29759e+06	2.73678e+06	3.44283e+06	4.11662e+06	3.60587e+06		3	688.687	2.268e-05	4.35
[R].SAMPADAPLCLR.[L]	1xCarbamidomethyl [C10]; 1xTMT6plex [N-Term]	1	1	2	W5NU76	W5NU76 [385-396]	0	1530.8	12	3.37883e+06	4.40383e+06	3.46217e+06	2.81169e+06	3.2338e+06	2.93941e+06		2	765.895	7.231e-06	4.16
[K].SAPVPGESETVIATK.[T]	1xTMT6plex [K15]; 1xTMT6plex [N-Term]	1	1	4	W5Q2I7	W5Q2I7 [832-846]	0	1944.11	15	2.69922e+06	2.61125e+06	3.25563e+06	3.12036e+06	3.08406e+06	2.83831e+06		2	972.551	5.348e-05	2.88
[R].IDSAATSTYELGNPPDYR.[G]	1xTMT6plex [N-Term]	1	1	3	W5P583	W5P583 [42-59]	0	2199.08	18	2.07621e+06	1.63473e+06	2.16585e+06	2.03538e+06	2.34254e+06	2.20015e+06		3	733.693	1.683e-05	4.43
[K].SASLQQQISDDAGAASSAQGELTEMK.[R]	1xDeamidated [Q7]; 1xTMT6plex [K26]; 1xTMT6plex [N-Term]	1	1	1	W5Q0V6	W5Q0V6 [285-310]	0	3082.53	26	167575	157522	177435	179506	195391	164900		3	1028.19	1.368e-09	5.34
[K].SASLQQQISDDAGATTSAR.[N]	1xDeamidated [Q]; 1xTMT6plex [N-Term]	1	2	5	B0LKN9	B0LKN9 [283-301]	0	2137.06	19	1.4583e+06	1.24861e+06	1.73648e+06	1.56493e+06	1.66645e+06	1.60114e+06		3	713.03	1.648e-05	2.81
[K].EDAVSAALK.[G]	1xTMT6plex [K9]; 1xTMT6plex [N-Term]	1	1	23	W5Q2E1	W5Q2E1 [177-185]	0	1361.8	9	1.12507e+08	1.09144e+08	1.04234e+08	1.02675e+08	1.28019e+08	9.87728e+07		2	681.406	4.312e-05	3.42
[R].SAVQDLSSSILASEDPEER.[G]	1xTMT6plex [N-Term]	1	1	1	W5NQC1	W5NQC1 [360-378]	0	2262.13	19	104620	92832.2	129862	124564	126721	125005		3	754.713	5.383e-05	2.96
[R].EDCSPDEFIDVIVGNR.[V]	1xCarbamidomethyl [C3]; 1xTMT6plex [N-Term]	1	1	3	W5NSE1	W5NSE1 [222-237]	0	2094	16	720014	192547	229007	207494	222638	218680		3	698.673	8.394e-05	3.36
[K].SAVPAVAAAASAEPADK.[N]	1xTMT6plex [K17]; 1xTMT6plex [N-Term]	1	3	7	C3V6M4	C3V6M4 [181-197]	0	1984.11	17	1.12049e+07	1.08656e+07	1.19328e+07	1.31738e+07	1.64202e+07	1.50223e+07		2	992.556	7.175e-08	4.46
[QK].SAVGFEYQGK.[T]	1xTMT6plex [K10]; 1xTMT6plex [N-Term]	1	2	3	W5NQM5	W5NQM5 [108-117]; [182-191]	0	1543.85	10	6.49786e+06	5.75402e+06	7.7696e+06	7685768	9.94238e+06	8.60234e+06		2	772.428	9e-05	2.43
[R].EDDPYCVTCFGELFAPK.[C]	2xCarbamidomethyl [C6; C9]; 1xTMT6plex [K17]; 1xTMT6plex [N-Term]	1	2	1	W5QFC2	W5QFC2 [214-230]	0	2506.2	17	663963	492344	690280	656260	701138	632773		3	836.066	5.605e-05	2.96
[K].SAVGFDYQGETEK.[H]	1xTMT6plex [K13]; 1xTMT6plex [N-Term]	1	2	1	W5NQM5	W5NQM5 [145-157]	0	1888.97	13	2.3819e+06	2.39529e+06	2.3624e+06	2.63927e+06	3.06432e+06	2.4414e+06		2	944.984	9.109e-07	3.32
[K].SAVESGQADDEHVR.[E]	1xTMT6plex [N-Term]	1	1	4	W5Q0H0	W5Q0H0 [178-191]	0	1728.84	14	2.45333e+06	2.17736e+06	2.53427e+06	2.48037e+06	2.63347e+06	2.45521e+06		3	576.948	1.75e-05	3.76
[K].SAVENCQDSWR.[R]	1xCarbamidomethyl [C6]; 1xTMT6plex [N-Term]	1	2	5	P00349	P00349 [397-407]	0	1580.73	11	6.59552e+06	6.36269e+06	7.35656e+06	7.49895e+06	9.51169e+06	8.34955e+06		2	790.87	1.139e-05	3.2
[K].SAVEKGEELSCEER.[N]	1xCarbamidomethyl [C11]; 1xTMT6plex [K5]; 1xTMT6plex [N-Term]	2	2	22	O77642; W5QAA1	O77642 [28-41]; W5QAA1 [28-41]	1	2081.06	14	5.99798e+07	5.12237e+07	7.20035e+07	6.26839e+07	8.28493e+07	6.36223e+07	Shared	3	694.356	4.671e-06	3.06
[K].EDEILEAVEIINK.[T]	1xTMT6plex [K13]; 1xTMT6plex [N-Term]	1	1	6	W5PK12	W5PK12 [422-434]	0	1973.12	13	745197	763418	915329	1.07513e+06	1.17189e+06	976508		2	987.068	6.704e-07	2.59
[K].SASLQQQISDDAGATTSAR.[N]	1xTMT6plex [N-Term]	1	2	20	B0LKN9	B0LKN9 [283-301]	0	2136.07	19	9.72384e+06	7.75213e+06	1.06566e+07	9.98786e+06	1.16553e+07	1.06529e+07		2	1068.54	6.111e-09	3.95
[K].EDEIPETVSFEMLDAAK.[N]	1xTMT6plex [K17]; 1xTMT6plex [N-Term]	1	2	6	W5QFW8	W5QFW8 [80-96]	0	2382.22	17	930592	934477	1.03517e+06	1.38207e+06	1.53023e+06	1.47534e+06		3	794.744	5.036e-05	3.77
[truncated: 35,172 more rows]
