# Supplementary material for: MiR-199a-3p Regulates the PTPRF/β-Catenin Axis in Hair Follicle Development: Insights into the Pathogenic Mechanism of Alopecia Areata
Source: Int J Mol Sci. 2023 Dec 18;24(24):17632. doi: 10.3390/ijms242417632 (PMC10743674; doi:10.3390/ijms242417632)
Supplement: Supplementary file 1 [file ijms-24-17632-s001.zip › Table S3.xlsx]

## Sheet: Sheet1
Table S3. The protein quantification and differential expression analysis results in the process of proteomic sequencing
Description	Gene symbol	log2FC	-log10P
Uncharacterized protein OS=Ovis aries OX=9940 PE=3 SV=1		2.84847	3.07545
Adenylate cyclase type 8 OS=Ovis aries OX=9940 GN=ADCY8 PE=3 SV=1	ADCY8	2.53905	4.52375
Uncharacterized protein OS=Ovis aries OX=9940 PE=4 SV=1		2.22972	5.26907
Uncharacterized protein OS=Ovis aries OX=9940 GN=LOC114117806 PE=4 SV=1	LOC114117806	2.19275	5.23223
Protein tyrosine phosphatase receptor type F OS=Ovis aries OX=9940 GN=PTPRF PE=3 SV=1	PTPRF	2.05335	4.07156
Lipocln_cytosolic_FA-bd_dom domain-containing protein OS=Ovis aries OX=9940 PE=3 SV=1	LOC101116281	2.0097	2.27418
Lipocln_cytosolic_FA-bd_dom domain-containing protein OS=Ovis aries OX=9940 PE=3 SV=1		1.90377	1.9424
Hemoglobin fetal subunit beta OS=Ovis aries OX=9940 PE=1 SV=1	LOC101106199	1.66779	3.00953
Macro domain-containing protein OS=Ovis aries OX=9940 PE=4 SV=1		1.59479	3.38648
Lipocln_cytosolic_FA-bd_dom domain-containing protein OS=Ovis aries OX=9940 GN=LOC101116799 PE=3 SV=1	LOC101116799	1.42464	3.38876
Alpha-2-HS-glycoprotein OS=Ovis aries OX=9940 GN=AHSG PE=4 SV=1	AHSG	1.42219	3.70238
Myosin light chain 4 OS=Ovis aries OX=9940 GN=MYL4 PE=2 SV=1	MYL4	1.33106	1.48209
Beta-lactoglobulin-1/B OS=Ovis aries OX=9940 PE=1 SV=1	BLG; PAEP	1.26083	0.715852
Troponin C OS=Ovis aries OX=9940 PE=2 SV=1	TNCC2; TNNC2	1.23149	1.33232
Troponin I type 2 OS=Ovis aries OX=9940 PE=2 SV=1		1.22968	1.22027
Myosin light chain, phosphorylatable, fast skeletal muscle OS=Ovis aries OX=9940 GN=MYLPF PE=4 SV=1	MYLPF	1.19737	1.13502
Uncharacterized protein OS=Ovis aries OX=9940 GN=MYL1 PE=4 SV=1	MYL1	1.17466	1.21269
Protein S100 OS=Ovis aries OX=9940 GN=LOC101104285 PE=3 SV=1	LOC101104285	1.14466	3.57329
Lipocln_cytosolic_FA-bd_dom domain-containing protein OS=Ovis aries OX=9940 PE=3 SV=1	LOC101116537	1.11138	2.76016
Uncharacterized protein OS=Ovis aries OX=9940 GN=FBN2 PE=3 SV=1	FBN2	1.03543	2.4824
IF rod domain-containing protein OS=Ovis aries OX=9940 PE=3 SV=1		1.02722	0.807193
Uncharacterized protein OS=Ovis aries OX=9940 GN=LOC114117976 PE=4 SV=1	LOC114117976	1.0215	2.1244
Serum amyloid A protein OS=Ovis aries OX=9940 GN=LOC101120204 PE=3 SV=1	LOC101120204	1.00486	2.71992
Serum amyloid A protein OS=Ovis aries OX=9940 GN=LOC105601867 PE=3 SV=1	LOC105601867	0.979688	2.3594
Uncharacterized protein OS=Ovis aries OX=9940 GN=MYH8 PE=3 SV=1	MYH8	0.975998	0.688626
Uncharacterized protein OS=Ovis aries OX=9940 GN=TPM2 PE=3 SV=1	TPM2	0.970663	1.17701
Isocitrate dehydrogenase [NADP] cytoplasmic OS=Ovis aries OX=9940 GN=IDH1 PE=2 SV=1	IDH1	0.962249	2.93548
Uncharacterized protein OS=Ovis aries OX=9940 GN=MYH2 PE=3 SV=1	MYH2	0.961321	1.10258
Alpha-1-antitrypsin transcript variant 1 OS=Ovis aries OX=9940 GN=SERPINA1 PE=2 SV=1	SERPINA1	0.960545	3.58198
Carbonate dehydratase IV OS=Ovis aries OX=9940 GN=CA4 PE=3 SV=1	CA4	0.952448	2.69129
Protein phosphatase 1 regulatory inhibitor subunit 14A OS=Ovis aries OX=9940 GN=PPP1R14A PE=3 SV=1	PPP1R14A	0.898393	3.8655
LRRNT domain-containing protein OS=Ovis aries OX=9940 GN=KERA PE=4 SV=1	KERA	0.896416	4.12507
Calcium-transporting ATPase OS=Ovis aries OX=9940 GN=ATP2A1 PE=3 SV=1	ATP2A1	0.890986	1.11025
Uncharacterized protein OS=Ovis aries OX=9940 GN=MYH1 PE=3 SV=1	MYH1	0.883857	0.902538
TPM1 OS=Ovis aries OX=9940 PE=2 SV=1	TPM1	0.840238	3.4019
Complex I-B14 OS=Ovis aries OX=9940 GN=NDUFA6 PE=1 SV=1	NDUFA6	0.823476	2.1308
Atrophin 1 OS=Ovis aries OX=9940 GN=ATN1 PE=4 SV=1	ATN1	0.783882	3.45847
Uncharacterized protein OS=Ovis aries OX=9940 GN=SCGB2A2 PE=4 SV=1	SCGB2A2	0.783726	1.70939
Myelin peripheral protein OS=Ovis aries OX=9940 GN=MPZ PE=3 SV=1	MPZ	0.783146	1.89342
Lymphatic vessel endothelial hyaluronan receptor 1 OS=Ovis aries OX=9940 GN=LYVE1 PE=4 SV=1	LYVE1	0.764389	3.54806
Uncharacterized protein OS=Ovis aries OX=9940 GN=TPM2 PE=3 SV=1	TPM2	0.763989	3.88468
SLC39A7 OS=Ovis aries OX=9940 GN=SLC39A7 PE=2 SV=1	SLC39A7	0.762541	4.67325
Uncharacterized protein OS=Ovis aries OX=9940 PE=3 SV=1		0.755013	3.94684
Uncharacterized protein OS=Ovis aries OX=9940 PE=3 SV=1		0.750573	2.41462
PDZ domain containing 2 OS=Ovis aries OX=9940 GN=PDZD2 PE=4 SV=1	PDZD2	0.748	5.03104
Creatine kinase OS=Ovis aries OX=9940 GN=CKM PE=3 SV=1	CKM	0.740955	0.813974
Family with sequence similarity 50 member A OS=Ovis aries OX=9940 GN=FAM50A PE=4 SV=1	FAM50A	0.738662	2.35909
Keratin 4 OS=Ovis aries OX=9940 GN=KRT4 PE=3 SV=1	KRT4	0.738207	0.995844
Adipocyte-type fatty acid-binding protein OS=Ovis aries OX=9940 GN=FABP4 PE=2 SV=1	FABP4	0.735252	3.78806
Signal transducer and activator of transcription OS=Ovis aries OX=9940 GN=STAT3 PE=3 SV=1	STAT3	0.720939	1.05954
FIP-RBD domain-containing protein OS=Ovis aries OX=9940 PE=4 SV=1		0.717647	2.50871
Myosin binding protein C, slow type OS=Ovis aries OX=9940 GN=MYBPC1 PE=4 SV=1	MYBPC1	0.713155	1.16565
IF rod domain-containing protein OS=Ovis aries OX=9940 GN=DES PE=3 SV=1	DES	0.708953	2.08198
Collagen type I alpha 1 chain OS=Ovis aries OX=9940 GN=COL1A1 PE=4 SV=1	COL1A1	0.708583	2.45566
Keratin 78 OS=Ovis aries OX=9940 GN=KRT78 PE=3 SV=1	KRT78	0.707762	1.19882
DNA-directed RNA polymerase subunit beta OS=Ovis aries OX=9940 GN=POLR2B PE=3 SV=1	POLR2B	0.705158	2.08053
VWFC domain-containing protein OS=Ovis aries OX=9940 GN=ECM2 PE=4 SV=1	ECM2	0.702451	4.82964
Peroxisomal biogenesis factor 11 beta OS=Ovis aries OX=9940 GN=PEX11B PE=4 SV=1	PEX11B	0.701642	0.528631
Uncharacterized protein OS=Ovis aries OX=9940 GN=MYH3 PE=3 SV=1	MYH3	0.687998	0.506902
Uncharacterized protein OS=Ovis aries OX=9940 GN=ZC3HC1 PE=4 SV=1	ZC3HC1	0.678236	0.753282
Zinc finger CCCH-type containing 4 OS=Ovis aries OX=9940 GN=ZC3H4 PE=4 SV=1	ZC3H4	0.674587	1.27145
RNA polymerase II subunit A C-terminal domain phosphatase OS=Ovis aries OX=9940 GN=CTDP1 PE=4 SV=1	CTDP1	0.669749	0.423722
Collagen type XIV alpha 1 chain OS=Ovis aries OX=9940 GN=COL14A1 PE=4 SV=1	COL14A1	0.661251	2.37976
Uncharacterized protein OS=Ovis aries OX=9940 GN=MYH11 PE=3 SV=1	MYH11	0.654696	2.80834
Troponin T, fast skeletal muscle OS=Ovis aries OX=9940 GN=TNNT3 PE=3 SV=1	TNNT3	0.652742	1.08275
Polyadenylate-binding protein OS=Ovis aries OX=9940 GN=PABPC1L PE=3 SV=1	PABPC1L	0.648099	2.58532
RAB32, member RAS oncogene family OS=Ovis aries OX=9940 GN=RAB32 PE=3 SV=1	RAB32	0.638259	1.35826
Tyrosinase-related protein 1 OS=Ovis aries OX=9940 GN=TYRP1 PE=3 SV=1	TYRP1	0.624426	1.14795
CMP/dCMP-type deaminase domain-containing protein OS=Ovis aries OX=9940 GN=APOBEC2 PE=4 SV=1	APOBEC2	0.624061	0.923906
SMK-1 domain-containing protein OS=Ovis aries OX=9940 GN=PPP4R3A PE=3 SV=1	PPP4R3A	0.622822	0.91405
Eukaryotic elongation factor 2 kinase OS=Ovis aries OX=9940 GN=EEF2K PE=3 SV=1	EEF2K	0.612925	2.66314
FABP domain-containing protein OS=Ovis aries OX=9940 GN=FABP7 PE=3 SV=1	FABP7	0.610767	1.19786
BTB domain-containing protein OS=Ovis aries OX=9940 GN=KLHL41 PE=4 SV=1	KLHL41	0.607501	1.03569
RNA polymerase II-associated factor 1 homolog OS=Ovis aries OX=9940 GN=PAF1 PE=3 SV=1	PAF1	0.602718	1.03442
5-hydroxyisourate hydrolase OS=Ovis aries OX=9940 PE=3 SV=1		0.598181	4.2186
FRAS1 related extracellular matrix 2 OS=Ovis aries OX=9940 GN=FREM2 PE=3 SV=1	FREM2	0.59814	3.08049
Fibrillar collagen NC1 domain-containing protein OS=Ovis aries OX=9940 GN=COL1A2 PE=4 SV=1	COL1A2	0.59671	2.27327
Carbonic anhydrase OS=Ovis aries OX=9940 GN=CA3 PE=3 SV=1	CA3	0.595027	0.534296
Apolipoprotein A5 OS=Ovis aries OX=9940 GN=APOA5 PE=3 SV=1	APOA5	0.590228	1.29797
Myelin P2 protein OS=Ovis aries OX=9940 GN=PMP2 PE=3 SV=1	PMP2	0.590178	1.83793
Non-specific serine/threonine protein kinase OS=Ovis aries OX=9940 GN=PAK1 PE=4 SV=1	PAK1	0.578758	1.28804
Uncharacterized protein OS=Ovis aries OX=9940 GN=ACTN3 PE=3 SV=1	ACTN3	0.576321	0.453407
Elongator complex protein 4 OS=Ovis aries OX=9940 GN=ELP4 PE=3 SV=1	ELP4	0.575238	1.56318
USE1-like protein OS=Ovis aries OX=9940 GN=USE1 PE=3 SV=1	USE1	0.572565	1.73232
Uncharacterized protein OS=Ovis aries OX=9940 GN=MCFD2 PE=4 SV=1	MCFD2	0.562191	2.0656
Smoothelin OS=Ovis aries OX=9940 GN=SMTN PE=4 SV=1	SMTN	0.553995	3.38445
2-phospho-D-glycerate hydro-lyase OS=Ovis aries OX=9940 GN=ENO3 PE=3 SV=1	ENO3	0.551257	0.780223
Uncharacterized protein OS=Ovis aries OX=9940 GN=LXN PE=3 SV=1	LXN	0.549591	4.0977
Peptidylprolyl isomerase OS=Ovis aries OX=9940 GN=FKBP7 PE=4 SV=1	FKBP7	0.54657	1.20428
IF rod domain-containing protein OS=Ovis aries OX=9940 PE=3 SV=1		0.540956	2.44295
Uncharacterized protein OS=Ovis aries OX=9940 PE=4 SV=1		0.539951	1.30504
CN hydrolase domain-containing protein OS=Ovis aries OX=9940 GN=VNN1 PE=3 SV=1	VNN1	0.535796	1.76077
Procollagen-proline 4-dioxygenase OS=Ovis aries OX=9940 GN=P4HA2 PE=3 SV=1	P4HA2	0.533227	1.72454
Myoglobin OS=Ovis aries OX=9940 GN=MB PE=1 SV=2	MB	0.531292	0.434446
Guanine nucleotide binding protein alpha activating activity polypeptide O (Fragment) OS=Ovis aries OX=9940 GN=GNAO1 PE=2 SV=1	GNAO1	0.529082	2.56836
Alpha-1-acid glycoprotein OS=Ovis aries OX=9940 GN=LOC101103947 PE=3 SV=1	LOC101103947	0.526333	1.8887
Interferon-induced double-stranded RNA-activated protein kinase OS=Ovis aries OX=9940 GN=eIF2aK2 PE=2 SV=1	eIF2aK2	0.523031	3.68319
Glycoprotein IIIb OS=Ovis aries OX=9940 PE=3 SV=1	LOC101115115	0.522483	2.63908
Type I collagen alpha 1 (Fragment) OS=Ovis aries OX=9940 GN=COL1A1 PE=2 SV=1	COL1A1	0.518392	1.70565
Sas10 domain-containing protein OS=Ovis aries OX=9940 GN=UTP3 PE=3 SV=1	UTP3	0.517374	1.99561
Beta-1 metal-binding globulin OS=Ovis aries OX=9940 GN=TF PE=3 SV=1	TF	0.512243	1.34951
Transforming growth factor beta receptor 3 OS=Ovis aries OX=9940 GN=TGFBR3 PE=4 SV=1	TGFBR3	0.510497	2.62967
Peptidyl-prolyl cis-trans isomerase OS=Ovis aries OX=9940 PE=3 SV=1		0.509173	2.89331
Collagen type II alpha 1 chain OS=Ovis aries OX=9940 GN=COL2A1 PE=4 SV=1	COL2A1	0.504542	1.54244
Uncharacterized protein OS=Ovis aries OX=9940 GN=MYOZ1 PE=3 SV=1	MYOZ1	0.49996	0.790607
160 kDa neurofilament protein OS=Ovis aries OX=9940 GN=NEFM PE=3 SV=1	NEFM	0.499896	1.20558
Uncharacterized protein OS=Ovis aries OX=9940 GN=RAP1B PE=3 SV=1	RAP1B	0.49787	2.81416
Uncharacterized protein OS=Ovis aries OX=9940 GN=PRKRIP1 PE=3 SV=1	PRKRIP1	0.49461	3.01536
A2M domain-containing protein OS=Ovis aries OX=9940 PE=4 SV=1	LOC105605927	0.490101	2.32803
Myosin heavy chain 4 OS=Ovis aries OX=9940 GN=MYH4 PE=3 SV=1	MYH4	0.489282	0.283055
Methenyltetrahydrofolate cyclohydrolase OS=Ovis aries OX=9940 GN=MTHFD2 PE=3 SV=1	MTHFD2	0.486503	0.357983
Yes-associated protein 1 OS=Ovis aries OX=9940 GN=YAP1 PE=2 SV=2	YAP1	0.482851	1.63334
AT-rich interaction domain 1B OS=Ovis aries OX=9940 GN=ARID1B PE=4 SV=1	ARID1B	0.481749	0.979944
SERPIN domain-containing protein OS=Ovis aries OX=9940 GN=LOC101103612 PE=3 SV=1	LOC101103612	0.481597	2.00331
Prostaglandin E synthase OS=Ovis aries OX=9940 GN=PTGES PE=3 SV=1	PTGES	0.478039	4.23329
Uncharacterized protein OS=Ovis aries OX=9940 GN=MYOM2 PE=4 SV=1	MYOM2	0.472779	0.923226
RWD domain containing 1 OS=Ovis aries OX=9940 GN=RWDD1 PE=4 SV=1	RWDD1	0.470684	1.92227
CD163 molecule OS=Ovis aries OX=9940 GN=CD163 PE=4 SV=1	CD163	0.470243	2.69793
MHC class I antigen OS=Ovis aries OX=9940 GN=OLA-I PE=2 SV=1	OLA-I	0.46999	1.57579
FHA domain-containing protein OS=Ovis aries OX=9940 GN=SLMAP PE=4 SV=1	SLMAP	0.466963	2.51897
Glycogen phosphorylase, brain form OS=Ovis aries OX=9940 GN=PYGB PE=2 SV=3	PYGB	0.466287	0.741534
Uncharacterized protein OS=Ovis aries OX=9940 PE=4 SV=1		0.463807	2.36301
Latent transforming growth factor beta binding protein 4 OS=Ovis aries OX=9940 GN=LTBP4 PE=4 SV=1	LTBP4	0.463798	2.65819
Endothelial differentiation related factor 1 OS=Ovis aries OX=9940 GN=EDF1 PE=4 SV=1	EDF1	0.463007	2.60369
Integrin subunit alpha 8 OS=Ovis aries OX=9940 GN=ITGA8 PE=3 SV=1	ITGA8	0.455991	2.33163
Myosin light chain 3 OS=Ovis aries OX=9940 GN=MYL3 PE=2 SV=1	MYL3	0.454007	1.46799
Nucleobindin 2 OS=Ovis aries OX=9940 GN=NUCB2 PE=3 SV=1	NUCB2	0.446028	2.24956
Apolipoprotein A4 OS=Ovis aries OX=9940 GN=APOA4 PE=3 SV=1	APOA4	0.443136	2.17512
Sarcalumenin OS=Ovis aries OX=9940 GN=SRL PE=4 SV=1	SRL	0.440311	0.795148
Uncharacterized protein OS=Ovis aries OX=9940 GN=PACSIN3 PE=4 SV=1	PACSIN3	0.439284	1.5046
Uncharacterized protein OS=Ovis aries OX=9940 PE=4 SV=1		0.438276	1.61902
Keratin, high-sulfur matrix protein, IIIA3A OS=Ovis aries OX=9940 PE=1 SV=1		0.436219	0.717254
Secernin 3 OS=Ovis aries OX=9940 GN=SCRN3 PE=3 SV=1	SCRN3	0.432912	2.38595
Carnitine O-palmitoyltransferase OS=Ovis aries OX=9940 GN=CPT1A PE=3 SV=1	CPT1A	0.432226	1.45299
Myosin light chain 9 OS=Ovis aries OX=9940 GN=MYL9 PE=4 SV=1	MYL9	0.431991	2.15893
Lamin B1 (Fragment) OS=Ovis aries OX=9940 PE=2 SV=1	LOC100037680; LMNB1	0.429777	2.75022
Cofilin 2 OS=Ovis aries OX=9940 GN=CFL2 PE=3 SV=1	CFL2	0.428803	3.59003
PLAC domain-containing protein OS=Ovis aries OX=9940 GN=ADAMTSL4 PE=4 SV=1	ADAMTSL4	0.423578	1.90441
Uncharacterized protein OS=Ovis aries OX=9940 GN=PGM5 PE=3 SV=1	PGM5	0.422141	3.15185
Nebulin OS=Ovis aries OX=9940 GN=NEB PE=4 SV=1	NEB	0.421196	0.736911
Fibulin-5 OS=Ovis aries OX=9940 GN=FBLN5 PE=3 SV=1	FBLN5	0.419317	1.59877
Mx1 protein OS=Ovis aries OX=9940 PE=2 SV=1	MX1	0.418639	3.9065
Uncharacterized protein OS=Ovis aries OX=9940 PE=4 SV=1		0.412842	4.39264
Titin OS=Ovis aries OX=9940 PE=3 SV=1		0.411017	1.10129
Asporin OS=Ovis aries OX=9940 GN=ASPN PE=3 SV=1	ASPN	0.410626	1.7417
Peptidylprolyl isomerase OS=Ovis aries OX=9940 GN=FKBP10 PE=4 SV=1	FKBP10	0.410554	1.54428
Uncharacterized protein OS=Ovis aries OX=9940 GN=TPM1 PE=3 SV=1	TPM1	0.404992	2.06526
Saposin B-type domain-containing protein OS=Ovis aries OX=9940 GN=CNPY2 PE=3 SV=1	CNPY2	0.404069	2.18655
Interferon induced protein with tetratricopeptide repeats 3 OS=Ovis aries OX=9940 GN=IFIT3 PE=4 SV=1	IFIT3	0.390923	4.45513
Vacuolar protein sorting-associated protein 53 homolog OS=Ovis aries OX=9940 GN=VPS53 PE=3 SV=1	VPS53	0.38992	3.56905
Nuclear receptor coactivator OS=Ovis aries OX=9940 GN=NCOA2 PE=3 SV=1	NCOA2	0.387875	2.64128
Serine and arginine repetitive matrix 1 OS=Ovis aries OX=9940 GN=SRRM1 PE=4 SV=1	SRRM1	0.387711	3.16956
Mothers against decapentaplegic homolog OS=Ovis aries OX=9940 GN=SMAD1 PE=3 SV=1	SMAD1	0.381038	2.31872
Calumenin OS=Ovis aries OX=9940 GN=CALU PE=3 SV=1	CALU	0.379103	1.81543
Sirtuin 1 OS=Ovis aries OX=9940 GN=SIRT1 PE=4 SV=1	SIRT1	0.378979	1.84614
Secretion regulating guanine nucleotide exchange factor OS=Ovis aries OX=9940 GN=SERGEF PE=4 SV=1	SERGEF	0.377644	0.514583
Uncharacterized protein OS=Ovis aries OX=9940 GN=ACSM1 PE=3 SV=1	ACSM1	0.376731	2.52163
Uncharacterized protein OS=Ovis aries OX=9940 GN=INTS13 PE=3 SV=1	INTS13	0.375671	0.333488
MAF bZIP transcription factor F OS=Ovis aries OX=9940 GN=MAFF PE=4 SV=1	MAFF	0.375299	1.86052
Uncharacterized protein OS=Ovis aries OX=9940 PE=4 SV=1	LOC101113328	0.375211	2.2341
Myosin light chain kinase, smooth muscle OS=Ovis aries OX=9940 GN=MYLK PE=3 SV=1	MYLK	0.373485	3.94777
Sorbin and SH3 domain containing 1 OS=Ovis aries OX=9940 GN=SORBS1 PE=4 SV=1	SORBS1	0.373411	2.91387
Collagen type VI alpha 6 chain OS=Ovis aries OX=9940 GN=COL6A6 PE=4 SV=1	COL6A6	0.3723	2.68003
LIM and senescent cell antigen-like-containing domain protein OS=Ovis aries OX=9940 GN=LIMS2 PE=4 SV=1	LIMS2	0.37186	2.57635
Glyceraldehyde-3-phosphate dehydrogenase OS=Ovis aries OX=9940 PE=3 SV=1		0.371017	0.399218
J domain-containing protein OS=Ovis aries OX=9940 GN=DNAJB12 PE=4 SV=1	DNAJB12	0.370594	3.07205
Hair keratin type II intermediate filament (Fragment) OS=Ovis aries OX=9940 GN=KRT2.11 PE=2 SV=1	KRT2.11	0.369936	2.06743
72 kDa gelatinase OS=Ovis aries OX=9940 GN=MMP2 PE=3 SV=1	MMP2	0.369563	3.13527
Cysteine and glycine-rich protein 3 OS=Ovis aries OX=9940 GN=CSRP3 PE=2 SV=1	CSRP3	0.368375	0.546868
Uncharacterized protein OS=Ovis aries OX=9940 GN=ATXN7L3B PE=4 SV=1	ATXN7L3B	0.366133	0.88278
Periaxin OS=Ovis aries OX=9940 GN=PRX PE=4 SV=1	PRX	0.365834	1.89204
Epimerase_2 domain-containing protein OS=Ovis aries OX=9940 GN=GNE PE=4 SV=1	GNE	0.363962	1.6214
Acyltransferase OS=Ovis aries OX=9940 PE=3 SV=1		0.362431	3.00695
Uncharacterized protein OS=Ovis aries OX=9940 PE=3 SV=1		0.359732	1.54793
RNA helicase OS=Ovis aries OX=9940 GN=DDX50 PE=3 SV=1	DDX50	0.359714	0.848537
DNA polymerase delta subunit 3 OS=Ovis aries OX=9940 GN=POLD3 PE=4 SV=1	POLD3	0.355603	0.621054
Uncharacterized protein OS=Ovis aries OX=9940 GN=COL3A1 PE=4 SV=1	COL3A1	0.350517	1.489
Conserved oligomeric Golgi complex subunit 1 OS=Ovis aries OX=9940 GN=COG1 PE=3 SV=1	COG1	0.349319	2.51692
ATP synthase membrane subunit 6.8PL OS=Ovis aries OX=9940 GN=ATP5MPL PE=4 SV=1	ATP5MPL	0.348039	1.65995
Epsilon-sarcoglycan OS=Ovis aries OX=9940 GN=SGCE PE=3 SV=1	SGCE	0.346217	2.15936
RNAse_Pc domain-containing protein OS=Ovis aries OX=9940 PE=3 SV=1	LOC101114959	0.345871	2.19984
Histone H2B OS=Ovis aries OX=9940 GN=H2BU1 PE=3 SV=1	H2BU1	0.345279	3.19966
Peptidylprolyl isomerase OS=Ovis aries OX=9940 GN=FKBP5 PE=4 SV=1	FKBP5	0.345113	3.38527
Uncharacterized protein OS=Ovis aries OX=9940 PE=4 SV=1		0.344535	2.98116
Myosin light chain 6 (Fragment) OS=Ovis aries OX=9940 PE=2 SV=1	MYL6	0.340586	1.29849
Uncharacterized protein OS=Ovis aries OX=9940 GN=GRN PE=3 SV=1	GRN	0.339964	3.9662
Uncharacterized protein OS=Ovis aries OX=9940 PE=4 SV=1		0.338451	1.03874
C-type lectin domain-containing protein OS=Ovis aries OX=9940 GN=LOC101102057 PE=4 SV=1	LOC101102057	0.33769	3.80666
Thrombospondin 2 OS=Ovis aries OX=9940 GN=THBS2 PE=4 SV=1	THBS2	0.336516	2.14811
Histone H3 OS=Ovis aries OX=9940 GN=H3C15 PE=3 SV=1	H3C15	0.336023	1.3166
Procollagen-proline 4-dioxygenase OS=Ovis aries OX=9940 GN=P4HA1 PE=3 SV=1	P4HA1	0.335773	2.3704
Uncharacterized protein OS=Ovis aries OX=9940 PE=3 SV=1		0.335693	2.89098
Serine/threonine kinase 25 OS=Ovis aries OX=9940 GN=STK25 PE=4 SV=1	STK25	0.33503	1.1531
Uncharacterized protein OS=Ovis aries OX=9940 GN=CGREF1 PE=4 SV=1	CGREF1	0.334092	0.966049
Malectin OS=Ovis aries OX=9940 GN=MLEC PE=3 SV=1	MLEC	0.332751	2.28058
Thymosin beta OS=Ovis aries OX=9940 GN=ThymB4X PE=2 SV=1	ThymB4X	0.331845	0.425234
Histone H2A OS=Ovis aries OX=9940 GN=H2AX PE=3 SV=1	H2AX	0.331838	1.37277
Ig-like domain-containing protein OS=Ovis aries OX=9940 GN=NEXN PE=4 SV=1	NEXN	0.331461	2.70319
Cytochrome P450 2A6 (Fragment) OS=Ovis aries OX=9940 GN=CYP2A6 PE=2 SV=1	CYP2A6	0.325371	0.932843
Uncharacterized protein OS=Ovis aries OX=9940 GN=CAB39 PE=3 SV=1	CAB39	0.324694	2.44216
Glutamine--fructose-6-phosphate transaminase (isomerizing) OS=Ovis aries OX=9940 GN=GFPT2 PE=4 SV=1	GFPT2	0.323099	1.87749
Integrin subunit alpha 5 OS=Ovis aries OX=9940 GN=ITGA5 PE=3 SV=1	ITGA5	0.322583	1.93724
Fatty acyl-CoA reductase OS=Ovis aries OX=9940 GN=FAR2 PE=3 SV=1	FAR2	0.319808	2.69087
Uncharacterized protein OS=Ovis aries OX=9940 GN=WDR75 PE=4 SV=1	WDR75	0.319702	0.643781
14_3_3 domain-containing protein OS=Ovis aries OX=9940 GN=YWHAH PE=3 SV=1	YWHAH	0.314718	3.11074
SH3 and PX domains 2B OS=Ovis aries OX=9940 GN=SH3PXD2B PE=3 SV=1	SH3PXD2B	0.314304	1.69499
ILK associated serine/threonine phosphatase OS=Ovis aries OX=9940 GN=ILKAP PE=3 SV=1	ILKAP	0.313198	1.88805
Angiotensin 1-10 OS=Ovis aries OX=9940 GN=AGT PE=3 SV=1	AGT	0.31302	1.10373
BCL2-associated athanogene 6 OS=Ovis aries OX=9940 GN=BAG6 PE=4 SV=1	BAG6	0.311782	0.777703
SDS3 homolog, SIN3A corepressor complex component OS=Ovis aries OX=9940 GN=SUDS3 PE=4 SV=1	SUDS3	0.311724	1.42848
Collectin-12 OS=Ovis aries OX=9940 GN=COLEC12 PE=4 SV=1	COLEC12	0.309789	3.44276
Histone H2B OS=Ovis aries OX=9940 PE=3 SV=1		0.307735	1.32652
Uncharacterized protein OS=Ovis aries OX=9940 GN=LOC114116854 PE=4 SV=1	LOC114116854	0.30766	1.1555
Uncharacterized protein OS=Ovis aries OX=9940 GN=MYH7 PE=3 SV=1	MYH7	0.307526	0.263679
Calponin-1 OS=Ovis aries OX=9940 GN=CNN1 PE=2 SV=1	CNN1	0.307186	1.74617
Fibromodulin OS=Ovis aries OX=9940 GN=FMOD PE=3 SV=1	FMOD	0.305258	0.611452
Late endosomal/lysosomal adaptor and MAPK and MTOR activator 3 OS=Ovis aries OX=9940 GN=LAMTOR3 PE=3 SV=1	LAMTOR3	0.303484	1.6049
Uncharacterized protein OS=Ovis aries OX=9940 GN=SORBS2 PE=4 SV=1	SORBS2	0.301474	2.52935
Apolipoprotein A1 OS=Ovis aries OX=9940 GN=APOA1 PE=3 SV=1	APOA1	0.300831	0.8378
Paralemmin OS=Ovis aries OX=9940 GN=PALM PE=3 SV=1	PALM	0.300252	1.7993
Interleukin 1 receptor type 2 OS=Ovis aries OX=9940 GN=IL1R2 PE=4 SV=1	IL1R2	0.299561	0.496836
MAGUK p55 subfamily member 7 OS=Ovis aries OX=9940 PE=3 SV=1	MPP7	0.299274	1.2902
Telomeric repeat-binding factor OS=Ovis aries OX=9940 GN=TERF2 PE=4 SV=1	TERF2	0.299237	2.34761
Uncharacterized protein OS=Ovis aries OX=9940 GN=ADAM9 PE=4 SV=1	ADAM9	0.298164	1.57849
Filamin C OS=Ovis aries OX=9940 GN=FLNC PE=3 SV=1	FLNC	0.294144	2.8974
Procollagen-lysine 5-dioxygenase OS=Ovis aries OX=9940 GN=PLOD1 PE=4 SV=1	PLOD1	0.293946	1.24579
Sulfite oxidase OS=Ovis aries OX=9940 GN=SUOX PE=4 SV=1	SUOX	0.293757	0.759587
Uncharacterized protein OS=Ovis aries OX=9940 GN=LMNB1 PE=3 SV=1	LMNB1	0.291882	2.5443
Phosphoglycerate mutase OS=Ovis aries OX=9940 GN=PGAM2 PE=3 SV=1	PGAM2	0.291541	0.595094
2'-5' oligoadenylate synthase OS=Ovis aries OX=9940 PE=3 SV=1		0.291506	3.47059
Bromodomain containing 8 OS=Ovis aries OX=9940 GN=BRD8 PE=4 SV=1	BRD8	0.291147	2.65972
UBX domain-containing protein 7 OS=Ovis aries OX=9940 GN=UBXN7 PE=4 SV=1	UBXN7	0.290014	2.29557
H15 domain-containing protein OS=Ovis aries OX=9940 PE=3 SV=1		0.28897	1.62598
Calsequestrin OS=Ovis aries OX=9940 GN=CASQ2 PE=3 SV=1	CASQ2	0.286212	0.278015
Apolipoprotein E OS=Ovis aries musimon OX=9938 GN=APOE PE=3 SV=1	APOE	0.285599	4.03457
Selenoprotein S OS=Ovis aries OX=9940 PE=3 SV=1		0.28462	1.86601
Protein C, inactivator of coagulation factors Va and VIIIa OS=Ovis aries OX=9940 GN=PROC PE=4 SV=1	PROC	0.281936	0.935077
Protein phosphatase 4 regulatory subunit 1 OS=Ovis aries OX=9940 GN=PPP4R1 PE=4 SV=1	PPP4R1	0.281918	0.546152
Histone H2A OS=Ovis aries OX=9940 GN=H2AC21 PE=3 SV=1	H2AC21	0.281452	1.16687
Axonal membrane protein GAP-43 OS=Ovis aries OX=9940 GN=GAP43 PE=3 SV=1	GAP43	0.281439	0.936403
B-TFIID TATA-box binding protein associated factor 1 OS=Ovis aries OX=9940 GN=BTAF1 PE=4 SV=1	BTAF1	0.280889	1.94403
SRA1 domain-containing protein OS=Ovis aries OX=9940 GN=SRA1 PE=4 SV=1	SRA1	0.280517	1.03019
Xin actin binding repeat containing 2 OS=Ovis aries OX=9940 GN=XIRP2 PE=3 SV=1	XIRP2	0.280055	1.22298
RAS p21 protein activator 2 OS=Ovis aries OX=9940 GN=RASA2 PE=4 SV=1	RASA2	0.279612	2.04213
Uncharacterized protein OS=Ovis aries OX=9940 GN=C1S PE=4 SV=1	C1S	0.27915	2.96341
Uncharacterized protein OS=Ovis aries OX=9940 GN=LAMB1 PE=4 SV=1	LAMB1	0.2777	3.76007
Neurofilament light OS=Ovis aries OX=9940 GN=NEFL PE=3 SV=1	NEFL	0.276432	1.20274
Serum amyloid A protein OS=Ovis aries OX=9940 PE=3 SV=1		0.275271	1.26977
Polypeptide N-acetylgalactosaminyltransferase OS=Ovis aries OX=9940 GN=GALNT7 PE=3 SV=1	GALNT7	0.274608	0.848528
Histone H3 OS=Ovis aries OX=9940 PE=3 SV=1		0.273478	1.00102
Transglutaminase 7 OS=Ovis aries OX=9940 GN=TGM7 PE=3 SV=1	TGM7	0.273411	1.70559
BH3-interacting domain death agonist OS=Ovis aries OX=9940 PE=4 SV=1		0.271846	2.98486
Dipeptidase OS=Ovis aries OX=9940 GN=DPEP1 PE=3 SV=1	DPEP1	0.271423	1.65142
SET binding factor 2 OS=Ovis aries OX=9940 GN=SBF2 PE=3 SV=1	SBF2	0.270752	0.500947
ANK_REP_REGION domain-containing protein OS=Ovis aries OX=9940 PE=4 SV=1	LOC106991750	0.267748	0.455165
Uncharacterized protein OS=Ovis aries OX=9940 GN=AFP PE=4 SV=1	AFP	0.266834	1.96027
H15 domain-containing protein OS=Ovis aries OX=9940 GN=H1-0 PE=3 SV=1	H1-0	0.266382	1.32646
Adenylosuccinate synthetase OS=Ovis aries OX=9940 GN=ADSS1 PE=3 SV=1	ADSS1	0.265832	1.60105
Matrix metalloproteinase-14 OS=Ovis aries OX=9940 GN=MMP14 PE=2 SV=1	MMP14	0.265651	2.41072
PITH domain-containing protein OS=Ovis aries OX=9940 PE=4 SV=1	PITHD1	0.2654	0.553412
PlsC domain-containing protein OS=Ovis aries OX=9940 GN=LPGAT1 PE=3 SV=1	LPGAT1	0.263893	1.12138
EMAP like 1 OS=Ovis aries OX=9940 GN=EML1 PE=3 SV=1	EML1	0.263783	2.3411
Histone H4 OS=Ovis aries OX=9940 PE=3 SV=1		0.262036	1.24856
Latent transforming growth factor beta binding protein 2 OS=Ovis aries OX=9940 GN=LTBP2 PE=4 SV=1	LTBP2	0.261717	1.71126
Prefoldin subunit 4 OS=Ovis aries OX=9940 GN=LOC101112255 PE=3 SV=1	LOC101112255	0.261533	0.971607
Lysyl oxidase homolog OS=Ovis aries OX=9940 GN=LOX PE=3 SV=1	LOX	0.260281	3.43059
Tetratricopeptide repeat, ankyrin repeat and coiled-coil containing 1 OS=Ovis aries OX=9940 GN=TANC1 PE=4 SV=1	TANC1	0.260105	0.893081
Ribosome binding protein 1 OS=Ovis aries OX=9940 GN=RRBP1 PE=4 SV=1	RRBP1	0.257572	1.24831
Transglutaminase 2 OS=Ovis aries OX=9940 GN=TGM2 PE=3 SV=1	TGM2	0.257231	1.97003
Mitochondrial fission factor OS=Ovis aries OX=9940 GN=MFF PE=3 SV=1	MFF	0.254436	0.501039
Ribosomal protein L15 OS=Ovis aries OX=9940 GN=RPL15 PE=3 SV=1	RPL15	0.254308	1.70247
Procollagen-proline 3-dioxygenase OS=Ovis aries OX=9940 GN=P3H1 PE=3 SV=1	P3H1	0.253453	1.22199
Creatine kinase (Fragment) OS=Ovis aries OX=9940 PE=2 SV=1	CKB	0.252418	2.09722
Splicing factor 3a subunit 1 OS=Ovis aries OX=9940 GN=SF3A1 PE=4 SV=1	SF3A1	0.252328	2.45601
Proline rich coiled-coil 2B OS=Ovis aries OX=9940 GN=PRRC2B PE=4 SV=1	PRRC2B	0.252215	1.59522
E3 ubiquitin-protein ligase RNF170 OS=Ovis aries OX=9940 GN=RNF170 PE=4 SV=1	RNF170	0.251616	0.287956
Uncharacterized protein OS=Ovis aries OX=9940 PE=4 SV=1		0.249971	1.52268
Protein disulfide isomerase family A member 5 OS=Ovis aries OX=9940 GN=PDIA5 PE=2 SV=1	PDIA5	0.249494	2.95206
Uncharacterized protein OS=Ovis aries OX=9940 GN=GID8 PE=4 SV=1	GID8	0.248909	2.06387
14 kDa phosphohistidine phosphatase OS=Ovis aries OX=9940 PE=3 SV=1		0.247912	1.36408
TLC domain-containing protein OS=Ovis aries OX=9940 GN=TLCD2 PE=4 SV=1	TLCD2	0.246922	0.803298
Cathepsin K OS=Ovis aries OX=9940 GN=CTSK PE=3 SV=1	CTSK	0.246802	2.47215
CMP-N-acetylneuraminic acid synthase OS=Ovis aries OX=9940 GN=CMAS PE=3 SV=1	CMAS	0.246209	2.19531
Cytochrome b-c1 complex subunit 6 OS=Ovis aries OX=9940 GN=UQCRH PE=1 SV=1	UQCRH	0.246076	0.732808
Signal sequence receptor subunit gamma OS=Ovis aries OX=9940 GN=SSR3 PE=3 SV=1	SSR3	0.244659	1.21008
Uncharacterized protein OS=Ovis aries OX=9940 GN=LOC101109899 PE=4 SV=1	LOC101109899	0.243645	1.9618
Disco interacting protein 2 homolog C OS=Ovis aries OX=9940 GN=DIP2C PE=3 SV=1	DIP2C	0.243376	0.641286
Dehydrogenase/reductase 12 OS=Ovis aries OX=9940 GN=DHRS12 PE=4 SV=1	DHRS12	0.24204	2.24404
Calsequestrin OS=Ovis aries OX=9940 GN=CASQ1 PE=3 SV=1	CASQ1	0.24009	0.377631
Uncharacterized protein OS=Ovis aries OX=9940 GN=MOGS PE=3 SV=1	MOGS	0.239348	1.14865
SOSS complex subunit C OS=Ovis aries OX=9940 GN=INIP PE=3 SV=1	INIP	0.239096	0.870939
Ubiquitinyl hydrolase 1 OS=Ovis aries OX=9940 GN=USP48 PE=3 SV=1	USP48	0.238659	2.5055
Interferon regulatory factor 2 binding protein like OS=Ovis aries OX=9940 GN=IRF2BPL PE=3 SV=1	IRF2BPL	0.238263	1.22507
Uncharacterized protein OS=Ovis aries OX=9940 GN=TMEM254 PE=4 SV=1	TMEM254	0.23763	2.39841
Stathmin OS=Ovis aries OX=9940 GN=STMN1 PE=3 SV=1	STMN1	0.237067	0.688774
AP-2 transcription factor OS=Ovis aries OX=9940 GN=TFAP2A PE=3 SV=1	TFAP2A	0.236788	0.669239
Integrin beta OS=Ovis aries OX=9940 GN=ITGB2 PE=3 SV=1	ITGB2	0.235864	0.307303
COP9 constitutive photomorphogenic subunit 7B protein-like protein OS=Ovis aries OX=9940 GN=COPS7B PE=2 SV=1	COPS7B	0.235722	1.93561
Multidrug resistance protein 1 OS=Ovis aries OX=9940 GN=abcb1 PE=2 SV=1	abcb1	0.235684	0.914089
Troponin I type 1 variant X1 OS=Ovis aries OX=9940 GN=TNNI1 PE=2 SV=1	TNNI1	0.234957	0.3271
Cysteine and glycine rich protein 1 OS=Ovis aries OX=9940 GN=CSRP1 PE=4 SV=1	CSRP1	0.23457	2.23816
Calponin-homology (CH) domain-containing protein OS=Ovis aries OX=9940 PE=4 SV=1		0.23403	3.34774
Uncharacterized protein OS=Ovis aries OX=9940 GN=DYSF PE=3 SV=1	DYSF	0.233732	1.16587
Insulin-like growth factor-binding protein-7 OS=Ovis aries OX=9940 GN=IGFBP-7 PE=2 SV=1	IGFBP-7	0.233487	2.65542
High mobility group nucleosome binding domain 5 OS=Ovis aries OX=9940 GN=HMGN5 PE=3 SV=1	HMGN5	0.232401	2.00362
Aldo_ket_red domain-containing protein OS=Ovis aries OX=9940 GN=LOC106990122 PE=3 SV=1	LOC106990122	0.231506	0.934149
Uncharacterized protein OS=Ovis aries OX=9940 GN=IGF2BP3 PE=3 SV=1	IGF2BP3	0.231449	1.62634
Uncharacterized protein OS=Ovis aries OX=9940 GN=HSD17B11 PE=3 SV=1	HSD17B11	0.230436	1.80543
Myosin light chain 2 OS=Ovis aries OX=9940 GN=MYL2 PE=2 SV=1	MYL2	0.230433	0.193972
RNA binding motif protein 15 OS=Ovis aries OX=9940 GN=RBM15 PE=3 SV=1	RBM15	0.226699	1.99919
Vacuolar protein sorting-associated protein 51 homolog OS=Ovis aries OX=9940 GN=VPS51 PE=3 SV=1	VPS51	0.226567	1.0136
Phospholemman OS=Ovis aries OX=9940 GN=FXYD1 PE=3 SV=1	FXYD1	0.225769	1.41412
H1.3 linker histone, cluster member OS=Ovis aries OX=9940 GN=H1-3 PE=3 SV=1	H1-3	0.22423	1.18639
Histone H2A OS=Ovis aries OX=9940 GN=H2AC20 PE=3 SV=1	H2AC20	0.223158	1.20172
Uncharacterized protein OS=Ovis aries OX=9940 PE=3 SV=1		0.223059	2.20756
Collagen-binding protein OS=Ovis aries OX=9940 GN=SERPINH1 PE=2 SV=1	SERPINH1	0.222464	1.31743
SEC61 translocon alpha 1 subunit OS=Ovis aries OX=9940 GN=SEC61A1 PE=3 SV=1	SEC61A1	0.222271	2.77319
Angiopoietin like 2 OS=Ovis aries OX=9940 GN=ANGPTL2 PE=4 SV=1	ANGPTL2	0.221572	1.89651
RUN and FYVE domain containing 2 OS=Ovis aries OX=9940 GN=RUFY2 PE=4 SV=1	RUFY2	0.221003	3.38985
Glycogen phosphorylase, muscle form OS=Ovis aries OX=9940 GN=PYGM PE=2 SV=3	PYGM	0.2207	0.475741
Caveolae associated protein 3 OS=Ovis aries OX=9940 GN=CAVIN3 PE=3 SV=1	CAVIN3	0.220443	1.72197
RNA-binding protein with serine-rich domain 1 OS=Ovis aries OX=9940 GN=RNPS1 PE=3 SV=1	RNPS1	0.218615	1.99527
Metalloproteinase inhibitor 2 OS=Ovis aries OX=9940 GN=TIMP2 PE=2 SV=1	TIMP2	0.218243	1.78423
Junction mediating and regulatory protein, p53 cofactor OS=Ovis aries OX=9940 GN=JMY PE=4 SV=1	JMY	0.217751	1.3367
Myomesin 1 OS=Ovis aries OX=9940 GN=MYOM1 PE=4 SV=1	MYOM1	0.21705	0.319349
Phosphofurin acidic cluster sorting protein 1 OS=Ovis aries OX=9940 GN=PACS1 PE=3 SV=1	PACS1	0.21586	1.80858
Ubiquitinyl hydrolase 1 OS=Ovis aries OX=9940 GN=VCPIP1 PE=4 SV=1	VCPIP1	0.215409	0.596738
Cardiac phospholamban OS=Ovis aries OX=9940 GN=PLN PE=3 SV=1	PLN	0.214962	0.789465
Tudor domain-containing protein OS=Ovis aries OX=9940 PE=4 SV=1		0.214565	0.834217
Transgelin OS=Ovis aries OX=9940 GN=TAGLN PE=3 SV=1	TAGLN	0.21447	2.00677
Uncharacterized protein OS=Ovis aries OX=9940 GN=CCDC137 PE=4 SV=1	CCDC137	0.213796	0.6766
Uncharacterized protein OS=Ovis aries OX=9940 GN=RPL22L1 PE=3 SV=1	RPL22L1	0.211465	2.0705
Procollagen-lysine 5-dioxygenase OS=Ovis aries OX=9940 GN=PLOD3 PE=4 SV=1	PLOD3	0.211127	0.778848
BRO1 domain- and CAAX motif-containing protein OS=Ovis aries OX=9940 GN=BROX PE=3 SV=1	BROX	0.210874	1.03727
Arachidonate 15-lipoxygenase type B OS=Ovis aries OX=9940 GN=ALOX15B PE=3 SV=1	ALOX15B	0.210841	1.10069
Peptidase A1 domain-containing protein OS=Ovis aries OX=9940 PE=3 SV=1		0.208451	1.51987
Protein RER1 OS=Ovis aries OX=9940 GN=RER1 PE=3 SV=1	RER1	0.207525	2.14509
TRPM8 channel associated factor 1 OS=Ovis aries OX=9940 GN=TCAF1 PE=3 SV=1	TCAF1	0.207399	0.480245
Pyrroline-5-carboxylate reductase OS=Ovis aries OX=9940 GN=PYCR1 PE=3 SV=1	PYCR1	0.207383	1.27183
Bis(5'-adenosyl)-triphosphatase OS=Ovis aries OX=9940 GN=FHIT PE=2 SV=1	FHIT	0.207348	1.37531
Protein BUD31 homolog OS=Ovis aries OX=9940 PE=3 SV=1		0.207048	0.678277
Uncharacterized protein OS=Ovis aries OX=9940 GN=AFM PE=4 SV=1	AFM	0.206525	0.99455
Ipi1_N domain-containing protein OS=Ovis aries OX=9940 GN=TEX10 PE=3 SV=1	TEX10	0.206027	1.54048
Replication stress response regulator SDE2 OS=Ovis aries OX=9940 GN=SDE2 PE=3 SV=1	SDE2	0.205881	3.73689
Histone H2A OS=Ovis aries OX=9940 GN=LOC101112856 PE=3 SV=1	LOC101112856	0.205571	0.640095
Ubiquitinyl hydrolase 1 OS=Ovis aries OX=9940 GN=OTUD7B PE=4 SV=1	OTUD7B	0.203537	0.702279
AB hydrolase-1 domain-containing protein OS=Ovis aries OX=9940 GN=ABHD10 PE=4 SV=1	ABHD10	0.203146	2.07367
PHD finger protein 10 OS=Ovis aries OX=9940 GN=PHF10 PE=3 SV=1	PHF10	0.202346	0.628277
Oligosaccharyltransferase complex subunit OS=Ovis aries OX=9940 GN=OSTC PE=3 SV=1	OSTC	0.202331	1.57184
VIR_N domain-containing protein OS=Ovis aries OX=9940 GN=VIRMA PE=3 SV=1	VIRMA	0.201962	0.57314
Uncharacterized protein OS=Ovis aries OX=9940 GN=PCDHGC3 PE=4 SV=1	PCDHGC3	0.201655	0.630995
5'-nucleotidase domain containing 2 OS=Ovis aries OX=9940 GN=NT5DC2 PE=3 SV=1	NT5DC2	0.201634	1.1742
Adaptin_N domain-containing protein OS=Ovis aries OX=9940 PE=4 SV=1	LOC106992042; LOC106992043	0.201417	1.96293
Monocarboxylate transporter 1 OS=Ovis aries OX=9940 GN=SLC16A1 PE=3 SV=1	SLC16A1	0.200895	2.07229
Calcium uniporter protein OS=Ovis aries OX=9940 GN=MCU PE=3 SV=1	MCU	0.200511	2.83852
Mortality factor 4-like protein 2 OS=Ovis aries OX=9940 GN=MORF4L2 PE=4 SV=1	MORF4L2	0.199917	0.404478
Uncharacterized protein OS=Ovis aries OX=9940 GN=CDK5RAP3 PE=3 SV=1	CDK5RAP3	0.199748	0.285994
Uncharacterized protein OS=Ovis aries OX=9940 GN=APH1A PE=3 SV=1	APH1A	0.19954	0.893447
GOLD domain-containing protein OS=Ovis aries OX=9940 GN=TMED3 PE=3 SV=1	TMED3	0.199342	4.81698
Protein disulfide-isomerase OS=Ovis aries OX=9940 GN=P4HB PE=3 SV=1	P4HB	0.199152	1.12191
Somatomedin B and thrombospondin type 1 domain containing OS=Ovis aries OX=9940 GN=SBSPON PE=4 SV=1	SBSPON	0.199146	2.063
Uncharacterized protein OS=Ovis aries OX=9940 PE=3 SV=1		0.198582	1.91442
Mitochondrial nucleoid factor 1 OS=Ovis aries OX=9940 GN=UQCC2 PE=4 SV=1	UQCC2	0.198554	0.912468
Importin N-terminal domain-containing protein OS=Ovis aries OX=9940 GN=IPO11 PE=4 SV=1	IPO11	0.19782	0.846193
Phosphodiesterase 12 OS=Ovis aries OX=9940 GN=PDE12 PE=4 SV=1	PDE12	0.197774	1.01105
Uncharacterized protein OS=Ovis aries OX=9940 PE=3 SV=1		0.1968	2.53198
CDP-diacylglycerol--inositol 3-phosphatidyltransferase OS=Ovis aries OX=9940 GN=CDIPT PE=3 SV=1	CDIPT	0.196787	2.28331
Gamma-synuclein OS=Ovis aries OX=9940 GN=SNCG PE=3 SV=1	SNCG	0.196618	1.38019
ANK_REP_REGION domain-containing protein OS=Ovis aries OX=9940 PE=4 SV=1		0.196305	2.28795
Uncharacterized protein OS=Ovis aries OX=9940 PE=4 SV=1	LOC101123427; IVL	0.194212	1.112
Plakophilin 2 OS=Ovis aries OX=9940 GN=PKP2 PE=3 SV=1	PKP2	0.194183	3.34436
Myotrophin OS=Ovis aries OX=9940 GN=MTPN PE=4 SV=1	MTPN	0.194129	0.671759
IF rod domain-containing protein OS=Ovis aries OX=9940 PE=3 SV=1		0.193941	0.567877
Calcium-transporting ATPase OS=Ovis aries OX=9940 GN=ATP2A2 PE=3 SV=1	ATP2A2	0.192723	1.51034
Zinc finger CCCH-type containing 18 OS=Ovis aries OX=9940 GN=ZC3H18 PE=4 SV=1	ZC3H18	0.192383	1.90856
Bms1-type G domain-containing protein OS=Ovis aries OX=9940 GN=TSR1 PE=4 SV=1	TSR1	0.191888	1.50264
MPN domain-containing protein OS=Ovis aries OX=9940 GN=EMC8 PE=3 SV=1	EMC8	0.190886	2.79881
Phosphatidylinositol-3,4-bisphosphate 4-phosphatase OS=Ovis aries OX=9940 GN=INPP4A PE=3 SV=1	INPP4A	0.190309	2.55408
LisH domain-containing protein OS=Ovis aries OX=9940 GN=NOLC1 PE=4 SV=1	NOLC1	0.189877	2.36463
HMA domain-containing protein OS=Ovis aries OX=9940 GN=CCS PE=4 SV=1	CCS	0.189621	1.43919
Apolipoprotein H OS=Ovis aries OX=9940 GN=APOH PE=4 SV=1	APOH	0.1889	1.65552
IF rod domain-containing protein OS=Ovis aries OX=9940 GN=KRT73 PE=3 SV=1	KRT73	0.186835	1.56189
Glutaminase OS=Ovis aries OX=9940 GN=GLS PE=3 SV=1	GLS	0.186713	0.723429
Transforming acidic coiled-coil containing protein 1 OS=Ovis aries OX=9940 GN=TACC1 PE=3 SV=1	TACC1	0.185191	1.31392
Mitochondrial ribosomal protein L12 OS=Ovis aries OX=9940 GN=MRPL12 PE=3 SV=1	MRPL12	0.184417	1.17248
Caveolae associated protein 1 OS=Ovis aries OX=9940 GN=CAVIN1 PE=3 SV=1	CAVIN1	0.184212	0.859096
Phosphatidylinositol 3-kinase catalytic subunit type 3 OS=Ovis aries OX=9940 GN=PIK3C3 PE=3 SV=1	PIK3C3	0.183743	1.36559
Cytochrome b5 type B OS=Ovis aries OX=9940 GN=CYB5B PE=3 SV=1	CYB5B	0.183482	1.17697
Thioredoxin domain containing 5 OS=Ovis aries OX=9940 GN=TXNDC5 PE=4 SV=1	TXNDC5	0.183299	1.92316
Insulin like growth factor 2 receptor OS=Ovis aries OX=9940 GN=IGF2R PE=4 SV=1	IGF2R	0.18271	1.63524
H15 domain-containing protein OS=Ovis aries OX=9940 GN=H1-10 PE=3 SV=1	H1-10	0.182452	1.19645
Prothymosin alpha OS=Ovis aries OX=9940 GN=PTMA PE=3 SV=1	PTMA	0.182346	0.753625
Uncharacterized protein OS=Ovis aries OX=9940 GN=FHL1 PE=4 SV=1	FHL1	0.18215	1.8944
Bridging integrator 1 OS=Ovis aries OX=9940 GN=BIN1 PE=4 SV=1	BIN1	0.181814	1.10361
Ribosomal RNA processing 12 homolog OS=Ovis aries OX=9940 GN=RRP12 PE=3 SV=1	RRP12	0.181528	1.98427
PALM2 and AKAP2 fusion OS=Ovis aries OX=9940 GN=PALM2AKAP2 PE=3 SV=1	PALM2AKAP2	0.181289	1.55495
Uncharacterized protein OS=Ovis aries OX=9940 GN=TMOD1 PE=4 SV=1	TMOD1	0.180651	1.85581
Matrilin 2 OS=Ovis aries OX=9940 GN=MATN2 PE=4 SV=1	MATN2	0.180491	1.31173
Cytochrome c1 OS=Ovis aries OX=9940 GN=CYC1 PE=1 SV=1	CYC1	0.180375	2.56671
RNA exonuclease 2 OS=Ovis aries OX=9940 GN=REXO2 PE=3 SV=1	REXO2	0.179933	1.00405
Rho guanine nucleotide exchange factor 1 OS=Ovis aries OX=9940 GN=ARHGEF1 PE=4 SV=1	ARHGEF1	0.179784	1.95864
Inactive phosphatidylinositol 3-phosphatase 12 OS=Ovis aries OX=9940 GN=MTMR12 PE=3 SV=1	MTMR12	0.17923	0.189062
Uncharacterized protein OS=Ovis aries OX=9940 GN=CKAP4 PE=4 SV=1	CKAP4	0.178465	1.57357
Tetraspanin OS=Ovis aries OX=9940 GN=CD81 PE=3 SV=1	CD81	0.177293	1.91224
Uncharacterized protein OS=Ovis aries OX=9940 PE=4 SV=1		0.177285	1.85098
J domain-containing protein OS=Ovis aries OX=9940 GN=DNAJB11 PE=4 SV=1	DNAJB11	0.177271	1.44814
BRCA1-A complex subunit BRE OS=Ovis aries OX=9940 GN=BABAM2 PE=4 SV=1	BABAM2	0.176845	1.76262
Golgi membrane protein 2 OS=Ovis aries OX=9940 GN=CASC4 PE=3 SV=1	CASC4	0.176767	0.914854
SH3 domain containing 19 OS=Ovis aries OX=9940 GN=SH3D19 PE=4 SV=1	SH3D19	0.176322	1.22463
Apolipoprotein C-III OS=Ovis aries OX=9940 GN=APOC3 PE=3 SV=1	APOC3	0.175498	2.25355
2-methoxy-6-polyprenyl-1,4-benzoquinol methylase, mitochondrial OS=Ovis aries OX=9940 GN=COQ5 PE=3 SV=1	COQ5	0.174479	1.71305
MICAL like 1 OS=Ovis aries OX=9940 GN=MICALL1 PE=4 SV=1	MICALL1	0.17428	0.805001
Osteonectin OS=Ovis aries OX=9940 GN=SPARC PE=2 SV=1	SPARC	0.174214	1.34842
Low density lipoprotein receptor adaptor protein 1 OS=Ovis aries OX=9940 GN=LDLRAP1 PE=4 SV=1	LDLRAP1	0.173652	1.47294
Glutamine--fructose-6-phosphate transaminase (isomerizing) OS=Ovis aries OX=9940 GN=GFPT1 PE=4 SV=1	GFPT1	0.173632	1.53498
Uncharacterized protein OS=Ovis aries OX=9940 GN=MRPL55 PE=4 SV=1	MRPL55	0.173541	0.402059
Uncharacterized protein OS=Ovis aries OX=9940 GN=SNRPB2 PE=4 SV=1	SNRPB2	0.173036	1.98747
Troponin C type 1 OS=Ovis aries OX=9940 GN=TNNC1 PE=2 SV=1	TNNC1	0.17291	0.118153
Mimecan OS=Ovis aries OX=9940 GN=OGN PE=3 SV=1	OGN	0.172365	0.70455
Integrin-linked protein kinase OS=Ovis aries OX=9940 GN=ILK PE=2 SV=1	ILK	0.17183	2.20888
Zinc finger CCCH-type containing, antiviral 1 like OS=Ovis aries OX=9940 GN=ZC3HAV1L PE=4 SV=1	ZC3HAV1L	0.17163	1.9824
Uncharacterized protein OS=Ovis aries OX=9940 GN=PFDN5 PE=3 SV=1	PFDN5	0.171509	1.44325
Uncharacterized protein OS=Ovis aries OX=9940 GN=CTSF PE=3 SV=1	CTSF	0.171394	0.566714
ATP synthase subunit alpha OS=Ovis aries OX=9940 GN=ATP5F1A PE=3 SV=1	ATP5F1A	0.171069	1.62566
t-SNARE coiled-coil homology domain-containing protein OS=Ovis aries OX=9940 GN=STX7 PE=3 SV=1	STX7	0.170973	2.56959
Tr-type G domain-containing protein OS=Ovis aries OX=9940 PE=3 SV=1		0.170967	1.09436
Septin 8 OS=Ovis aries OX=9940 GN=SEPTIN8 PE=3 SV=1	SEPTIN8	0.170816	1.27518
SCD domain-containing protein OS=Ovis aries OX=9940 GN=STAG1 PE=3 SV=1	STAG1	0.170733	1.77842
Uncharacterized protein OS=Ovis aries OX=9940 GN=FMC1-LUC7L2 PE=3 SV=1	FMC1-LUC7L2	0.170374	2.12965
Isoleucyl-tRNA synthetase OS=Ovis aries OX=9940 GN=IARS1 PE=3 SV=1	IARS1	0.169834	0.942907
High density lipoprotein binding protein OS=Ovis aries OX=9940 GN=HDLBP PE=4 SV=1	HDLBP	0.168989	1.55633
Uncharacterized protein OS=Ovis aries OX=9940 GN=PHIP PE=4 SV=1	PHIP	0.168973	0.844793
Transmembrane 9 superfamily member OS=Ovis aries OX=9940 GN=TM9SF4 PE=3 SV=1	TM9SF4	0.168932	1.89906
Exportin 4 OS=Ovis aries OX=9940 GN=XPO4 PE=4 SV=1	XPO4	0.168241	2.00528
EH domain containing 2 OS=Ovis aries OX=9940 GN=EHD2 PE=4 SV=1	EHD2	0.167879	1.38306
LEM domain containing 3 OS=Ovis aries OX=9940 GN=LEMD3 PE=4 SV=1	LEMD3	0.167871	1.61074
Ankyrin repeat domain 16 OS=Ovis aries OX=9940 GN=ANKRD16 PE=4 SV=1	ANKRD16	0.167555	1.32531
Ral guanine nucleotide dissociation stimulator like 2 OS=Ovis aries OX=9940 GN=RGL2 PE=4 SV=1	RGL2	0.167258	2.60622
Ras homolog family member B OS=Ovis aries OX=9940 GN=RHOB PE=4 SV=1	RHOB	0.167117	1.21066
Aldo_ket_red domain-containing protein OS=Ovis aries OX=9940 GN=AKR1B1 PE=3 SV=1	AKR1B1	0.166906	1.46585
Methylcrotonoyl-CoA carboxylase 1 OS=Ovis aries OX=9940 GN=MCCC1 PE=4 SV=1	MCCC1	0.166457	1.20735
Activated RNA polymerase II transcriptional coactivator p15 OS=Ovis aries OX=9940 GN=SUB1 PE=3 SV=1	SUB1	0.165839	1.62193
SHC-transforming protein 1 OS=Ovis aries OX=9940 GN=SHC1 PE=4 SV=1	SHC1	0.165814	0.734248
Peroxin-14 OS=Ovis aries OX=9940 GN=PEX14 PE=3 SV=1	PEX14	0.165636	2.09055
Uncharacterized protein OS=Ovis aries OX=9940 GN=FAM25A PE=3 SV=1	FAM25A	0.165594	0.685237
Uncharacterized protein OS=Ovis aries OX=9940 GN=GRSF1 PE=4 SV=1	GRSF1	0.164775	1.08679
Notch2 OS=Ovis aries OX=9940 GN=Notch2 PE=2 SV=1	Notch2	0.164351	1.50285
Uncharacterized protein OS=Ovis aries OX=9940 GN=EMG1 PE=3 SV=1	EMG1	0.164317	1.76551
Folate gamma-glutamyl hydrolase OS=Ovis aries OX=9940 GN=GGH PE=3 SV=1	GGH	0.164299	1.08412
Thymidylate synthase OS=Ovis aries OX=9940 GN=TYMS PE=3 SV=1	TYMS	0.163977	2.58516
Sin3A associated protein 130 OS=Ovis aries OX=9940 GN=SAP130 PE=3 SV=1	SAP130	0.163821	0.425636
Uncharacterized protein OS=Ovis aries OX=9940 PE=3 SV=1	LOC101122692	0.163636	1.1856
Robl_LC7 domain-containing protein OS=Ovis aries OX=9940 GN=LAMTOR2 PE=3 SV=1	LAMTOR2	0.163488	0.871579
Endoplasmic reticulum resident protein 29 OS=Ovis aries OX=9940 GN=ERP29 PE=4 SV=1	ERP29	0.163251	1.34442
60S ribosomal protein L13 OS=Ovis aries OX=9940 PE=3 SV=1		0.162792	1.29489
Calcium binding and coiled-coil domain 1 OS=Ovis aries OX=9940 GN=CALCOCO1 PE=4 SV=1	CALCOCO1	0.162781	1.67979
PKS_ER domain-containing protein OS=Ovis aries OX=9940 PE=3 SV=1	LOC101122865	0.162407	1.06032
Transcription initiation factor IIF subunit alpha OS=Ovis aries OX=9940 GN=GTF2F1 PE=3 SV=1	GTF2F1	0.162006	0.652173
RAB35, member RAS oncogene family OS=Ovis aries OX=9940 GN=RAB35 PE=4 SV=1	RAB35	0.161726	1.98599
BCL2 associated athanogene 2 OS=Ovis aries OX=9940 GN=BAG2 PE=4 SV=1	BAG2	0.161694	1.6834
Caveolin OS=Ovis aries OX=9940 GN=CAV1 PE=3 SV=1	CAV1	0.161654	0.804712
Fatty acid 2-hydroxylase OS=Ovis aries OX=9940 GN=FA2H PE=3 SV=1	FA2H	0.161208	1.47429
Anamorsin OS=Ovis aries OX=9940 GN=CIAPIN1 PE=3 SV=1	CIAPIN1	0.161147	0.668112
Uncharacterized protein OS=Ovis aries OX=9940 GN=RBM26 PE=4 SV=1	RBM26	0.160731	2.09079
Nuclear casein kinase and cyclin dependent kinase substrate 1 OS=Ovis aries OX=9940 GN=NUCKS1 PE=4 SV=1	NUCKS1	0.16062	0.416791
Guanine nucleotide-binding protein subunit gamma OS=Ovis aries OX=9940 GN=GNG5 PE=3 SV=1	GNG5	0.160559	1.19743
CBF domain-containing protein OS=Ovis aries OX=9940 GN=CEBPZ PE=3 SV=1	CEBPZ	0.160204	0.775816
Leucine zipper tumor suppressor 2 OS=Ovis aries OX=9940 GN=LZTS2 PE=4 SV=1	LZTS2	0.160163	0.635669
Argininosuccinate synthase OS=Ovis aries OX=9940 GN=ASS1 PE=3 SV=1	ASS1	0.160155	0.688199
Family with sequence similarity 83 member C OS=Ovis aries OX=9940 GN=FAM83C PE=3 SV=1	FAM83C	0.160099	0.28435
Uncharacterized protein OS=Ovis aries OX=9940 GN=EXOSC7 PE=4 SV=1	EXOSC7	0.159426	1.08013
Heterogeneous nuclear ribonucleoprotein L like OS=Ovis aries OX=9940 GN=HNRNPLL PE=4 SV=1	HNRNPLL	0.158357	0.722891
5'-nucleotidase, cytosolic II OS=Ovis aries OX=9940 GN=NT5C2 PE=3 SV=1	NT5C2	0.158186	2.25149
WD_REPEATS_REGION domain-containing protein OS=Ovis aries OX=9940 GN=WDR3 PE=4 SV=1	WDR3	0.15814	0.538015
ZZ-type domain-containing protein OS=Ovis aries OX=9940 GN=DMD PE=4 SV=1	DMD	0.157879	3.69525
H1.2 linker histone, cluster member OS=Ovis aries OX=9940 GN=H1-2 PE=3 SV=1	H1-2	0.157759	0.606643
pre-rRNA processing protein FTSJ3 OS=Ovis aries OX=9940 GN=FTSJ3 PE=3 SV=1	FTSJ3	0.157711	1.03008
DNA-directed RNA polymerase subunit OS=Ovis aries OX=9940 GN=POLR3A PE=3 SV=1	POLR3A	0.15718	1.88819
Pumilio RNA binding family member 2 OS=Ovis aries OX=9940 GN=PUM2 PE=4 SV=1	PUM2	0.156574	0.858136
Coatomer subunit zeta OS=Ovis aries OX=9940 GN=COPZ2 PE=3 SV=1	COPZ2	0.156287	0.923228
Uncharacterized protein OS=Ovis aries OX=9940 PE=3 SV=1	LOC101104731; MYCBP; LOC105605372	0.156213	1.21011
acidPPc domain-containing protein OS=Ovis aries OX=9940 GN=PLPP3 PE=3 SV=1	PLPP3	0.155841	1.73157
Uncharacterized protein OS=Ovis aries OX=9940 PE=3 SV=1		0.155303	2.23791
Pyruvate carboxylase OS=Ovis aries OX=9940 GN=PC PE=4 SV=1	PC	0.155039	2.0836
Lumican OS=Ovis aries OX=9940 GN=LUM PE=3 SV=1	LUM	0.154936	0.919254
C-type lectin domain containing 14A OS=Ovis aries OX=9940 GN=CLEC14A PE=4 SV=1	CLEC14A	0.15467	2.88783
Uncharacterized protein OS=Ovis aries OX=9940 GN=SCFD2 PE=3 SV=1	SCFD2	0.154635	0.311043
Erythrocyte membrane protein band 4.1 like 3 OS=Ovis aries OX=9940 GN=EPB41L3 PE=4 SV=1	EPB41L3	0.154623	1.75033
Peptidylprolyl isomerase OS=Ovis aries OX=9940 PE=4 SV=1		0.154306	0.891779
Uncharacterized protein OS=Ovis aries OX=9940 GN=AHCTF1 PE=4 SV=1	AHCTF1	0.154163	0.779226
Mannose receptor C type 2 OS=Ovis aries OX=9940 GN=MRC2 PE=4 SV=1	MRC2	0.154102	1.16068
Uncharacterized protein OS=Ovis aries OX=9940 GN=LAMA4 PE=4 SV=1	LAMA4	0.153382	1.58159
Calmodulin OS=Ovis aries OX=9940 GN=CALM1 PE=3 SV=1	CALM1	0.153307	0.449053
HDGF like 2 OS=Ovis aries OX=9940 GN=HDGFL2 PE=3 SV=1	HDGFL2	0.152606	1.82638
Chromosome 21 open reading frame 33 OS=Ovis aries OX=9940 GN=C21orf33 PE=2 SV=1	C21orf33	0.152054	1.29447
Copper transport protein ATOX1 OS=Ovis aries OX=9940 GN=ATOX1 PE=3 SV=1	ATOX1	0.151999	0.911312
Protein KRI1 homolog OS=Ovis aries OX=9940 GN=KRI1 PE=3 SV=1	KRI1	0.151827	1.47225
TP53 induced glycolysis regulatory phosphatase OS=Ovis aries OX=9940 GN=TIGAR PE=4 SV=1	TIGAR	0.151741	0.67342
Dolichyl-diphosphooligosaccharide--protein glycosyltransferase subunit DAD1 OS=Ovis aries OX=9940 GN=DAD1 PE=3 SV=1	DAD1	0.151549	2.04843
Rab-GAP TBC domain-containing protein OS=Ovis aries OX=9940 GN=TBC1D25 PE=4 SV=1	TBC1D25	0.151256	0.376794
UBX domain protein 4 OS=Ovis aries OX=9940 GN=UBXN4 PE=4 SV=1	UBXN4	0.151191	1.36853
Sulfhydryl oxidase OS=Ovis aries OX=9940 PE=4 SV=1		0.150868	0.759647
Arsenite-resistance protein 2 OS=Ovis aries OX=9940 GN=SRRT PE=3 SV=1	SRRT	0.14973	1.21706
Signal sequence receptor subunit alpha OS=Ovis aries OX=9940 GN=SSR1 PE=3 SV=1	SSR1	0.149347	1.36035
Uncharacterized protein OS=Ovis aries OX=9940 PE=4 SV=1		0.148749	1.0419
IF rod domain-containing protein OS=Ovis aries OX=9940 GN=KRT74 PE=3 SV=1	KRT74	0.148522	1.17538
Tyrosine-protein kinase receptor OS=Ovis aries OX=9940 GN=INSR PE=3 SV=1	INSR	0.148254	2.48946
Reticulocalbin 2 OS=Ovis aries OX=9940 GN=RCN2 PE=4 SV=1	RCN2	0.147102	1.10633
WD_REPEATS_REGION domain-containing protein OS=Ovis aries OX=9940 GN=RBBP5 PE=4 SV=1	RBBP5	0.147074	0.164514
Butyrophilin like 2 OS=Ovis aries OX=9940 GN=BTNL2 PE=4 SV=1	BTNL2	0.147028	1.03301
Uncharacterized protein OS=Ovis aries OX=9940 GN=METTL14 PE=3 SV=1	METTL14	0.146959	0.759725
Uncharacterized protein OS=Ovis aries OX=9940 GN=DNAJC1 PE=4 SV=1	DNAJC1	0.146938	0.584942
Tubulin tyrosine ligase like 12 OS=Ovis aries OX=9940 GN=TTLL12 PE=4 SV=1	TTLL12	0.146829	2.51807
Fructose-bisphosphate aldolase OS=Ovis aries OX=9940 GN=ALDOA PE=3 SV=1	ALDOA	0.146643	0.599061
Uncharacterized protein OS=Ovis aries OX=9940 GN=RPLP2 PE=3 SV=1	RPLP2	0.14659	0.902416
Supervillin OS=Ovis aries OX=9940 GN=SVIL PE=3 SV=1	SVIL	0.146556	2.27636
60S ribosomal protein L11 OS=Ovis aries OX=9940 GN=RPL11 PE=3 SV=1	RPL11	0.146359	1.43041
Creatine kinase OS=Ovis aries OX=9940 PE=3 SV=1		0.146331	1.27472
WD_REPEATS_REGION domain-containing protein OS=Ovis aries OX=9940 GN=STRN PE=3 SV=1	STRN	0.146186	0.349216
Uncharacterized protein OS=Ovis aries OX=9940 GN=ACP6 PE=4 SV=1	ACP6	0.14604	0.920178
SP100 nuclear antigen OS=Ovis aries OX=9940 PE=4 SV=1		0.145656	0.875233
Uncharacterized protein OS=Ovis aries OX=9940 PE=4 SV=1		0.145506	0.329438
Stomatin OS=Ovis aries OX=9940 GN=STOM PE=3 SV=1	STOM	0.145306	1.4585
Glutathione peroxidase OS=Ovis aries OX=9940 GN=GPX7 PE=3 SV=1	GPX7	0.145229	0.57707
Uncharacterized protein OS=Ovis aries OX=9940 GN=EPS15 PE=4 SV=1	EPS15	0.144888	0.777983
Lamin B2 OS=Ovis aries OX=9940 GN=LMNB2 PE=3 SV=1	LMNB2	0.144255	1.718
[Histone H3]-trimethyl-L-lysine(4) demethylase OS=Ovis aries OX=9940 GN=KDM5C PE=3 SV=1	KDM5C	0.143687	0.535949
Alpha-dystroglycan OS=Ovis aries OX=9940 GN=DAG1 PE=4 SV=1	DAG1	0.143398	2.75951
Uncharacterized protein OS=Ovis aries OX=9940 GN=TMEM33 PE=3 SV=1	TMEM33	0.142963	1.51906
Uncharacterized protein OS=Ovis aries OX=9940 GN=PLAC9 PE=4 SV=1	PLAC9	0.142171	0.622407
Uncharacterized protein OS=Ovis aries OX=9940 GN=TAF5 PE=3 SV=1	TAF5	0.141702	1.18242
DNA replication licensing factor MCM7 OS=Ovis aries OX=9940 GN=MCM7 PE=3 SV=1	MCM7	0.141653	0.845686
RNA binding motif protein 10 OS=Ovis aries OX=9940 GN=RBM10 PE=4 SV=1	RBM10	0.141168	1.60821
Peptidyl-prolyl cis-trans isomerase OS=Ovis aries OX=9940 GN=PPIB PE=3 SV=1	PPIB	0.141006	1.19569
Nucleolin OS=Ovis aries OX=9940 GN=NCL PE=4 SV=1	NCL	0.141005	1.52353
GOLD domain-containing protein OS=Ovis aries OX=9940 GN=NEK9 PE=3 SV=1	NEK9	0.140842	1.56414
Poly [ADP-ribose] polymerase OS=Ovis aries OX=9940 GN=ZC3HAV1 PE=4 SV=1	ZC3HAV1	0.140817	0.542108
YTH domain-containing protein OS=Ovis aries OX=9940 GN=YTHDF3 PE=4 SV=1	YTHDF3	0.140332	1.40654
Hippocalcin-like protein 1 OS=Ovis aries OX=9940 GN=HPCAL1 PE=2 SV=1	HPCAL1	0.140034	1.70255
Uncharacterized protein OS=Ovis aries OX=9940 GN=HTT PE=3 SV=1	HTT	0.139955	0.700507
Uncharacterized protein OS=Ovis aries OX=9940 PE=4 SV=1	LOC101104133	0.139952	0.472752
Ribosomal protein S6 kinase B2 OS=Ovis aries OX=9940 GN=RPS6KB2 PE=3 SV=1	RPS6KB2	0.139368	0.880318
Pseudouridylate synthase 1 OS=Ovis aries OX=9940 GN=PUS1 PE=2 SV=1	PUS1	0.139146	0.165616
GYF domain-containing protein OS=Ovis aries OX=9940 GN=GIGYF2 PE=4 SV=1	GIGYF2	0.138783	0.972231
Cartilage associated protein OS=Ovis aries OX=9940 GN=CRTAP PE=4 SV=1	CRTAP	0.138587	0.850189
Uncharacterized protein OS=Ovis aries OX=9940 GN=MYH10 PE=3 SV=1	MYH10	0.138446	1.72215
Surfeit 6 OS=Ovis aries OX=9940 GN=SURF6 PE=3 SV=1	SURF6	0.137967	0.63372
Ubiquitin specific peptidase 47 OS=Ovis aries OX=9940 GN=USP47 PE=4 SV=1	USP47	0.13782	0.738052
Serpin family B member 13 OS=Ovis aries OX=9940 GN=SERPINB13 PE=3 SV=1	SERPINB13	0.137682	0.506202
AFP-like domain-containing protein OS=Ovis aries OX=9940 GN=NANS PE=4 SV=1	NANS	0.137669	1.09177
Uncharacterized protein OS=Ovis aries OX=9940 GN=LOC101119456 PE=3 SV=1	LOC101119456	0.137584	0.874463
E3 ubiquitin protein ligase OS=Ovis aries OX=9940 GN=RNF20 PE=3 SV=1	RNF20	0.137424	0.364399
AH domain-containing protein OS=Ovis aries OX=9940 GN=ARFIP2 PE=4 SV=1	ARFIP2	0.137101	1.13247
LIM domain containing preferred translocation partner in lipoma OS=Ovis aries OX=9940 GN=LPP PE=4 SV=1	LPP	0.136433	1.14004
Uncharacterized protein OS=Ovis aries OX=9940 GN=GON7 PE=4 SV=1	GON7	0.136405	0.958785
Caseinolytic mitochondrial matrix peptidase chaperone subunit OS=Ovis aries OX=9940 GN=CLPX PE=4 SV=1	CLPX	0.136133	0.798383
RL10P_insert domain-containing protein OS=Ovis aries OX=9940 PE=4 SV=1	LOC101103220	0.136131	0.508578
Uncharacterized protein OS=Ovis aries OX=9940 PE=4 SV=1		0.135769	2.79969
Condensin complex subunit 1 OS=Ovis aries OX=9940 GN=NCAPD2 PE=3 SV=1	NCAPD2	0.135628	0.646188
Importin-13 OS=Ovis aries OX=9940 GN=IPO13 PE=3 SV=1	IPO13	0.135575	0.600547
Alpha-galactosidase OS=Ovis aries OX=9940 PE=2 SV=1	NAGA	0.135507	1.09694
Annexin OS=Ovis aries OX=9940 GN=ANXA13 PE=3 SV=1	ANXA13	0.135275	1.2285
ATP synthase F1 subunit delta OS=Ovis aries OX=9940 GN=ATP5F1D PE=3 SV=1	ATP5F1D	0.135002	0.525922
Glutathione transferase (Fragment) OS=Ovis aries OX=9940 GN=GST PE=2 SV=1	GST	0.134588	1.08104
DNA helicase OS=Ovis aries OX=9940 GN=MCM6 PE=3 SV=1	MCM6	0.134294	0.771992
Elongation factor 1-beta OS=Ovis aries OX=9940 GN=LOC114113944 PE=3 SV=1	LOC114113944	0.133986	0.663381
Phosphate transporter OS=Ovis aries OX=9940 GN=SLC20A2 PE=3 SV=1	SLC20A2	0.133018	0.830267
Uncharacterized protein OS=Ovis aries OX=9940 GN=SSB PE=4 SV=1	SSB	0.132991	1.28032
Geranylgeranyl transferase type I subunit beta OS=Ovis aries OX=9940 GN=PGGT1B PE=3 SV=1	PGGT1B	0.132615	0.721979
DNA polymerase delta interacting protein 2 OS=Ovis aries OX=9940 GN=POLDIP2 PE=4 SV=1	POLDIP2	0.132591	0.387116
Nidogen 1 OS=Ovis aries OX=9940 GN=NID1 PE=4 SV=1	NID1	0.132376	1.83903
Zinc finger protein 106 OS=Ovis aries OX=9940 GN=ZNF106 PE=4 SV=1	ZNF106	0.13177	0.644054
BCL9 like OS=Ovis aries OX=9940 GN=BCL9L PE=3 SV=1	BCL9L	0.131704	0.752375
Uncharacterized protein OS=Ovis aries OX=9940 GN=MRPS9 PE=3 SV=1	MRPS9	0.131422	1.33885
RNA helicase aquarius OS=Ovis aries OX=9940 GN=AQR PE=3 SV=1	AQR	0.131266	1.11485
2-C-methyl-D-erythritol 4-phosphate cytidylyltransferase-like protein OS=Ovis aries OX=9940 GN=CRPPA PE=3 SV=1	CRPPA	0.131263	0.544936
Heme oxygenase (biliverdin-producing) OS=Ovis aries OX=9940 GN=HMOX2 PE=3 SV=1	HMOX2	0.131255	1.7522
Uncharacterized protein OS=Ovis aries OX=9940 PE=4 SV=1		0.131115	0.55758
COMM domain-containing protein OS=Ovis aries OX=9940 GN=COMMD9 PE=4 SV=1	COMMD9	0.130942	0.628929
HDGF like 3 OS=Ovis aries OX=9940 GN=HDGFL3 PE=4 SV=1	HDGFL3	0.130451	1.09228
Histone-lysine N-methyltransferase SETD7 OS=Ovis aries OX=9940 GN=SETD7 PE=3 SV=1	SETD7	0.13042	1.37841
Uncharacterized protein OS=Ovis aries OX=9940 GN=TSC22D2 PE=3 SV=1	TSC22D2	0.13022	0.506695
Creatine kinase OS=Ovis aries OX=9940 GN=CKMT2 PE=3 SV=1	CKMT2	0.129666	0.147747
Endothelin-converting enzyme 1 OS=Ovis aries OX=9940 GN=ECE1 PE=3 SV=1	ECE1	0.1294	0.381816
AP-1 complex subunit mu-1 OS=Ovis aries OX=9940 GN=AP1M1 PE=3 SV=1	AP1M1	0.129125	1.16223
Dedicator of cytokinesis 7 OS=Ovis aries OX=9940 GN=DOCK7 PE=3 SV=1	DOCK7	0.128945	1.00071
Trichohyalin OS=Ovis aries OX=9940 GN=TCHH PE=2 SV=2	TCHH	0.128907	0.521769
Calreticulin OS=Ovis aries OX=9940 GN=CALR PE=3 SV=1	CALR	0.128839	0.901133
Cytoglobin OS=Ovis aries OX=9940 GN=CYGB PE=2 SV=1	CYGB	0.128151	0.863194
N-acetylglucosamine-6-phosphate deacetylase OS=Ovis aries OX=9940 PE=3 SV=1		0.128113	0.499991
Galectin-3-binding protein OS=Ovis aries OX=9940 GN=LGALS3BP PE=4 SV=1	LGALS3BP	0.128076	0.916012
Uncharacterized protein OS=Ovis aries OX=9940 GN=AKT1S1 PE=4 SV=1	AKT1S1	0.127623	0.806155
Aftiphilin OS=Ovis aries OX=9940 GN=AFTPH PE=4 SV=1	AFTPH	0.127593	0.82067
Procollagen-proline 3-dioxygenase OS=Ovis aries OX=9940 GN=P3H3 PE=3 SV=1	P3H3	0.127535	1.03953
Epithelial splicing regulatory protein 2 OS=Ovis aries OX=9940 GN=ESRP2 PE=3 SV=1	ESRP2	0.127519	1.04735
Glucocorticoid receptor OS=Ovis aries OX=9940 GN=NR3C1 PE=3 SV=1	NR3C1	0.127209	1.38134
Extended synaptotagmin 2 OS=Ovis aries OX=9940 GN=ESYT2 PE=3 SV=1	ESYT2	0.127155	1.04971
Uncharacterized protein OS=Ovis aries OX=9940 GN=PDIA6 PE=3 SV=1	PDIA6	0.1271	1.60094
Filamin A OS=Ovis aries OX=9940 GN=FLNA PE=3 SV=1	FLNA	0.127082	1.73255
Transcription factor GABP alpha subunit (Fragment) OS=Ovis aries OX=9940 PE=2 SV=1	GABPA	0.126714	1.90059
Arf-GAP domain-containing protein OS=Ovis aries OX=9940 GN=ARFGAP3 PE=4 SV=1	ARFGAP3	0.126471	1.1125
Uncharacterized protein OS=Ovis aries OX=9940 GN=RAB5A PE=4 SV=1	RAB5A	0.126435	0.370845
Heat shock protein family H (Hsp110) member 1 OS=Ovis aries OX=9940 GN=HSPH1 PE=3 SV=1	HSPH1	0.126241	0.773505
Uncharacterized protein OS=Ovis aries OX=9940 GN=CANX PE=3 SV=1	CANX	0.125485	2.16685
Myosin binding protein C, fast type OS=Ovis aries OX=9940 GN=MYBPC2 PE=4 SV=1	MYBPC2	0.125389	0.252329
Adenylate kinase isoenzyme 1 OS=Ovis aries OX=9940 GN=AK1 PE=2 SV=1	AK1	0.125251	0.357443
Solute carrier family 25 member 22 OS=Ovis aries OX=9940 GN=SLC25A22 PE=3 SV=1	SLC25A22	0.125094	0.965169
RNA polymerase-associated protein LEO1 OS=Ovis aries OX=9940 GN=LEO1 PE=3 SV=1	LEO1	0.124797	1.23514
Uncharacterized protein OS=Ovis aries OX=9940 GN=SFSWAP PE=4 SV=1	SFSWAP	0.123668	0.284142
Uncharacterized protein OS=Ovis aries OX=9940 GN=MFAP5 PE=3 SV=1	MFAP5	0.123634	0.455591
Cytochrome p450 oxidoreductase OS=Ovis aries OX=9940 GN=POR PE=4 SV=1	POR	0.123084	1.19869
Enhancer of rudimentary homolog OS=Ovis aries OX=9940 PE=3 SV=1	LOC101105689	0.12288	1.49271
Matrin-type domain-containing protein OS=Ovis aries OX=9940 GN=SF3A3 PE=3 SV=1	SF3A3	0.122333	0.543099
Uncharacterized protein OS=Ovis aries OX=9940 GN=PGM2L1 PE=3 SV=1	PGM2L1	0.122107	0.655491
Armadillo repeat containing 10 OS=Ovis aries OX=9940 GN=ARMC10 PE=3 SV=1	ARMC10	0.121946	0.56777
Tensin 2 OS=Ovis aries OX=9940 GN=TNS2 PE=3 SV=1	TNS2	0.121935	0.549042
PH domain-containing protein OS=Ovis aries OX=9940 GN=FERMT2 PE=3 SV=1	FERMT2	0.12192	1.82735
Molybdopterin synthase sulfur carrier subunit OS=Ovis aries OX=9940 GN=MOCS2 PE=3 SV=1	MOCS2	0.121388	0.981453
Transducin beta like 1 X-linked receptor 1 OS=Ovis aries OX=9940 GN=TBL1XR1 PE=4 SV=1	TBL1XR1	0.121298	1.63439
Inositol 1,4,5-trisphosphate receptor type 1 OS=Ovis aries OX=9940 GN=ITPR1 PE=3 SV=1	ITPR1	0.121039	1.49965
E3 ubiquitin-protein ligase RING1 OS=Ovis aries OX=9940 GN=RING1 PE=4 SV=1	RING1	0.120717	0.835444
Non-specific serine/threonine protein kinase OS=Ovis aries OX=9940 GN=WNK1 PE=4 SV=1	WNK1	0.120635	0.231964
Pyruvate dehydrogenase phosphatase regulatory subunit OS=Ovis aries OX=9940 GN=PDPR PE=3 SV=1	PDPR	0.120441	1.42107
PKD domain-containing protein OS=Ovis aries OX=9940 GN=GPNMB PE=4 SV=1	GPNMB	0.120293	0.74812
General transcription factor IIIC subunit 1 OS=Ovis aries OX=9940 GN=GTF3C1 PE=4 SV=1	GTF3C1	0.120062	0.625532
RRM domain-containing protein OS=Ovis aries OX=9940 GN=RALY PE=3 SV=1	RALY	0.120007	0.886716
EARP and GARP complex-interacting protein 1 OS=Ovis aries OX=9940 GN=EIPR1 PE=3 SV=1	EIPR1	0.119923	1.13043
T-complex protein 1 subunit delta OS=Ovis aries OX=9940 PE=3 SV=1		0.119865	0.710024
N-acetyl-alpha-glucosaminidase OS=Ovis aries OX=9940 GN=NAGLU PE=4 SV=1	NAGLU	0.119679	0.485198
Microtubule associated protein 1A OS=Ovis aries OX=9940 GN=MAP1A PE=4 SV=1	MAP1A	0.119599	1.39
78 kDa glucose-regulated protein OS=Ovis aries OX=9940 GN=HSPA5 PE=3 SV=1	HSPA5	0.119386	1.10817
Cochlin OS=Ovis aries OX=9940 GN=COCH PE=4 SV=1	COCH	0.119345	1.31239
Uncharacterized protein OS=Ovis aries OX=9940 GN=CASP6 PE=3 SV=1	CASP6	0.118012	0.713476
Uncharacterized protein OS=Ovis aries OX=9940 GN=RBBP6 PE=4 SV=1	RBBP6	0.118	0.924172
Thioredoxin domain-containing protein OS=Ovis aries OX=9940 GN=TXN2 PE=4 SV=1	TXN2	0.117838	0.484973
Mediator of ErbB2-driven cell motility 1 OS=Ovis aries OX=9940 GN=MEMO1 PE=3 SV=1	MEMO1	0.117338	0.526337
Ankyrin repeat and sterile alpha motif domain containing 1A OS=Ovis aries OX=9940 GN=ANKS1A PE=4 SV=1	ANKS1A	0.117337	0.742422
RRM domain-containing protein OS=Ovis aries OX=9940 PE=4 SV=1		0.117315	1.81962
Scaffold attachment factor B2 OS=Ovis aries OX=9940 GN=SAFB2 PE=4 SV=1	SAFB2	0.117268	0.748306
Uncharacterized protein OS=Ovis aries OX=9940 GN=NXF1 PE=3 SV=1	NXF1	0.116815	0.519335
Tyrosine-protein kinase OS=Ovis aries OX=9940 GN=HCK PE=3 SV=1	HCK	0.116787	0.246521
Uncharacterized protein OS=Ovis aries OX=9940 PE=3 SV=1	LOC101111388	0.116653	1.41754
Uncharacterized protein OS=Ovis aries OX=9940 GN=NFX1 PE=3 SV=1	NFX1	0.116578	1.13864
Ubiquitin-60S ribosomal protein L40 OS=Ovis aries OX=9940 GN=UBA52 PE=2 SV=2	UBA52	0.116522	1.59937
Microtubule associated protein 1S OS=Ovis aries OX=9940 GN=MAP1S PE=4 SV=1	MAP1S	0.116313	0.873103
Lectin, mannose binding 1 OS=Ovis aries OX=9940 GN=LMAN1 PE=4 SV=1	LMAN1	0.116128	1.2619
Talin 2 OS=Ovis aries OX=9940 GN=TLN2 PE=4 SV=1	TLN2	0.115978	1.37766
VPS10 domain-containing protein OS=Ovis aries OX=9940 GN=SORT1 PE=4 SV=1	SORT1	0.115953	1.66642
Uncharacterized protein OS=Ovis aries OX=9940 GN=LRRC40 PE=4 SV=1	LRRC40	0.115482	0.599515
PC4 and SFRS1 interacting protein 1 OS=Ovis aries OX=9940 GN=PSIP1 PE=3 SV=1	PSIP1	0.115267	1.32097
Uncharacterized protein OS=Ovis aries OX=9940 GN=TPM3 PE=3 SV=1	TPM3	0.115183	0.344028
Rabenosyn, RAB effector OS=Ovis aries OX=9940 GN=RBSN PE=4 SV=1	RBSN	0.114492	0.677373
Heat shock protein family B (small) member 1 OS=Ovis aries OX=9940 GN=HSPB1 PE=4 SV=1	HSPB1	0.114314	1.21566
Ras-related protein Rab-18 OS=Ovis aries OX=9940 GN=RAB18 PE=4 SV=1	RAB18	0.11401	0.942484
Nestin OS=Ovis aries OX=9940 GN=NES PE=3 SV=1	NES	0.113028	0.477048
Nuclear autoantigenic sperm protein OS=Ovis aries OX=9940 PE=3 SV=1	NASP	0.112752	0.783753
V-set and immunoglobulin domain containing 8 OS=Ovis aries OX=9940 GN=VSIG8 PE=4 SV=1	VSIG8	0.112431	0.176589
Phosphatidylinositol glycan anchor biosynthesis class T OS=Ovis aries OX=9940 GN=PIGT PE=4 SV=1	PIGT	0.111924	1.80208
Staphylococcal nuclease domain-containing protein OS=Ovis aries OX=9940 GN=SND1 PE=4 SV=1	SND1	0.111519	1.02864
Uncharacterized protein OS=Ovis aries OX=9940 GN=MOSPD2 PE=4 SV=1	MOSPD2	0.111463	1.15553
Uncharacterized protein OS=Ovis aries OX=9940 GN=LRRFIP1 PE=3 SV=1	LRRFIP1	0.111122	0.432366
Histocompatibility minor 13 OS=Ovis aries OX=9940 GN=HM13 PE=3 SV=1	HM13	0.110954	1.85247
Dolichyl-diphosphooligosaccharide--protein glycosyltransferase 48 kDa subunit OS=Ovis aries OX=9940 GN=DDOST PE=3 SV=1	DDOST	0.110842	0.965184
Vesicle transport protein OS=Ovis aries OX=9940 GN=SFT2D2 PE=3 SV=1	SFT2D2	0.110773	0.244209
NAC-A/B domain-containing protein OS=Ovis aries OX=9940 GN=NACA PE=4 SV=1	NACA	0.110717	1.02634
Ubiquitin conjugating enzyme E2 G1 OS=Ovis aries OX=9940 GN=UBE2G1 PE=3 SV=1	UBE2G1	0.110545	0.520433
Uncharacterized protein OS=Ovis aries OX=9940 GN=PCOLCE PE=4 SV=1	PCOLCE	0.110423	0.709155
Uncharacterized protein OS=Ovis aries OX=9940 GN=RABGAP1 PE=4 SV=1	RABGAP1	0.109525	2.57103
DnaJ heat shock protein family (Hsp40) member B4 OS=Ovis aries OX=9940 GN=DNAJB4 PE=4 SV=1	DNAJB4	0.109185	1.61399
Glutathione S-transferase kappa OS=Ovis aries OX=9940 GN=GSTK1 PE=3 SV=1	GSTK1	0.108834	0.829418
Pescadillo homolog OS=Ovis aries OX=9940 GN=PES1 PE=3 SV=1	PES1	0.108708	0.618386
Zinc finger NFX1-type containing 1 OS=Ovis aries OX=9940 GN=ZNFX1 PE=4 SV=1	ZNFX1	0.108634	0.996515
Nuclear envelope membrane protein OS=Ovis aries OX=9940 GN=NRM PE=3 SV=1	NRM	0.108239	1.39185
Pinin OS=Ovis aries OX=9940 GN=PNN PE=3 SV=1	PNN	0.107491	1.00627
SCP domain-containing protein OS=Ovis aries OX=9940 PE=4 SV=1		0.107357	1.28541
39S ribosomal protein L46, mitochondrial OS=Ovis aries OX=9940 GN=MRPL46 PE=3 SV=1	MRPL46	0.107301	0.243724
Uncharacterized protein OS=Ovis aries OX=9940 GN=INTS4 PE=4 SV=1	INTS4	0.10702	1.08999
eIF4GI protein (Fragment) OS=Ovis aries OX=9940 GN=eIF4GI PE=2 SV=1	eIF4GI	0.106765	0.665094
Tensin 1 OS=Ovis aries OX=9940 GN=TNS1 PE=3 SV=1	TNS1	0.106181	1.22133
LDL receptor related protein 1 OS=Ovis aries OX=9940 GN=LRP1 PE=3 SV=1	LRP1	0.105537	1.10576
Kallikrein related peptidase 6 OS=Ovis aries OX=9940 GN=KLK6 PE=4 SV=1	KLK6	0.105522	0.419577
Melanoma cell adhesion molecule OS=Ovis aries OX=9940 GN=MCAM PE=4 SV=1	MCAM	0.105516	1.11754
Uncharacterized protein OS=Ovis aries OX=9940 GN=CETN3 PE=4 SV=1	CETN3	0.104609	0.655314
Uncharacterized protein OS=Ovis aries OX=9940 GN=LAS1L PE=4 SV=1	LAS1L	0.104479	1.51642
Vacuolar protein sorting-associated protein 41 homolog OS=Ovis aries OX=9940 GN=VPS41 PE=3 SV=1	VPS41	0.104443	0.442595
Matrin-type domain-containing protein OS=Ovis aries OX=9940 GN=SF3A2 PE=3 SV=1	SF3A2	0.104382	1.14662
RNAse_Pc domain-containing protein OS=Ovis aries OX=9940 GN=RNASE4 PE=3 SV=1	RNASE4	0.104259	1.08297
Uncharacterized protein OS=Ovis aries OX=9940 GN=LRRC59 PE=4 SV=1	LRRC59	0.104023	0.941326
GOLD domain-containing protein OS=Ovis aries OX=9940 PE=3 SV=1	LOC101106591; TMED7	0.104014	2.02975
Dishevelled associated activator of morphogenesis 2 OS=Ovis aries OX=9940 GN=DAAM2 PE=4 SV=1	DAAM2	0.103964	0.883911
Thyroid hormone receptor interactor 10 OS=Ovis aries OX=9940 GN=TRIP10 PE=3 SV=1	TRIP10	0.103726	2.31802
Tubulin polymerization-promoting protein family member 3 OS=Ovis aries OX=9940 GN=TPPP3 PE=3 SV=1	TPPP3	0.103705	1.71187
FHA domain-containing protein OS=Ovis aries OX=9940 GN=PPP1R8 PE=4 SV=1	PPP1R8	0.103601	0.247636
Epsin 1 OS=Ovis aries OX=9940 GN=EPN1 PE=3 SV=1	EPN1	0.103562	0.260033
RAN binding protein 1 OS=Ovis aries OX=9940 GN=RANBP1 PE=4 SV=1	RANBP1	0.103413	0.292241
PUM-HD domain-containing protein OS=Ovis aries OX=9940 GN=PUM1 PE=4 SV=1	PUM1	0.103344	1.23096
Tyrosine-protein phosphatase non-receptor type OS=Ovis aries OX=9940 GN=PTPN11 PE=3 SV=1	PTPN11	0.103128	1.01607
Aminopeptidase OS=Ovis aries OX=9940 GN=ANPEP PE=3 SV=1	ANPEP	0.103003	1.41778
Cyclin dependent kinase 9 OS=Ovis aries OX=9940 GN=CDK9 PE=4 SV=1	CDK9	0.102496	0.836091
Dihydrolipoamide acetyltransferase component of pyruvate dehydrogenase complex OS=Ovis aries OX=9940 GN=PDHX PE=3 SV=1	PDHX	0.102407	0.808085
PKS_ER domain-containing protein OS=Ovis aries OX=9940 GN=CRYZL1 PE=4 SV=1	CRYZL1	0.102338	1.45719
Uncharacterized protein OS=Ovis aries OX=9940 GN=HSDL1 PE=3 SV=1	HSDL1	0.101986	1.09075
Uncharacterized protein OS=Ovis aries OX=9940 GN=LAMA2 PE=4 SV=1	LAMA2	0.10108	0.829746
CutA divalent cation tolerance homolog OS=Ovis aries OX=9940 GN=CUTA PE=3 SV=1	CUTA	0.10065	0.551702
Polypeptide N-acetylgalactosaminyltransferase OS=Ovis aries OX=9940 GN=GALNT14 PE=3 SV=1	GALNT14	0.100382	0.313301
Uncharacterized protein OS=Ovis aries OX=9940 PE=3 SV=1		0.0996248	1.21696
Dolichol-phosphate mannosyltransferase subunit 1 OS=Ovis aries OX=9940 GN=DPM1 PE=3 SV=1	DPM1	0.0994839	0.670047
NOT2_3_5 domain-containing protein OS=Ovis aries OX=9940 GN=CNOT2 PE=3 SV=1	CNOT2	0.0993151	0.298624
Occludin OS=Ovis aries OX=9940 GN=OCLN PE=3 SV=1	OCLN	0.0990908	0.308273
GATOR complex protein SEC13 OS=Ovis aries OX=9940 GN=SEC13 PE=3 SV=1	SEC13	0.098933	1.04551
Slingshot protein phosphatase 3 OS=Ovis aries OX=9940 GN=SSH3 PE=3 SV=1	SSH3	0.0989187	1.29414
Metallophos domain-containing protein OS=Ovis aries OX=9940 GN=SMPDL3B PE=3 SV=1	SMPDL3B	0.0987831	0.653664
Gamma-synuclein OS=Ovis aries OX=9940 GN=SNCA PE=3 SV=1	SNCA	0.0986604	0.808325
Uncharacterized protein OS=Ovis aries OX=9940 GN=LAMC1 PE=4 SV=1	LAMC1	0.0986355	0.956941
AMMECR nuclear protein 1 OS=Ovis aries OX=9940 GN=AMMECR1 PE=4 SV=1	AMMECR1	0.0985412	0.469144
Elongation factor G, mitochondrial OS=Ovis aries OX=9940 GN=GFM1 PE=3 SV=1	GFM1	0.098518	0.677499
DENN domain containing 10 OS=Ovis aries OX=9940 GN=DENND10 PE=3 SV=1	DENND10	0.0984938	0.570612
Uncharacterized protein OS=Ovis aries OX=9940 GN=NCOA5 PE=4 SV=1	NCOA5	0.0982651	0.578498
Histone H2A.Z OS=Ovis aries OX=9940 GN=H2AZ1 PE=2 SV=3	H2AZ1	0.098214	0.448733
Thioredoxin domain-containing protein OS=Ovis aries OX=9940 GN=ERP44 PE=4 SV=1	ERP44	0.0981607	1.69618
Uncharacterized protein OS=Ovis aries OX=9940 GN=YLPM1 PE=4 SV=1	YLPM1	0.097968	2.1529
PKS_ER domain-containing protein OS=Ovis aries OX=9940 PE=4 SV=1		0.0979298	0.177219
PDZ domain-containing protein OS=Ovis aries OX=9940 GN=SYNPO2 PE=4 SV=1	SYNPO2	0.0978615	0.841533
Transmembrane protein 119 OS=Ovis aries OX=9940 GN=TMEM119 PE=4 SV=1	TMEM119	0.0973716	0.759575
Uncharacterized protein OS=Ovis aries OX=9940 GN=PSORS1C2 PE=4 SV=1	PSORS1C2	0.0968719	0.550903
Phosphoacetylglucosamine mutase OS=Ovis aries OX=9940 GN=PGM3 PE=3 SV=1	PGM3	0.0967884	0.924207
Adhesion regulating molecule 1 OS=Ovis aries OX=9940 GN=ADRM1 PE=3 SV=1	ADRM1	0.0967609	1.51049
10-formyltetrahydrofolate dehydrogenase OS=Ovis aries OX=9940 GN=ALDH1L2 PE=3 SV=1	ALDH1L2	0.0967276	0.60195
Dolichyl-diphosphooligosaccharide--protein glycosyltransferase subunit 1 OS=Ovis aries OX=9940 PE=3 SV=1		0.0966379	1.29465
Glutamyl-tRNA synthetase OS=Ovis aries OX=9940 GN=EARS2 PE=3 SV=1	EARS2	0.0959695	0.502001
NBAS subunit of NRZ tethering complex OS=Ovis aries OX=9940 GN=NBAS PE=4 SV=1	NBAS	0.0954756	0.295833
Alpha-mannosidase OS=Ovis aries OX=9940 PE=3 SV=1		0.0954089	1.74034
Pyruvate dehydrogenase E1 component subunit beta OS=Ovis aries OX=9940 PE=4 SV=1		0.095099	0.966482
Rab3 GTPase-activating protein catalytic subunit OS=Ovis aries OX=9940 GN=RAB3GAP1 PE=3 SV=1	RAB3GAP1	0.0950753	0.324702
Nucleoside diphosphate kinase OS=Ovis aries OX=9940 GN=NME1-NME2 PE=3 SV=1	NME1-NME2	0.0949695	0.721387
Tyrosine-protein kinase OS=Ovis aries OX=9940 GN=JAK1 PE=3 SV=1	JAK1	0.0943143	0.277143
CCHC-type zinc finger nucleic acid binding protein OS=Ovis aries OX=9940 GN=CNBP PE=4 SV=1	CNBP	0.0942384	1.62667
Uncharacterized protein OS=Ovis aries OX=9940 GN=HEPHL1 PE=3 SV=1	HEPHL1	0.0942343	0.906873
Peptidyl-prolyl cis-trans isomerase OS=Ovis aries OX=9940 GN=PPIL4 PE=3 SV=1	PPIL4	0.0942339	4.23905
RAB GTPase activating protein 1 like OS=Ovis aries OX=9940 GN=RABGAP1L PE=4 SV=1	RABGAP1L	0.0942182	0.429371
C2H2-type domain-containing protein OS=Ovis aries OX=9940 GN=ZNF593 PE=4 SV=1	ZNF593	0.0940542	0.413189
Uncharacterized protein OS=Ovis aries OX=9940 GN=IGF2BP2 PE=3 SV=1	IGF2BP2	0.0937863	0.544168
Phosducin domain-containing protein OS=Ovis aries OX=9940 GN=PDCL PE=3 SV=1	PDCL	0.0935523	0.273586
DAB adaptor protein 2 OS=Ovis aries OX=9940 GN=DAB2 PE=4 SV=1	DAB2	0.0935469	0.480312
Uncharacterized protein OS=Ovis aries OX=9940 GN=PTCD3 PE=3 SV=1	PTCD3	0.0931579	0.544962
Nucleophosmin OS=Ovis aries OX=9940 GN=LOC101113241 PE=3 SV=1	LOC101113241	0.0931091	0.862654
Uncharacterized protein OS=Ovis aries OX=9940 GN=SAR1A PE=3 SV=1	SAR1A	0.092759	0.518245
Testin OS=Ovis aries OX=9940 GN=TES PE=3 SV=1	TES	0.0927521	0.459353
Microsomal signal peptidase 25 kDa subunit OS=Ovis aries OX=9940 GN=SPCS2 PE=3 SV=1	SPCS2	0.0926074	1.05533
RRM domain-containing protein OS=Ovis aries OX=9940 GN=SF3B6 PE=4 SV=1	SF3B6	0.0925778	0.171083
RAD50 interactor 1 OS=Ovis aries OX=9940 GN=RINT1 PE=4 SV=1	RINT1	0.0923293	0.469829
Uncharacterized protein OS=Ovis aries OX=9940 GN=ERGIC3 PE=3 SV=1	ERGIC3	0.0920746	1.3677
Structural maintenance of chromosomes protein OS=Ovis aries OX=9940 GN=SMC4 PE=3 SV=1	SMC4	0.0920555	1.20035
Uncharacterized protein OS=Ovis aries OX=9940 GN=CAVIN2 PE=3 SV=1	CAVIN2	0.09189	1.18727
Collagen type V alpha 1 chain OS=Ovis aries OX=9940 GN=COL5A1 PE=4 SV=1	COL5A1	0.0913556	1.04846
General transcription and DNA repair factor IIH helicase subunit XPD OS=Ovis aries OX=9940 GN=ERCC2 PE=3 SV=1	ERCC2	0.0912244	0.811483
RNA 3'-terminal phosphate cyclase OS=Ovis aries OX=9940 GN=RTCA PE=3 SV=1	RTCA	0.0909698	1.25133
Homeodomain-only protein OS=Ovis aries OX=9940 PE=4 SV=1		0.0908075	0.258407
Ribonucloprotein OS=Ovis aries OX=9940 GN=SNU13 PE=3 SV=1	SNU13	0.0904288	1.26442
ATP synthase-coupling factor 6, mitochondrial OS=Ovis aries OX=9940 GN=ATP5PF PE=3 SV=1	ATP5PF	0.090338	0.767854
Anaphase-promoting complex subunit 5 OS=Ovis aries OX=9940 GN=ANAPC5 PE=3 SV=1	ANAPC5	0.0898964	0.244092
Sorting nexin-30 OS=Ovis aries OX=9940 GN=KIAA1958 PE=3 SV=1	KIAA1958	0.0898784	0.304611
Uncharacterized protein OS=Ovis aries OX=9940 GN=DAAM1 PE=4 SV=1	DAAM1	0.0893509	0.454676
Aspartate beta-hydroxylase OS=Ovis aries OX=9940 GN=ASPH PE=3 SV=1	ASPH	0.0893174	1.2295
Platelet-derived growth factor receptor alpha OS=Ovis aries OX=9940 GN=PDGFRA PE=3 SV=1	PDGFRA	0.0891662	0.284614
FABP domain-containing protein OS=Ovis aries OX=9940 GN=FABP9 PE=3 SV=1	FABP9	0.0885225	0.314697
Inositol-3-phosphate synthase 1 OS=Ovis aries OX=9940 GN=ISYNA1 PE=3 SV=1	ISYNA1	0.0883589	0.86131
Vacuolar protein sorting-associated protein 52 homolog OS=Ovis aries OX=9940 GN=VPS52 PE=3 SV=1	VPS52	0.0876059	1.29696
Coatomer subunit zeta OS=Ovis aries OX=9940 GN=COPZ1 PE=3 SV=1	COPZ1	0.0875025	0.920509
Dolichyl-diphosphooligosaccharide--protein glycotransferase OS=Ovis aries OX=9940 GN=STT3A PE=3 SV=1	STT3A	0.0874607	1.85979
Zinc finger and BTB domain containing 7A OS=Ovis aries OX=9940 GN=ZBTB7A PE=4 SV=1	ZBTB7A	0.0871876	0.913263
L-lactate dehydrogenase OS=Ovis aries OX=9940 GN=LDHA PE=3 SV=1	LDHA	0.0871262	1.16786
SGNH_hydro domain-containing protein OS=Ovis aries OX=9940 GN=IAH1 PE=4 SV=1	IAH1	0.0868658	0.362828
Scavenger receptor class A member 5 OS=Ovis aries OX=9940 GN=SCARA5 PE=3 SV=1	SCARA5	0.0863365	1.8342
Sushi repeat containing protein X-linked OS=Ovis aries OX=9940 GN=SRPX PE=4 SV=1	SRPX	0.0862556	1.85969
Uncharacterized protein OS=Ovis aries OX=9940 GN=LOC101107947 PE=4 SV=1	LOC101107947	0.0860112	0.241231
Protein-serine/threonine phosphatase OS=Ovis aries OX=9940 GN=PPM1A PE=3 SV=1	PPM1A	0.0860075	1.49531
Phospholipid-transporting ATPase OS=Ovis aries OX=9940 GN=ATP11C PE=3 SV=1	ATP11C	0.0859006	0.424175
SAP domain-containing protein OS=Ovis aries OX=9940 GN=CCAR1 PE=4 SV=1	CCAR1	0.085663	2.45462
Glial fibrillary acidic protein OS=Ovis aries OX=9940 GN=GFAP PE=3 SV=1	GFAP	0.0851417	0.0694392
Selenocysteine lyase OS=Ovis aries OX=9940 GN=SCLY PE=4 SV=1	SCLY	0.0849208	0.751549
Fibrinogen C-terminal domain-containing protein OS=Ovis aries OX=9940 GN=FGL2 PE=4 SV=1	FGL2	0.0847075	0.203757
Uncharacterized protein OS=Ovis aries OX=9940 PE=4 SV=1		0.0846349	1.00724
SAP domain-containing protein OS=Ovis aries OX=9940 GN=ACIN1 PE=4 SV=1	ACIN1	0.0845448	0.482684
Uncharacterized protein OS=Ovis aries OX=9940 GN=PPP1R2 PE=3 SV=1	PPP1R2	0.0845275	0.324629
CID domain-containing protein OS=Ovis aries OX=9940 GN=RPRD1B PE=4 SV=1	RPRD1B	0.0843605	0.529167
Isocitrate dehydrogenase [NADP] OS=Ovis aries OX=9940 GN=IDH2 PE=3 SV=1	IDH2	0.0842769	0.716166
Uncharacterized protein OS=Ovis aries OX=9940 GN=IK PE=3 SV=1	IK	0.0841573	0.908584
CBFD_NFYB_HMF domain-containing protein OS=Ovis aries OX=9940 GN=DRAP1 PE=4 SV=1	DRAP1	0.0837795	0.497638
Metavinculin OS=Ovis aries OX=9940 GN=VCL PE=3 SV=1	VCL	0.0837147	0.313652
Podocan OS=Ovis aries OX=9940 GN=PODN PE=4 SV=1	PODN	0.0836886	0.487071
Thioredoxin domain-containing protein OS=Ovis aries OX=9940 PE=4 SV=1		0.0836498	0.332732
60S ribosomal protein L34 OS=Ovis aries OX=9940 GN=LOC114118453 PE=3 SV=1	LOC114118453	0.0836117	1.18003
U-box domain-containing protein OS=Ovis aries OX=9940 GN=UBE4A PE=3 SV=1	UBE4A	0.083554	0.434785
PDZ and LIM domain 7 OS=Ovis aries OX=9940 GN=PDLIM7 PE=4 SV=1	PDLIM7	0.0835482	0.709824
Pyridoxal kinase OS=Ovis aries OX=9940 GN=PDXK PE=1 SV=1	PDXK	0.0834941	1.03477
Fascin actin-bundling protein 1 OS=Ovis aries OX=9940 GN=FSCN1 PE=3 SV=1	FSCN1	0.0831561	0.497531
Nucleolar complex protein 2 homolog OS=Ovis aries OX=9940 GN=NOC2L PE=3 SV=1	NOC2L	0.0831538	0.492932
Uncharacterized protein OS=Ovis aries OX=9940 GN=STK38 PE=3 SV=1	STK38	0.0829028	0.521904
G protein-coupled receptor kinase OS=Ovis aries OX=9940 GN=GRK2 PE=3 SV=1	GRK2	0.0828173	0.670741
Laminin subunit gamma 3 OS=Ovis aries OX=9940 GN=LAMC3 PE=4 SV=1	LAMC3	0.0824634	1.58205
Uncharacterized protein OS=Ovis aries OX=9940 GN=LLPH PE=4 SV=1	LLPH	0.0824491	0.236987
Peroxidase OS=Ovis aries OX=9940 GN=PXDN PE=4 SV=1	PXDN	0.0823888	0.892185
THADA armadillo repeat containing OS=Ovis aries OX=9940 GN=THADA PE=3 SV=1	THADA	0.0822603	0.28578
Cytochrome c oxidase subunit 2 OS=Ovis aries OX=9940 GN=COX2 PE=3 SV=1	COX2	0.0822246	0.917296
Uncharacterized protein OS=Ovis aries OX=9940 GN=C16orf58 PE=3 SV=1	C16orf58	0.0822179	0.394051
Rhodanese domain-containing protein OS=Ovis aries OX=9940 GN=TSTD1 PE=4 SV=1	TSTD1	0.0820028	0.453434
Dolichol-phosphate mannosyltransferase subunit 3 OS=Ovis aries OX=9940 GN=DPM3 PE=3 SV=1	DPM3	0.0818915	0.795022
General transcription factor IIIC subunit 4 OS=Ovis aries OX=9940 GN=GTF3C4 PE=4 SV=1	GTF3C4	0.0818211	0.53654
Serine/threonine-protein phosphatase OS=Ovis aries OX=9940 PE=3 SV=1		0.0817584	0.405448
Structural maintenance of chromosomes protein 5 OS=Ovis aries OX=9940 GN=SMC5 PE=3 SV=1	SMC5	0.0813518	0.184328
MAPK regulated corepressor interacting protein 1 OS=Ovis aries OX=9940 GN=MCRIP1 PE=3 SV=1	MCRIP1	0.0813469	0.311486
Importin 9 OS=Ovis aries OX=9940 GN=IPO9 PE=4 SV=1	IPO9	0.0811415	0.471911
Uncharacterized protein OS=Ovis aries OX=9940 GN=MRPL47 PE=3 SV=1	MRPL47	0.0811042	0.15773
Uncharacterized protein OS=Ovis aries OX=9940 PE=3 SV=1		0.0809122	1.10068
Uncharacterized protein OS=Ovis aries OX=9940 GN=NCALD PE=4 SV=1	NCALD	0.0807875	0.256051
Chromobox-like protein 5 OS=Ovis aries OX=9940 GN=CBX5 PE=2 SV=1	CBX5	0.0806865	0.605244
Phosphoenolpyruvate carboxykinase (GTP) OS=Ovis aries OX=9940 GN=PCK2 PE=3 SV=1	PCK2	0.0806148	0.603153
Distal-less homeobox 3 OS=Ovis aries OX=9940 GN=DLX3 PE=3 SV=1	DLX3	0.0804901	0.288232
Neurochondrin OS=Ovis aries OX=9940 GN=NCDN PE=3 SV=1	NCDN	0.0801176	0.198774
Cathepsin B OS=Ovis aries OX=9940 GN=CTSB PE=1 SV=2	CTSB	0.0797991	1.21944
VAMP associated protein B and C OS=Ovis aries OX=9940 GN=VAPB PE=3 SV=1	VAPB	0.0794919	1.33065
ML domain-containing protein OS=Ovis aries OX=9940 GN=GM2A PE=4 SV=1	GM2A	0.0793452	1.25424
Golgin A3 OS=Ovis aries OX=9940 GN=GOLGA3 PE=4 SV=1	GOLGA3	0.0792691	0.305949
SKIP_SNW domain-containing protein OS=Ovis aries OX=9940 GN=SNW1 PE=3 SV=1	SNW1	0.0792115	2.29569
Tr-type G domain-containing protein OS=Ovis aries OX=9940 GN=EFL1 PE=4 SV=1	EFL1	0.0790085	1.0036
Calponin-homology (CH) domain-containing protein OS=Ovis aries OX=9940 GN=LRCH3 PE=4 SV=1	LRCH3	0.0788888	0.126703
26S proteasome AAA-ATPase subunit RPT3 OS=Ovis aries OX=9940 GN=PSMC4 PE=3 SV=1	PSMC4	0.0787635	0.116818
LDLR chaperone MESD OS=Ovis aries OX=9940 GN=MESD PE=3 SV=1	MESD	0.0785813	0.894481
Histone acetyltransferase type B catalytic subunit OS=Ovis aries OX=9940 GN=HAT1 PE=3 SV=1	HAT1	0.0785767	0.511093
40S ribosomal protein S24 OS=Ovis aries OX=9940 PE=3 SV=1		0.0783175	0.686138
Uncharacterized protein OS=Ovis aries OX=9940 GN=ZPR1 PE=3 SV=1	ZPR1	0.0781006	0.203694
Uncharacterized protein OS=Ovis aries OX=9940 GN=GTF3C3 PE=4 SV=1	GTF3C3	0.0776448	0.286152
Cleavage and polyadenylation specificity factor subunit 6 OS=Ovis aries OX=9940 GN=CPSF6 PE=3 SV=1	CPSF6	0.0775969	0.390699
NGFI-A binding protein 2 OS=Ovis aries OX=9940 GN=NAB2 PE=3 SV=1	NAB2	0.0772913	0.937458
Mitochondrial import inner membrane translocase subunit TIM50 OS=Ovis aries OX=9940 GN=TIMM50 PE=3 SV=1	TIMM50	0.0772899	1.0885
Uncharacterized protein OS=Ovis aries OX=9940 GN=DHRS7 PE=3 SV=1	DHRS7	0.0772695	0.944764
Death inducer-obliterator 1 OS=Ovis aries OX=9940 GN=DIDO1 PE=4 SV=1	DIDO1	0.0770502	0.241356
116 kDa U5 small nuclear ribonucleoprotein component OS=Ovis aries OX=9940 GN=EFTUD2 PE=3 SV=1	EFTUD2	0.0769853	0.833907
SCP2 domain-containing protein OS=Ovis aries OX=9940 GN=HSDL2 PE=4 SV=1	HSDL2	0.0768713	0.737068
Eukaryotic translation initiation factor 3 subunit G OS=Ovis aries OX=9940 GN=EIF3G PE=3 SV=1	EIF3G	0.076814	0.483584
TIM21-like protein, mitochondrial OS=Ovis aries OX=9940 GN=TIMM21 PE=3 SV=1	TIMM21	0.0767231	0.254765
DNA helicase OS=Ovis aries OX=9940 GN=MCM5 PE=3 SV=1	MCM5	0.0766978	0.564401
Regulator of chromosome condensation 1 OS=Ovis aries OX=9940 GN=RCC1 PE=4 SV=1	RCC1	0.0763422	1.28223
Heterochromatin protein 1-binding protein 3 OS=Ovis aries OX=9940 GN=HP1BP3 PE=4 SV=1	HP1BP3	0.0761337	0.587759
Annexin (Fragment) OS=Ovis aries OX=9940 GN=ANXA5 PE=2 SV=1	ANXA5	0.0758102	0.638482
Cap methyltransferase 1 OS=Ovis aries OX=9940 GN=CMTR1 PE=4 SV=1	CMTR1	0.0756739	0.387131
Mago-bind domain-containing protein OS=Ovis aries OX=9940 GN=PYM1 PE=3 SV=1	PYM1	0.0752338	0.637573
IF rod domain-containing protein OS=Ovis aries OX=9940 PE=3 SV=1		0.0752321	0.411912
UDP-glucose 4-epimerase OS=Ovis aries OX=9940 GN=GALE PE=3 SV=1	GALE	0.0752222	0.176164
Uncharacterized protein OS=Ovis aries OX=9940 GN=ARHGEF37 PE=4 SV=1	ARHGEF37	0.0751095	0.902038
Cyclin-dependent kinase 5 OS=Ovis aries OX=9940 GN=Cdk5 PE=2 SV=1	Cdk5	0.0750696	0.323288
RNA helicase OS=Ovis aries OX=9940 GN=DDX31 PE=3 SV=1	DDX31	0.0747228	0.552505
Phosphorylase kinase OS=Ovis aries OX=9940 GN=PHKG2 PE=2 SV=1	PHKG2	0.0740746	0.15725
NAD-dependent protein deacylase sirtuin-5, mitochondrial OS=Ovis aries OX=9940 GN=SIRT5 PE=3 SV=1	SIRT5	0.0738603	0.697975
Uncharacterized protein OS=Ovis aries OX=9940 GN=PRR9 PE=4 SV=1	PRR9	0.0736204	0.512388
3-hydroxyisobutyrate dehydrogenase, mitochondrial OS=Ovis aries OX=9940 PE=3 SV=1		0.0735608	1.38032
Arsenite methyltransferase OS=Ovis aries OX=9940 GN=AS3MT PE=4 SV=1	AS3MT	0.0734189	0.224987
EH domain containing 1 OS=Ovis aries OX=9940 GN=EHD1 PE=4 SV=1	EHD1	0.0731264	1.30613
F-spondin OS=Ovis aries OX=9940 GN=SPON1 PE=4 SV=1	SPON1	0.0727743	0.598307
Wiskott-Aldrich syndrome protein family member OS=Ovis aries OX=9940 GN=WASF2 PE=3 SV=1	WASF2	0.0721649	1.05674
Cingulin like 1 OS=Ovis aries OX=9940 GN=CGNL1 PE=4 SV=1	CGNL1	0.0721402	0.867098
Uncharacterized protein OS=Ovis aries OX=9940 GN=EXOG PE=3 SV=1	EXOG	0.0721104	0.355855
WD_REPEATS_REGION domain-containing protein OS=Ovis aries OX=9940 GN=RRP9 PE=3 SV=1	RRP9	0.072069	0.851972
SH3 domain-containing protein OS=Ovis aries OX=9940 GN=EPS8 PE=3 SV=1	EPS8	0.072061	0.773212
Uncharacterized protein OS=Ovis aries OX=9940 GN=PEF1 PE=4 SV=1	PEF1	0.0718617	0.46664
Uncharacterized protein OS=Ovis aries OX=9940 PE=4 SV=1		0.0718396	1.06512
Uncharacterized protein OS=Ovis aries OX=9940 GN=PDS5A PE=3 SV=1	PDS5A	0.0717183	0.818705
Acyltransferase OS=Ovis aries OX=9940 GN=LOC101110266 PE=3 SV=1	LOC101110266	0.0716843	0.77131
Mitochondrial ribosomal protein L43 OS=Ovis aries OX=9940 GN=MRPL43 PE=3 SV=1	MRPL43	0.0716836	1.22044
Polyhomeotic homolog 2 OS=Ovis aries OX=9940 GN=PHC2 PE=4 SV=1	PHC2	0.0716711	0.18841
Uncharacterized protein OS=Ovis aries OX=9940 GN=ENOPH1 PE=4 SV=1	ENOPH1	0.0715525	0.36001
Adenosine deaminase RNA specific OS=Ovis aries OX=9940 GN=ADAR PE=4 SV=1	ADAR	0.0715079	0.564366
F-BAR domain only protein 2 OS=Ovis aries OX=9940 GN=FCHO2 PE=3 SV=1	FCHO2	0.0713232	0.906924
Uncharacterized protein OS=Ovis aries OX=9940 GN=DNAJA4 PE=3 SV=1	DNAJA4	0.0712545	0.715323
BSD domain containing 1 OS=Ovis aries OX=9940 GN=BSDC1 PE=4 SV=1	BSDC1	0.0711018	0.358364
Sulfurtransferase OS=Ovis aries OX=9940 GN=TST PE=4 SV=1	TST	0.0710355	0.258614
MHC class I region proline-rich protein CAT56 OS=Ovis aries OX=9940 GN=PRR3 PE=4 SV=1	PRR3	0.0710272	0.981506
MHC class I antigen (Fragment) OS=Ovis aries OX=9940 GN=Ovar-I PE=2 SV=1	Ovar-I	0.0710236	0.472046
Nucleolar protein 16 OS=Ovis aries OX=9940 GN=NOP16 PE=3 SV=1	NOP16	0.0708435	0.425104
Uncharacterized protein OS=Ovis aries OX=9940 GN=RAD21 PE=3 SV=1	RAD21	0.0707772	1.33279
Tripartite motif containing 26 OS=Ovis aries OX=9940 GN=TRIM26 PE=4 SV=1	TRIM26	0.0706035	0.48742
Cytochrome P450 family 20 subfamily A member 1 OS=Ovis aries OX=9940 GN=CYP20A1 PE=3 SV=1	CYP20A1	0.0704329	0.553937
Glycogenin 1 OS=Ovis aries OX=9940 GN=GYG1 PE=4 SV=1	GYG1	0.0699588	0.702653
Uncharacterized protein OS=Ovis aries OX=9940 GN=DPT PE=3 SV=1	DPT	0.0699069	0.297331
Uncharacterized protein OS=Ovis aries OX=9940 GN=BCLAF1 PE=3 SV=1	BCLAF1	0.0696394	1.14024
Heparin binding growth factor OS=Ovis aries OX=9940 GN=HDGF PE=4 SV=1	HDGF	0.0696336	1.55433
Integrin_alpha2 domain-containing protein OS=Ovis aries OX=9940 GN=ITGA7 PE=3 SV=1	ITGA7	0.069558	0.978174
PINc domain-containing protein OS=Ovis aries OX=9940 GN=FCF1 PE=4 SV=1	FCF1	0.0695478	0.422858
SMYD family member 5 OS=Ovis aries OX=9940 GN=SMYD5 PE=4 SV=1	SMYD5	0.069489	0.273085
PID domain-containing protein OS=Ovis aries OX=9940 GN=GULP1 PE=4 SV=1	GULP1	0.0693507	0.505769
ISG15 ubiquitin like modifier OS=Ovis aries OX=9940 GN=ISG15 PE=4 SV=1	ISG15	0.0693434	0.43663
Dolichyl-diphosphooligosaccharide--protein glycosyltransferase subunit 2 OS=Ovis aries OX=9940 GN=RPN2 PE=3 SV=1	RPN2	0.0689646	0.340679
SAFB like transcription modulator OS=Ovis aries OX=9940 GN=SLTM PE=4 SV=1	SLTM	0.0689557	0.558192
Egl-9 family hypoxia inducible factor 1 OS=Ovis aries OX=9940 PE=4 SV=1		0.0685194	0.452892
39S ribosomal protein L30, mitochondrial OS=Ovis aries OX=9940 GN=MRPL30 PE=3 SV=1	MRPL30	0.0684107	0.272993
Alpha-mannosidase OS=Ovis aries OX=9940 GN=MAN2A1 PE=3 SV=1	MAN2A1	0.068405	0.684886
Cathepsin L1 OS=Ovis aries OX=9940 GN=CTSL PE=3 SV=1	CTSL	0.0683766	0.242343
AMP-binding domain-containing protein OS=Ovis aries OX=9940 GN=ACSL5 PE=4 SV=1	ACSL5	0.0683674	0.62957
Aldehyde dehydrogenase 1 family member A3 OS=Ovis aries OX=9940 GN=ALDH1A3 PE=3 SV=1	ALDH1A3	0.068313	0.200368
Heme oxygenase (biliverdin-producing) OS=Ovis aries OX=9940 GN=HMOX1 PE=2 SV=1	HMOX1	0.0682959	0.650109
Sulfotransferase OS=Ovis aries OX=9940 GN=LOC101114075 PE=3 SV=1	LOC101114075	0.0681655	0.590679
Coatomer subunit beta' OS=Ovis aries OX=9940 GN=COPB2 PE=3 SV=1	COPB2	0.0681405	0.496364
Replication factor C subunit 5 OS=Ovis aries OX=9940 GN=RFC5 PE=3 SV=1	RFC5	0.0679971	0.662745
Matrilin 4 OS=Ovis aries OX=9940 GN=MATN4 PE=4 SV=1	MATN4	0.0678405	0.343729
3'-phosphoadenosine-5'-phosphosulfate synthase OS=Ovis aries OX=9940 GN=PAPSS1 PE=3 SV=1	PAPSS1	0.0676662	0.348161
Fibroblast growth factor (Fragment) OS=Ovis aries OX=9940 GN=FGF-2 PE=2 SV=1	FGF-2	0.0671588	0.470178
Transcription activation suppressor OS=Ovis aries OX=9940 GN=TASOR PE=3 SV=1	TASOR	0.0669199	0.389256
Uncharacterized protein OS=Ovis aries OX=9940 PE=3 SV=1		0.0669175	0.088739
Protein disulfide-isomerase OS=Ovis aries OX=9940 GN=PDIA4 PE=3 SV=1	PDIA4	0.0669013	0.528978
Uncharacterized protein OS=Ovis aries OX=9940 GN=TRIM2 PE=3 SV=1	TRIM2	0.066835	0.177432
Family with sequence similarity 207 member A OS=Ovis aries OX=9940 GN=FAM207A PE=4 SV=1	FAM207A	0.0667042	0.337868
Uncharacterized protein OS=Ovis aries OX=9940 GN=AKAP8 PE=3 SV=1	AKAP8	0.0666334	0.993301
Apolipoprotein D OS=Ovis aries OX=9940 GN=APOD PE=3 SV=1	APOD	0.0666162	0.314229
Uncharacterized protein OS=Ovis aries OX=9940 GN=MRPL11 PE=3 SV=1	MRPL11	0.0665664	0.44182
Phosphatidylinositol-4-phosphate 3-kinase OS=Ovis aries OX=9940 GN=PIK3C2A PE=3 SV=1	PIK3C2A	0.0664116	0.421024
Uncharacterized protein OS=Ovis aries OX=9940 GN=TPM1 PE=3 SV=1	TPM1	0.0661928	0.826244
Dihydropyrimidinase-related protein 2 OS=Ovis aries OX=9940 GN=DPYSL2 PE=3 SV=1	DPYSL2	0.0661813	0.879241
Adaptor protein, phosphotyrosine interacting with PH domain and leucine zipper 2 OS=Ovis aries OX=9940 GN=APPL2 PE=4 SV=1	APPL2	0.0660309	1.00421
USP1-associated factor 1 OS=Ovis aries OX=9940 GN=WDR48 PE=3 SV=1	WDR48	0.0659318	0.365405
SUZ12 polycomb repressive complex 2 subunit OS=Ovis aries OX=9940 GN=SUZ12 PE=3 SV=1	SUZ12	0.0659013	0.472245
Uncharacterized protein OS=Ovis aries OX=9940 GN=CDV3 PE=3 SV=1	CDV3	0.0658123	0.394687
TLE family member 3, transcriptional corepressor OS=Ovis aries OX=9940 GN=TLE3 PE=3 SV=1	TLE3	0.0657989	0.432222
Prenylcys_lyase domain-containing protein OS=Ovis aries OX=9940 GN=PCYOX1 PE=3 SV=1	PCYOX1	0.0655861	0.699571
Nucleoporin_C domain-containing protein OS=Ovis aries OX=9940 GN=NUP133 PE=3 SV=1	NUP133	0.0655527	1.18564
zf-Tim10_DDP domain-containing protein OS=Ovis aries OX=9940 GN=TIMM10B PE=4 SV=1	TIMM10B	0.0654982	0.547899
Uncharacterized protein OS=Ovis aries OX=9940 GN=TSNAX-DISC1 PE=3 SV=1	TSNAX-DISC1	0.0654659	0.236944
FYVE and coiled-coil domain containing 1 OS=Ovis aries OX=9940 GN=FYCO1 PE=4 SV=1	FYCO1	0.065295	1.58651
Annexin OS=Ovis aries OX=9940 GN=ANXA6 PE=3 SV=1	ANXA6	0.0651369	0.601132
Complement subcomponent C1r OS=Ovis aries OX=9940 GN=C1R PE=4 SV=1	C1R	0.0651041	0.889257
Uncharacterized protein OS=Ovis aries OX=9940 GN=THEM6 PE=4 SV=1	THEM6	0.0649189	0.263312
Uncharacterized protein OS=Ovis aries OX=9940 PE=4 SV=1		0.0643936	0.0964896
NADH dehydrogenase [ubiquinone] 1 beta subcomplex subunit 8, mitochondrial OS=Ovis aries OX=9940 PE=2 SV=1	NDUFB8	0.0641832	0.307674
Peptidyl-prolyl cis-trans isomerase OS=Ovis aries OX=9940 GN=PIN4 PE=3 SV=1	PIN4	0.0639753	0.849461
Clustered mitochondria protein homolog OS=Ovis aries OX=9940 GN=CLUH PE=3 SV=1	CLUH	0.0638679	0.699164
BUD13 homolog OS=Ovis aries OX=9940 GN=BUD13 PE=3 SV=1	BUD13	0.0632631	0.189297
MYB binding protein 1a OS=Ovis aries OX=9940 GN=MYBBP1A PE=3 SV=1	MYBBP1A	0.0632563	0.491929
Uncharacterized protein OS=Ovis aries OX=9940 GN=LRRC17 PE=4 SV=1	LRRC17	0.062993	0.737395
ElaC homolog protein 2 OS=Ovis aries OX=9940 GN=ELAC2 PE=3 SV=1	ELAC2	0.0629012	0.22783
N-acetyltransferase domain-containing protein 1 OS=Ovis aries OX=9940 GN=NATD1 PE=3 SV=1	NATD1	0.0628102	1.79522
Transportin 2 OS=Ovis aries OX=9940 GN=TNPO2 PE=4 SV=1	TNPO2	0.0626927	0.605345
Methylthioribulose-1-phosphate dehydratase OS=Ovis aries OX=9940 GN=APIP PE=3 SV=1	APIP	0.0626851	0.430603
Annexin OS=Ovis aries OX=9940 GN=ANXA4 PE=3 SV=1	ANXA4	0.0625958	0.83712
Uncharacterized protein OS=Ovis aries OX=9940 GN=DCTN4 PE=4 SV=1	DCTN4	0.0625906	0.289913
Gamma-tubulin complex component OS=Ovis aries OX=9940 GN=TUBGCP3 PE=3 SV=1	TUBGCP3	0.0625748	0.331342
EF-hand domain-containing protein OS=Ovis aries OX=9940 PE=4 SV=1	TCHH; LOC101120969	0.0623677	0.465536
UBX domain-containing protein OS=Ovis aries OX=9940 GN=FAF1 PE=4 SV=1	FAF1	0.0622773	0.329563
J kappa-recombination signal-binding protein (Fragment) OS=Ovis aries OX=9940 GN=RBPJ PE=2 SV=1	RBPJ	0.0620087	0.424633
Uncharacterized protein OS=Ovis aries OX=9940 GN=HNRNPH2 PE=4 SV=1	HNRNPH2	0.0619628	0.306462
RAN binding protein 3 OS=Ovis aries OX=9940 GN=RANBP3 PE=4 SV=1	RANBP3	0.061757	0.827217
RAS related 2 OS=Ovis aries OX=9940 GN=RRAS2 PE=4 SV=1	RRAS2	0.0617404	0.458936
EBNA1 binding protein 2 OS=Ovis aries OX=9940 GN=EBNA1BP2 PE=3 SV=1	EBNA1BP2	0.0616311	0.449987
Ribosome biogenesis regulatory protein OS=Ovis aries OX=9940 GN=RRS1 PE=3 SV=1	RRS1	0.0615639	0.461145
Synaptopodin OS=Ovis aries OX=9940 GN=SYNPO PE=4 SV=1	SYNPO	0.0615327	0.393847
Glycolipid transfer protein OS=Ovis aries OX=9940 GN=GLTP PE=4 SV=1	GLTP	0.061268	0.178799
Death domain-containing protein OS=Ovis aries OX=9940 GN=LOC101114909 PE=4 SV=1	LOC101114909	0.0612512	0.194972
Uncharacterized protein OS=Ovis aries OX=9940 PE=4 SV=1		0.0609876	0.518462
Serine and arginine rich splicing factor 4 OS=Ovis aries OX=9940 GN=SRSF4 PE=4 SV=1	SRSF4	0.0609781	1.23279
Aldo_ket_red domain-containing protein OS=Ovis aries OX=9940 GN=LOC101109111 PE=3 SV=1	LOC101109111	0.0609174	0.193249
Translation machinery-associated protein 16 OS=Ovis aries OX=9940 GN=TMA16 PE=3 SV=1	TMA16	0.0602632	0.650956
EF-hand domain-containing protein OS=Ovis aries OX=9940 GN=S100A8 PE=4 SV=1	S100A8	0.0602032	0.258757
Signal recognition particle receptor subunit beta OS=Ovis aries OX=9940 GN=SRPRB PE=3 SV=1	SRPRB	0.0600953	0.483277
Bifunctional lysine-specific demethylase and histidyl-hydroxylase OS=Ovis aries OX=9940 GN=RIOX2 PE=3 SV=1	RIOX2	0.0600638	0.285842
Protein kinase domain-containing protein OS=Ovis aries OX=9940 PE=4 SV=1		0.0600535	0.165145
Follistatin-like protein 1 OS=Ovis aries OX=9940 GN=FSTL1 PE=2 SV=1	FSTL1	0.0596667	0.141146
Elongation factor Ts, mitochondrial OS=Ovis aries OX=9940 GN=TSFM PE=3 SV=1	TSFM	0.0596159	0.266934
Dynamin-1-like protein OS=Ovis aries OX=9940 GN=DNM1L PE=3 SV=1	DNM1L	0.0593558	0.430186
Uncharacterized protein OS=Ovis aries OX=9940 GN=XPO7 PE=3 SV=1	XPO7	0.0593346	0.545041
Serine and arginine rich splicing factor 9 OS=Ovis aries OX=9940 GN=SRSF9 PE=4 SV=1	SRSF9	0.0592701	0.541095
Receptor protein-tyrosine kinase OS=Ovis aries OX=9940 GN=ERBB2 PE=4 SV=1	ERBB2	0.0592425	0.327847
MPN domain-containing protein OS=Ovis aries OX=9940 GN=COPS5 PE=3 SV=1	COPS5	0.0590478	0.376148
Uncharacterized protein OS=Ovis aries OX=9940 GN=RBMS1 PE=4 SV=1	RBMS1	0.0589951	0.674433
Erf4 domain-containing protein OS=Ovis aries OX=9940 GN=GOLGA7 PE=4 SV=1	GOLGA7	0.0586923	0.388703
Uncharacterized protein OS=Ovis aries OX=9940 PE=3 SV=1		0.0586723	0.35443
60 kDa chaperonin OS=Ovis aries OX=9940 PE=3 SV=1		0.0585973	0.423468
DNA helicase OS=Ovis aries OX=9940 GN=MCM4 PE=3 SV=1	MCM4	0.0582097	0.309829
Protein phosphatase, Mg2+/Mn2+ dependent 1J OS=Ovis aries OX=9940 GN=PPM1J PE=4 SV=1	PPM1J	0.0581258	0.287788
CETN2 OS=Ovis aries OX=9940 GN=CETN2 PE=2 SV=1	CETN2	0.0576888	0.216421
Splicing factor proline and glutamine rich OS=Ovis aries OX=9940 GN=SFPQ PE=4 SV=1	SFPQ	0.0575392	0.783666
DRIM domain-containing protein OS=Ovis aries OX=9940 GN=UTP20 PE=4 SV=1	UTP20	0.05676	0.224628
Casein kinase 2 alpha 2 OS=Ovis aries OX=9940 GN=CSNK2A2 PE=3 SV=1	CSNK2A2	0.0567484	0.291644
Galactokinase 1 OS=Ovis aries OX=9940 GN=GALK1 PE=4 SV=1	GALK1	0.0564994	0.301505
Guanine nucleotide-binding protein-like 3 OS=Ovis aries OX=9940 GN=GNL3 PE=4 SV=1	GNL3	0.0563979	0.885393
Uncharacterized protein OS=Ovis aries OX=9940 GN=COA4 PE=4 SV=1	COA4	0.0563484	0.107085
Acyltransferase OS=Ovis aries OX=9940 PE=3 SV=1		0.0561269	0.428841
BTB domain-containing protein OS=Ovis aries OX=9940 GN=KCTD4 PE=4 SV=1	KCTD4	0.0560681	0.365005
Uncharacterized protein OS=Ovis aries OX=9940 PE=4 SV=1		0.0560312	0.177452
CBFD_NFYB_HMF domain-containing protein OS=Ovis aries OX=9940 GN=POLE3 PE=4 SV=1	POLE3	0.05597	0.317833
Phospholipase A2 OS=Ovis aries OX=9940 GN=PLA2G4A PE=4 SV=1	PLA2G4A	0.0559003	0.199835
ADP-ribosylation factor 4 OS=Ovis aries OX=9940 GN=ARF4 PE=2 SV=1	ARF4	0.0558605	0.422697
40S ribosomal protein S3a OS=Ovis aries OX=9940 GN=RPS3A PE=3 SV=1	RPS3A	0.0557812	0.388418
Aly/REF export factor OS=Ovis aries OX=9940 GN=ALYREF PE=4 SV=1	ALYREF	0.0556084	0.697034
EGF containing fibulin extracellular matrix protein 2 OS=Ovis aries OX=9940 GN=EFEMP2 PE=4 SV=1	EFEMP2	0.0555845	1.01944
40S ribosomal protein S30 OS=Ovis aries OX=9940 GN=FAU PE=3 SV=1	FAU	0.0555186	0.47802
MCC regulator of WNT signaling pathway OS=Ovis aries OX=9940 GN=MCC PE=4 SV=1	MCC	0.0555022	0.222126
IF rod domain-containing protein OS=Ovis aries OX=9940 PE=3 SV=1		0.0554864	0.410508
Uncharacterized protein OS=Ovis aries OX=9940 GN=LOC101107153 PE=3 SV=1	LOC101107153	0.0553253	0.0993393
Uncharacterized protein OS=Ovis aries OX=9940 GN=BANF1 PE=4 SV=1	BANF1	0.0553052	0.264932
Ribosomal protein L37 OS=Ovis aries OX=9940 GN=RPL37 PE=3 SV=1	RPL37	0.0552779	0.0936054
Uncharacterized protein OS=Ovis aries OX=9940 GN=SRP9 PE=4 SV=1	SRP9	0.0552421	0.522597
OCIA domain-containing protein OS=Ovis aries OX=9940 GN=OCIAD1 PE=4 SV=1	OCIAD1	0.0551258	0.23582
Stearoyl-CoA 9-desaturase OS=Ovis aries OX=9940 GN=SCD PE=3 SV=1	SCD	0.0550334	0.381296
RRM domain-containing protein OS=Ovis aries OX=9940 GN=EIF4B PE=4 SV=1	EIF4B	0.0546821	0.499709
Coiled-coil domain containing 9 OS=Ovis aries OX=9940 GN=CCDC9 PE=4 SV=1	CCDC9	0.05467	0.275375
Uncharacterized protein OS=Ovis aries OX=9940 GN=C6H4orf3 PE=4 SV=1	C6H4orf3	0.0546559	0.202197
Sp1 transcription factor OS=Ovis aries OX=9940 GN=SP1 PE=4 SV=1	SP1	0.0545627	0.157318
Cysteine protease OS=Ovis aries OX=9940 GN=ATG4B PE=3 SV=1	ATG4B	0.0544205	0.504414
G protein subunit alpha 13 OS=Ovis aries OX=9940 GN=GNA13 PE=3 SV=1	GNA13	0.0539354	0.537025
U1 small nuclear ribonucleoprotein 70 kDa OS=Ovis aries OX=9940 GN=SNRNP70 PE=4 SV=1	SNRNP70	0.0537099	0.972267
AB hydrolase-1 domain-containing protein OS=Ovis aries OX=9940 GN=ABHD11 PE=4 SV=1	ABHD11	0.0536455	0.305701
RNA helicase OS=Ovis aries OX=9940 GN=DHX30 PE=4 SV=1	DHX30	0.0532064	0.269251
Uncharacterized protein OS=Ovis aries OX=9940 GN=ZNF512 PE=4 SV=1	ZNF512	0.0531423	0.335176
Uncharacterized protein OS=Ovis aries OX=9940 GN=FRG1 PE=3 SV=1	FRG1	0.0530651	0.433172
RNA-binding protein 8A OS=Ovis aries OX=9940 GN=RBM8A PE=3 SV=1	RBM8A	0.05289	0.502432
Peptidylprolyl isomerase OS=Ovis aries OX=9940 GN=FKBP3 PE=4 SV=1	FKBP3	0.0528756	1.13675
Polyglutamine tract-binding protein 1 OS=Ovis aries OX=9940 GN=PQBP1 PE=4 SV=1	PQBP1	0.0527794	0.268282
Ubiquitin-like domain-containing protein OS=Ovis aries OX=9940 GN=TMUB1 PE=4 SV=1	TMUB1	0.0526958	0.242445
Mitochondrial ribosomal protein L37 OS=Ovis aries OX=9940 GN=MRPL37 PE=4 SV=1	MRPL37	0.0524895	0.509643
UMP-CMP kinase OS=Ovis aries OX=9940 GN=CMPK1 PE=3 SV=1	CMPK1	0.0523732	0.280949
PH domain-containing protein OS=Ovis aries OX=9940 GN=GAB1 PE=4 SV=1	GAB1	0.0523075	0.296805
Peptidylprolyl isomerase OS=Ovis aries OX=9940 GN=FKBP11 PE=4 SV=1	FKBP11	0.0519438	0.281283
PHD and ring finger domains 1 OS=Ovis aries OX=9940 GN=PHRF1 PE=4 SV=1	PHRF1	0.051917	0.283856
ArfGAP with FG repeats 1 OS=Ovis aries OX=9940 GN=AGFG1 PE=4 SV=1	AGFG1	0.05183	0.284208
Heat shock protein 90 beta family member 1 OS=Ovis aries OX=9940 GN=HSP90B1 PE=3 SV=1	HSP90B1	0.0518095	0.454706
Acylphosphatase OS=Ovis aries OX=9940 PE=3 SV=1		0.051692	0.406332
Nucleoprotein TPR OS=Ovis aries OX=9940 GN=TPR PE=3 SV=1	TPR	0.0516137	1.05195
Uncharacterized protein OS=Ovis aries OX=9940 GN=TRIAP1 PE=3 SV=1	TRIAP1	0.0513791	0.281069
Sorting nexin 27 OS=Ovis aries OX=9940 GN=SNX27 PE=4 SV=1	SNX27	0.0510377	0.398966
Small ubiquitin-related modifier OS=Ovis aries OX=9940 PE=3 SV=1		0.051008	0.573232
Transformer 2 beta homolog OS=Ovis aries OX=9940 GN=TRA2B PE=4 SV=1	TRA2B	0.050354	0.527186
Poly(A) polymerase OS=Ovis aries OX=9940 GN=PAPOLA PE=3 SV=1	PAPOLA	0.0503354	0.34549
E3 ubiquitin protein ligase OS=Ovis aries OX=9940 GN=RNF40 PE=3 SV=1	RNF40	0.050097	0.264388
Lysozyme g-like protein OS=Ovis aries OX=9940 GN=LYG2 PE=3 SV=1	LYG2	0.0500894	0.409008
Uncharacterized protein OS=Ovis aries OX=9940 GN=NID2 PE=4 SV=1	NID2	0.0495737	0.728691
FABP domain-containing protein OS=Ovis aries OX=9940 GN=FABP3 PE=3 SV=1	FABP3	0.0493819	0.143872
Uncharacterized protein OS=Ovis aries OX=9940 GN=LAMP2 PE=3 SV=1	LAMP2	0.0493386	0.498382
THO complex subunit 7 homolog OS=Ovis aries OX=9940 GN=THOC7 PE=3 SV=1	THOC7	0.0493006	0.351789
Huntingtin interacting protein K OS=Ovis aries OX=9940 GN=HYPK PE=4 SV=1	HYPK	0.0492399	0.198625
BCL2 associated athanogene 5 OS=Ovis aries OX=9940 GN=BAG5 PE=4 SV=1	BAG5	0.0488762	0.639395
AIR carboxylase OS=Ovis aries OX=9940 PE=3 SV=1		0.0487433	0.197608
Beta-MPP OS=Ovis aries OX=9940 GN=PMPCB PE=3 SV=1	PMPCB	0.0486525	0.120077
ELAV-like protein OS=Ovis aries OX=9940 GN=ELAVL1 PE=3 SV=1	ELAVL1	0.0483793	0.582586
Uncharacterized protein OS=Ovis aries OX=9940 GN=SLC12A2 PE=3 SV=1	SLC12A2	0.0483301	0.329886
Serine/threonine kinase 39 OS=Ovis aries OX=9940 GN=STK39 PE=4 SV=1	STK39	0.0481047	0.0958566
Activating signal cointegrator 1 complex subunit 3 OS=Ovis aries OX=9940 GN=ASCC3 PE=3 SV=1	ASCC3	0.0473783	0.22985
U1-type domain-containing protein OS=Ovis aries OX=9940 GN=ZMAT2 PE=4 SV=1	ZMAT2	0.0472217	0.672029
Integrin beta (Fragment) OS=Ovis aries OX=9940 PE=2 SV=1	ITGB3	0.0470218	0.276048
Ubiquitin carboxyl-terminal hydrolase OS=Ovis aries OX=9940 GN=USP4 PE=3 SV=1	USP4	0.0468939	0.364669
Uncharacterized protein OS=Ovis aries OX=9940 GN=DUSP14 PE=3 SV=1	DUSP14	0.0465871	0.491777
1,2-dihydroxy-3-keto-5-methylthiopentene dioxygenase OS=Ovis aries OX=9940 GN=ADI1 PE=3 SV=1	ADI1	0.0464282	0.259342
DNA-directed RNA polymerases I, II, and III subunit RPABC3 OS=Ovis aries OX=9940 GN=POLR2H PE=3 SV=1	POLR2H	0.0462895	0.840792
2-oxoglutarate and iron-dependent oxygenase domain-containing protein 1 OS=Ovis aries OX=9940 GN=OGFOD1 PE=3 SV=1	OGFOD1	0.0462663	0.760603
rRNA adenine N(6)-methyltransferase OS=Ovis aries OX=9940 GN=DIMT1 PE=3 SV=1	DIMT1	0.0462004	0.327143
Uncharacterized protein OS=Ovis aries OX=9940 GN=ESAM PE=4 SV=1	ESAM	0.0460692	0.193394
Uncharacterized protein OS=Ovis aries OX=9940 GN=LRRC57 PE=4 SV=1	LRRC57	0.0459934	0.792505
Zinc-hook domain-containing protein OS=Ovis aries OX=9940 GN=RAD50 PE=3 SV=1	RAD50	0.0458295	0.610452
Asparagine synthetase [glutamine-hydrolyzing] OS=Ovis aries OX=9940 GN=ASNS PE=4 SV=1	ASNS	0.0456664	0.44599
tRNA methyltransferase 1 OS=Ovis aries OX=9940 GN=TRMT1 PE=3 SV=1	TRMT1	0.0455972	0.180348
YTH domain-containing protein OS=Ovis aries OX=9940 GN=YTHDC1 PE=4 SV=1	YTHDC1	0.0455248	0.80737
Angio associated migratory cell protein OS=Ovis aries OX=9940 GN=AAMP PE=4 SV=1	AAMP	0.0453275	0.333626
Uncharacterized protein OS=Ovis aries OX=9940 GN=SLC25A13 PE=3 SV=1	SLC25A13	0.0451081	0.408508
Uncharacterized protein OS=Ovis aries OX=9940 GN=PHYHD1 PE=4 SV=1	PHYHD1	0.0450535	0.220603
Microfibril associated protein 4 OS=Ovis aries OX=9940 GN=MFAP4 PE=4 SV=1	MFAP4	0.0449515	0.257537
RRM domain-containing protein OS=Ovis aries OX=9940 GN=RBMX PE=4 SV=1	RBMX	0.0446625	0.184459
RNA helicase OS=Ovis aries OX=9940 GN=DDX18 PE=3 SV=1	DDX18	0.0445781	0.359516
Uncharacterized protein OS=Ovis aries OX=9940 GN=FCHSD1 PE=4 SV=1	FCHSD1	0.0445349	0.0391588
Uncharacterized protein OS=Ovis aries OX=9940 GN=MANF PE=3 SV=1	MANF	0.0443749	0.257066
Eukaryotic translation initiation factor 5A OS=Ovis aries OX=9940 GN=EIF5A PE=3 SV=1	EIF5A	0.0440036	0.218728
Uncharacterized protein OS=Ovis aries OX=9940 PE=3 SV=1	LOC101119447	0.0439616	0.0909889
Ras suppressor protein 1 OS=Ovis aries OX=9940 GN=RSU1 PE=2 SV=1	RSU1	0.0437606	0.449235
Uncharacterized protein OS=Ovis aries OX=9940 GN=LOC101117129 PE=3 SV=1	LOC101117129	0.0432309	0.213027
CCCTC-binding factor OS=Ovis aries OX=9940 GN=CTCF PE=4 SV=1	CTCF	0.0432199	0.235765
BRCA2 and CDKN1A-interacting protein OS=Ovis aries OX=9940 GN=BCCIP PE=3 SV=1	BCCIP	0.0430326	0.182094
CAP10 domain-containing protein OS=Ovis aries OX=9940 GN=POGLUT1 PE=4 SV=1	POGLUT1	0.0429059	0.524477
Uncharacterized protein OS=Ovis aries OX=9940 GN=NELFCD PE=3 SV=1	NELFCD	0.0428589	0.443522
Nuclear factor 1 OS=Ovis aries OX=9940 GN=NFIC PE=3 SV=1	NFIC	0.042752	0.352769
PEST proteolytic signal-containing nuclear protein OS=Ovis aries OX=9940 PE=4 SV=1		0.0427289	0.381169
Peptide-O-fucosyltransferase OS=Ovis aries OX=9940 GN=POFUT2 PE=4 SV=1	POFUT2	0.0426456	0.196732
Uncharacterized protein OS=Ovis aries OX=9940 GN=RANBP2 PE=4 SV=1	RANBP2	0.0426424	0.477891
N-acetyltransferase domain-containing protein OS=Ovis aries OX=9940 GN=SAT2 PE=4 SV=1	SAT2	0.0425022	0.203743
Beta 3-glucosyltransferase OS=Ovis aries OX=9940 GN=B3GLCT PE=4 SV=1	B3GLCT	0.0424495	0.200432
Large 60S subunit nuclear export GTPase 1 OS=Ovis aries OX=9940 GN=LSG1 PE=4 SV=1	LSG1	0.0405161	0.185728
Complex I subunit B13 OS=Ovis aries OX=9940 GN=NDUFA5 PE=1 SV=1	NDUFA5	0.0404488	0.343022
60S ribosomal protein L9 OS=Ovis aries OX=9940 PE=3 SV=1	LOC101115015	0.0402312	0.276476
STAM binding protein OS=Ovis aries OX=9940 GN=STAMBP PE=3 SV=1	STAMBP	0.0401416	0.12381
AA_TRNA_LIGASE_II_ALA domain-containing protein OS=Ovis aries OX=9940 GN=LOC101107295 PE=3 SV=1	LOC101107295	0.0400606	0.136942
F5/8 type C domain-containing protein OS=Ovis aries OX=9940 GN=CPXM1 PE=3 SV=1	CPXM1	0.0400042	0.219994
Nucleobindin-1 OS=Ovis aries OX=9940 GN=NUCB1 PE=3 SV=1	NUCB1	0.0399753	0.15406
RNA helicase OS=Ovis aries OX=9940 GN=DDX23 PE=4 SV=1	DDX23	0.0398125	0.191087
FIP1-like 1 protein OS=Ovis aries OX=9940 PE=3 SV=1		0.0396414	0.206051
Uncharacterized protein OS=Ovis aries OX=9940 GN=EHD3 PE=4 SV=1	EHD3	0.0395454	0.385041
Protein kinase domain-containing protein OS=Ovis aries OX=9940 GN=MAP3K20 PE=4 SV=1	MAP3K20	0.0393138	0.490512
IF rod domain-containing protein OS=Ovis aries OX=9940 GN=KRT7 PE=3 SV=1	KRT7	0.0390529	0.184444
Protein kinase domain-containing protein OS=Ovis aries OX=9940 GN=NEK9 PE=3 SV=1	NEK9	0.0389836	0.659558
Cytochrome b-c1 complex subunit 7 OS=Ovis aries OX=9940 GN=UQCRB PE=1 SV=1	UQCRB	0.0389089	0.524104
Uncharacterized protein OS=Ovis aries OX=9940 GN=EXOSC4 PE=4 SV=1	EXOSC4	0.038613	0.1864
HRDC domain-containing protein OS=Ovis aries OX=9940 GN=EXOSC10 PE=4 SV=1	EXOSC10	0.03855	0.423785
Clathrin light chain OS=Ovis aries OX=9940 GN=CLTA PE=3 SV=1	CLTA	0.0380429	0.476961
Cytoplasmic tRNA 2-thiolation protein 2 OS=Ovis aries OX=9940 GN=CTU2 PE=3 SV=1	CTU2	0.0379986	0.172327
DNA replication licensing factor MCM2 OS=Ovis aries OX=9940 PE=3 SV=1		0.0379466	0.190043
Uncharacterized protein OS=Ovis aries OX=9940 GN=TOMM40 PE=3 SV=1	TOMM40	0.0376723	0.280141
MICOS complex subunit OS=Ovis aries OX=9940 GN=APOOL PE=3 SV=1	APOOL	0.0374207	0.650521
MLLT1 super elongation complex subunit OS=Ovis aries OX=9940 GN=MLLT1 PE=4 SV=1	MLLT1	0.0373341	0.0558135
Integrator complex subunit 12 OS=Ovis aries OX=9940 GN=INTS12 PE=3 SV=1	INTS12	0.0372372	0.164109
Uncharacterized protein OS=Ovis aries OX=9940 GN=FRRS1 PE=3 SV=1	FRRS1	0.0371669	0.0978372
FERM domain containing 8 OS=Ovis aries OX=9940 GN=FRMD8 PE=4 SV=1	FRMD8	0.0371506	0.11773
Spliceosome associated factor 3, U4/U6 recycling protein OS=Ovis aries OX=9940 GN=SART3 PE=4 SV=1	SART3	0.0371496	0.790627
Core histone macro-H2A OS=Ovis aries OX=9940 GN=MACROH2A2 PE=4 SV=1	MACROH2A2	0.0369975	0.209418
Coatomer protein complex subunit gamma 2 (Fragment) OS=Ovis aries OX=9940 PE=2 SV=1	LOC780443; COPG1	0.036987	0.390931
Thioredoxin-disulfide reductase OS=Ovis aries OX=9940 GN=TXNRD2 PE=3 SV=1	TXNRD2	0.0369142	0.276595
Uncharacterized protein OS=Ovis aries OX=9940 PE=3 SV=1		0.0368869	0.171161
Peptidylprolyl isomerase OS=Ovis aries OX=9940 GN=FKBP9 PE=4 SV=1	FKBP9	0.0366177	0.192478
Seryl-tRNA synthetase OS=Ovis aries OX=9940 PE=3 SV=1		0.0362958	0.278725
Uncharacterized protein OS=Ovis aries OX=9940 GN=WLS PE=3 SV=1	WLS	0.0362663	0.182098
Structural maintenance of chromosomes protein OS=Ovis aries OX=9940 GN=SMC3 PE=3 SV=1	SMC3	0.0360528	0.763711
FIG4 phosphoinositide 5-phosphatase OS=Ovis aries OX=9940 GN=FIG4 PE=4 SV=1	FIG4	0.0360464	0.151289
UDP-glucose 6-dehydrogenase OS=Ovis aries OX=9940 GN=UGDH PE=3 SV=1	UGDH	0.0355814	0.21276
Citrate synthase OS=Ovis aries OX=9940 GN=CS PE=3 SV=1	CS	0.0354932	0.243849
W2 domain-containing protein OS=Ovis aries OX=9940 GN=BZW1 PE=3 SV=1	BZW1	0.0354791	0.276401
Hydrolase_4 domain-containing protein OS=Ovis aries OX=9940 GN=MGLL PE=4 SV=1	MGLL	0.0354165	0.309952
Uncharacterized protein OS=Ovis aries OX=9940 PE=4 SV=1		0.0351429	0.309664
3-ketodihydrosphingosine reductase OS=Ovis aries OX=9940 GN=KDSR PE=3 SV=1	KDSR	0.0349256	0.312399
PIPK domain-containing protein OS=Ovis aries OX=9940 GN=PIP4K2A PE=4 SV=1	PIP4K2A	0.0344709	0.148989
Uncharacterized protein OS=Ovis aries OX=9940 GN=PECAM1 PE=4 SV=1	PECAM1	0.0343644	0.28712
Galectin-1 OS=Ovis aries OX=9940 GN=LGALS1 PE=1 SV=2	LGALS1	0.0343028	0.169885
PHD finger protein 2 OS=Ovis aries OX=9940 GN=PHF2 PE=4 SV=1	PHF2	0.0339579	0.368714
Phosphorylated adapter RNA export protein OS=Ovis aries OX=9940 GN=PHAX PE=3 SV=1	PHAX	0.0338532	0.69532
Mitochondrial import inner membrane translocase subunit TIM44 OS=Ovis aries OX=9940 GN=TIMM44 PE=3 SV=1	TIMM44	0.0336845	0.138383
RPOL4c domain-containing protein OS=Ovis aries OX=9940 GN=POLR2D PE=4 SV=1	POLR2D	0.0334569	0.154093
B30.2/SPRY domain-containing protein OS=Ovis aries OX=9940 GN=SPRYD4 PE=4 SV=1	SPRYD4	0.0334035	0.304615
Leucine-rich repeat and WD repeat-containing protein 1 OS=Ovis aries OX=9940 GN=LRWD1 PE=3 SV=1	LRWD1	0.033381	0.246559
Fibulin-1 OS=Ovis aries OX=9940 GN=FBLN1 PE=3 SV=1	FBLN1	0.0332866	0.227403
Uncharacterized protein OS=Ovis aries OX=9940 GN=TERF2IP PE=4 SV=1	TERF2IP	0.0332563	0.331453
Chromodomain Y like OS=Ovis aries OX=9940 GN=CDYL PE=4 SV=1	CDYL	0.0332418	0.161644
A-kinase anchoring protein 12 OS=Ovis aries OX=9940 GN=AKAP12 PE=4 SV=1	AKAP12	0.0328583	0.317568
EF-hand domain family member D1 OS=Ovis aries OX=9940 GN=EFHD1 PE=4 SV=1	EFHD1	0.0327375	0.0926931
Uncharacterized protein OS=Ovis aries OX=9940 GN=SNRNP200 PE=3 SV=1	SNRNP200	0.0326756	0.31366
Deoxyhypusine hydroxylase OS=Ovis aries OX=9940 GN=DOHH PE=3 SV=1	DOHH	0.0325644	0.146953
WD repeat domain 46 OS=Ovis aries OX=9940 GN=WDR46 PE=4 SV=1	WDR46	0.0325391	0.244659
Beta-sarcoglycan OS=Ovis aries OX=9940 GN=SGCB PE=3 SV=1	SGCB	0.0325267	0.200003
Coproporphyrinogen oxidase OS=Ovis aries OX=9940 GN=CPOX PE=3 SV=1	CPOX	0.0324021	0.172653
C2H2-type domain-containing protein OS=Ovis aries OX=9940 GN=CHAMP1 PE=4 SV=1	CHAMP1	0.0323869	0.511524
UBX domain-containing protein OS=Ovis aries OX=9940 GN=FAF2 PE=4 SV=1	FAF2	0.0323516	0.235538
Pre-mRNA-processing factor 31 OS=Ovis aries OX=9940 GN=PRPF31 PE=3 SV=1	PRPF31	0.0321812	0.13639
Complex I-B22 OS=Ovis aries OX=9940 GN=NDUFB9 PE=1 SV=1	NDUFB9	0.0321668	0.0761721
Caldesmon 1 OS=Ovis aries OX=9940 GN=CALD1 PE=4 SV=1	CALD1	0.0320631	0.272145
Succinate dehydrogenase [ubiquinone] flavoprotein subunit, mitochondrial OS=Ovis aries OX=9940 PE=3 SV=1		0.0319002	0.639921
Ankyrin repeat and LEM domain containing 2 OS=Ovis aries OX=9940 GN=ANKLE2 PE=3 SV=1	ANKLE2	0.0318661	0.205626
Apolipoprotein C-II OS=Ovis aries OX=9940 GN=APOC2 PE=3 SV=1	APOC2	0.0318262	0.168108
Uncharacterized protein OS=Ovis aries OX=9940 GN=UBQLN2 PE=4 SV=1	UBQLN2	0.0318108	0.0955015
General transcription factor TFIIB OS=Ovis aries OX=9940 GN=GTF2B PE=3 SV=1	GTF2B	0.0317943	0.236451
DnaJ homolog subfamily C member 10 OS=Ovis aries OX=9940 GN=DNAJC10 PE=4 SV=1	DNAJC10	0.0317659	0.20754
Diadenosine tetraphosphate synthetase OS=Ovis aries OX=9940 GN=GARS1 PE=3 SV=1	GARS1	0.0317146	0.155462
Golgin subfamily A member 5 OS=Ovis aries OX=9940 GN=GOLGA5 PE=4 SV=1	GOLGA5	0.0317108	0.232291
Uncharacterized protein OS=Ovis aries OX=9940 GN=MIEN1 PE=4 SV=1	MIEN1	0.0316463	0.141611
Uncharacterized protein OS=Ovis aries OX=9940 GN=ARHGDIA PE=3 SV=1	ARHGDIA	0.0315452	0.132072
NADH-cytochrome b5 reductase OS=Ovis aries OX=9940 GN=CYB5R3 PE=3 SV=1	CYB5R3	0.0312885	0.280935
Proliferating cell nuclear antigen OS=Ovis aries OX=9940 GN=PCNA PE=3 SV=1	PCNA	0.031214	0.151005
Alanine--tRNA ligase OS=Ovis aries OX=9940 GN=AARS2 PE=3 SV=1	AARS2	0.0311623	0.153516
AP-2 complex subunit mu OS=Ovis aries OX=9940 GN=AP2M1 PE=3 SV=1	AP2M1	0.0311253	0.244111
Malignant T-cell-amplified sequence OS=Ovis aries OX=9940 GN=LOC101111215 PE=3 SV=1	LOC101111215	0.0309312	0.603416
D-aminoacyl-tRNA deacylase OS=Ovis aries OX=9940 PE=3 SV=1	DTD1	0.0307872	0.213446
40S ribosomal protein S15 OS=Ovis aries OX=9940 PE=3 SV=1		0.0307612	0.0686463
Uncharacterized protein OS=Ovis aries OX=9940 PE=4 SV=1		0.0304265	0.229048
Protein S100 OS=Ovis aries OX=9940 GN=S100A1 PE=3 SV=1	S100A1	0.0304057	0.20785
Eukaryotic translation elongation factor 2 OS=Ovis aries OX=9940 GN=EEF2 PE=3 SV=1	EEF2	0.0303092	0.231155
WD_REPEATS_REGION domain-containing protein OS=Ovis aries OX=9940 PE=4 SV=1		0.0302568	0.185067
La ribonucleoprotein 4B OS=Ovis aries OX=9940 GN=LARP4B PE=4 SV=1	LARP4B	0.0301987	0.311227
High mobility group nucleosome-binding domain-containing protein 3 OS=Ovis aries OX=9940 GN=HMGN3 PE=3 SV=1	HMGN3	0.0300851	0.113181
Uncharacterized protein OS=Ovis aries OX=9940 GN=PSME4 PE=3 SV=1	PSME4	0.0300412	0.108104
Protein tyrosine kinase 7 (inactive) OS=Ovis aries OX=9940 GN=PTK7 PE=3 SV=1	PTK7	0.0297464	0.412371
Uncharacterized protein OS=Ovis aries OX=9940 PE=4 SV=1		0.0296474	0.164762
Uncharacterized protein OS=Ovis aries OX=9940 PE=4 SV=1		0.0292023	0.0922781
CCR4-NOT transcription complex subunit 9 OS=Ovis aries OX=9940 GN=CNOT9 PE=3 SV=1	CNOT9	0.02919	0.254442
Uncharacterized protein OS=Ovis aries OX=9940 GN=ZC3H11A PE=4 SV=1	ZC3H11A	0.029158	0.205842
Cytochrome b reductase 1 OS=Ovis aries OX=9940 GN=CYBRD1 PE=4 SV=1	CYBRD1	0.029137	0.0383821
Uncharacterized protein OS=Ovis aries OX=9940 PE=3 SV=1		0.0290748	0.324625
DnaJ heat shock protein family (Hsp40) member C9 OS=Ovis aries OX=9940 GN=DNAJC9 PE=4 SV=1	DNAJC9	0.0290317	0.208598
Malic enzyme OS=Ovis aries OX=9940 GN=ME2 PE=3 SV=1	ME2	0.0283337	0.296288
RNA binding motif protein 4B OS=Ovis aries OX=9940 GN=RBM4B PE=4 SV=1	RBM4B	0.0281906	0.223414
RNA helicase OS=Ovis aries OX=9940 GN=DDX21 PE=3 SV=1	DDX21	0.028046	0.249062
Phosphoglycerate mutase OS=Ovis aries OX=9940 GN=BPGM PE=3 SV=1	BPGM	0.0279824	0.101067
Uncharacterized protein OS=Ovis aries OX=9940 GN=UBXN1 PE=4 SV=1	UBXN1	0.0279503	0.2153
Nuclear factor 1 OS=Ovis aries OX=9940 GN=NFIX PE=3 SV=1	NFIX	0.0278634	0.39479
DNA topoisomerase 2 OS=Ovis aries OX=9940 GN=TOP2A PE=3 SV=1	TOP2A	0.0276611	0.0612426
40S ribosomal protein S27 OS=Ovis aries OX=9940 GN=RPS27L PE=3 SV=1	RPS27L	0.0276019	0.208546
Uncharacterized protein OS=Ovis aries OX=9940 GN=FXR1 PE=3 SV=1	FXR1	0.0273632	0.20638
Serpin family A member 12 OS=Ovis aries OX=9940 GN=SERPINA12 PE=3 SV=1	SERPINA12	0.0273158	0.273571
Uncharacterized protein OS=Ovis aries OX=9940 GN=PDXDC1 PE=4 SV=1	PDXDC1	0.0273082	0.135623
Nuclear pore complex protein Nup96 OS=Ovis aries OX=9940 GN=NUP98 PE=3 SV=1	NUP98	0.0272426	0.284121
IF rod domain-containing protein OS=Ovis aries OX=9940 GN=KRT23 PE=3 SV=1	KRT23	0.0272194	0.255253
Coatomer subunit beta OS=Ovis aries OX=9940 GN=COPB1 PE=4 SV=1	COPB1	0.0271288	0.125665
Neuropilin OS=Ovis aries OX=9940 GN=NRP2 PE=3 SV=1	NRP2	0.0270759	0.085652
Glutamine amidotransferase OS=Ovis aries OX=9940 GN=GMPS PE=4 SV=1	GMPS	0.0270173	0.157181
Complex III subunit 8 OS=Ovis aries OX=9940 GN=UQCRQ PE=1 SV=1	UQCRQ	0.026898	0.188903
Uncharacterized protein OS=Ovis aries OX=9940 GN=ENSA PE=3 SV=1	ENSA	0.0268833	0.179394
Uncharacterized protein OS=Ovis aries OX=9940 GN=FUBP1 PE=4 SV=1	FUBP1	0.0268147	0.699998
Cytochrome c oxidase subunit OS=Ovis aries OX=9940 GN=COX6B1 PE=1 SV=1	COX6B1	0.0267951	0.381271
I-kappa-B kinase OS=Ovis aries OX=9940 GN=IKBKB PE=4 SV=1	IKBKB	0.026422	0.124395
H/ACA ribonucleoprotein complex subunit OS=Ovis aries OX=9940 GN=GAR1 PE=3 SV=1	GAR1	0.0263485	0.200345
Transaldolase (Fragment) OS=Ovis aries OX=9940 PE=2 SV=1	TALDO1	0.0262189	0.147213
U4/U6.U5 small nuclear ribonucleoprotein 27 kDa protein OS=Ovis aries OX=9940 PE=3 SV=1		0.0260958	0.280447
Collagen type XVI alpha 1 chain OS=Ovis aries OX=9940 GN=COL16A1 PE=4 SV=1	COL16A1	0.025858	0.207097
SR-related CTD associated factor 11 OS=Ovis aries OX=9940 GN=SCAF11 PE=4 SV=1	SCAF11	0.0257015	0.466706
Arpin OS=Ovis aries OX=9940 GN=LOC101105107 PE=3 SV=1	LOC101105107	0.025543	0.0704967
Cysteine-S-conjugate beta-lyase 2 OS=Ovis aries OX=9940 GN=KYAT3 PE=4 SV=1	KYAT3	0.0253721	0.129188
Histone PARylation factor 1 OS=Ovis aries OX=9940 GN=HPF1 PE=3 SV=1	HPF1	0.024663	0.167131
TMEM9 domain family member B OS=Ovis aries OX=9940 GN=TMEM9B PE=3 SV=1	TMEM9B	0.024285	0.145549
Tripartite motif containing 28 OS=Ovis aries OX=9940 GN=TRIM28 PE=4 SV=1	TRIM28	0.0241723	1.07183
Uncharacterized protein OS=Ovis aries OX=9940 GN=IFIT1 PE=4 SV=1	IFIT1	0.0240543	0.115952
CHCH domain-containing protein OS=Ovis aries OX=9940 GN=CHCHD4 PE=4 SV=1	CHCHD4	0.0236868	0.0973099
PRP19/PSO4 homolog OS=Ovis aries OX=9940 GN=PRPF19 PE=3 SV=1	PRPF19	0.0234804	0.118451
Uncharacterized protein OS=Ovis aries OX=9940 GN=MBOAT2 PE=4 SV=1	MBOAT2	0.0234773	0.149756
40S ribosomal protein S11 OS=Ovis aries OX=9940 GN=RPS11 PE=3 SV=1	RPS11	0.0233963	0.221485
60S ribosomal protein L13 OS=Ovis aries OX=9940 PE=3 SV=1		0.0231861	0.113396
Leucyl-tRNA synthetase OS=Ovis aries OX=9940 GN=LARS2 PE=3 SV=1	LARS2	0.0230598	0.153976
Signal transducer and activator of transcription OS=Ovis aries OX=9940 GN=STAT1 PE=2 SV=1	STAT1	0.0230006	0.125538
TATA-box binding protein associated factor 4 OS=Ovis aries OX=9940 GN=TAF4 PE=3 SV=1	TAF4	0.0229416	0.176235
Myosin_tail_1 domain-containing protein OS=Ovis aries OX=9940 GN=CGN PE=4 SV=1	CGN	0.0228256	0.0950483
Uncharacterized protein OS=Ovis aries OX=9940 PE=4 SV=1		0.0226279	0.152604
Eukaryotic translation initiation factor 4 gamma 3 OS=Ovis aries OX=9940 GN=EIF4G3 PE=3 SV=1	EIF4G3	0.0226263	0.0856739
PDZ domain-containing protein OS=Ovis aries OX=9940 PE=4 SV=1		0.0225507	0.109223
Uncharacterized protein OS=Ovis aries OX=9940 GN=GOLGB1 PE=4 SV=1	GOLGB1	0.0225085	0.147763
D-3-phosphoglycerate dehydrogenase OS=Ovis aries OX=9940 GN=PHGDH PE=3 SV=1	PHGDH	0.0224317	0.1318
Sperm-associated antigen 7 OS=Ovis aries OX=9940 GN=SPAG7 PE=4 SV=1	SPAG7	0.0223692	0.132485
Ubiquitin like 4A OS=Ovis aries OX=9940 GN=UBL4A PE=4 SV=1	UBL4A	0.0221698	0.148622
Annexin OS=Ovis aries OX=9940 PE=3 SV=1		0.0221254	0.202832
Signal peptidase complex subunit 3 OS=Ovis aries OX=9940 GN=SPCS3 PE=3 SV=1	SPCS3	0.0219924	0.15726
Uncharacterized protein OS=Ovis aries OX=9940 GN=CENPF PE=4 SV=1	CENPF	0.0218959	0.0356572
Uncharacterized protein OS=Ovis aries OX=9940 PE=3 SV=1		0.0217667	0.351119
Uncharacterized protein OS=Ovis aries OX=9940 GN=GTF2A1 PE=3 SV=1	GTF2A1	0.0217053	0.173443
40S ribosomal protein S3a OS=Ovis aries OX=9940 GN=RPS3A PE=3 SV=1	RPS3A	0.021658	0.0701092
Epididymal secretory protein E1 OS=Ovis aries OX=9940 GN=NPC2 PE=3 SV=1	NPC2	0.0216229	0.191556
DNA-(apurinic or apyrimidinic site) endonuclease OS=Ovis aries OX=9940 GN=APEX1 PE=3 SV=1	APEX1	0.0215732	0.132009
Uncharacterized protein OS=Ovis aries OX=9940 GN=DIS3 PE=3 SV=1	DIS3	0.021371	0.15332
Uncharacterized protein OS=Ovis aries OX=9940 GN=NUP54 PE=4 SV=1	NUP54	0.0213259	0.235886
75 kDa glucose-regulated protein OS=Ovis aries OX=9940 GN=HSPA9 PE=3 SV=1	HSPA9	0.0213036	0.274771
U6 small nuclear RNA (adenine-(43)-N(6))-methyltransferase OS=Ovis aries OX=9940 GN=METTL16 PE=3 SV=1	METTL16	0.0211511	0.0960063
Zinc finger CCCH domain-containing protein 14 OS=Ovis aries OX=9940 GN=ZC3H14 PE=3 SV=1	ZC3H14	0.0210688	0.181985
Uncharacterized protein OS=Ovis aries OX=9940 GN=WBP11 PE=4 SV=1	WBP11	0.0209776	0.10028
Huntingtin interacting protein 1 related OS=Ovis aries OX=9940 GN=HIP1R PE=3 SV=1	HIP1R	0.0209457	0.0999309
Nuclease sensitive element binding protein 1 OS=Ovis aries OX=9940 GN=NSEP1 PE=2 SV=1	NSEP1	0.0209324	0.0771651
Uncharacterized protein OS=Ovis aries OX=9940 GN=SYNCRIP PE=4 SV=1	SYNCRIP	0.0208778	0.150957
Uncharacterized protein OS=Ovis aries OX=9940 PE=4 SV=1		0.0208139	0.0963152
Uncharacterized protein OS=Ovis aries OX=9940 GN=DLG1 PE=3 SV=1	DLG1	0.0205602	0.204619
Alanine--tRNA ligase OS=Ovis aries OX=9940 GN=AARS PE=3 SV=1	AARS	0.0204428	0.118625
BMP2K_C domain-containing protein OS=Ovis aries OX=9940 PE=4 SV=1		0.0203113	0.128528
Collagen type IV alpha 2 chain OS=Ovis aries OX=9940 GN=COL4A2 PE=4 SV=1	COL4A2	0.0202944	0.0866835
Plexin domain containing 2 OS=Ovis aries OX=9940 GN=PLXDC2 PE=3 SV=1	PLXDC2	0.0202372	0.0713054
Creatine kinase OS=Ovis aries OX=9940 PE=3 SV=1	LOC101119377	0.0200764	0.267994
TPR_REGION domain-containing protein OS=Ovis aries OX=9940 GN=TTC27 PE=4 SV=1	TTC27	0.0199633	0.0769706
Plasma proteinase inhibitor (Fragment) OS=Ovis aries OX=9940 PE=1 SV=1		0.019924	0.0813163
Kinesin family member 13B OS=Ovis aries OX=9940 GN=KIF13B PE=3 SV=1	KIF13B	0.0198412	0.145892
18 kDa Sin3-associated polypeptide OS=Ovis aries OX=9940 GN=SAP18 PE=3 SV=1	SAP18	0.0198086	0.167237
Integrator complex subunit 7 OS=Ovis aries OX=9940 GN=INTS7 PE=3 SV=1	INTS7	0.0197968	0.191779
PX domain-containing protein OS=Ovis aries OX=9940 GN=SNX7 PE=3 SV=1	SNX7	0.019388	0.120121
Deoxyuridine 5'-triphosphate nucleotidohydrolase OS=Ovis aries OX=9940 GN=DUT PE=3 SV=1	DUT	0.0190164	0.0848981
Glucosidase 2 subunit beta OS=Ovis aries OX=9940 GN=PRKCSH PE=4 SV=1	PRKCSH	0.0190072	0.0927486
TPR_REGION domain-containing protein OS=Ovis aries OX=9940 GN=TTC1 PE=4 SV=1	TTC1	0.018976	0.164007
PHB domain-containing protein OS=Ovis aries OX=9940 GN=ERLIN2 PE=3 SV=1	ERLIN2	0.0189507	0.493523
NEDD8 OS=Ovis aries OX=9940 GN=NEDD8 PE=3 SV=1	NEDD8	0.0185821	0.0853347
60S ribosomal protein L18a OS=Ovis aries OX=9940 GN=RPL18A PE=3 SV=1	RPL18A	0.0185652	0.483227
Glutaredoxin 3 OS=Ovis aries OX=9940 GN=GLRX3 PE=4 SV=1	GLRX3	0.0185355	0.0842442
Acetyl-coenzyme A synthetase OS=Ovis aries OX=9940 GN=ACSS1 PE=3 SV=1	ACSS1	0.018489	0.121264
Uncharacterized protein OS=Ovis aries OX=9940 GN=BPNT1 PE=3 SV=1	BPNT1	0.0184133	0.0959237
PrdX deacylase domain-containing protein 1 OS=Ovis aries OX=9940 GN=LOC101122262 PE=3 SV=1	LOC101122262	0.0182177	0.240341
HATPase_c domain-containing protein OS=Ovis aries OX=9940 GN=HSP90AB1 PE=3 SV=1	HSP90AB1	0.0181884	0.0979537
Mothers against decapentaplegic homolog OS=Ovis aries OX=9940 GN=SMAD4 PE=3 SV=1	SMAD4	0.018098	0.0780616
Component of oligomeric Golgi complex 4 OS=Ovis aries OX=9940 GN=COG4 PE=3 SV=1	COG4	0.0180486	0.107676
Serine/threonine kinase 3 OS=Ovis aries OX=9940 GN=STK3 PE=4 SV=1	STK3	0.0179142	0.125485
Protein phosphatase 6 regulatory subunit 3 OS=Ovis aries OX=9940 GN=PPP6R3 PE=3 SV=1	PPP6R3	0.0179096	0.0823745
PB1 domain-containing protein OS=Ovis aries OX=9940 GN=TFG PE=4 SV=1	TFG	0.0176114	0.198288
ATP synthase subunit d, mitochondrial OS=Ovis aries OX=9940 GN=ATP5PD PE=3 SV=1	ATP5PD	0.0175629	0.169009
Uncharacterized protein OS=Ovis aries OX=9940 GN=CSDE1 PE=4 SV=1	CSDE1	0.0173534	0.111849
Histidine ammonia-lyase OS=Ovis aries OX=9940 GN=HAL PE=3 SV=1	HAL	0.0172708	0.146678
DNA-directed RNA polymerase II subunit E OS=Ovis aries OX=9940 GN=POLR2E PE=3 SV=1	POLR2E	0.017001	0.107438
Exocyst complex component Sec8 OS=Ovis aries OX=9940 PE=3 SV=1		0.0169381	0.315354
IQ motif and Sec7 domain ArfGEF 2 OS=Ovis aries OX=9940 GN=IQSEC2 PE=3 SV=1	IQSEC2	0.0169296	0.0781698
Aminotran_1_2 domain-containing protein OS=Ovis aries OX=9940 GN=GCAT PE=3 SV=1	GCAT	0.01681	0.0792685
NOP14 nucleolar protein OS=Ovis aries OX=9940 GN=NOP14 PE=3 SV=1	NOP14	0.0167458	0.360685
Elongator complex protein 6 OS=Ovis aries OX=9940 GN=ELP6 PE=3 SV=1	ELP6	0.0166962	0.0557601
Ubiquitin conjugating enzyme E2 Z OS=Ovis aries OX=9940 GN=UBE2Z PE=4 SV=1	UBE2Z	0.0166863	0.0274043
Polynucleotide phosphorylase 1 OS=Ovis aries OX=9940 GN=PNPT1 PE=3 SV=1	PNPT1	0.0166209	0.150175
NOL1/NOP2/Sun domain family member 2 OS=Ovis aries OX=9940 GN=NSUN2 PE=3 SV=1	NSUN2	0.0164487	0.149848
Sorting nexin OS=Ovis aries OX=9940 GN=SNX5 PE=3 SV=1	SNX5	0.0163217	0.152576
Acyl-CoA synthetase long chain family member 3 OS=Ovis aries OX=9940 GN=ACSL3 PE=4 SV=1	ACSL3	0.0162995	0.0593424
SH3 domain containing GRB2 like 1, endophilin A2 OS=Ovis aries OX=9940 GN=SH3GL1 PE=3 SV=1	SH3GL1	0.0162513	0.180252
Gamma-glutamylcyclotransferase OS=Ovis aries OX=9940 GN=CHAC1 PE=3 SV=1	CHAC1	0.016224	0.0487876
SERPINF1 OS=Ovis aries OX=9940 GN=SERPINF1 PE=2 SV=1	SERPINF1	0.0161685	0.0782846
DUF667 domain-containing protein OS=Ovis aries OX=9940 GN=CFAP20 PE=4 SV=1	CFAP20	0.0161142	0.101978
Methylsterol monooxygenase 1 OS=Ovis aries OX=9940 GN=MSMO1 PE=4 SV=1	MSMO1	0.0160942	0.0991279
Nuclear pore complex protein Nup93 OS=Ovis aries OX=9940 GN=NUP93 PE=3 SV=1	NUP93	0.0159715	0.255548
Caveolin OS=Ovis aries OX=9940 GN=CAV3 PE=3 SV=1	CAV3	0.0159475	0.0516495
Phosphomannomutase OS=Ovis aries OX=9940 GN=PMM2 PE=3 SV=1	PMM2	0.0158785	0.0921516
PPM-type phosphatase domain-containing protein OS=Ovis aries OX=9940 GN=PPM1G PE=3 SV=1	PPM1G	0.0157908	0.0771961
Syntaxin 2 OS=Ovis aries OX=9940 GN=STX2 PE=3 SV=1	STX2	0.0157369	0.229981
WD_REPEATS_REGION domain-containing protein OS=Ovis aries OX=9940 GN=PAK1IP1 PE=4 SV=1	PAK1IP1	0.0154163	0.0565382
Collagen beta(1-O)galactosyltransferase 1 OS=Ovis aries OX=9940 GN=COLGALT1 PE=3 SV=1	COLGALT1	0.0152893	0.250927
Protein misato homolog 1 OS=Ovis aries OX=9940 GN=MSTO1 PE=3 SV=1	MSTO1	0.0151106	0.0157658
Nuclear mitotic apparatus protein 1 OS=Ovis aries OX=9940 GN=NUMA1 PE=4 SV=1	NUMA1	0.0149858	0.277479
BOP1 ribosomal biogenesis factor OS=Ovis aries OX=9940 GN=BOP1 PE=4 SV=1	BOP1	0.0148997	0.08526
Dihydroorotate dehydrogenase (quinone), mitochondrial OS=Ovis aries OX=9940 GN=DHODH PE=3 SV=1	DHODH	0.0147752	0.0748914
LysM domain-containing protein OS=Ovis aries OX=9940 GN=OXR1 PE=3 SV=1	OXR1	0.0147497	0.150713
Ribosomal_L18e/L15P domain-containing protein OS=Ovis aries OX=9940 GN=RPL27A PE=3 SV=1	RPL27A	0.0145568	0.0902363
Coiled-coil domain-containing protein 167 OS=Ovis aries OX=9940 GN=CCDC167 PE=4 SV=1	CCDC167	0.0145393	0.0287167
Uncharacterized protein OS=Ovis aries OX=9940 GN=ACTA2 PE=3 SV=1	ACTA2	0.0144844	0.0769503
Uncharacterized protein OS=Ovis aries OX=9940 GN=MTREX PE=4 SV=1	MTREX	0.0144059	0.14382
Coiled-coil-helix-coiled-coil-helix domain containing 3 OS=Ovis aries OX=9940 GN=CHCHD3 PE=2 SV=1	CHCHD3	0.0142428	0.0785314
Uncharacterized protein OS=Ovis aries OX=9940 GN=ZW10 PE=3 SV=1	ZW10	0.0141731	0.0790483
Protein LTV1 homolog OS=Ovis aries OX=9940 GN=LTV1 PE=3 SV=1	LTV1	0.0141513	0.0385776
Superoxide dismutase [Cu-Zn] OS=Ovis aries OX=9940 GN=SOD1 PE=1 SV=2	SOD1	0.0139406	0.0988121
Cation-transporting ATPase OS=Ovis aries OX=9940 GN=ATP13A1 PE=3 SV=1	ATP13A1	0.0138158	0.20216
Ribosomal_S10 domain-containing protein OS=Ovis aries OX=9940 GN=MRPL48 PE=4 SV=1	MRPL48	0.0137706	0.0285532
RNA helicase OS=Ovis aries OX=9940 GN=DDX58 PE=3 SV=1	DDX58	0.0136383	0.112735
Charged multivesicular body protein 7 OS=Ovis aries OX=9940 GN=CHMP7 PE=3 SV=1	CHMP7	0.0135175	0.0441033
Hydroxysteroid 17-beta dehydrogenase 14 OS=Ovis aries OX=9940 GN=HSD17B14 PE=3 SV=1	HSD17B14	0.0133251	0.097485
Parvin alpha OS=Ovis aries OX=9940 GN=PARVA PE=3 SV=1	PARVA	0.0131396	0.11289
GST C-terminal domain-containing protein OS=Ovis aries OX=9940 GN=EEF1E1 PE=4 SV=1	EEF1E1	0.013139	0.0895829
Integral membrane protein 2 OS=Ovis aries OX=9940 GN=ITM2B PE=2 SV=1	ITM2B	0.0129891	0.0920673
Spliceosome-associated protein CWC15 homolog OS=Ovis aries OX=9940 GN=CWC15 PE=3 SV=1	CWC15	0.0129489	0.0690202
Notchless homolog 1 OS=Ovis aries OX=9940 GN=NLE1 PE=4 SV=1	NLE1	0.0128852	0.0345171
GRIP domain-containing protein OS=Ovis aries OX=9940 GN=TRIP11 PE=4 SV=1	TRIP11	0.0128145	0.0960888
Uncharacterized protein OS=Ovis aries OX=9940 GN=FBLN7 PE=4 SV=1	FBLN7	0.0127946	0.0271253
SUMO-activating enzyme subunit 2 OS=Ovis aries OX=9940 GN=UBA2 PE=3 SV=1	UBA2	0.0126258	0.0878966
tRNA-synt_1e domain-containing protein OS=Ovis aries OX=9940 PE=4 SV=1		0.0125881	0.196927
RPOLD domain-containing protein OS=Ovis aries OX=9940 GN=POLR2C PE=3 SV=1	POLR2C	0.0124858	0.152929
BAG family molecular chaperone regulator 1 OS=Ovis aries OX=9940 GN=BAG1 PE=4 SV=1	BAG1	0.0122569	0.0628946
S_100 domain-containing protein OS=Ovis aries OX=9940 GN=TCHHL1 PE=4 SV=1	TCHHL1	0.0119542	0.039954
LRRcap domain-containing protein OS=Ovis aries OX=9940 PE=4 SV=1		0.011772	0.100902
Myeloid derived growth factor OS=Ovis aries OX=9940 GN=MYDGF PE=4 SV=1	MYDGF	0.0115072	0.0518945
Olfactomedin-like domain-containing protein OS=Ovis aries OX=9940 GN=OLFML3 PE=3 SV=1	OLFML3	0.0111524	0.265635
SF3b1 domain-containing protein OS=Ovis aries OX=9940 GN=SF3B1 PE=3 SV=1	SF3B1	0.0110223	0.160358
Uncharacterized protein OS=Ovis aries OX=9940 GN=LRBA PE=3 SV=1	LRBA	0.0108189	0.0907666
Band 4.1 OS=Ovis aries OX=9940 GN=EPB41 PE=4 SV=1	EPB41	0.0106976	0.125098
Ribonuclease inhibitor OS=Ovis aries OX=9940 PE=4 SV=1		0.0106654	0.105825
WD repeat domain 43 OS=Ovis aries OX=9940 GN=WDR43 PE=4 SV=1	WDR43	0.0103427	0.0505238
Uncharacterized protein OS=Ovis aries OX=9940 GN=TLN1 PE=4 SV=1	TLN1	0.0103189	0.153466
UFM1-activating enzyme OS=Ovis aries OX=9940 GN=UBA5 PE=3 SV=1	UBA5	0.0102451	0.0366855
Ankyrin repeat domain 17 OS=Ovis aries OX=9940 GN=ANKRD17 PE=4 SV=1	ANKRD17	0.0100864	0.0467935
AMP_N domain-containing protein OS=Ovis aries OX=9940 GN=PEPD PE=3 SV=1	PEPD	0.00991574	0.0334038
IGF-II (Fragment) OS=Ovis aries OX=9940 PE=2 SV=1		0.00968748	0.0366649
GMP reductase OS=Ovis aries OX=9940 GN=GMPR2 PE=3 SV=1	GMPR2	0.00964185	0.0803065
Translocating chain-associated membrane protein OS=Ovis aries OX=9940 GN=TRAM1 PE=3 SV=1	TRAM1	0.00960229	0.03693
Mitogen-activated protein kinase kinase kinase OS=Ovis aries OX=9940 GN=MAP3K6 PE=4 SV=1	MAP3K6	0.00957423	0.0439783
Spectrin alpha, non-erythrocytic 1 OS=Ovis aries OX=9940 GN=SPTAN1 PE=4 SV=1	SPTAN1	0.00954577	0.0992279
SUN domain-containing protein OS=Ovis aries OX=9940 GN=SUN2 PE=4 SV=1	SUN2	0.00945716	0.0757099
RRM domain-containing protein OS=Ovis aries OX=9940 GN=CSTF2 PE=4 SV=1	CSTF2	0.00941452	0.0862336
EGF containing fibulin extracellular matrix protein 1 OS=Ovis aries OX=9940 GN=EFEMP1 PE=4 SV=1	EFEMP1	0.00939933	0.101815
Zinc finger protein 598 OS=Ovis aries OX=9940 GN=ZNF598 PE=4 SV=1	ZNF598	0.00938907	0.0961657
Ubiquitin domain containing 1 OS=Ovis aries OX=9940 GN=UBTD1 PE=4 SV=1	UBTD1	0.00931536	0.0604215
Uncharacterized protein OS=Ovis aries OX=9940 GN=TUT7 PE=4 SV=1	TUT7	0.0093074	0.0398724
HID1 domain containing OS=Ovis aries OX=9940 GN=HID1 PE=4 SV=1	HID1	0.00925242	0.0343937
PSP domain-containing protein OS=Ovis aries OX=9940 GN=SF3B2 PE=4 SV=1	SF3B2	0.00924283	0.0619153
Uncharacterized protein OS=Ovis aries OX=9940 GN=HMCN1 PE=4 SV=1	HMCN1	0.00920912	0.0635994
Uncharacterized protein OS=Ovis aries OX=9940 GN=SEC22B PE=3 SV=1	SEC22B	0.00912456	0.0616836
DNA helicase OS=Ovis aries OX=9940 GN=CHD4 PE=3 SV=1	CHD4	0.00909157	0.0621399
Protein transport protein SEC23 OS=Ovis aries OX=9940 GN=SEC23A PE=3 SV=1	SEC23A	0.00901199	0.0742157
Deoxyribonuclease I OS=Ovis aries OX=9940 GN=DNASE1L1 PE=3 SV=1	DNASE1L1	0.00900111	0.0335073
Uncharacterized protein OS=Ovis aries OX=9940 GN=FBN1 PE=3 SV=1	FBN1	0.00894615	0.0351656
Peptidylprolyl isomerase OS=Ovis aries OX=9940 GN=FKBP2 PE=4 SV=1	FKBP2	0.00884863	0.0346357
GrpE protein homolog OS=Ovis aries OX=9940 GN=GRPEL1 PE=3 SV=1	GRPEL1	0.00884599	0.0684873
Prothrombin OS=Ovis aries OX=9940 GN=F2 PE=2 SV=1	F2	0.00878844	0.0303247
Histone deacetylase 1 OS=Ovis aries OX=9940 GN=HDAC1 PE=3 SV=1	HDAC1	0.0087435	0.146061
HBS1-like protein OS=Ovis aries OX=9940 PE=4 SV=1		0.00801216	0.0317515
Uncharacterized protein OS=Ovis aries OX=9940 GN=PRPF40A PE=4 SV=1	PRPF40A	0.00767167	0.0825162
RNA transcription, translation and transport factor protein OS=Ovis aries OX=9940 GN=RTRAF PE=3 SV=1	RTRAF	0.00757391	0.0578409
Glycogen synthase kinase-3 beta OS=Ovis aries OX=9940 GN=GSK3B PE=3 SV=1	GSK3B	0.00742534	0.0154601
DnaJ heat shock protein family (Hsp40) member A2 OS=Ovis aries OX=9940 GN=DNAJA2 PE=4 SV=1	DNAJA2	0.0074001	0.078412
Neural cell adhesion molecule 1 OS=Ovis aries OX=9940 GN=NCAM1 PE=4 SV=1	NCAM1	0.00709474	0.0497536
Uncharacterized protein OS=Ovis aries OX=9940 GN=ACTA1 PE=3 SV=1	ACTA1	0.00701811	0.0650466
Transaldolase OS=Ovis aries OX=9940 GN=TALDO1 PE=3 SV=1	TALDO1	0.0069535	0.034106
Eukaryotic translation initiation factor 6 OS=Ovis aries OX=9940 GN=EIF6 PE=2 SV=1	EIF6	0.00681232	0.0235654
Acetyl-CoA carboxylase (Fragment) OS=Ovis aries OX=9940 PE=2 SV=1	ACACA	0.00679896	0.0269298
Striatin 3 OS=Ovis aries OX=9940 GN=STRN3 PE=3 SV=1	STRN3	0.00668775	0.0357361
Dedicator of cytokinesis 1 OS=Ovis aries OX=9940 GN=DOCK1 PE=3 SV=1	DOCK1	0.00659516	0.0296719
Uncharacterized protein OS=Ovis aries OX=9940 GN=POGZ PE=4 SV=1	POGZ	0.00649433	0.0156762
Uncharacterized protein OS=Ovis aries OX=9940 GN=RDH14 PE=3 SV=1	RDH14	0.00646137	0.0392286
Protein disulfide-isomerase OS=Ovis aries OX=9940 GN=PDIA3 PE=2 SV=1	PDIA3	0.00625836	0.0362795
Guanine deaminase OS=Ovis aries OX=9940 GN=GDA PE=3 SV=1	GDA	0.00614671	0.136179
ATP binding cassette subfamily D member 3 OS=Ovis aries OX=9940 GN=ABCD3 PE=3 SV=1	ABCD3	0.0061462	0.0356537
Complex I-AGGG OS=Ovis aries OX=9940 GN=NDUFB2 PE=1 SV=1	NDUFB2	0.00612154	0.0567614
Calpain 5 OS=Ovis aries OX=9940 GN=CAPN5 PE=3 SV=1	CAPN5	0.00605354	0.0180371
TNF alpha induced protein 8 like 3 OS=Ovis aries OX=9940 GN=TNFAIP8L3 PE=4 SV=1	TNFAIP8L3	0.00603112	0.01784
Mannose C-type lectin receptor OS=Ovis aries OX=9940 PE=2 SV=1	MRC1	0.00595104	0.0563368
Trafficking protein particle complex 2 like OS=Ovis aries OX=9940 GN=TRAPPC2L PE=3 SV=1	TRAPPC2L	0.00582492	0.0822612
Uncharacterized protein OS=Ovis aries OX=9940 PE=3 SV=1		0.00582152	0.0361747
Selenoprotein F OS=Ovis aries OX=9940 GN=SELENOF PE=3 SV=1	SELENOF	0.00560732	0.0722746
PSP domain-containing protein OS=Ovis aries OX=9940 GN=SF3B2 PE=4 SV=1	SF3B2	0.00558182	0.0515331
SURP and G-patch domain containing 1 OS=Ovis aries OX=9940 GN=SUGP1 PE=4 SV=1	SUGP1	0.00536796	0.0192389
Trifunctional purine biosynthetic protein adenosine-3 OS=Ovis aries OX=9940 GN=GART PE=3 SV=1	GART	0.00525717	0.013205
Flap endonuclease 1 OS=Ovis aries OX=9940 GN=FEN1 PE=3 SV=1	FEN1	0.0051753	0.0306379
Uncharacterized protein OS=Ovis aries OX=9940 GN=RNF25 PE=4 SV=1	RNF25	0.00509777	0.012103
SWI/SNF related, matrix associated, actin dependent regulator of chromatin subfamily c member 2 OS=Ovis aries OX=9940 GN=SMARCC2 PE=4 SV=1	SMARCC2	0.00509741	0.0378484
Clathrin light chain OS=Ovis aries OX=9940 GN=CLTB PE=3 SV=1	CLTB	0.005081	0.0470535
OBG-type G domain-containing protein OS=Ovis aries OX=9940 GN=DRG1 PE=4 SV=1	DRG1	0.00485241	0.013021
Pre-mRNA splicing factor SRP20-like protein OS=Ovis aries OX=9940 GN=SRSF3 PE=2 SV=1	SRSF3	0.00476182	0.0392166
MFAP1 domain-containing protein OS=Ovis aries OX=9940 GN=MFAP1 PE=3 SV=1	MFAP1	0.00464767	0.0251151
60S ribosomal protein L12 OS=Ovis aries OX=9940 GN=LOC114110327 PE=3 SV=1	LOC114110327	0.0045186	0.0278355
RNA binding motif protein 19 OS=Ovis aries OX=9940 GN=RBM19 PE=4 SV=1	RBM19	0.00447134	0.0186482
Membrane bound O-acyltransferase domain containing 7 OS=Ovis aries OX=9940 GN=MBOAT7 PE=4 SV=1	MBOAT7	0.00431981	0.0205524
Ubiquitin carboxyl-terminal hydrolase OS=Ovis aries OX=9940 GN=UCHL1 PE=3 SV=1	UCHL1	0.00422855	0.0197595
BAF chromatin remodeling complex subunit BCL7A OS=Ovis aries OX=9940 GN=BCL7A PE=3 SV=1	BCL7A	0.00417502	0.0243042
Nicalin OS=Ovis aries OX=9940 GN=NCLN PE=3 SV=1	NCLN	0.00411079	0.0431664
SWI/SNF related, matrix associated, actin dependent regulator of chromatin, subfamily a, member 2 OS=Ovis aries OX=9940 GN=SMARCA2 PE=3 SV=1	SMARCA2	0.00409935	0.015108
Uncharacterized protein OS=Ovis aries OX=9940 GN=FIBP PE=4 SV=1	FIBP	0.0040456	0.0161236
Autophagy-related protein 101 OS=Ovis aries OX=9940 GN=ATG101 PE=3 SV=1	ATG101	0.00403984	0.018998
Small nuclear ribonucleoprotein Sm D2 OS=Ovis aries OX=9940 GN=SNRPD2 PE=3 SV=1	SNRPD2	0.00400707	0.031574
DIS3-like exonuclease 2 OS=Ovis aries OX=9940 GN=DIS3L2 PE=3 SV=1	DIS3L2	0.00400112	0.0324294
Uncharacterized protein OS=Ovis aries OX=9940 GN=CC2D1A PE=3 SV=1	CC2D1A	0.0038456	0.0268382
Vacuolar-sorting protein SNF8 OS=Ovis aries OX=9940 GN=SNF8 PE=3 SV=1	SNF8	0.00384406	0.028149
Glutaminyl-tRNA synthetase OS=Ovis aries OX=9940 GN=QARS1 PE=3 SV=1	QARS1	0.0037893	0.0197851
Protein phosphatase 1 regulatory subunit 22 OS=Ovis aries OX=9940 PE=3 SV=1		0.00359695	0.0199512
Vacuolar proton pump subunit B OS=Ovis aries OX=9940 GN=ATP6V1B1 PE=3 SV=1	ATP6V1B1	0.00355447	0.0139667
WD_REPEATS_REGION domain-containing protein OS=Ovis aries OX=9940 GN=PREB PE=4 SV=1	PREB	0.00345813	0.0138447
Uncharacterized protein OS=Ovis aries OX=9940 GN=DPF2 PE=3 SV=1	DPF2	0.00333183	0.0198728
ANK_REP_REGION domain-containing protein OS=Ovis aries OX=9940 GN=TRPV2 PE=4 SV=1	TRPV2	0.00321766	0.0155583
Chromosome 17 open reading frame 75 OS=Ovis aries OX=9940 GN=C17orf75 PE=4 SV=1	C17orf75	0.00312122	0.0121811
Uncharacterized protein OS=Ovis aries OX=9940 PE=4 SV=1		0.00298114	0.00496209
Clat_adaptor_s domain-containing protein OS=Ovis aries OX=9940 PE=3 SV=1		0.00297544	0.0143844
RNA helicase OS=Ovis aries OX=9940 GN=DDX17 PE=3 SV=1	DDX17	0.002845	0.021838
LRRcap domain-containing protein OS=Ovis aries OX=9940 GN=ANP32A PE=4 SV=1	ANP32A	0.0027784	0.0293525
GPI ethanolamine phosphate transferase 3 OS=Ovis aries OX=9940 GN=PIGO PE=3 SV=1	PIGO	0.0026316	0.00765347
Uncharacterized protein OS=Ovis aries OX=9940 GN=SLC25A31 PE=3 SV=1	SLC25A31	0.00246623	0.0066362
Transcription factor A, mitochondrial OS=Ovis aries OX=9940 GN=TFAM PE=4 SV=1	TFAM	0.00218369	0.0220853
Endoplasmic reticulum oxidoreductase 1 alpha OS=Ovis aries OX=9940 GN=ERO1A PE=3 SV=1	ERO1A	0.00215198	0.0119125
Uncharacterized protein OS=Ovis aries OX=9940 GN=RBM5 PE=3 SV=1	RBM5	0.00204729	0.008874
Small acidic protein OS=Ovis aries OX=9940 GN=C11orf58 PE=3 SV=1	C11orf58	0.00201391	0.00855901
Pre-mRNA-splicing factor RBM22 OS=Ovis aries OX=9940 GN=RBM22 PE=3 SV=1	RBM22	0.00186428	0.0293149
Uncharacterized protein OS=Ovis aries OX=9940 GN=USP8 PE=4 SV=1	USP8	0.00173321	0.0119956
BAT2_N domain-containing protein OS=Ovis aries OX=9940 GN=PRRC2C PE=4 SV=1	PRRC2C	0.00165211	0.0108463
VPS26, retromer complex component A OS=Ovis aries OX=9940 GN=VPS26A PE=3 SV=1	VPS26A	0.0015811	0.00773716
Cold-inducible RNA-binding protein OS=Ovis aries OX=9940 GN=CIRBP PE=4 SV=1	CIRBP	0.00124806	0.00440263
RBR-type E3 ubiquitin transferase OS=Ovis aries OX=9940 GN=RNF31 PE=3 SV=1	RNF31	0.00105921	0.00507603
MIF4G domain-containing protein OS=Ovis aries OX=9940 GN=NCBP1 PE=3 SV=1	NCBP1	0.000895643	0.00389969
Uncharacterized protein OS=Ovis aries OX=9940 GN=MAP1LC3B PE=3 SV=1	MAP1LC3B	0.000820823	0.00290934
Glutamine synthetase OS=Ovis aries OX=9940 GN=GLUL PE=3 SV=1	GLUL	0.000816383	0.00622499
Solute carrier family 27 member 4 OS=Ovis aries OX=9940 GN=SLC27A4 PE=3 SV=1	SLC27A4	0.00078236	0.00486658
Uncharacterized protein OS=Ovis aries OX=9940 GN=LSM14A PE=3 SV=1	LSM14A	0.00068742	0.00448539
Protein phosphatase 6 regulatory subunit 1 OS=Ovis aries OX=9940 GN=PPP6R1 PE=3 SV=1	PPP6R1	0.000652145	0.00160849
Mothers against decapentaplegic homolog OS=Ovis aries OX=9940 GN=SMAD5 PE=3 SV=1	SMAD5	0.000598348	0.00288442
40S ribosomal protein S26 OS=Ovis aries OX=9940 GN=RPS26 PE=3 SV=3	RPS26	0.000592152	0.00423452
LIM zinc-binding domain-containing protein OS=Ovis aries OX=9940 PE=4 SV=1		0.000524995	0.00358406
Inositol-polyphosphate 5-phosphatase OS=Ovis aries OX=9940 GN=INPP5K PE=3 SV=1	INPP5K	0.000397441	0.000635914
DUF3730 domain-containing protein OS=Ovis aries OX=9940 GN=FOCAD PE=4 SV=1	FOCAD	0.000389637	0.00181609
Microtubule associated protein 1B OS=Ovis aries OX=9940 GN=MAP1B PE=4 SV=1	MAP1B	0.000389362	0.00315503
G protein pathway suppressor 1 OS=Ovis aries OX=9940 GN=GPS1 PE=3 SV=1	GPS1	0.000378136	0.0037935
Interleukin enhancer binding factor 3 OS=Ovis aries OX=9940 GN=ILF3 PE=4 SV=1	ILF3	0.000363006	0.00156922
15 kDa phosphoprotein enriched in astrocytes OS=Ovis aries OX=9940 GN=PEA15 PE=4 SV=1	PEA15	0.000324591	0.00136351
Protein S100 OS=Ovis aries OX=9940 GN=S100A3 PE=3 SV=1	S100A3	-0.000240913	0.00102063
Uncharacterized protein OS=Ovis aries OX=9940 PE=3 SV=1		-0.000426185	0.00185386
Anthrax toxin receptor OS=Ovis aries OX=9940 GN=ANTXR2 PE=3 SV=1	ANTXR2	-0.000695047	0.00340438
LIM domain binding 3 OS=Ovis aries OX=9940 GN=LDB3 PE=4 SV=1	LDB3	-0.00103148	0.00365818
HIRA interacting protein 3 OS=Ovis aries OX=9940 GN=HIRIP3 PE=4 SV=1	HIRIP3	-0.00109584	0.0111445
Laminin subunit beta 2 OS=Ovis aries OX=9940 GN=LAMB2 PE=4 SV=1	LAMB2	-0.00113185	0.0137722
SH3 domain-containing protein OS=Ovis aries OX=9940 GN=MIA2 PE=4 SV=1	MIA2	-0.00115574	0.00598316
Complex I-B15 OS=Ovis aries OX=9940 GN=NDUFB4 PE=1 SV=1	NDUFB4	-0.00124284	0.0066368
Geranylgeranyl transferase type-2 subunit beta OS=Ovis aries OX=9940 PE=2 SV=1	RABGGTB	-0.00126296	0.00633315
Uncharacterized protein OS=Ovis aries OX=9940 GN=GOLPH3 PE=3 SV=1	GOLPH3	-0.00134843	0.0155588
Ataxin 2 OS=Ovis aries OX=9940 GN=ATXN2 PE=3 SV=1	ATXN2	-0.00153133	0.00923692
Ankyrin 3 OS=Ovis aries OX=9940 GN=ANK3 PE=4 SV=1	ANK3	-0.00158117	0.00690415
PDZ and LIM domain 3 OS=Ovis aries OX=9940 GN=PDLIM3 PE=4 SV=1	PDLIM3	-0.00161745	0.0130025
Ras-related GTP-binding protein OS=Ovis aries OX=9940 PE=2 SV=1	RRAGC	-0.00163137	0.00978413
Dynactin subunit 1 OS=Ovis aries OX=9940 GN=DCTN1 PE=3 SV=1	DCTN1	-0.00182821	0.00812503
Inosine-guanosine phosphorylase OS=Ovis aries OX=9940 PE=3 SV=1		-0.00192873	0.0115862
Uncharacterized protein OS=Ovis aries OX=9940 GN=RSL1D1 PE=4 SV=1	RSL1D1	-0.00199004	0.0100054
Eukaryotic translation initiation factor 4C OS=Ovis aries OX=9940 GN=EIF1AX PE=2 SV=1	EIF1AX	-0.00206992	0.0168291
PGAM family member 5, mitochondrial serine/threonine protein phosphatase OS=Ovis aries OX=9940 GN=PGAM5 PE=4 SV=1	PGAM5	-0.00219452	0.0109637
Bromodomain adjacent to zinc finger domain 1B OS=Ovis aries OX=9940 GN=BAZ1B PE=4 SV=1	BAZ1B	-0.00229475	0.0208905
ATPase family AAA domain containing 3A OS=Ovis aries OX=9940 GN=ATAD3A PE=3 SV=1	ATAD3A	-0.00233422	0.0113387
Regulator of microtubule dynamics 1 OS=Ovis aries OX=9940 GN=RMDN1 PE=4 SV=1	RMDN1	-0.00236322	0.00746318
Carboxypeptidase Q OS=Ovis aries OX=9940 GN=CPQ PE=4 SV=1	CPQ	-0.00249745	0.0134121
Uncharacterized protein OS=Ovis aries OX=9940 GN=WDFY1 PE=4 SV=1	WDFY1	-0.00254469	0.0286305
CX9C domain-containing protein OS=Ovis aries OX=9940 GN=CHCHD5 PE=4 SV=1	CHCHD5	-0.00260521	0.00596221
40S ribosomal protein S7 OS=Ovis aries OX=9940 PE=3 SV=1		-0.00263479	0.0306482
Decorin OS=Ovis aries OX=9940 GN=DCN PE=3 SV=1	DCN	-0.00271397	0.015971
Cyclin G associated kinase OS=Ovis aries OX=9940 GN=GAK PE=4 SV=1	GAK	-0.00279395	0.0129716
ATP synthase subunit e, mitochondrial OS=Ovis aries OX=9940 GN=LOC101102454 PE=3 SV=1	LOC101102454	-0.003046	0.0324497
60S ribosomal protein L17 OS=Ovis aries OX=9940 GN=LOC780463 PE=3 SV=1	LOC780463	-0.00310839	0.0259193
UBC core domain-containing protein OS=Ovis aries OX=9940 GN=UBE2F PE=3 SV=1	UBE2F	-0.00332315	0.0415749
NADPH:adrenodoxin oxidoreductase, mitochondrial OS=Ovis aries OX=9940 GN=FDXR PE=3 SV=1	FDXR	-0.00349385	0.0192354
Integrator complex subunit 10 OS=Ovis aries OX=9940 GN=INTS10 PE=3 SV=1	INTS10	-0.00353647	0.0112495
Uncharacterized protein OS=Ovis aries OX=9940 GN=TMOD3 PE=4 SV=1	TMOD3	-0.00357094	0.0607294
Uncharacterized protein OS=Ovis aries OX=9940 GN=NSD3 PE=4 SV=1	NSD3	-0.00358636	0.020724
Uncharacterized protein OS=Ovis aries OX=9940 PE=4 SV=1		-0.00365062	0.0338159
Replication protein A2 OS=Ovis aries OX=9940 GN=RPA2 PE=3 SV=1	RPA2	-0.00374137	0.0744562
RNA binding motif protein 14 OS=Ovis aries OX=9940 GN=RBM14 PE=4 SV=1	RBM14	-0.00386286	0.0226366
Non-specific serine/threonine protein kinase OS=Ovis aries OX=9940 GN=MARK2 PE=3 SV=1	MARK2	-0.00406394	0.0308771
Olfactomedin-like domain-containing protein OS=Ovis aries OX=9940 GN=OLFML1 PE=4 SV=1	OLFML1	-0.00408783	0.0362183
2-oxoisovalerate dehydrogenase subunit alpha OS=Ovis aries OX=9940 GN=BCKDHA PE=3 SV=1	BCKDHA	-0.00410904	0.0226392
40S ribosomal protein S9 OS=Ovis aries OX=9940 PE=3 SV=1	RPS9	-0.00416633	0.0331153
Eukaryotic translation initiation factor 1A domain-containing protein OS=Ovis aries OX=9940 GN=EIF1AD PE=3 SV=1	EIF1AD	-0.00417102	0.0134061
Uncharacterized protein OS=Ovis aries OX=9940 GN=PHYH PE=4 SV=1	PHYH	-0.00422586	0.0253067
Phosphatidylinositol binding clathrin assembly protein OS=Ovis aries OX=9940 GN=PICALM PE=3 SV=1	PICALM	-0.00425277	0.0932249
Ring finger protein 213 OS=Ovis aries OX=9940 GN=RNF213 PE=4 SV=1	RNF213	-0.00426099	0.0110298
T-complex protein 1 subunit delta OS=Ovis aries OX=9940 PE=3 SV=1		-0.00433066	0.0312888
Argininosuccinate lyase OS=Ovis aries OX=9940 GN=ASL PE=3 SV=1	ASL	-0.00434351	0.036141
Uncharacterized protein OS=Ovis aries OX=9940 PE=4 SV=1	ABCF2	-0.00435759	0.0256408
Importin N-terminal domain-containing protein OS=Ovis aries OX=9940 GN=XPO5 PE=4 SV=1	XPO5	-0.00439334	0.0329703
Heterogeneous nuclear ribonucleoprotein U OS=Ovis aries OX=9940 GN=HNRNPU PE=4 SV=1	HNRNPU	-0.00445875	0.035458
Tubulin beta chain OS=Ovis aries OX=9940 GN=TUBB1 PE=3 SV=1	TUBB1	-0.00476749	0.0325595
Paraspeckle component 1 OS=Ovis aries OX=9940 GN=PSPC1 PE=3 SV=1	PSPC1	-0.00479743	0.111172
Keratin 12 OS=Ovis aries OX=9940 GN=KRT12 PE=3 SV=1	KRT12	-0.00491139	0.0127589
ATP-citrate synthase OS=Ovis aries OX=9940 GN=ACLY PE=2 SV=1	ACLY	-0.00501561	0.0387426
Non-specific serine/threonine protein kinase OS=Ovis aries OX=9940 GN=TP53RK PE=3 SV=1	TP53RK	-0.00514829	0.0285777
Uncharacterized protein OS=Ovis aries OX=9940 GN=RAB5C PE=4 SV=1	RAB5C	-0.00528946	0.0435044
Elastin microfibril interfacer 2 OS=Ovis aries OX=9940 GN=EMILIN2 PE=4 SV=1	EMILIN2	-0.00531098	0.0428177
10 kDa heat shock protein, mitochondrial OS=Ovis aries OX=9940 GN=HSP10 PE=3 SV=1	HSP10	-0.00535732	0.0423844
WD_REPEATS_REGION domain-containing protein OS=Ovis aries OX=9940 GN=NUP43 PE=4 SV=1	NUP43	-0.00537217	0.0264765
Kinesin family member 21A OS=Ovis aries OX=9940 GN=KIF21A PE=3 SV=1	KIF21A	-0.00560788	0.043976
Uncharacterized protein OS=Ovis aries OX=9940 GN=SEC24D PE=3 SV=1	SEC24D	-0.00561244	0.0224323
General vesicular transport factor p115 OS=Ovis aries OX=9940 GN=USO1 PE=3 SV=1	USO1	-0.00563809	0.050303
WD_REPEATS_REGION domain-containing protein OS=Ovis aries OX=9940 GN=CSTF1 PE=4 SV=1	CSTF1	-0.00568272	0.0147391
Arginyl aminopeptidase OS=Ovis aries OX=9940 GN=RNPEP PE=3 SV=1	RNPEP	-0.00572552	0.0536425
SLC25A5 OS=Ovis aries OX=9940 PE=2 SV=1	SLC25A5	-0.00573943	0.0339317
DnaJ heat shock protein family (Hsp40) member C3 OS=Ovis aries OX=9940 GN=DNAJC3 PE=4 SV=1	DNAJC3	-0.0058939	0.0207318
Charged multivesicular body protein 6 OS=Ovis aries OX=9940 GN=CHMP6 PE=3 SV=1	CHMP6	-0.00596587	0.023121
60S ribosomal protein L6 OS=Ovis aries OX=9940 GN=LOC114116368 PE=3 SV=1	LOC114116368	-0.00603817	0.0432927
Uncharacterized protein OS=Ovis aries OX=9940 PE=3 SV=1	LOC101104700; IFITM3	-0.00609119	0.0130427
Syntaxin binding protein 1 OS=Ovis aries OX=9940 GN=STXBP1 PE=3 SV=1	STXBP1	-0.00631723	0.0597397
PRKCSH domain-containing protein OS=Ovis aries OX=9940 GN=OS9 PE=4 SV=1	OS9	-0.00648135	0.018481
Delta(24)-sterol reductase OS=Ovis aries OX=9940 GN=DHCR24 PE=4 SV=1	DHCR24	-0.00654905	0.0333894
Heparan sulfate proteoglycan 2 OS=Ovis aries OX=9940 GN=HSPG2 PE=4 SV=1	HSPG2	-0.00657951	0.0525687
GATA-type domain-containing protein OS=Ovis aries OX=9940 GN=GATAD2B PE=4 SV=1	GATAD2B	-0.00663776	0.032648
Mannosyl-glycoprotein endo-beta-N-acetylglucosaminidase OS=Ovis aries OX=9940 GN=ENGASE PE=3 SV=1	ENGASE	-0.00673674	0.042663
Suf domain-containing protein OS=Ovis aries OX=9940 GN=CSTF3 PE=4 SV=1	CSTF3	-0.00695356	0.054918
Dynamin GTPase OS=Ovis aries OX=9940 GN=DNM1 PE=3 SV=1	DNM1	-0.00696396	0.0410823
Uncharacterized protein OS=Ovis aries OX=9940 PE=4 SV=1		-0.00709005	0.0213138
Nuclear factor 1 OS=Ovis aries OX=9940 GN=NFIB PE=3 SV=1	NFIB	-0.00733127	0.0334941
Sad1 and UNC84 domain containing 1 OS=Ovis aries OX=9940 GN=SUN1 PE=4 SV=1	SUN1	-0.00745378	0.0851174
Uncharacterized protein OS=Ovis aries OX=9940 GN=PPFIBP1 PE=3 SV=1	PPFIBP1	-0.0074769	0.0821444
Flotillin OS=Ovis aries OX=9940 GN=FLOT2 PE=3 SV=1	FLOT2	-0.00754383	0.0585307
Activity dependent neuroprotector homeobox OS=Ovis aries OX=9940 GN=ADNP PE=4 SV=1	ADNP	-0.00778388	0.0507807
Coatomer subunit delta OS=Ovis aries OX=9940 GN=ARCN1 PE=3 SV=1	ARCN1	-0.0078013	0.0475798
SEC31 homolog A, COPII coat complex component OS=Ovis aries OX=9940 GN=SEC31A PE=3 SV=1	SEC31A	-0.00789164	0.0414519
AP-3 complex subunit delta OS=Ovis aries OX=9940 GN=AP3D1 PE=3 SV=1	AP3D1	-0.00799406	0.0478023
Ceramide transfer protein OS=Ovis aries OX=9940 GN=CERT1 PE=4 SV=1	CERT1	-0.00801011	0.134276
LDL receptor related protein associated protein 1 OS=Ovis aries OX=9940 GN=LRPAP1 PE=4 SV=1	LRPAP1	-0.00803265	0.105081
Family with sequence similarity 133 member B OS=Ovis aries OX=9940 GN=FAM133B PE=3 SV=1	FAM133B	-0.00807319	0.045955
A-kinase anchoring protein 8 like OS=Ovis aries OX=9940 GN=AKAP8L PE=3 SV=1	AKAP8L	-0.00809119	0.0546219
Coiled-coil domain-containing protein 128 OS=Ovis aries OX=9940 GN=PPP1R21 PE=4 SV=1	PPP1R21	-0.00827185	0.0408409
Protein pelota homolog OS=Ovis aries OX=9940 GN=PELO PE=3 SV=1	PELO	-0.00845795	0.0877663
DnaJ homolog subfamily C member 2 OS=Ovis aries OX=9940 GN=DNAJC2 PE=4 SV=1	DNAJC2	-0.00857866	0.0437773
Brix domain-containing protein OS=Ovis aries OX=9940 PE=4 SV=1		-0.00896873	0.0387348
Arginine--tRNA ligase, cytoplasmic OS=Ovis aries OX=9940 GN=RARS1 PE=3 SV=1	RARS1	-0.00906832	0.0419759
zf-Tim10_DDP domain-containing protein OS=Ovis aries OX=9940 GN=TIMM10 PE=3 SV=1	TIMM10	-0.00911132	0.032686
Uncharacterized protein OS=Ovis aries OX=9940 GN=SMU1 PE=4 SV=1	SMU1	-0.00939131	0.060977
HABP4_PAI-RBP1 domain-containing protein OS=Ovis aries OX=9940 GN=SERBP1 PE=4 SV=1	SERBP1	-0.00940334	0.0549129
UDP-N-acetylglucosamine pyrophosphorylase 1 OS=Ovis aries OX=9940 GN=UAP1 PE=4 SV=1	UAP1	-0.00940542	0.052461
Sorting nexin 1 OS=Ovis aries OX=9940 GN=SNX1 PE=3 SV=1	SNX1	-0.00944329	0.0667456
Uncharacterized protein OS=Ovis aries OX=9940 GN=SH3BP1 PE=4 SV=1	SH3BP1	-0.00951036	0.0441326
WD_REPEATS_REGION domain-containing protein OS=Ovis aries OX=9940 GN=WDR37 PE=4 SV=1	WDR37	-0.00954766	0.0503288
Chromosome 9 open reading frame 78 OS=Ovis aries OX=9940 GN=C9orf78 PE=3 SV=1	C9orf78	-0.00969446	0.0437806
SH3 domain containing GRB2 like, endophilin B2 OS=Ovis aries OX=9940 GN=SH3GLB2 PE=4 SV=1	SH3GLB2	-0.00976162	0.0932797
Uncharacterized protein OS=Ovis aries OX=9940 GN=HSD17B7 PE=4 SV=1	HSD17B7	-0.00981633	0.0364073
Uncharacterized protein OS=Ovis aries OX=9940 PE=3 SV=1	CUL7	-0.00994432	0.0920683
Dehydrogenase/reductase 7B OS=Ovis aries OX=9940 GN=DHRS7B PE=3 SV=1	DHRS7B	-0.00994482	0.16392
Uncharacterized protein OS=Ovis aries OX=9940 GN=HNRNPM PE=4 SV=1	HNRNPM	-0.0100846	0.0884022
40S ribosomal protein S21 OS=Ovis aries OX=9940 GN=RPS21 PE=3 SV=1	RPS21	-0.010204	0.0714709
Uncharacterized protein OS=Ovis aries OX=9940 PE=4 SV=1		-0.0102204	0.0789281
Sorting nexin 18 OS=Ovis aries OX=9940 GN=SNX18 PE=3 SV=1	SNX18	-0.010222	0.152878
Sulfatase domain-containing protein OS=Ovis aries OX=9940 GN=ARSA PE=3 SV=1	ARSA	-0.0102598	0.0553855
Uncharacterized protein OS=Ovis aries OX=9940 PE=4 SV=1		-0.0104052	0.0694897
Ubiquitin-like modifier-activating enzyme ATG7 OS=Ovis aries OX=9940 GN=ATG7 PE=3 SV=1	ATG7	-0.0104132	0.0586149
Apolipoprotein A1 (Fragment) OS=Ovis aries OX=9940 PE=2 SV=1	APOA1	-0.0104495	0.0168386
Serine/arginine-rich splicing factor 1 OS=Ovis aries OX=9940 GN=SRSF1 PE=3 SV=1	SRSF1	-0.0104719	0.195836
Peptidase_M14 domain-containing protein OS=Ovis aries OX=9940 GN=CPB2 PE=3 SV=1	CPB2	-0.0105142	0.0352382
Thioredoxin domain-containing protein OS=Ovis aries OX=9940 GN=SCO2 PE=3 SV=1	SCO2	-0.0107124	0.0497769
Family with sequence similarity 120A OS=Ovis aries OX=9940 GN=FAM120A PE=3 SV=1	FAM120A	-0.0108003	0.0740404
Ubiquitin conjugating enzyme E2 I OS=Ovis aries OX=9940 GN=UBE2I PE=3 SV=1	UBE2I	-0.0108812	0.0650813
Four and a half LIM domains 3 OS=Ovis aries OX=9940 GN=FHL3 PE=4 SV=1	FHL3	-0.0110576	0.0818183
FAM192A_Fyv6_N domain-containing protein OS=Ovis aries OX=9940 GN=PSME3IP1 PE=4 SV=1	PSME3IP1	-0.0113076	0.0468856
Diablo homolog, mitochondrial OS=Ovis aries OX=9940 GN=DIABLO PE=4 SV=1	DIABLO	-0.0113513	0.0697759
40S ribosomal protein S19 OS=Ovis aries OX=9940 GN=RPS19 PE=3 SV=1	RPS19	-0.0115993	0.0443756
EWS RNA binding protein 1 OS=Ovis aries OX=9940 GN=EWSR1 PE=3 SV=1	EWSR1	-0.0117043	0.0527552
UBC core domain-containing protein OS=Ovis aries OX=9940 PE=3 SV=1		-0.0117249	0.0603624
RNA helicase OS=Ovis aries OX=9940 GN=DHX16 PE=4 SV=1	DHX16	-0.0117394	0.0667958
40S ribosomal protein S23 OS=Ovis aries OX=9940 GN=RPS23 PE=3 SV=1	RPS23	-0.011807	0.086928
RRM domain-containing protein OS=Ovis aries OX=9940 GN=NIFK PE=4 SV=1	NIFK	-0.0120477	0.0739246
Complex I-B16.6 OS=Ovis aries OX=9940 PE=3 SV=1		-0.0121373	0.0749516
40S ribosomal protein S3 OS=Ovis aries OX=9940 GN=RPS3 PE=3 SV=1	RPS3	-0.0122201	0.108301
Phosphatidylinositol 3-kinase 85 kDa regulatory subunit alpha OS=Ovis aries OX=9940 GN=PIK3R1 PE=3 SV=1	PIK3R1	-0.0122423	0.218049
Heat shock 70 kDa protein 14 OS=Ovis aries OX=9940 GN=HSPA14 PE=3 SV=1	HSPA14	-0.0122912	0.0650415
Aspartate carbamoyltransferase OS=Ovis aries OX=9940 GN=CAD PE=3 SV=1	CAD	-0.0123426	0.0693283
GTP-binding nuclear protein Ran OS=Ovis aries OX=9940 PE=2 SV=1	RAN; LOC105601843	-0.0123824	0.0728786
ADP-ribosylation factor-like 8A OS=Ovis aries OX=9940 GN=ARL8A PE=2 SV=1	ARL8A	-0.0125438	0.020092
Fructose-bisphosphate aldolase OS=Ovis aries OX=9940 GN=ALDOC PE=3 SV=1	ALDOC	-0.0126758	0.0845933
RBR-type E3 ubiquitin transferase OS=Ovis aries OX=9940 GN=ARIH1 PE=4 SV=1	ARIH1	-0.0127925	0.093862
Uncharacterized protein OS=Ovis aries OX=9940 GN=MGST1 PE=3 SV=1	MGST1	-0.0128113	0.0415098
Nudix hydrolase domain-containing protein OS=Ovis aries OX=9940 PE=4 SV=1		-0.0131493	0.0357075
Metavinculin OS=Ovis aries OX=9940 GN=VCL PE=3 SV=1	VCL	-0.0132357	0.106775
Mitochondrial intermediate peptidase OS=Ovis aries OX=9940 GN=MIPEP PE=3 SV=1	MIPEP	-0.0132842	0.0418746
RRM domain-containing protein OS=Ovis aries OX=9940 GN=RBM3 PE=4 SV=1	RBM3	-0.0133115	0.0777791
Peptidylprolyl isomerase OS=Ovis aries OX=9940 GN=FKBP4 PE=4 SV=1	FKBP4	-0.0134007	0.0691503
Transmembrane emp24 domain-containing protein 5 OS=Ovis aries OX=9940 GN=TMED5 PE=3 SV=1	TMED5	-0.0135511	0.0475261
Acetyl-CoA carboxylase 1 OS=Ovis aries OX=9940 GN=ACACA PE=2 SV=1	ACACA	-0.0136267	0.0771531
Phosphate cytidylyltransferase 1, choline, alpha OS=Ovis aries OX=9940 GN=PCYT1A PE=3 SV=1	PCYT1A	-0.0137148	0.165367
Uncharacterized protein OS=Ovis aries OX=9940 GN=MAP3K20 PE=4 SV=1	MAP3K20	-0.0137898	0.0487046
Collagen type IV alpha 1 chain OS=Ovis aries OX=9940 GN=COL4A1 PE=4 SV=1	COL4A1	-0.0138856	0.118211
Protein arginine methyltransferase 1 OS=Ovis aries OX=9940 GN=PRMT1 PE=4 SV=1	PRMT1	-0.0139049	0.0889545
Foie-gras_1 domain-containing protein OS=Ovis aries OX=9940 GN=TRAPPC10 PE=3 SV=1	TRAPPC10	-0.0139693	0.11117
G protein-coupled receptor class C group 5 member D OS=Ovis aries OX=9940 GN=GPRC5D PE=4 SV=1	GPRC5D	-0.0140033	0.216381
TSC22 domain family member 4 OS=Ovis aries OX=9940 GN=TSC22D4 PE=3 SV=1	TSC22D4	-0.0140619	0.0420125
Dihydrolipoyl dehydrogenase OS=Ovis aries OX=9940 GN=DLD PE=3 SV=1	DLD	-0.0141687	0.136905
60S ribosomal protein L35 OS=Ovis aries OX=9940 PE=3 SV=1		-0.0143004	0.131904
Uncharacterized protein OS=Ovis aries OX=9940 GN=STIP1 PE=4 SV=1	STIP1	-0.0143367	0.104687
MIA SH3 domain ER export factor 3 OS=Ovis aries OX=9940 GN=MIA3 PE=4 SV=1	MIA3	-0.0144971	0.0725306
Phosphopantothenoylcysteine synthetase OS=Ovis aries OX=9940 GN=PPCS PE=3 SV=1	PPCS	-0.0145181	0.0825055
Probable tRNA N6-adenosine threonylcarbamoyltransferase OS=Ovis aries OX=9940 GN=OSGEP PE=3 SV=1	OSGEP	-0.0146381	0.096405
Queuine tRNA-ribosyltransferase accessory subunit 2 OS=Ovis aries OX=9940 GN=QTRT2 PE=3 SV=1	QTRT2	-0.0148101	0.0390803
Calcyclin-binding protein OS=Ovis aries OX=9940 GN=CACYBP PE=4 SV=1	CACYBP	-0.0148273	0.0888009
Uncharacterized protein OS=Ovis aries OX=9940 GN=NHLRC3 PE=4 SV=1	NHLRC3	-0.0149324	0.0519049
Uncharacterized protein OS=Ovis aries OX=9940 GN=ACAD11 PE=3 SV=1	ACAD11	-0.0150264	0.0841315
1-phosphatidylinositol 4,5-bisphosphate phosphodiesterase gamma OS=Ovis aries OX=9940 GN=PLCG1 PE=4 SV=1	PLCG1	-0.0150334	0.113247
RNA helicase OS=Ovis aries OX=9940 GN=DDX46 PE=4 SV=1	DDX46	-0.0150512	0.134383
Thrombospondin 4 OS=Ovis aries OX=9940 GN=THBS4 PE=3 SV=1	THBS4	-0.0154302	0.0881598
40S ribosomal protein S28 OS=Ovis aries OX=9940 GN=RPS28 PE=3 SV=1	RPS28	-0.0154624	0.0950188
Syndecan OS=Ovis aries OX=9940 GN=SDC2 PE=3 SV=1	SDC2	-0.0155048	0.119122
Uncharacterized protein OS=Ovis aries OX=9940 GN=SPATS2L PE=3 SV=1	SPATS2L	-0.0155842	0.0486823
Uncharacterized protein OS=Ovis aries OX=9940 GN=CRNKL1 PE=4 SV=1	CRNKL1	-0.0156685	0.0652931
ATP-dependent helicase ATRX OS=Ovis aries OX=9940 GN=ATRX PE=4 SV=1	ATRX	-0.0158684	0.0808906
Sorting nexin 6 OS=Ovis aries OX=9940 GN=SNX6 PE=3 SV=1	SNX6	-0.0160139	0.100803
A2M domain-containing protein OS=Ovis aries OX=9940 PE=4 SV=1		-0.0160571	0.0689619
Ubiquitin family domain containing 1 OS=Ovis aries OX=9940 GN=UBFD1 PE=4 SV=1	UBFD1	-0.0164245	0.0895682
Small nuclear ribonucleoprotein Sm D3 OS=Ovis aries OX=9940 GN=SNRPD3 PE=3 SV=1	SNRPD3	-0.0165039	0.130064
PBX homeobox interacting protein 1 OS=Ovis aries OX=9940 GN=PBXIP1 PE=4 SV=1	PBXIP1	-0.0165266	0.0685517
Intermediate filament type II keratin OS=Ovis aries OX=9940 GN=KRT2.13 PE=3 SV=1	KRT2.13	-0.0165931	0.0284356
CDGSH iron sulfur domain 2 OS=Ovis aries OX=9940 GN=CISD2 PE=4 SV=1	CISD2	-0.0166229	0.140672
Ran GTPase activating protein 1 OS=Ovis aries OX=9940 GN=RANGAP1 PE=4 SV=1	RANGAP1	-0.0166846	0.0956788
Uncharacterized protein OS=Ovis aries OX=9940 PE=3 SV=1		-0.0167023	0.132145
Uncharacterized protein OS=Ovis aries OX=9940 GN=EFCAB14 PE=4 SV=1	EFCAB14	-0.0168428	0.197835
Calcium voltage-gated channel auxiliary subunit alpha2delta 1 OS=Ovis aries OX=9940 GN=CACNA2D1 PE=3 SV=1	CACNA2D1	-0.0168933	0.251265
Protein HGH1 homolog OS=Ovis aries OX=9940 GN=HGH1 PE=3 SV=1	HGH1	-0.0169142	0.0639638
Cullin 3 OS=Ovis aries OX=9940 GN=CUL3 PE=3 SV=1	CUL3	-0.0169218	0.107779
Zinc finger protein 750 OS=Ovis aries OX=9940 GN=ZNF750 PE=4 SV=1	ZNF750	-0.016985	0.0886954
5-oxoprolinase, ATP-hydrolysing OS=Ovis aries OX=9940 GN=OPLAH PE=3 SV=1	OPLAH	-0.0172635	0.150113
5'-AMP-activated protein kinase subunit gamma-1 OS=Ovis aries OX=9940 GN=PRKAG1 PE=3 SV=1	PRKAG1	-0.0175502	0.0847302
Poly(A)-specific ribonuclease PARN OS=Ovis aries OX=9940 GN=PARN PE=3 SV=1	PARN	-0.0178303	0.0818073
Desmoglein 4 OS=Ovis aries OX=9940 GN=DSG4 PE=4 SV=1	DSG4	-0.0178509	0.156581
Ciliary rootlet coiled-coil, rootletin OS=Ovis aries OX=9940 GN=CROCC PE=4 SV=1	CROCC	-0.0181101	0.25426
Serine/threonine-protein phosphatase OS=Ovis aries OX=9940 GN=PPP1CB PE=3 SV=1	PPP1CB	-0.0181516	0.0921229
ADP dependent glucokinase OS=Ovis aries OX=9940 GN=ADPGK PE=4 SV=1	ADPGK	-0.0181732	0.0832034
Tumor protein 63 (p63) OS=Ovis aries OX=9940 GN=TP63 PE=3 SV=1	TP63	-0.0181837	0.0854248
Rho-associated protein kinase OS=Ovis aries OX=9940 GN=ROCK2 PE=3 SV=1	ROCK2	-0.0183334	0.162771
Complex I-9kD OS=Ovis aries OX=9940 GN=NDUFV3 PE=3 SV=1	NDUFV3	-0.0184134	0.197657
DEK proto-oncogene OS=Ovis aries OX=9940 GN=DEK PE=4 SV=1	DEK	-0.0184232	0.159376
Transmembrane 9 superfamily member OS=Ovis aries OX=9940 GN=TM9SF3 PE=3 SV=1	TM9SF3	-0.0184932	0.131394
WAPL cohesin release factor OS=Ovis aries OX=9940 GN=WAPL PE=3 SV=1	WAPL	-0.0185313	0.118299
Prostaglandin F2 receptor inhibitor OS=Ovis aries OX=9940 GN=PTGFRN PE=4 SV=1	PTGFRN	-0.018663	0.132843
DUF3456 domain-containing protein OS=Ovis aries OX=9940 GN=CNPY4 PE=4 SV=1	CNPY4	-0.0187499	0.0481872
AAA domain-containing protein OS=Ovis aries OX=9940 GN=RFC3 PE=4 SV=1	RFC3	-0.0188388	0.0700498
Phosphatidylinositol 4-kinase alpha OS=Ovis aries OX=9940 GN=PI4KA PE=3 SV=1	PI4KA	-0.0188653	0.127616
26S proteasome non-ATPase regulatory subunit 9 OS=Ovis aries OX=9940 GN=PSMD9 PE=3 SV=1	PSMD9	-0.0190774	0.122729
Acyl-peptide hydrolase OS=Ovis aries OX=9940 GN=APEH PE=4 SV=1	APEH	-0.0191211	0.18108
Coiled-coil domain-containing protein 47 OS=Ovis aries OX=9940 GN=CCDC47 PE=4 SV=1	CCDC47	-0.0191785	0.144664
DNA mismatch repair protein OS=Ovis aries OX=9940 GN=MSH6 PE=3 SV=1	MSH6	-0.0192276	0.187606
PseudoU_synth_1 domain-containing protein OS=Ovis aries OX=9940 GN=PUS3 PE=3 SV=1	PUS3	-0.0193567	0.0901061
Chromatin target of PRMT1 OS=Ovis aries OX=9940 GN=CHTOP PE=4 SV=1	CHTOP	-0.0194248	0.19041
Hexose-6-phosphate dehydrogenase/glucose 1-dehydrogenase OS=Ovis aries OX=9940 GN=H6PD PE=4 SV=1	H6PD	-0.0195043	0.122667
LIM domain 7 OS=Ovis aries OX=9940 GN=LMO7 PE=4 SV=1	LMO7	-0.0196298	0.126463
Uncharacterized protein OS=Ovis aries OX=9940 GN=EHD4 PE=4 SV=1	EHD4	-0.0196729	0.173955
DBR1 domain-containing protein OS=Ovis aries OX=9940 GN=DBR1 PE=3 SV=1	DBR1	-0.0197046	0.146905
Carboxypeptidase D OS=Ovis aries OX=9940 GN=CPD PE=3 SV=1	CPD	-0.0197341	0.329873
VWFA domain-containing protein OS=Ovis aries OX=9940 GN=VWA8 PE=4 SV=1	VWA8	-0.0197704	0.127021
Triosephosphate isomerase 1 OS=Ovis aries OX=9940 GN=TPI1 PE=2 SV=1	TPI1	-0.0197847	0.106115
RAB3 GTPase activating non-catalytic protein subunit 2 OS=Ovis aries OX=9940 GN=RAB3GAP2 PE=3 SV=1	RAB3GAP2	-0.0199103	0.136104
Methyltransferase like 9 OS=Ovis aries OX=9940 GN=METTL9 PE=4 SV=1	METTL9	-0.0200198	0.194895
Uncharacterized protein OS=Ovis aries OX=9940 GN=STAM PE=3 SV=1	STAM	-0.0201041	0.0802515
Spliceosome associated factor 1, recruiter of U4/U6.U5 tri-snRNP OS=Ovis aries OX=9940 GN=SART1 PE=3 SV=1	SART1	-0.0201336	0.189126
Uncharacterized protein OS=Ovis aries OX=9940 PE=3 SV=1		-0.0201779	0.144322
LEM domain containing 2 OS=Ovis aries OX=9940 GN=LEMD2 PE=4 SV=1	LEMD2	-0.0202447	0.156606
Glucosidase alpha, acid OS=Ovis aries OX=9940 GN=GAA PE=3 SV=1	GAA	-0.0204452	0.0895744
60S ribosomal protein L31 OS=Ovis aries OX=9940 GN=RPL31 PE=3 SV=1	RPL31	-0.0204764	0.190172
Histone acetyltransferase OS=Ovis aries OX=9940 GN=EP300 PE=4 SV=1	EP300	-0.0206321	0.0527158
Reversion inducing cysteine rich protein with kazal motifs OS=Ovis aries OX=9940 GN=RECK PE=4 SV=1	RECK	-0.0207143	0.235822
Ribosomal_S7 domain-containing protein OS=Ovis aries OX=9940 GN=RPS5 PE=3 SV=1	RPS5	-0.0207486	0.187396
Tumor protein p53 binding protein 1 OS=Ovis aries OX=9940 GN=TP53BP1 PE=4 SV=1	TP53BP1	-0.0208795	0.134436
Uncharacterized protein OS=Ovis aries OX=9940 PE=3 SV=1	LOC101107200	-0.0209502	0.301929
Uncharacterized protein OS=Ovis aries OX=9940 PE=3 SV=1		-0.020981	0.185856
ATP-dependent DNA helicase OS=Ovis aries OX=9940 GN=RECQL PE=3 SV=1	RECQL	-0.0210495	0.0982487
Oxysterol-binding protein OS=Ovis aries OX=9940 GN=OSBPL8 PE=3 SV=1	OSBPL8	-0.0210558	0.190123
3-beta-hydroxysterol Delta (14)-reductase OS=Ovis aries OX=9940 GN=LBR PE=3 SV=1	LBR	-0.0213477	0.228316
TPR_REGION domain-containing protein OS=Ovis aries OX=9940 GN=SGTA PE=3 SV=1	SGTA	-0.0213669	0.105322
60 kDa poly(U)-binding-splicing factor OS=Ovis aries OX=9940 GN=PUF60 PE=3 SV=1	PUF60	-0.0213775	0.113331
Phosphoglucomutase 2 OS=Ovis aries OX=9940 GN=PGM2 PE=3 SV=1	PGM2	-0.0217797	0.151609
Interferon-gamma-inducible lysosomal thiol reductase OS=Ovis aries OX=9940 GN=GILT PE=2 SV=1	GILT	-0.0217908	0.184968
TGc domain-containing protein OS=Ovis aries OX=9940 GN=TGM3 PE=3 SV=1	TGM3	-0.0217954	0.123545
Nucleolar GTP-binding protein 1 OS=Ovis aries OX=9940 GN=GTPBP4 PE=3 SV=1	GTPBP4	-0.0219012	0.136765
Protein lin-7 homolog OS=Ovis aries OX=9940 GN=LIN7A PE=3 SV=1	LIN7A	-0.0223161	0.051972
Uncharacterized protein OS=Ovis aries OX=9940 PE=4 SV=1		-0.0224382	0.113733
Erbb2 interacting protein OS=Ovis aries OX=9940 GN=ERBIN PE=3 SV=1	ERBIN	-0.0224875	0.209509
PHD-type domain-containing protein OS=Ovis aries OX=9940 GN=RSF1 PE=4 SV=1	RSF1	-0.0225608	0.150868
Eukaryotic translation initiation factor 5A OS=Ovis aries OX=9940 GN=EIF5A2 PE=3 SV=1	EIF5A2	-0.0225949	0.1828
PPR_long domain-containing protein OS=Ovis aries OX=9940 PE=4 SV=1		-0.0226369	0.197429
Uncharacterized protein OS=Ovis aries OX=9940 GN=SHFL PE=3 SV=1	SHFL	-0.0227043	0.0823503
Chromosome 11 open reading frame 68 OS=Ovis aries OX=9940 GN=C11orf68 PE=3 SV=1	C11orf68	-0.0229286	0.158078
Caspase 9 OS=Ovis aries OX=9940 GN=CASP9 PE=3 SV=1	CASP9	-0.0229365	0.134074
Uncharacterized protein OS=Ovis aries OX=9940 GN=HYOU1 PE=3 SV=1	HYOU1	-0.023001	0.1453
Vacuolar protein sorting-associated protein 16 homolog OS=Ovis aries OX=9940 GN=VPS16 PE=3 SV=1	VPS16	-0.0230852	0.107676
Uncharacterized protein OS=Ovis aries OX=9940 GN=AHCTF1 PE=4 SV=1	AHCTF1	-0.0231608	0.211212
Uncharacterized protein OS=Ovis aries OX=9940 GN=XRCC5 PE=3 SV=1	XRCC5	-0.0232287	0.148766
RNA-splicing ligase RtcB homolog OS=Ovis aries OX=9940 GN=RTCB PE=3 SV=1	RTCB	-0.0233699	0.124048
RRM domain-containing protein OS=Ovis aries OX=9940 PE=4 SV=1		-0.0236604	0.140778
Serine hydroxymethyltransferase OS=Ovis aries OX=9940 GN=SHMT2 PE=3 SV=1	SHMT2	-0.0237716	0.173955
Tubulin-specific chaperone A OS=Ovis aries OX=9940 PE=3 SV=1		-0.0238518	0.098856
Uncharacterized protein OS=Ovis aries OX=9940 GN=RAB1A PE=4 SV=1	RAB1A	-0.0238835	0.239815
Secretory carrier-associated membrane protein OS=Ovis aries OX=9940 GN=SCAMP1 PE=3 SV=1	SCAMP1	-0.0238914	0.231043
CAP-ZIP_m domain-containing protein OS=Ovis aries OX=9940 GN=WASHC2C PE=4 SV=1	WASHC2C	-0.0240985	0.193766
Transient receptor potential cation channel subfamily V member 4 OS=Ovis aries OX=9940 GN=TRPV4 PE=4 SV=1	TRPV4	-0.0242992	0.0667936
Protein YIPF OS=Ovis aries OX=9940 GN=YIPF6 PE=3 SV=1	YIPF6	-0.0243677	0.0920774
NTPase_I-T domain-containing protein OS=Ovis aries OX=9940 GN=PRRC1 PE=3 SV=1	PRRC1	-0.0243945	0.158889
Mitochondrial import receptor subunit TOM22 homolog OS=Ovis aries OX=9940 GN=TOMM22 PE=3 SV=1	TOMM22	-0.0245401	0.268021
Uncharacterized protein OS=Ovis aries OX=9940 GN=RPL36A PE=3 SV=1	RPL36A	-0.0246418	0.178094
Leucine carboxyl methyltransferase 1 OS=Ovis aries OX=9940 GN=LCMT1 PE=3 SV=1	LCMT1	-0.0249771	0.226164
Serine/threonine-protein phosphatase 2A 56 kDa regulatory subunit OS=Ovis aries OX=9940 GN=PPP2R5A PE=3 SV=1	PPP2R5A	-0.025107	0.185222
Hepatocyte growth factor-regulated tyrosine kinase substrate OS=Ovis aries OX=9940 GN=HGS PE=4 SV=1	HGS	-0.0251229	0.150912
Uncharacterized protein OS=Ovis aries OX=9940 GN=NEMF PE=3 SV=1	NEMF	-0.0251288	0.31571
Zinc finger Ran-binding domain-containing protein 2 OS=Ovis aries OX=9940 GN=LOC101103178 PE=3 SV=1	LOC101103178	-0.0252125	0.154921
ATP synthase F1 subunit epsilon OS=Ovis aries OX=9940 GN=ATP5F1E PE=3 SV=1	ATP5F1E	-0.0252732	0.185201
40S ribosomal protein S6 OS=Ovis aries OX=9940 GN=RPS6 PE=3 SV=1	RPS6	-0.0252801	0.220528
IF rod domain-containing protein OS=Ovis aries OX=9940 GN=KRT26 PE=4 SV=1	KRT26	-0.0252831	0.195878
Fibulin 1-D (Fragment) OS=Ovis aries OX=9940 PE=2 SV=1	LOC100037704; FBLN1	-0.0254165	0.0813026
Lysine demethylase 2A OS=Ovis aries OX=9940 GN=KDM2A PE=4 SV=1	KDM2A	-0.0255	0.179867
Tetraspanin OS=Ovis aries OX=9940 GN=TSPAN18 PE=3 SV=1	TSPAN18	-0.0255771	0.245767
Uncharacterized protein OS=Ovis aries OX=9940 GN=CARMIL1 PE=3 SV=1	CARMIL1	-0.0257662	0.0571213
Clathrin heavy chain OS=Ovis aries OX=9940 GN=CLTC PE=3 SV=1	CLTC	-0.0257848	0.270007
Sec1 family domain containing 1 OS=Ovis aries OX=9940 GN=SCFD1 PE=3 SV=1	SCFD1	-0.025812	0.0847607
Cleavage and polyadenylation specificity factor subunit 4 OS=Ovis aries OX=9940 GN=CPSF4 PE=3 SV=1	CPSF4	-0.0258139	0.151715
BRI3 binding protein OS=Ovis aries OX=9940 GN=BRI3BP PE=4 SV=1	BRI3BP	-0.0258472	0.364778
Protein kinase C iota type OS=Ovis aries OX=9940 GN=PRKCI PE=3 SV=1	PRKCI	-0.0258768	0.129041
Peptidyl-prolyl cis-trans isomerase E OS=Ovis aries OX=9940 GN=PPIE PE=3 SV=1	PPIE	-0.0259404	0.126818
2',3'-cyclic-nucleotide 3'-phosphodiesterase OS=Ovis aries OX=9940 PE=2 SV=1	CNP	-0.0261406	0.232756
Uncharacterized protein OS=Ovis aries OX=9940 PE=3 SV=1	EEF1D; EF-1	-0.0262691	0.236532
Coatomer subunit alpha OS=Ovis aries OX=9940 GN=COPA PE=4 SV=1	COPA	-0.0262788	0.169701
Translocation protein SEC62 OS=Ovis aries OX=9940 GN=SEC62 PE=3 SV=1	SEC62	-0.0264382	0.255246
LEM domain-containing protein OS=Ovis aries OX=9940 PE=4 SV=1		-0.026443	0.153981
Vesicle-associated membrane protein-associated protein A OS=Ovis aries OX=9940 GN=VAPA PE=3 SV=1	VAPA	-0.0265462	0.339405
Collagen type XVII alpha 1 chain OS=Ovis aries OX=9940 GN=COL17A1 PE=4 SV=1	COL17A1	-0.0265639	0.283367
ATP-dependent RNA helicase DDX54 OS=Ovis aries OX=9940 GN=DDX54 PE=3 SV=1	DDX54	-0.0269823	0.101617
Tr-type G domain-containing protein OS=Ovis aries OX=9940 GN=MTIF2 PE=3 SV=1	MTIF2	-0.0270607	0.103608
Uncharacterized protein OS=Ovis aries OX=9940 GN=HNRNPR PE=4 SV=1	HNRNPR	-0.0271038	0.305709
Formin like 2 OS=Ovis aries OX=9940 GN=FMNL2 PE=3 SV=1	FMNL2	-0.0271572	0.164126
Squalene synthase OS=Ovis aries OX=9940 GN=FDFT1 PE=3 SV=1	FDFT1	-0.0271885	0.31475
DEAD box protein 5 OS=Ovis aries OX=9940 GN=DDX5 PE=3 SV=1	DDX5	-0.0272754	0.152162
Uncharacterized protein OS=Ovis aries OX=9940 GN=RAB23 PE=4 SV=1	RAB23	-0.0273499	0.0966077
Prostacyclin synthase OS=Ovis aries OX=9940 GN=PTGIS PE=3 SV=1	PTGIS	-0.0274411	0.260634
ZFP36 ring finger protein like 1 OS=Ovis aries OX=9940 GN=ZFP36L1 PE=4 SV=1	ZFP36L1	-0.0274644	0.194895
Protein phosphatase 1 regulatory subunit OS=Ovis aries OX=9940 GN=PPP1R12A PE=4 SV=1	PPP1R12A	-0.0276936	0.277074
Uncharacterized protein OS=Ovis aries OX=9940 GN=PITPNA PE=4 SV=1	PITPNA	-0.027751	0.389713
WD_REPEATS_REGION domain-containing protein OS=Ovis aries OX=9940 GN=RBBP4 PE=4 SV=1	RBBP4	-0.0277623	0.265447
Multifunctional fusion protein OS=Ovis aries OX=9940 GN=ALDH4A1 PE=3 SV=1	ALDH4A1	-0.0278824	0.100177
Uncharacterized protein OS=Ovis aries OX=9940 PE=4 SV=1	LOC101119027	-0.0279215	0.268102
Proteasome subunit beta OS=Ovis aries OX=9940 GN=PSMB5 PE=3 SV=1	PSMB5	-0.0280196	0.252777
Protein transport protein sec16 OS=Ovis aries OX=9940 GN=SEC16A PE=3 SV=1	SEC16A	-0.0280468	0.180081
LIM domain-containing protein 1 OS=Ovis aries OX=9940 GN=LIMD1 PE=3 SV=1	LIMD1	-0.0280867	0.218756
Acyl-coenzyme A oxidase OS=Ovis aries OX=9940 GN=ACOX1 PE=3 SV=1	ACOX1	-0.0284538	0.11275
Zinc finger and BTB domain containing 33 OS=Ovis aries OX=9940 GN=ZBTB33 PE=4 SV=1	ZBTB33	-0.0284842	0.29293
Secretory carrier-associated membrane protein OS=Ovis aries OX=9940 GN=SCAMP2 PE=3 SV=1	SCAMP2	-0.0285147	0.279129
Drebrin 1 OS=Ovis aries OX=9940 GN=DBN1 PE=4 SV=1	DBN1	-0.0285956	0.14801
Uncharacterized protein OS=Ovis aries OX=9940 GN=RRP7A PE=3 SV=1	RRP7A	-0.0286426	0.262659
Uncharacterized protein OS=Ovis aries OX=9940 GN=MYO5A PE=3 SV=1	MYO5A	-0.0287532	0.040466
Transducin beta like 2 OS=Ovis aries OX=9940 GN=TBL2 PE=4 SV=1	TBL2	-0.028823	0.205376
Ribosomal_L18_c domain-containing protein OS=Ovis aries OX=9940 PE=3 SV=1		-0.0289026	0.233501
Sulfurtransferase OS=Ovis aries OX=9940 GN=MPST PE=4 SV=1	MPST	-0.0290306	0.171751
Uncharacterized protein OS=Ovis aries OX=9940 GN=UGGT1 PE=4 SV=1	UGGT1	-0.0290479	0.295836
Endoplasmic reticulum lectin 1 OS=Ovis aries OX=9940 GN=ERLEC1 PE=4 SV=1	ERLEC1	-0.0291188	0.0487427
Mitogen-activated protein kinase kinase kinase 7 OS=Ovis aries OX=9940 GN=MAP3K7 PE=3 SV=1	MAP3K7	-0.029168	0.115907
Uncharacterized protein OS=Ovis aries OX=9940 GN=G3BP2 PE=4 SV=1	G3BP2	-0.0292494	0.311367
Multimerin 2 OS=Ovis aries OX=9940 GN=MMRN2 PE=4 SV=1	MMRN2	-0.0292995	1.06399
Calcium/calmodulin dependent protein kinase ID OS=Ovis aries OX=9940 GN=CAMK1D PE=4 SV=1	CAMK1D	-0.0293077	0.15308
Uncharacterized protein OS=Ovis aries OX=9940 GN=HTATSF1 PE=3 SV=1	HTATSF1	-0.029444	0.772256
Syntaxin 12 OS=Ovis aries OX=9940 GN=STX12 PE=3 SV=1	STX12	-0.0295043	0.355574
Mediator complex subunit 22 OS=Ovis aries OX=9940 GN=MED22 PE=4 SV=1	MED22	-0.0295521	0.0938413
60S ribosomal protein L30 OS=Ovis aries OX=9940 GN=LOC101106855 PE=3 SV=1	LOC101106855	-0.0295606	0.321034
Signal peptidase complex catalytic subunit SEC11 OS=Ovis aries OX=9940 GN=SEC11A PE=3 SV=1	SEC11A	-0.0297453	0.310202
N(alpha)-acetyltransferase 50, NatE catalytic subunit OS=Ovis aries OX=9940 GN=NAA50 PE=4 SV=1	NAA50	-0.0298535	0.140355
Proteasome assembly chaperone 3 OS=Ovis aries OX=9940 GN=PSMG3 PE=3 SV=1	PSMG3	-0.0299198	0.139502
Sorting nexin 9 OS=Ovis aries OX=9940 GN=SNX9 PE=3 SV=1	SNX9	-0.0299321	0.245272
40S ribosomal protein S15 (Fragment) OS=Ovis aries OX=9940 GN=RPs15 PE=2 SV=1	RPs15	-0.0300999	0.196525
Uncharacterized protein OS=Ovis aries OX=9940 GN=AIDA PE=3 SV=1	AIDA	-0.0301126	0.0879445
Importin N-terminal domain-containing protein OS=Ovis aries OX=9940 GN=IPO7 PE=4 SV=1	IPO7	-0.0302293	0.20913
KRR-R motif-containing protein 1 OS=Ovis aries OX=9940 GN=KRR1 PE=3 SV=1	KRR1	-0.0302389	0.197195
Eukaryotic translation initiation factor 3 subunit L OS=Ovis aries OX=9940 GN=EIF3L PE=3 SV=1	EIF3L	-0.0303433	0.523607
UPAR/Ly6 domain-containing protein OS=Ovis aries OX=9940 GN=LY6D PE=4 SV=1	LY6D	-0.0304215	0.267758
Ribosomal protein L15 OS=Ovis aries OX=9940 PE=3 SV=1	LOC101109701	-0.0305509	0.379366
WD_REPEATS_REGION domain-containing protein OS=Ovis aries OX=9940 GN=PRPF4 PE=4 SV=1	PRPF4	-0.0306112	0.386097
Heat shock protein family A (Hsp70) member 8 OS=Ovis aries OX=9940 GN=HSPA8 PE=3 SV=1	HSPA8	-0.0306927	0.224075
Proteasome subunit beta OS=Ovis aries OX=9940 GN=PSMB7 PE=3 SV=1	PSMB7	-0.0307139	0.311584
MIT domain-containing protein OS=Ovis aries OX=9940 GN=SPART PE=4 SV=1	SPART	-0.0309728	0.437275
Sorting nexin-3 OS=Ovis aries OX=9940 GN=SNX3 PE=3 SV=1	SNX3	-0.0310822	0.175841
Uncharacterized protein OS=Ovis aries OX=9940 GN=SYNE1 PE=3 SV=1	SYNE1	-0.0311107	0.268556
Ceramide synthase 2 OS=Ovis aries OX=9940 GN=CERS2 PE=4 SV=1	CERS2	-0.0311244	0.549509
Neurobeachin like 2 OS=Ovis aries OX=9940 GN=NBEAL2 PE=3 SV=1	NBEAL2	-0.0312206	0.102104
C-type lectin domain-containing protein OS=Ovis aries OX=9940 GN=CLEC3B PE=4 SV=1	CLEC3B	-0.0312548	0.219588
WASH complex subunit 5 OS=Ovis aries OX=9940 GN=WASHC5 PE=3 SV=1	WASHC5	-0.0313616	0.125572
Uncharacterized protein OS=Ovis aries OX=9940 PE=3 SV=1		-0.0315058	0.218541
PHD finger protein 3 OS=Ovis aries OX=9940 GN=PHF3 PE=4 SV=1	PHF3	-0.0315572	0.645269
NSFL1 cofactor p47 OS=Ovis aries OX=9940 GN=NSFL1C PE=4 SV=1	NSFL1C	-0.0316526	0.276144
Tumor protein translationally-controlled 1 OS=Ovis aries OX=9940 GN=TCTP PE=2 SV=1	TCTP	-0.0317303	0.250603
RNA helicase OS=Ovis aries OX=9940 GN=DDX39A PE=4 SV=1	DDX39A	-0.031862	0.106121
Acyl-CoA binding domain containing 3 OS=Ovis aries OX=9940 GN=ACBD3 PE=4 SV=1	ACBD3	-0.0322949	0.314055
Uncharacterized protein OS=Ovis aries OX=9940 GN=MCCC2 PE=4 SV=1	MCCC2	-0.0324203	0.831959
Signal transducer and activator of transcription OS=Ovis aries OX=9940 GN=STAT2 PE=3 SV=1	STAT2	-0.0324569	0.223933
Microtubule associated protein 1 light chain 3 alpha OS=Ovis aries OX=9940 GN=MAP1LC3A PE=3 SV=1	MAP1LC3A	-0.0327251	0.514593
Brain-specific angiogenesis inhibitor 1-associated protein 2 OS=Ovis aries OX=9940 GN=BAIAP2 PE=4 SV=1	BAIAP2	-0.0328851	0.236284
Pumilio RNA binding family member 3 OS=Ovis aries OX=9940 GN=PUM3 PE=4 SV=1	PUM3	-0.0329179	0.127848
Acetoacetyl-CoA synthetase OS=Ovis aries OX=9940 GN=AACS PE=3 SV=1	AACS	-0.0330174	0.0988199
Protein C10 OS=Ovis aries OX=9940 GN=C12orf57 PE=3 SV=1	C12orf57	-0.0330358	0.186859
SERPIN domain-containing protein OS=Ovis aries OX=9940 GN=SERPINF2 PE=3 SV=1	SERPINF2	-0.0330482	0.160589
Uncharacterized protein OS=Ovis aries OX=9940 GN=CCDC12 PE=4 SV=1	CCDC12	-0.0332829	0.306466
Uncharacterized protein OS=Ovis aries OX=9940 PE=3 SV=1		-0.0334546	0.339341
Importin N-terminal domain-containing protein OS=Ovis aries OX=9940 GN=IPO8 PE=4 SV=1	IPO8	-0.0334674	0.206398
Uncharacterized protein OS=Ovis aries OX=9940 PE=4 SV=1		-0.0335908	0.20846
60S ribosomal protein L28 OS=Ovis aries OX=9940 GN=RPL28 PE=3 SV=1	RPL28	-0.0337081	0.357469
Coiled-coil domain-containing protein 86 OS=Ovis aries OX=9940 GN=CCDC86 PE=4 SV=1	CCDC86	-0.0337425	0.301236
Transforming growth factor beta-1-induced transcript 1 protein OS=Ovis aries OX=9940 GN=TGFB1I1 PE=3 SV=1	TGFB1I1	-0.033805	0.116383
FACT complex subunit SSRP1 OS=Ovis aries OX=9940 GN=SSRP1 PE=3 SV=1	SSRP1	-0.0339155	0.238037
Cystatin C OS=Ovis aries OX=9940 GN=CST3 PE=2 SV=1	CST3	-0.0339617	0.370236
Uncharacterized protein OS=Ovis aries OX=9940 PE=3 SV=1		-0.0342177	0.10898
Uncharacterized protein OS=Ovis aries OX=9940 GN=MAGOH PE=3 SV=1	MAGOH	-0.034245	0.226777
t-SNARE coiled-coil homology domain-containing protein OS=Ovis aries OX=9940 GN=STX16 PE=3 SV=1	STX16	-0.0343456	0.38869
Glucose transporter type 1, erythrocyte/brain OS=Ovis aries OX=9940 GN=SLC2A1 PE=3 SV=1	SLC2A1	-0.0344695	0.253986
Zinc finger protein 326 OS=Ovis aries OX=9940 GN=ZNF326 PE=3 SV=1	ZNF326	-0.0345009	0.407562
Interleukin-18 OS=Ovis aries OX=9940 GN=IL18 PE=3 SV=1	IL18	-0.0346075	0.0617914
Uncharacterized protein OS=Ovis aries OX=9940 PE=4 SV=1		-0.0346271	0.206569
ADP-ribosylhydrolase like 2 OS=Ovis aries OX=9940 GN=ADPRS PE=3 SV=1	ADPRS	-0.0347042	0.14471
SWI/SNF related, matrix associated, actin dependent regulator of chromatin, subfamily a, member 4 OS=Ovis aries OX=9940 GN=SMARCA4 PE=3 SV=1	SMARCA4	-0.0347677	0.417173
RNA helicase OS=Ovis aries OX=9940 GN=EIF4A3 PE=3 SV=1	EIF4A3	-0.0349042	0.393401
SEL1L adaptor subunit of ERAD E3 ubiquitin ligase OS=Ovis aries OX=9940 GN=SEL1L PE=4 SV=1	SEL1L	-0.0349651	0.192413
Castor zinc finger 1 OS=Ovis aries OX=9940 GN=CASZ1 PE=4 SV=1	CASZ1	-0.035129	0.445179
Fibronectin OS=Ovis aries OX=9940 GN=FN1 PE=4 SV=1	FN1	-0.0352453	0.612183
Amine oxidase OS=Ovis aries OX=9940 GN=MAOA PE=3 SV=1	MAOA	-0.0353354	0.222366
UBC core domain-containing protein OS=Ovis aries OX=9940 GN=UBE2R2 PE=3 SV=1	UBE2R2	-0.035417	0.211833
Tripartite motif containing 56 OS=Ovis aries OX=9940 GN=TRIM56 PE=3 SV=1	TRIM56	-0.0355353	0.289366
FACT complex subunit OS=Ovis aries OX=9940 GN=SUPT16H PE=3 SV=1	SUPT16H	-0.0356242	0.387942
Proteasome subunit alpha type OS=Ovis aries OX=9940 GN=PSMA2 PE=3 SV=1	PSMA2	-0.0356279	0.275519
Nucleosome assembly protein 1 like 4 OS=Ovis aries OX=9940 GN=NAP1L4 PE=3 SV=1	NAP1L4	-0.0356732	0.25723
Flavodoxin_2 domain-containing protein OS=Ovis aries OX=9940 GN=NQO1 PE=3 SV=1	NQO1	-0.0357591	0.111119
Thyroid hormone receptor interactor 6 OS=Ovis aries OX=9940 GN=TRIP6 PE=4 SV=1	TRIP6	-0.0357693	0.213917
Uncharacterized protein OS=Ovis aries OX=9940 GN=XRCC4 PE=4 SV=1	XRCC4	-0.0358828	0.377997
Coiled-coil domain-containing protein 43 OS=Ovis aries OX=9940 GN=CCDC43 PE=3 SV=1	CCDC43	-0.0360357	0.140248
Regulator of chromosome condensation 2 OS=Ovis aries OX=9940 GN=RCC2 PE=4 SV=1	RCC2	-0.0361504	0.396748
Nucleoporin 214 OS=Ovis aries OX=9940 GN=NUP214 PE=4 SV=1	NUP214	-0.0362471	0.475067
Cathepsin X OS=Ovis aries OX=9940 GN=CTSZ PE=3 SV=1	CTSZ	-0.0364686	0.224285
Chondroitin sulfate proteoglycan 4 OS=Ovis aries OX=9940 GN=CSPG4 PE=4 SV=1	CSPG4	-0.0365084	0.711365
Tyrosine 3-monooxygenase/tryptophan 5-monooxygenase activation protein theta OS=Ovis aries OX=9940 GN=YWHAQ PE=3 SV=1	YWHAQ	-0.0365337	0.285562
Perilipin OS=Ovis aries OX=9940 GN=PLIN3 PE=3 SV=1	PLIN3	-0.0367521	0.396657
RNA helicase OS=Ovis aries OX=9940 GN=DHX9 PE=3 SV=1	DHX9	-0.0368912	0.401711
Ribosome maturation protein SBDS OS=Ovis aries OX=9940 GN=SBDS PE=3 SV=1	SBDS	-0.0369514	0.251639
Maillard deglycase OS=Ovis aries OX=9940 GN=PARK7 PE=3 SV=1	PARK7	-0.0370052	0.214562
Interferon induced protein with tetratricopeptide repeats 5 OS=Ovis aries OX=9940 GN=IFIT5 PE=4 SV=1	IFIT5	-0.037268	0.268363
Uncharacterized protein OS=Ovis aries OX=9940 GN=RPL7 PE=3 SV=1	RPL7	-0.037271	0.299053
t-SNARE coiled-coil homology domain-containing protein OS=Ovis aries OX=9940 GN=STX17 PE=3 SV=1	STX17	-0.0373986	0.104608
ER membrane protein complex subunit 1 OS=Ovis aries OX=9940 GN=EMC1 PE=3 SV=1	EMC1	-0.0374931	0.593044
Transformation/transcription domain associated protein OS=Ovis aries OX=9940 GN=TRRAP PE=4 SV=1	TRRAP	-0.0375409	0.300618
Interleukin-1 OS=Ovis aries OX=9940 GN=IL1RN PE=2 SV=1	IL1RN	-0.0376145	0.258785
Mitogen-activated protein kinase kinase 3 OS=Ovis aries OX=9940 GN=MAP2K3 PE=3 SV=1	MAP2K3	-0.037656	0.197338
Uncharacterized protein OS=Ovis aries OX=9940 PE=4 SV=1		-0.0377556	0.780992
Glucose-6-phosphate 1-dehydrogenase OS=Ovis aries OX=9940 GN=G6PD PE=3 SV=1	G6PD	-0.0377587	0.193175
La ribonucleoprotein 1, translational regulator OS=Ovis aries OX=9940 GN=LARP1 PE=4 SV=1	LARP1	-0.037857	0.268993
Ubiquitin protein ligase E3 component n-recognin 4 OS=Ovis aries OX=9940 GN=UBR4 PE=3 SV=1	UBR4	-0.0379643	0.352181
Uncharacterized protein OS=Ovis aries OX=9940 GN=CSRP2 PE=4 SV=1	CSRP2	-0.0381278	0.781651
PPM-type phosphatase domain-containing protein OS=Ovis aries OX=9940 GN=PDP1 PE=3 SV=1	PDP1	-0.0381676	0.157911
TAFII28 domain-containing protein OS=Ovis aries OX=9940 GN=LOC101104431 PE=3 SV=1	LOC101104431	-0.0381853	0.509111
PPFIA binding protein 2 OS=Ovis aries OX=9940 GN=PPFIBP2 PE=3 SV=1	PPFIBP2	-0.0381966	0.314982
40S ribosomal protein S2 OS=Ovis aries OX=9940 GN=RPS2 PE=3 SV=1	RPS2	-0.0382048	0.324716
Cytochrome b-c1 complex subunit Rieske, mitochondrial OS=Ovis aries OX=9940 GN=LOC101113001 PE=1 SV=1	LOC101113001	-0.0382234	0.206784
RNA helicase OS=Ovis aries OX=9940 GN=DHX8 PE=4 SV=1	DHX8	-0.038304	0.144412
Collagen type XXI alpha 1 chain OS=Ovis aries OX=9940 GN=COL21A1 PE=4 SV=1	COL21A1	-0.0383265	0.160913
Uncharacterized protein OS=Ovis aries OX=9940 GN=SIPA1L1 PE=4 SV=1	SIPA1L1	-0.038456	0.132339
SAM_MT_RSMB_NOP domain-containing protein OS=Ovis aries OX=9940 GN=NOP2 PE=3 SV=1	NOP2	-0.0384573	0.212338
Uncharacterized protein OS=Ovis aries OX=9940 PE=3 SV=1		-0.0385381	0.388819
Alpha-1-B glycoprotein OS=Ovis aries OX=9940 GN=A1BG PE=4 SV=1	A1BG	-0.0386379	0.236608
Actin (Fragment) OS=Ovis aries OX=9940 PE=2 SV=1	LOC443340; ACTG1	-0.0386929	0.370166
BCL2L2-PABPN1 readthrough OS=Ovis aries OX=9940 GN=BCL2L2-PABPN1 PE=3 SV=1	BCL2L2-PABPN1	-0.0387136	0.860895
NCK adaptor protein 2 OS=Ovis aries OX=9940 GN=NCK2 PE=4 SV=1	NCK2	-0.0388197	0.195106
Receptor-type tyrosine-protein phosphatase OS=Ovis aries OX=9940 GN=PTPRE PE=3 SV=1	PTPRE	-0.0388401	0.308134
Seryl-tRNA synthetase OS=Ovis aries OX=9940 GN=SARS1 PE=3 SV=1	SARS1	-0.0389206	0.164966
Signal recognition particle subunit SRP68 OS=Ovis aries OX=9940 GN=SRP68 PE=3 SV=1	SRP68	-0.0389232	0.239211
UBC core domain-containing protein OS=Ovis aries OX=9940 PE=3 SV=1		-0.0391173	0.247672
Adenylyl-sulfate kinase OS=Ovis aries OX=9940 PE=3 SV=1		-0.0391357	0.218826
Coiled-coil domain-containing protein 25 OS=Ovis aries OX=9940 GN=CCDC25 PE=3 SV=1	CCDC25	-0.0392703	0.397542
Gal_mutarotas_2 domain-containing protein OS=Ovis aries OX=9940 GN=GANAB PE=3 SV=1	GANAB	-0.0393488	0.234727
Heat shock protein alpha OS=Ovis aries OX=9940 GN=HSPCA PE=3 SV=1	HSPCA	-0.0393869	0.273509
EMAP like 2 OS=Ovis aries OX=9940 GN=EML2 PE=3 SV=1	EML2	-0.0394033	0.201402
UV excision repair protein RAD23 OS=Ovis aries OX=9940 GN=RAD23A PE=3 SV=1	RAD23A	-0.0396425	0.320485
KN motif and ankyrin repeat domains 2 OS=Ovis aries OX=9940 GN=KANK2 PE=4 SV=1	KANK2	-0.0396689	0.981864
Metastasis associated 1 family member 2 OS=Ovis aries OX=9940 GN=MTA2 PE=4 SV=1	MTA2	-0.0397691	0.321849
Amine oxidase OS=Ovis aries OX=9940 PE=3 SV=1		-0.0398383	0.368377
Uncharacterized protein OS=Ovis aries OX=9940 PE=4 SV=1		-0.0398827	0.430161
Uncharacterized protein OS=Ovis aries OX=9940 GN=SLC27A3 PE=3 SV=1	SLC27A3	-0.0399022	0.145518
Uncharacterized protein OS=Ovis aries OX=9940 GN=IGBP1 PE=4 SV=1	IGBP1	-0.0399242	0.579384
m7GpppX diphosphatase OS=Ovis aries OX=9940 GN=DCPS PE=3 SV=1	DCPS	-0.0403973	0.26617
Collagen type VI alpha 5 chain OS=Ovis aries OX=9940 GN=COL6A5 PE=4 SV=1	COL6A5	-0.0404563	0.173296
Structural maintenance of chromosomes protein OS=Ovis aries OX=9940 GN=SMC2 PE=3 SV=1	SMC2	-0.0405363	0.277206
E3 ubiquitin-protein ligase RNF114 OS=Ovis aries OX=9940 GN=RNF114 PE=4 SV=1	RNF114	-0.0406122	0.199986
Peptidase_M24 domain-containing protein OS=Ovis aries OX=9940 GN=PA2G4 PE=3 SV=1	PA2G4	-0.0406547	0.470729
Uncharacterized protein OS=Ovis aries OX=9940 GN=PDS5B PE=3 SV=1	PDS5B	-0.0407285	0.57592
Ubiquitin conjugating enzyme E2 L3 OS=Ovis aries OX=9940 PE=3 SV=1		-0.0407759	0.360281
Solute carrier family 30 member 9 OS=Ovis aries OX=9940 GN=SLC30A9 PE=3 SV=1	SLC30A9	-0.0408505	0.166052
KOW domain-containing protein OS=Ovis aries OX=9940 GN=RPL26 PE=3 SV=1	RPL26	-0.0408841	0.284813
Glyoxylate reductase 1 homolog OS=Ovis aries OX=9940 GN=GLYR1 PE=3 SV=1	GLYR1	-0.0409061	0.247818
CCR4-NOT transcription complex subunit 11 OS=Ovis aries OX=9940 GN=CNOT11 PE=3 SV=1	CNOT11	-0.0409128	0.35248
Phospholysine phosphohistidine inorganic pyrophosphate phosphatase OS=Ovis aries OX=9940 GN=LHPP PE=4 SV=1	LHPP	-0.0411049	0.153798
Tenascin C OS=Ovis aries OX=9940 GN=TNC PE=3 SV=1	TNC	-0.0411751	0.377919
DUF1681 domain-containing protein OS=Ovis aries OX=9940 GN=NECAP2 PE=3 SV=1	NECAP2	-0.0414204	0.187731
Epithelial splicing regulatory protein 1 OS=Ovis aries OX=9940 GN=ESRP1 PE=3 SV=1	ESRP1	-0.0414206	0.39233
Uncharacterized protein OS=Ovis aries OX=9940 GN=PON2 PE=3 SV=1	PON2	-0.0414432	0.270959
NADH dehydrogenase [ubiquinone] 1 alpha subcomplex subunit 8 OS=Ovis aries OX=9940 GN=NDUFA8 PE=1 SV=1	NDUFA8	-0.0415032	0.286359
Aminotran_1_2 domain-containing protein OS=Ovis aries OX=9940 GN=SPTLC2 PE=3 SV=1	SPTLC2	-0.0415944	0.44033
Uncharacterized protein OS=Ovis aries OX=9940 GN=UQCRC2 PE=1 SV=1	UQCRC2	-0.0416466	0.223291
Protocadherin 1 OS=Ovis aries OX=9940 GN=PCDH1 PE=4 SV=1	PCDH1	-0.0416925	0.40787
Polypeptide N-acetylgalactosaminyltransferase OS=Ovis aries OX=9940 GN=GALNT2 PE=3 SV=1	GALNT2	-0.0417056	0.390809
Septin-2 OS=Ovis aries OX=9940 PE=3 SV=1		-0.0417258	0.462104
Eukaryotic translation initiation factor 3 subunit B OS=Ovis aries OX=9940 GN=EIF3B PE=3 SV=1	EIF3B	-0.0417453	0.22334
Cyclin-T1 OS=Ovis aries OX=9940 GN=CCNT1 PE=3 SV=1	CCNT1	-0.0419957	0.18062
Prolyl 3-hydroxylase family member 4 (inactive) OS=Ovis aries OX=9940 GN=P3H4 PE=4 SV=1	P3H4	-0.0420683	0.12473
N-alpha-acetyltransferase 35, NatC auxiliary subunit OS=Ovis aries OX=9940 GN=NAA35 PE=3 SV=1	NAA35	-0.0420935	0.114025
Uncharacterized protein OS=Ovis aries OX=9940 GN=CLDND1 PE=4 SV=1	CLDND1	-0.0421135	0.283188
60S ribosomal protein L35a OS=Ovis aries OX=9940 PE=3 SV=1	LOC101112702	-0.0421791	0.347131
NADH dehydrogenase [ubiquinone] 1 alpha subcomplex subunit 10, mitochondrial OS=Ovis aries OX=9940 GN=NDUFA10 PE=1 SV=1	NDUFA10	-0.0422503	0.168431
Uncharacterized protein OS=Ovis aries OX=9940 GN=HNRNPH3 PE=4 SV=1	HNRNPH3	-0.0422861	0.82008
Hook microtubule tethering protein 3 OS=Ovis aries OX=9940 GN=HOOK3 PE=3 SV=1	HOOK3	-0.0424065	0.338757
Raftlin, lipid raft linker 1 OS=Ovis aries OX=9940 GN=RFTN1 PE=3 SV=1	RFTN1	-0.0425586	0.224046
Angiomotin like 1 OS=Ovis aries OX=9940 GN=AMOTL1 PE=3 SV=1	AMOTL1	-0.0425789	0.18602
Nucleoporin 210 OS=Ovis aries OX=9940 GN=NUP210 PE=4 SV=1	NUP210	-0.0426418	0.324329
Poly(U)-specific endoribonuclease OS=Ovis aries OX=9940 GN=ENDOU PE=3 SV=1	ENDOU	-0.0426675	0.373137
Uncharacterized protein OS=Ovis aries OX=9940 GN=RBM27 PE=4 SV=1	RBM27	-0.0426967	0.140093
Transcription elongation factor SPT5 OS=Ovis aries OX=9940 GN=SUPT5H PE=3 SV=1	SUPT5H	-0.04289	0.242638
Myelin basic protein OS=Ovis aries OX=9940 PE=3 SV=1		-0.0429493	0.153415
Uncharacterized protein OS=Ovis aries OX=9940 PE=4 SV=1		-0.0429525	1.07442
dCTP pyrophosphatase 1 OS=Ovis aries OX=9940 GN=DCTPP1 PE=4 SV=1	DCTPP1	-0.0429737	0.224041
E3 ubiquitin-protein ligase OS=Ovis aries OX=9940 GN=NEDD4 PE=4 SV=1	NEDD4	-0.0430415	0.221597
Prefoldin subunit 3 OS=Ovis aries OX=9940 GN=VBP1 PE=3 SV=1	VBP1	-0.0430854	0.357431
Complement component 1 Q subcomponent-binding protein, mitochondrial OS=Ovis aries OX=9940 GN=C1QBP PE=3 SV=1	C1QBP	-0.0431044	0.234896
Uncharacterized protein OS=Ovis aries OX=9940 GN=CNNM4 PE=3 SV=1	CNNM4	-0.0432263	0.182661
Heterogeneous nuclear ribonucleoproteins A2/B1 OS=Ovis aries OX=9940 GN=HNRNPA2B1 PE=4 SV=1	HNRNPA2B1	-0.0435851	0.32706
PDZ domain-containing protein OS=Ovis aries OX=9940 GN=GOPC PE=4 SV=1	GOPC	-0.0436765	0.253817
Small ArfGAP 1 OS=Ovis aries OX=9940 GN=SMAP1 PE=4 SV=1	SMAP1	-0.0437521	0.303522
Dimethylargininase OS=Ovis aries OX=9940 GN=DDAH2 PE=3 SV=1	DDAH2	-0.0438802	0.414337
COP9 signalosome complex subunit 3 OS=Ovis aries OX=9940 GN=COPS3 PE=3 SV=1	COPS3	-0.0440153	0.941662
Peptidase M60 domain-containing protein OS=Ovis aries OX=9940 PE=3 SV=1	LOC101115959	-0.0440977	0.130749
RB1 inducible coiled-coil 1 OS=Ovis aries OX=9940 GN=RB1CC1 PE=4 SV=1	RB1CC1	-0.0442543	0.530357
Inositol-1-monophosphatase OS=Ovis aries OX=9940 GN=IMPA2 PE=3 SV=1	IMPA2	-0.0443146	0.326452
WD_REPEATS_REGION domain-containing protein OS=Ovis aries OX=9940 GN=STRAP PE=4 SV=1	STRAP	-0.0443902	0.355716
NAD kinase 2, mitochondrial OS=Ovis aries OX=9940 GN=NADK2 PE=3 SV=1	NADK2	-0.0444648	0.30909
Nuclear cap-binding protein subunit 2 OS=Ovis aries OX=9940 GN=NCBP2 PE=3 SV=1	NCBP2	-0.0445249	0.494484
Microsomal prostaglandin E synthase 2 OS=Ovis aries OX=9940 PE=3 SV=1		-0.0446223	0.752312
Ribosomal_L18_c domain-containing protein OS=Ovis aries OX=9940 PE=3 SV=1		-0.0447892	0.406227
GIPC PDZ domain containing family member 1 OS=Ovis aries OX=9940 GN=GIPC1 PE=3 SV=1	GIPC1	-0.0448388	0.440399
Cell cycle associated protein 1 OS=Ovis aries OX=9940 GN=CAPRIN1 PE=3 SV=1	CAPRIN1	-0.0448604	0.517481
Periplakin OS=Ovis aries OX=9940 GN=PPL PE=4 SV=1	PPL	-0.0448847	0.657304
CCT-beta OS=Ovis aries OX=9940 GN=CCT2 PE=3 SV=1	CCT2	-0.0449718	0.29894
Uncharacterized protein OS=Ovis aries OX=9940 GN=WASHC4 PE=4 SV=1	WASHC4	-0.0449906	0.348698
Sorting nexin-2 OS=Ovis aries OX=9940 GN=SNX2 PE=3 SV=1	SNX2	-0.0450482	0.30049
Peroxin-19 OS=Ovis aries OX=9940 GN=PEX19 PE=3 SV=1	PEX19	-0.0451133	0.654785
2-aminoethanethiol dioxygenase OS=Ovis aries OX=9940 GN=ADO PE=4 SV=1	ADO	-0.0451712	0.202479
ATP binding cassette subfamily B member 8 OS=Ovis aries OX=9940 GN=ABCB8 PE=4 SV=1	ABCB8	-0.0451929	0.679875
Glutaredoxin domain-containing protein OS=Ovis aries OX=9940 GN=GLRX5 PE=4 SV=1	GLRX5	-0.0452033	0.239769
Uncharacterized protein OS=Ovis aries OX=9940 GN=CXADR PE=4 SV=1	CXADR	-0.0452829	0.480351
Family with sequence similarity 98 member A OS=Ovis aries OX=9940 GN=FAM98A PE=3 SV=1	FAM98A	-0.0454175	0.222013
40S ribosomal protein S18 OS=Ovis aries OX=9940 GN=RPS18 PE=3 SV=1	RPS18	-0.0455965	0.299801
Transket_pyr domain-containing protein OS=Ovis aries OX=9940 GN=DHTKD1 PE=3 SV=1	DHTKD1	-0.0456982	0.694721
V-type proton ATPase subunit a OS=Ovis aries OX=9940 GN=ATP6V0A1 PE=3 SV=1	ATP6V0A1	-0.045883	0.381645
Interferon regulatory factor 2 binding protein 1 OS=Ovis aries OX=9940 GN=IRF2BP1 PE=3 SV=1	IRF2BP1	-0.0462351	0.255049
Ribosomal_L23eN domain-containing protein OS=Ovis aries OX=9940 PE=3 SV=1		-0.0463653	0.292531
Uncharacterized protein OS=Ovis aries OX=9940 GN=SREK1 PE=4 SV=1	SREK1	-0.0463685	0.229108
Collagen type VI alpha 3 chain OS=Ovis aries OX=9940 GN=COL6A3 PE=4 SV=1	COL6A3	-0.0464325	0.310196
Lactoylglutathione lyase OS=Ovis aries OX=9940 GN=GLO1 PE=3 SV=1	GLO1	-0.0465029	0.26153
Lysophospholipase 1 OS=Ovis aries OX=9940 GN=LYPLA1 PE=3 SV=1	LYPLA1	-0.0465234	0.43784
Uncharacterized protein OS=Ovis aries OX=9940 GN=SRP19 PE=3 SV=1	SRP19	-0.0465462	0.226269
Homer scaffold protein 2 OS=Ovis aries OX=9940 GN=HOMER2 PE=4 SV=1	HOMER2	-0.0465915	0.228773
Cytoplasmic protein OS=Ovis aries OX=9940 GN=NCK1 PE=4 SV=1	NCK1	-0.0465953	0.276663
TATA-box binding protein associated factor 6 OS=Ovis aries OX=9940 GN=TAF6 PE=3 SV=1	TAF6	-0.0466961	0.257008
Uncharacterized protein OS=Ovis aries OX=9940 GN=THRAP3 PE=3 SV=1	THRAP3	-0.0467108	0.88469
Peptidase S1 domain-containing protein OS=Ovis aries OX=9940 GN=KLK12 PE=4 SV=1	KLK12	-0.046738	0.432237
G protein subunit alpha q OS=Ovis aries OX=9940 GN=GNAQ PE=3 SV=1	GNAQ	-0.0467604	0.622115
Monocyte differentiation antigen CD14 OS=Ovis aries OX=9940 GN=CD14 PE=2 SV=1	CD14	-0.0467735	0.648757
Uncharacterized protein OS=Ovis aries OX=9940 GN=ITIH5 PE=3 SV=1	ITIH5	-0.0468392	0.611905
COP9 signalosome complex subunit 4 OS=Ovis aries OX=9940 GN=COPS4 PE=3 SV=1	COPS4	-0.0468931	0.264598
Transcription factor YY1 (Fragment) OS=Ovis aries OX=9940 PE=2 SV=1	LOC494431; YY1	-0.0470093	0.490117
Ankyrin 2 OS=Ovis aries OX=9940 GN=ANK2 PE=4 SV=1	ANK2	-0.0471915	0.448573
Uncharacterized protein OS=Ovis aries OX=9940 PE=4 SV=1		-0.0473488	0.488636
Component 3 of promoter of RISC OS=Ovis aries OX=9940 GN=TSN PE=3 SV=1	TSN	-0.0473774	0.277863
Adenylosuccinate synthetase isozyme 2 OS=Ovis aries OX=9940 GN=ADSS PE=3 SV=1	ADSS	-0.0473955	0.21257
Mitochondrial Rho GTPase OS=Ovis aries OX=9940 GN=RHOT1 PE=3 SV=1	RHOT1	-0.0474373	0.147381
Transferrin receptor protein 1 OS=Ovis aries OX=9940 GN=TFRC PE=3 SV=1	TFRC	-0.0476652	0.826732
Maturin OS=Ovis aries OX=9940 GN=MTURN PE=3 SV=1	MTURN	-0.0477087	0.422387
ANK_REP_REGION domain-containing protein OS=Ovis aries OX=9940 GN=GABPB1 PE=4 SV=1	GABPB1	-0.0477813	0.561002
Protein kinase domain-containing protein OS=Ovis aries OX=9940 GN=NRBP1 PE=4 SV=1	NRBP1	-0.0479253	0.311943
Pachytene checkpoint protein 2 homolog OS=Ovis aries OX=9940 GN=TRIP13 PE=3 SV=1	TRIP13	-0.0480398	0.294921
Uncharacterized protein OS=Ovis aries OX=9940 GN=RAB6A PE=4 SV=1	RAB6A	-0.0480848	0.522192
WD_REPEATS_REGION domain-containing protein OS=Ovis aries OX=9940 GN=DYNC1I2 PE=3 SV=1	DYNC1I2	-0.048104	0.544552
Protein argonaute-2 OS=Ovis aries OX=9940 GN=AGO2 PE=3 SV=1	AGO2	-0.0481376	0.603571
Protein-arginine deiminase type-3 OS=Ovis aries OX=9940 GN=PADI3 PE=1 SV=1	PADI3	-0.0483308	0.406435
Uncharacterized protein OS=Ovis aries OX=9940 GN=EIF2B4 PE=3 SV=1	EIF2B4	-0.048507	0.401846
Uncharacterized protein OS=Ovis aries OX=9940 GN=RETREG2 PE=4 SV=1	RETREG2	-0.0485563	0.295647
Transmembrane protein 68 OS=Ovis aries OX=9940 GN=TMEM68 PE=4 SV=1	TMEM68	-0.0485928	0.332691
Heterogeneous nuclear ribonucleoprotein A0 OS=Ovis aries OX=9940 GN=HNRNPA0 PE=4 SV=1	HNRNPA0	-0.0486092	0.246743
[truncated: 2,759 more rows]
